# Supplementary material for: Genetic architecture of 11 organ traits derived from abdominal MRI using deep learning
Source: eLife. 2021 Jun 15;10:e65554. doi: 10.7554/eLife.65554 (PMC8205492; doi:10.7554/eLife.65554)
Supplement: Supplementary file 1. [file elife-65554-supp1.xlsx]

## Sheet: Table 1 Study population
	UK Biobank cohort (at time of baseline visit)	Imaging cohort (at time of imaging visit)	GWAS cohort
			Volumes	Pancreas 3D	Pancreas 2D	Liver 2D
n	502520	38881	32860	31758	25617	32858
% Female	54.4	51.8	51.5	0.514	51.2	51.5
Age	56.5 (8.1)	63.7 (7.56)	63.9 (7.52)	63.8 (7.52)	64.2 (7.48)	63.9 (7.52)
BMI (kg/m2)	27.4 (4.8)	26.5 (4.39)	26.5 (4.37)	26.5 (4.34)	26.5 (4.31)	26.5 (4.36)
Height (cm)	168 (9.28)	169 (9.3)	169 (9.26)	169 (9.25)	169 (9.26)	169 (9.26)
% Caucasian	81.5	81.5	100	100	100	100

## Sheet: Table 2 Population summaries
Trait	Organ	Combined	Female	Male	# Independent study-wide significant GWAS hits
Volume (L)	VAT	3.92 (2.3)	2.78 (1.6)	5.14 (2.3)	3
	ASAT	8.16 (4.1)	9.57 (4.3)	6.64 (3.2)	1
	Lungs	2.67 (0.73)	2.32 (0.53)	3.03 (0.75)	5
	Spleen	0.17 (0.072)	0.14 (0.054)	0.2 (0.078)	29
	Kidney	0.14 (0.03)	0.12 (0.023)	0.16 (0.028)	9
	Pancreas	0.06 (0.018)	0.06 (0.016)	0.06 (0.019)	11
	Liver	1.38 (0.3)	1.28 (0.25)	1.49 (0.3)	11
Fat (%)	Pancreas	10.41 (7.9)	8.34 (6.7)	12.6 (8.5)	7
	Liver	5.06 (5)	4.43 (4.7)	5.73 (5.2)	8
Iron (mg/g)	Pancreas	0.77 (0.097)	0.8 (0.1)	0.75 (0.084)	0
	Liver	1.22 (0.26)	1.2 (0.24)	1.24 (0.28)	6

## Sheet: File 1a Segmentation Performanc
Dataset	dice-sim	jaccard	neg-pred-value	precision	recall	specificity
Dixon Abdominal Cavity (train)	0.955001	0.914199	0.997876	0.95987	0.950939	0.998312
Dixon Abdominal Cavity (val)	0.956067	0.916098	0.998129	0.953272	0.959579	0.997971
Dixon Body Cavity (train)	0.969074	0.940243	0.994914	0.971287	0.967044	0.995719
Dixon Body Cavity (val)	0.961702	0.926463	0.993701	0.962691	0.961242	0.994194
Dixon Kidney Left (train)	0.910856	0.837616	0.999951	0.898825	0.9289	0.999933
Dixon Kidney Left (val)	0.889019	0.803285	0.999941	0.88128	0.906302	0.999925
Dixon Kidney Right (train)	0.905808	0.829087	0.999951	0.890056	0.928911	0.999927
Dixon Kidney Left (val)	0.894087	0.809939	0.999946	0.875946	0.924132	0.999916
Dixon Liver (train)	0.935076	0.878661	0.99964	0.926547	0.945027	0.99952
Dixon Liver (val)	0.932121	0.87316	0.999514	0.935999	0.9302	0.999582
Dixon Lungs (train)	0.972914	0.947534	0.99986	0.957816	0.988705	0.999489
Dixon Lungs (val)	0.976983	0.955036	0.999896	0.963068	0.991351	0.999554
Dixon Spleen (train)	0.902801	0.83208	0.999939	0.90487	0.915199	0.999934
Dixon Spleen (val)	0.909961	0.835773	0.999931	0.915621	0.909938	0.999934
IDEAL Liver (train) - no ablation	0.949515	0.904942	0.994336	0.95271	0.948422	0.995144
IDEAL Liver (train) - 25% ablation	0.851167	0.741772	0.972757	0.995617	0.744816	0.999692
IDEAL Liver (val) - no ablation	0.913161	0.844789	0.9901	0.919763	0.915604	0.991004
IDEAL Liver (val) - 25% ablation	0.834702	0.720093	0.97019	0.978072	0.73438	0.998094
GRE Liver (train) - no ablation	0.943757	0.894696	0.989535	0.98127	0.910421	0.997999
GRE Liver (train) - 25% ablation	0.818817	0.694082	0.964634	0.998416	0.694885	0.999894
GRE Liver (val) - no ablation	0.927031	0.865416	0.986606	0.965486	0.893984	0.996027
GRE Liver (val) - 25% ablation	0.817148	0.692393	0.963016	0.99774	0.693525	0.999829
T1w Pancreas (train)	0.913871	0.842963	0.999578	0.900874	0.9279	0.99939
T1w Pancreas (val)	0.857499	0.758719	0.999368	0.838086	0.886969	0.999117

## Sheet: File 1b Number of individuals a
Modality	Field	Attended imaging visit	Scan data received	Processing successful	Quantification successful	Included GWAS
Dixon	20201	43190	38929	38755	38683	32860
T1 Pancreas	20202	43190	37391	37387	37385	31758
2D Pancreas	20260	43190	31017	31010	28784	25617
IDEAL liver	20254	43190	30113	30113	30074	-
Multiecho liver	20203	43190	10130	10114	10052	-
Combined liver	-	43190	-	-	38639	32858

## Sheet: File 1c Significant PheWAS asso
Trait	Organ	phenotype	description	beta	SE	p	n_cases	n_controls
Volume	Liver	250.2	Type 2 diabetes	0.73	0.036	1.3e-92	1029	36617
Volume	Liver	250	Diabetes mellitus	0.7	0.035	5.899999999999999e-89	1091	36555
Volume	Liver	401.1	Essential hypertension	0.19	0.022	1.2e-17	5204	32442
Volume	Liver	401	Hypertension	0.18	0.022	3.9e-17	5215	32431
Volume	Liver	427.2	Atrial fibrillation and flutter	-0.3	0.054	3.3e-8	832	36814
Volume	Liver	716.9	Arthropathy NOS	0.16	0.029	3.5e-8	2397	35249
Volume	Liver	626.12	Excessive or frequent menstruation	0.27	0.05	3.9e-8	921	36725
Volume	Liver	716	Other arthropathies	0.16	0.029	4.1e-8	2406	35240
Volume	Liver	218	Benign neoplasm of uterus	0.27	0.049	5.5e-8	1073	36573
Volume	Liver	218.1	Uterine leiomyoma	0.26	0.049	1.2e-7	1056	36590
Volume	Liver	562	Diverticulosis and diverticulitis	0.16	0.03	1.4e-7	2434	35212
Volume	Liver	562.1	Diverticulosis	0.16	0.03	1.4e-7	2434	35212
Volume	Liver	208	Benign neoplasm of colon	0.17	0.034	2e-7	1782	35864
Volume	Liver	318	Tobacco use disorder	0.22	0.043	4.2e-7	958	36688
Volume	Liver	411.4	Coronary atherosclerosis	-0.22	0.044	4.8e-7	1242	36404
Volume	Liver	411.2	Myocardial infarction	-0.28	0.058	1.1e-6	686	36960
Volume	Liver	740	Osteoarthrosis	0.19	0.04	1.3e-6	1241	36405
Volume	Liver	427	Cardiac dysrhythmias	-0.19	0.04	1.3e-6	1548	36098
Volume	Liver	411	Ischemic Heart Disease	-0.17	0.036	1.3e-6	1915	35731
Volume	Liver	571.5	Other chronic nonalcoholic liver disease	0.42	0.088	1.5e-6	124	37522
Volume	Liver	626.1	Irregular menstrual cycle/bleeding	0.2	0.042	1.7e-6	1508	36138
Volume	Liver	740.9	Osteoarthrosis NOS	0.22	0.048	4.2e-6	842	36804
Volume	Liver	571	Chronic liver disease and cirrhosis	0.38	0.083	4.5e-6	149	37497
Volume	Liver	306	Other mental disorder	0.14	0.03	7.3e-6	2183	35463
Volume	Liver	359.2	Myopathy	0.87	0.2	1e-5	24	37622
Volume	Liver	624.9	stress incontinence, female	0.3	0.069	1.3e-5	476	37170
Volume	Liver	351	Other peripheral nerve disorders	0.19	0.045	1.8e-5	919	36727
Volume	Liver	618	Genital prolapse	0.24	0.055	1.8e-5	866	36780
Volume	Liver	327.3	Sleep apnea	0.24	0.056	2.1e-5	342	37304
Volume	Liver	626	Disorders of menstruation and other abnormal bleeding from female genital tract	0.17	0.04	2.1e-5	1753	35893
Volume	Liver	204.1	Lymphoid leukemia	0.8	0.2	4.7e-5	32	37614
Volume	Liver	204.12	Lymphoid leukemia, chronic	0.8	0.2	4.7e-5	32	37614
Volume	Pancreas	250.1	Type 1 diabetes	-0.77	0.081	4.9e-21	104	36173
Volume	Pancreas	250	Diabetes mellitus	-0.28	0.03	5.7e-21	1061	35216
Volume	Pancreas	250.2	Type 2 diabetes	-0.27	0.031	1.1e-17	1001	35276
Volume	Pancreas	197	Chemotherapy	-0.19	0.035	5.2e-8	933	35344
Volume	Pancreas	530	Diseases of esophagus	-0.11	0.02	6.9e-8	2877	33400
Volume	Pancreas	530.1	Esophagitis, GERD and related diseases	-0.11	0.021	1.3e-7	2706	33571
Volume	Pancreas	202	Cancer of other lymphoid, histiocytic tissue	-0.42	0.08	1.9e-7	145	36132
Volume	Pancreas	716.9	Arthropathy NOS	-0.11	0.023	5.6e-7	2296	33981
Volume	Pancreas	716	Other arthropathies	-0.11	0.023	6.9e-7	2304	33973
Volume	Pancreas	550.2	Diaphragmatic hernia	-0.11	0.023	1.1e-6	2200	34077
Volume	Pancreas	250.23	Type 2 diabetes with ophthalmic manifestations	-0.64	0.14	3.6e-6	38	36239
Volume	Pancreas	519.8	Other diseases of respiratory system, NEC	-0.22	0.049	5.8e-6	421	35856
Volume	Pancreas	535	Gastritis and duodenitis	-0.099	0.022	5.9e-6	2522	33755
Volume	Pancreas	041	Bacterial infection NOS	-0.19	0.041	6e-6	603	35674
Volume	Pancreas	202.2	Non-Hodgkins lymphoma	-0.41	0.091	8.9e-6	113	36164
Volume	Pancreas	530.11	GERD	-0.13	0.03	1.9e-5	1287	34990
Volume	Pancreas	211	Benign neoplasm of other parts of digestive system	-0.2	0.048	2e-5	485	35792
Volume	Pancreas	557.1	Celiac disease	-0.35	0.084	3e-5	154	36123
Volume	Pancreas	519	Other diseases of respiratory system, not elsewhere classified	-0.19	0.048	4.8e-5	453	35824
Volume	Kidney	250	Diabetes mellitus	0.42	0.04	2.6e-26	1091	36555
Volume	Kidney	250.2	Type 2 diabetes	0.4	0.041	3.3e-23	1029	36617
Volume	Kidney	585.3	Chronic renal failure [CKD]	-1	0.11	8e-23	87	37559
Volume	Kidney	585	Renal failure	-0.72	0.073	1.4000000000000002e-22	254	37392
Volume	Kidney	401.1	Essential hypertension	0.19	0.021	6.6e-19	5204	32442
Volume	Kidney	401	Hypertension	0.19	0.021	3.8e-18	5215	32431
Volume	Kidney	401.22	Hypertensive chronic kidney disease	-1.1	0.14	3e-14	32	37614
Volume	Kidney	751.22	Other specified congenital anomalies of kidney	-1.2	0.17	1.4e-12	28	37618
Volume	Kidney	318	Tobacco use disorder	0.31	0.045	2.6e-12	958	36688
Volume	Kidney	401.2	Hypertensive heart and/or renal disease	-1	0.14	2.7e-12	37	37609
Volume	Kidney	189.1	Cancer of kidney and renal pelvis	-0.96	0.14	5.2e-12	43	37603
Volume	Kidney	189.11	Malignant neoplasm of kidney, except pelvis	-0.96	0.14	5.2e-12	43	37603
Volume	Kidney	580	Nephritis; nephrosis; renal sclerosis	-1	0.15	1.4e-11	38	37608
Volume	Kidney	585.2	Renal failure NOS	-1	0.15	1.8e-11	40	37606
Volume	Kidney	580.14	Chronic glomerulonephritis, NOS	-1.1	0.21	3.3e-7	21	37625
Volume	Kidney	751.2	Congenital anomalies of urinary system	-0.8	0.16	5.1e-7	52	37594
Volume	Kidney	317	Alcohol-related disorders	0.21	0.043	8e-7	1056	36590
Volume	Kidney	585.1	Acute renal failure	-0.47	0.097	1.6e-6	159	37487
Volume	Kidney	250.1	Type 1 diabetes	0.57	0.12	4.6e-6	108	37538
Volume	Kidney	415	Pulmonary heart disease	-0.4	0.09	9.8e-6	189	37457
Volume	Kidney	280.1	Iron deficiency anemias, unspecified or not due to blood loss	-0.26	0.059	1.3e-5	619	37027
Volume	Kidney	317.1	Alcoholism	0.21	0.048	1.3e-5	852	36794
Volume	Kidney	580.1	Glomerulonephritis	-0.93	0.22	1.7e-5	24	37622
Volume	Kidney	285	Other anemias	-0.24	0.056	1.8e-5	685	36961
Volume	Kidney	280	Iron deficiency anemias	-0.25	0.058	1.8e-5	646	37000
Volume	Kidney	272	Disorders of lipoid metabolism	0.12	0.029	4.6e-5	2484	35162
Volume	Kidney	272.1	Hyperlipidemia	0.12	0.029	5.2e-5	2477	35169
Volume	Spleen	200	Myeloproliferative disease	0.74	0.062	2.1999999999999997e-33	62	37584
Volume	Spleen	579.2	Splenomegaly	0.85	0.082	8.899999999999999e-25	23	37623
Volume	Spleen	204.1	Lymphoid leukemia	0.78	0.078	9.899999999999999e-24	32	37614
Volume	Spleen	204.12	Lymphoid leukemia, chronic	0.78	0.078	9.899999999999999e-24	32	37614
Volume	Spleen	200.1	Polycythemia vera	0.73	0.076	1.5e-21	29	37617
Volume	Spleen	204	Leukemia	0.59	0.062	1.6e-21	82	37564
Volume	Spleen	282	Hereditary hemolytic anemias	0.83	0.097	1.5e-17	31	37615
Volume	Spleen	579	Other symptoms involving abdomen and pelvis	0.54	0.067	4.4e-16	86	37560
Volume	Spleen	697	Sarcoidosis	0.59	0.076	7.9e-15	53	37593
Volume	Spleen	571.8	Liver abscess and sequelae of chronic liver disease	0.67	0.087	2.1e-14	24	37622
Volume	Spleen	571	Chronic liver disease and cirrhosis	0.43	0.058	1.8e-13	149	37497
Volume	Spleen	250.2	Type 2 diabetes	0.21	0.03	1.2e-12	1029	36617
Volume	Spleen	572	Ascites (non malignant)	0.63	0.094	3e-11	31	37615
Volume	Spleen	250	Diabetes mellitus	0.19	0.029	3.6e-11	1091	36555
Volume	Spleen	401	Hypertension	0.11	0.017	3.7e-10	5215	32431
Volume	Spleen	401.1	Essential hypertension	0.11	0.017	5.5e-10	5204	32442
Volume	Spleen	573	Other disorders of liver	0.45	0.073	8.4e-10	88	37558
Volume	Spleen	571.5	Other chronic nonalcoholic liver disease	0.39	0.066	3.4e-9	124	37522
Volume	Spleen	202	Cancer of other lymphoid, histiocytic tissue	0.37	0.062	3.7e-9	150	37496
Volume	Spleen	218	Benign neoplasm of uterus	0.25	0.043	5.9e-9	1073	36573
Volume	Spleen	218.1	Uterine leiomyoma	0.25	0.044	1e-8	1056	36590
Volume	Spleen	289.8	Polycythemia, secondary	0.54	0.097	2e-8	23	37623
Volume	Spleen	275.1	Disorders of iron metabolism	0.44	0.079	3.6e-8	56	37590
Volume	Spleen	285	Other anemias	0.22	0.042	7.6e-8	685	36961
Volume	Spleen	202.2	Non-Hodgkins lymphoma	0.36	0.069	2.2e-7	117	37529
Volume	Spleen	574	Cholelithiasis and cholecystitis	0.16	0.032	4.5e-7	1179	36467
Volume	Spleen	276.13	Hyperpotassemia	0.48	0.096	4.8e-7	37	37609
Volume	Spleen	275	Disorders of mineral metabolism	0.35	0.071	9.2e-7	114	37532
Volume	Spleen	600	Hyperplasia of prostate	0.15	0.03	9.4e-7	1053	36593
Volume	Spleen	574.1	Cholelithiasis	0.16	0.035	4.7e-6	1007	36639
Volume	Spleen	585	Renal failure	0.25	0.055	8.2e-6	254	37392
Volume	Spleen	274.1	Gout	0.23	0.053	1.4e-5	218	37428
Volume	Spleen	208	Benign neoplasm of colon	0.11	0.026	1.4e-5	1782	35864
Volume	Spleen	287.3	Thrombocytopenia	0.37	0.086	1.6e-5	88	37558
Volume	Spleen	214	Lipoma	0.17	0.04	2.1e-5	657	36989
Volume	Spleen	286.7	Other and unspecified coagulation defects	0.6	0.14	3.2e-5	20	37626
Volume	Spleen	287	Purpura and other hemorrhagic conditions	0.35	0.085	3.4e-5	95	37551
Volume	Spleen	189.1	Cancer of kidney and renal pelvis	0.41	0.099	3.6e-5	43	37603
Volume	Spleen	189.11	Malignant neoplasm of kidney, except pelvis	0.41	0.099	3.6e-5	43	37603
Volume	Spleen	214.1	Lipoma of skin and subcutaneous tissue	0.19	0.046	4.7e-5	507	37139
Volume	Spleen	585.1	Acute renal failure	0.27	0.066	5.7e-5	159	37487
Volume	Spleen	574.11	Cholelithiasis with acute cholecystitis	0.32	0.08	5.7e-5	104	37542
Volume	Spleen	564	Functional digestive disorders	0.11	0.027	6e-5	1833	35813
Volume	Lungs	318	Tobacco use disorder	0.5	0.035	1.8e-46	958	36688
Volume	Lungs	496	Chronic airway obstruction	0.61	0.049	3.5999999999999997e-35	414	37232
Volume	Lungs	495	Asthma	0.26	0.028	1.3e-20	2090	35556
Volume	Lungs	496.1	Emphysema	0.83	0.12	2.2e-12	47	37599
Volume	Lungs	496.21	Obstructive chronic bronchitis	0.74	0.12	2.5e-10	54	37592
Volume	Lungs	250.2	Type 2 diabetes	-0.26	0.045	8e-9	1029	36617
Volume	Lungs	306	Other mental disorder	0.15	0.027	3.5e-8	2183	35463
Volume	Lungs	250	Diabetes mellitus	-0.24	0.043	3.5e-8	1091	36555
Volume	Lungs	496.2	Chronic bronchitis	0.61	0.11	9.1e-8	67	37579
Volume	Lungs	480.1	Bacterial pneumonia	0.29	0.066	8.4e-6	306	37340
Volume	Lungs	574.1	Cholelithiasis	-0.21	0.049	2.1e-5	1007	36639
Volume	Lungs	443	Peripheral vascular disease	0.39	0.094	4.1e-5	146	37500
Volume	Lungs	272.1	Hyperlipidemia	-0.11	0.028	6.4e-5	2477	35169
Volume	ASAT	835	Internal derangement of knee	-0.38	0.065	3.3e-9	1479	36167
Volume	ASAT	574	Cholelithiasis and cholecystitis	0.38	0.067	1.3e-8	1179	36467
Volume	ASAT	574.1	Cholelithiasis	0.38	0.071	1.3e-7	1007	36639
Volume	ASAT	530	Diseases of esophagus	0.22	0.046	3.5e-6	2987	34659
Volume	ASAT	550.2	Diaphragmatic hernia	0.24	0.052	4e-6	2291	35355
Volume	ASAT	716.2	Unspecified monoarthritis	-0.33	0.075	8.9e-6	973	36673
Volume	ASAT	530.1	Esophagitis, GERD and related diseases	0.2	0.047	1.8e-5	2804	34842
Volume	ASAT	727	Other disorders of synovium, tendon, and bursa	-0.36	0.084	2.2e-5	860	36786
Volume	ASAT	618	Genital prolapse	0.36	0.085	2.3e-5	866	36780
Volume	ASAT	318	Tobacco use disorder	-0.33	0.079	2.3e-5	958	36688
Volume	ASAT	727.1	Synovitis and tenosynovitis	-0.5	0.12	3.4e-5	410	37236
Volume	ASAT	716	Other arthropathies	-0.21	0.051	3.8e-5	2406	35240
Volume	ASAT	550.4	Umbilical hernia	-0.54	0.13	4.5e-5	271	37375
Volume	ASAT	716.9	Arthropathy NOS	-0.21	0.051	5.5e-5	2397	35249
Volume	VAT	401	Hypertension	0.39	0.026	1e-49	5215	32431
Volume	VAT	401.1	Essential hypertension	0.39	0.026	1.4999999999999998e-49	5204	32442
Volume	VAT	250.2	Type 2 diabetes	0.69	0.049	8.1e-44	1029	36617
Volume	VAT	250	Diabetes mellitus	0.63	0.048	1.4999999999999998e-39	1091	36555
Volume	VAT	272	Disorders of lipoid metabolism	0.42	0.035	1.9e-33	2484	35162
Volume	VAT	272.1	Hyperlipidemia	0.42	0.035	3.5e-33	2477	35169
Volume	VAT	272.11	Hypercholesterolemia	0.4	0.036	6.599999999999999e-29	2289	35357
Volume	VAT	495	Asthma	0.39	0.039	5.600000000000001e-23	2090	35556
Volume	VAT	562	Diverticulosis and diverticulitis	0.33	0.036	9.8e-20	2434	35212
Volume	VAT	562.1	Diverticulosis	0.33	0.036	9.8e-20	2434	35212
Volume	VAT	550.2	Diaphragmatic hernia	0.31	0.037	5e-17	2291	35355
Volume	VAT	411	Ischemic Heart Disease	0.32	0.039	3e-16	1915	35731
Volume	VAT	574	Cholelithiasis and cholecystitis	0.42	0.052	3e-16	1179	36467
Volume	VAT	618.1	Prolapse of vaginal walls	0.79	0.1	1.3e-14	487	37159
Volume	VAT	574.1	Cholelithiasis	0.41	0.055	1.5e-13	1007	36639
Volume	VAT	418	Nonspecific chest pain	0.28	0.038	5.3e-13	2131	35515
Volume	VAT	496	Chronic airway obstruction	0.57	0.081	1.9e-12	414	37232
Volume	VAT	618	Genital prolapse	0.56	0.081	3.9e-12	866	36780
Volume	VAT	411.3	Angina pectoris	0.36	0.052	5.6e-12	953	36693
Volume	VAT	530	Diseases of esophagus	0.22	0.033	2.8e-11	2987	34659
Volume	VAT	208	Benign neoplasm of colon	0.27	0.041	3.3e-11	1782	35864
Volume	VAT	594	Urinary calculus	0.44	0.068	9e-11	555	37091
Volume	VAT	535	Gastritis and duodenitis	0.23	0.036	1.2e-10	2622	35024
Volume	VAT	785	Abdominal pain	0.21	0.033	3.3e-10	3504	34142
Volume	VAT	306	Other mental disorder	0.23	0.037	4.2e-10	2183	35463
Volume	VAT	550.4	Umbilical hernia	0.56	0.09	5.1e-10	271	37375
Volume	VAT	411.8	Other chronic ischemic heart disease, unspecified	0.36	0.058	5.6e-10	744	36902
Volume	VAT	530.1	Esophagitis, GERD and related diseases	0.21	0.034	6.8e-10	2804	34842
Volume	VAT	411.4	Coronary atherosclerosis	0.27	0.047	4.3e-9	1242	36404
Volume	VAT	535.6	Duodenitis	0.37	0.065	1.5e-8	650	36996
Volume	VAT	318	Tobacco use disorder	0.3	0.055	4.7e-8	958	36688
Volume	VAT	594.3	Calculus of ureter	0.59	0.11	5.3e-8	214	37432
Volume	VAT	594.8	Renal colic	0.62	0.12	2.3e-7	172	37474
Volume	VAT	565	Anal and rectal conditions	0.24	0.049	6.1e-7	1268	36378
Volume	VAT	574.3	Cholecystitis without cholelithiasis	0.63	0.13	6.2e-7	187	37459
Volume	VAT	519.8	Other diseases of respiratory system, NEC	0.39	0.081	1.2e-6	441	37205
Volume	VAT	564	Functional digestive disorders	0.2	0.042	1.5e-6	1833	35813
Volume	VAT	174.11	Malignant neoplasm of female breast	0.39	0.081	1.8e-6	878	36768
Volume	VAT	614.1	Pelvic peritoneal adhesions, female (postoperative) (postinfection)	0.72	0.15	1.9e-6	230	37416
Volume	VAT	008.5	Bacterial enteritis	0.64	0.13	1.9e-6	171	37475
Volume	VAT	411.2	Myocardial infarction	0.29	0.06	1.9e-6	686	36960
Volume	VAT	174	Breast cancer	0.37	0.079	2.1e-6	947	36699
Volume	VAT	760	Back pain	0.3	0.064	2.1e-6	747	36899
Volume	VAT	174.1	Breast cancer [female]	0.37	0.079	2.5e-6	944	36702
Volume	VAT	519	Other diseases of respiratory system, not elsewhere classified	0.37	0.078	2.5e-6	474	37172
Volume	VAT	278	Overweight, obesity and other hyperalimentation	0.29	0.062	2.6e-6	669	36977
Volume	VAT	965	Poisoning by analgesics, antipyretics, and antirheumatics	0.44	0.095	3.3e-6	344	37302
Volume	VAT	317	Alcohol-related disorders	0.24	0.053	3.7e-6	1056	36590
Volume	VAT	278.1	Obesity	0.28	0.062	5.6e-6	660	36986
Volume	VAT	008	Intestinal infection	0.5	0.11	5.7e-6	250	37396
Volume	VAT	530.11	GERD	0.22	0.049	7.7e-6	1323	36323
Volume	VAT	300.1	Anxiety disorder	0.35	0.08	1.1e-5	501	37145
Volume	VAT	835	Internal derangement of knee	-0.2	0.046	1.2e-5	1479	36167
Volume	VAT	565.1	Anal and rectal polyp	0.29	0.066	1.3e-5	663	36983
Volume	VAT	614	Inflammatory diseases of female pelvic organs	0.45	0.11	2.2e-5	519	37127
Volume	VAT	512.7	Shortness of breath	0.37	0.087	2.2e-5	360	37286
Volume	VAT	594.1	Calculus of kidney	0.42	0.1	3.3e-5	245	37401
Volume	VAT	550	Abdominal hernia	0.12	0.029	3.9e-5	3963	33683
Volume	VAT	530.12	Ulcer of esophagus	0.36	0.087	4e-5	344	37302
Volume	VAT	496.2	Chronic bronchitis	0.8	0.2	4e-5	67	37579
Volume	VAT	530.14	Reflux esophagitis	0.23	0.056	4.4e-5	914	36732
Volume	VAT	496.21	Obstructive chronic bronchitis	0.86	0.21	5.6e-5	54	37592
Fat	Liver	250.2	Type 2 diabetes	0.29	0.024	1.4e-34	1026	36420
Fat	Liver	250	Diabetes mellitus	0.27	0.023	5.1000000000000004e-30	1088	36358
Fat	Liver	571.5	Other chronic nonalcoholic liver disease	0.42	0.052	8.8e-16	124	37322
Fat	Liver	571	Chronic liver disease and cirrhosis	0.39	0.049	2.8e-15	148	37298
Fat	Liver	618.1	Prolapse of vaginal walls	0.25	0.04	4.6e-10	486	36960
Fat	Liver	618	Genital prolapse	0.18	0.034	1.5e-7	865	36581
Fat	Liver	401.1	Essential hypertension	0.072	0.016	3.4e-6	5168	32278
Fat	Liver	562	Diverticulosis and diverticulitis	0.097	0.021	3.8e-6	2421	35025
Fat	Liver	562.1	Diverticulosis	0.097	0.021	3.8e-6	2421	35025
Fat	Liver	594	Urinary calculus	0.17	0.037	4.8e-6	551	36895
Fat	Liver	401	Hypertension	0.071	0.016	5.2e-6	5179	32267
Fat	Liver	427.2	Atrial fibrillation and flutter	-0.21	0.046	5.7e-6	824	36622
Fat	Liver	174.1	Breast cancer [female]	0.15	0.035	1.8e-5	941	36505
Fat	Liver	174	Breast cancer	0.15	0.035	2.1e-5	944	36502
Fat	Liver	594.1	Calculus of kidney	0.22	0.052	3.2e-5	244	37202
Fat	Pancreas	495	Asthma	0.18	0.027	5.1e-11	1510	26359
Fat	Pancreas	250.2	Type 2 diabetes	0.18	0.034	1.2e-7	711	27158
Fat	Pancreas	550.2	Diaphragmatic hernia	0.14	0.026	1.7e-7	1600	26269
Fat	Pancreas	272	Disorders of lipoid metabolism	0.12	0.024	3.7e-7	1742	26127
Fat	Pancreas	272.1	Hyperlipidemia	0.12	0.024	4e-7	1739	26130
Fat	Pancreas	496	Chronic airway obstruction	0.25	0.053	2.1e-6	283	27586
Fat	Pancreas	250	Diabetes mellitus	0.16	0.034	2.3e-6	754	27115
Fat	Pancreas	530.1	Esophagitis, GERD and related diseases	0.11	0.024	2.9e-6	1969	25900
Fat	Pancreas	530	Diseases of esophagus	0.11	0.023	3.2e-6	2091	25778
Fat	Pancreas	306	Other mental disorder	0.12	0.026	3.3e-6	1533	26336
Fat	Pancreas	272.11	Hypercholesterolemia	0.11	0.025	7.1e-6	1611	26258
Fat	Pancreas	562	Diverticulosis and diverticulitis	0.11	0.025	1.6e-5	1755	26114
Fat	Pancreas	562.1	Diverticulosis	0.11	0.025	1.6e-5	1755	26114
Fat	Pancreas	411	Ischemic Heart Disease	0.12	0.027	1.6e-5	1337	26532
Fat	Pancreas	433.31	Transient cerebral ischemia	0.34	0.084	4.5e-5	89	27780
Fat	Pancreas	433.3	Cerebral ischemia	0.32	0.078	5.2e-5	106	27763
Iron	Liver	250	Diabetes mellitus	-0.43	0.048	3.1e-19	1088	36358
Iron	Liver	250.2	Type 2 diabetes	-0.43	0.049	1.9e-18	1026	36420
Iron	Liver	550	Abdominal hernia	-0.16	0.021	6.6e-15	3940	33506
Iron	Liver	280	Iron deficiency anemias	-0.44	0.064	5.3e-12	639	36807
Iron	Liver	280.1	Iron deficiency anemias, unspecified or not due to blood loss	-0.44	0.065	8.9e-12	612	36834
Iron	Liver	204.2	Myeloid leukemia	0.32	0.05	1.4e-10	21	37425
Iron	Liver	530	Diseases of esophagus	-0.15	0.024	3.5e-10	2968	34478
Iron	Liver	550.2	Diaphragmatic hernia	-0.18	0.028	5.1e-10	2277	35169
Iron	Liver	530.1	Esophagitis, GERD and related diseases	-0.16	0.025	6.4e-10	2787	34659
Iron	Liver	411	Ischemic Heart Disease	-0.15	0.029	2.1e-7	1900	35546
Iron	Liver	211	Benign neoplasm of other parts of digestive system	-0.34	0.067	4.1e-7	504	36942
Iron	Liver	600	Hyperplasia of prostate	-0.19	0.038	6.5e-7	1048	36398
Iron	Liver	134	Helminthiases	0.3	0.059	6.6e-7	20	37426
Iron	Liver	411.4	Coronary atherosclerosis	-0.17	0.036	1.7e-6	1233	36213
Iron	Liver	550.1	Inguinal hernia	-0.15	0.032	2e-6	1461	35985
Iron	Liver	204	Leukemia	0.21	0.044	2.1e-6	81	37365
Iron	Liver	564.9	Personal history of diseases of digestive system	-0.17	0.037	5.2e-6	1241	36205
Iron	Liver	411.3	Angina pectoris	-0.19	0.042	5.4e-6	945	36501
Iron	Liver	202.2	Non-Hodgkins lymphoma	0.19	0.042	5.5e-6	115	37331
Iron	Liver	535	Gastritis and duodenitis	-0.11	0.025	5.6e-6	2605	34841
Iron	Liver	564	Functional digestive disorders	-0.14	0.03	6.7e-6	1823	35623
Iron	Liver	274.21	Chondrocalcinosis	0.24	0.053	8.4e-6	43	37403
Iron	Liver	401	Hypertension	-0.077	0.017	1e-5	5179	32267
Iron	Liver	401.1	Essential hypertension	-0.076	0.017	1.3e-5	5168	32278
Iron	Liver	350.1	Abnormal involuntary movements	0.24	0.056	1.5e-5	38	37408
Iron	Liver	274.2	Crystal arthropathies	0.23	0.054	2.3e-5	47	37399
Iron	Liver	202	Cancer of other lymphoid, histiocytic tissue	0.17	0.042	3.2e-5	148	37298
Iron	Liver	272.11	Hypercholesterolemia	-0.1	0.025	4.9e-5	2280	35166
Iron	Liver	250.1	Type 1 diabetes	-0.64	0.16	5.2e-5	108	37338
Iron	Pancreas	741.2	Stiffness of joint	0.36	0.075	1.5e-6	34	27835
Iron	Pancreas	008	Intestinal infection	0.23	0.053	1.8e-5	182	27687

## Sheet: File 1d Significant PHESANT ass
Trait	Organ	UK Biobank Field	Description	Category	Subcategory	model	beta	lower	upper	pvalue	n	n_cases	n_controls
Volume	Liver	30870	Triglycerides	Biological samples	Cardiovascular	LINEAR	0.247	0.233	0.262	1.19e-242	36157	NA	NA
Volume	Liver	30830	SHBG	Biological samples	Cancer	LINEAR	-0.216	-0.23	-0.203	3.43e-210	32708	NA	NA
Volume	Liver	23110	L arm	Physical Measures	Impedance	LINEAR	-0.123	-0.132	-0.114	6.23e-148	38198	NA	NA
Volume	Liver	23109	R arm	Physical Measures	Impedance	LINEAR	-0.12	-0.13	-0.111	2.17e-142	38196	NA	NA
Volume	Liver	23106	Whole body	Physical Measures	Impedance	LINEAR	-0.119	-0.129	-0.11	6.81e-133	38200	NA	NA
Volume	Liver	23122	R arm pred. mass	Physical Measures	Impedance	LINEAR	0.0748	0.0688	0.0808	1.41e-131	38184	NA	NA
Volume	Liver	23121	R arm FF mass	Physical Measures	Impedance	LINEAR	0.0739	0.0679	0.0799	7.02e-128	38184	NA	NA
Volume	Liver	30700	Creatinine	Biological samples	Renal	LINEAR	-0.142	-0.154	-0.129	5.99e-112	36163	NA	NA
Volume	Liver	23101	Whole body FF mass	Physical Measures	Impedance	LINEAR	0.0614	0.0559	0.0669	9.93e-105	38202	NA	NA
Volume	Liver	23102	Whole body water mass	Physical Measures	Impedance	LINEAR	0.0615	0.0559	0.0671	1.67e-103	38202	NA	NA
Volume	Liver	23126	Arm predicted mass (left)	Physical Measures	Impedance	LINEAR	0.0653	0.0594	0.0713	6.13e-103	38178	NA	NA
Volume	Liver	30600	Albumin	Biological samples	Liver	LINEAR	0.178	0.162	0.194	4.44e-102	33034	NA	NA
Volume	Liver	23129	Trunk fat-free mass	Physical Measures	Impedance	LINEAR	0.0657	0.0597	0.0718	1.19e-99	38156	NA	NA
Volume	Liver	23130	Trunk predicted mass	Physical Measures	Impedance	LINEAR	0.0658	0.0597	0.0718	1.63e-99	38153	NA	NA
Volume	Liver	30300	HLSRC	Biological samples	Red blood cells	LINEAR	0.158	0.143	0.172	2.35e-97	36184	NA	NA
Volume	Liver	30620	ALT	Biological samples	Liver	LINEAR	0.152	0.138	0.167	4.06e-97	36177	NA	NA
Volume	Liver	23125	Arm fat-free mass (left)	Physical Measures	Impedance	LINEAR	0.0634	0.0575	0.0693	4.4e-97	38180	NA	NA
Volume	Liver	30250	RC	Biological samples	Red blood cells	LINEAR	0.157	0.142	0.172	7.23e-96	36184	NA	NA
Volume	Liver	30290	High light scatter reticulocyte percentage	Biological samples	Red blood cells	LINEAR	0.158	0.143	0.173	1.94e-94	36185	NA	NA
Volume	Liver	30240	Reticulocyte percentage	Biological samples	Red blood cells	LINEAR	0.159	0.144	0.174	3.77e-94	36185	NA	NA
Volume	Liver	23105	Basal metabolic rate	Physical Measures	Impedance	LINEAR	0.0502	0.0451	0.0553	2.44e-82	38201	NA	NA
Volume	Liver	30750	HbA1c	Biological samples	Diabetes	LINEAR	0.148	0.133	0.163	2.18e-81	35925	NA	NA
Volume	Liver	30730	GGT	Biological samples	Liver	LINEAR	0.137	0.123	0.151	1.82e-80	36164	NA	NA
Volume	Liver	30850	Testosterone	Biological samples	Cancer	LINEAR	-0.0958	-0.106	-0.0859	1.03e-79	33198	NA	NA
Volume	Liver	2443	Diabetes	Medical history	Health and medical history	LOGISTIC-BINARY	0.662	0.59	0.733	1.61e-74	38619	1024	37595
Volume	Liver	20003#1140884600	Metformin	Medical history	Medications	LOGISTIC-BINARY	0.789	0.7	0.879	3.56e-67	38674	525	38149
Volume	Liver	20116-0	Smoking status	Lifestyle and History	Lifestyle and environment	MULTINOMIAL-LOGISTIC	NA	NA	NA	6.01e-65	NA	NA	NA
Volume	Liver	1558	Alcohol freq.	Lifestyle and History	Lifestyle and environment	ORDERED-LOGISTIC	-0.241	-0.269	-0.213	2.06e-62	38661	NA	NA
Volume	Liver	23127	Trunk fat percentage	Physical Measures	Impedance	LINEAR	-0.0856	-0.0957	-0.0755	9.66e-62	38167	NA	NA
Volume	Liver	30740	Glucose	Biological samples	Diabetes	LINEAR	0.135	0.119	0.152	3.29e-58	32992	NA	NA
Volume	Liver	30760	HDL cholesterol	Biological samples	Cardiovascular	LINEAR	-0.112	-0.126	-0.0983	6.31e-55	33022	NA	NA
Volume	Liver	30080	Platelet count	Biological samples	Platelets	LINEAR	0.121	0.105	0.136	5.35e-54	36820	NA	NA
Volume	Liver	30880	Urate	Biological samples	Renal	LINEAR	0.0954	0.0831	0.108	2.06e-52	36139	NA	NA
Volume	Liver	23114	Leg predicted mass (right)	Physical Measures	Impedance	LINEAR	0.0444	0.0387	0.0502	7.36e-52	38195	NA	NA
Volume	Liver	23113	Leg fat-free mass (right)	Physical Measures	Impedance	LINEAR	0.0445	0.0387	0.0502	1.23e-51	38195	NA	NA
Volume	Liver	20416	Freq 6+ units alcohol	Online follow-up	Alcohol use	ORDERED-LOGISTIC	0.288	0.251	0.326	5.27e-51	24883	NA	NA
Volume	Liver	23117	Leg fat-free mass (left)	Physical Measures	Impedance	LINEAR	0.0423	0.0368	0.0479	1.61e-50	38190	NA	NA
Volume	Liver	23118	Leg predicted mass (left)	Physical Measures	Impedance	LINEAR	0.0422	0.0367	0.0477	1.76e-50	38190	NA	NA
Volume	Liver	23099	Body fat %	Physical Measures	Impedance	LINEAR	-0.0582	-0.0659	-0.0504	1.06e-48	38184	NA	NA
Volume	Liver	49	Hip circumference	Physical Measures	Body size measures	LINEAR	-0.0699	-0.0794	-0.0604	2.93e-47	38649	NA	NA
Volume	Liver	1249	Past tobacco smoking	Lifestyle and History	Lifestyle and environment	ORDERED-LOGISTIC	-0.221	-0.251	-0.191	5.42e-47	37033	NA	NA
Volume	Liver	23107	R leg	Physical Measures	Impedance	LINEAR	-0.0844	-0.0961	-0.0726	3.78e-45	38201	NA	NA
Volume	Liver	30680	Calcium	Biological samples	Bone and joint	LINEAR	0.12	0.103	0.136	4.08e-45	33034	NA	NA
Volume	Liver	20403	Alchohol/day	Online follow-up	Alcohol use	ORDERED-LOGISTIC	0.268	0.231	0.306	1.49e-43	24847	NA	NA
Volume	Liver	23108	L leg	Physical Measures	Impedance	LINEAR	-0.083	-0.0949	-0.0712	6.22e-43	38199	NA	NA
Volume	Liver	30090	Platelet crit	Biological samples	Platelets	LINEAR	0.104	0.0889	0.119	4.99e-42	36820	NA	NA
Volume	Liver	20414	Freq alcohol	Online follow-up	Alcohol use	ORDERED-LOGISTIC	0.244	0.208	0.279	1.26e-41	26770	NA	NA
Volume	Liver	23119	Arm fat percentage (right)	Physical Measures	Impedance	LINEAR	-0.0507	-0.0582	-0.0433	1.68e-40	38188	NA	NA
Volume	Liver	23123	Arm fat percentage (left)	Physical Measures	Impedance	LINEAR	-0.0495	-0.0568	-0.0421	7.73e-40	38184	NA	NA
Volume	Liver	1498	Coffee intake	Lifestyle and History	Lifestyle and environment	ORDERED-LOGISTIC	0.207	0.176	0.238	1.42e-39	35578	NA	NA
Volume	Liver	20160	Ever smoked	Lifestyle and History	Lifestyle and environment	LOGISTIC-BINARY	0.216	0.183	0.249	3.34e-38	38594	21998	16596
Volume	Liver	2149	Lifetime number of sexual partners	Lifestyle and History	Lifestyle and environment	ORDERED-LOGISTIC	0.213	0.181	0.245	3.84e-38	33786	NA	NA
Volume	Liver	21034	Frequency of loose/mushy/watery stools in the last 3 months	Online follow-up	Digestive health	ORDERED-LOGISTIC	0.213	0.18	0.247	2.03e-35	30149	NA	NA
Volume	Liver	22506-114	Tobacco smoking	Online follow-up	Medical information	MULTINOMIAL-LOGISTIC	NA	NA	NA	6.71e-33	NA	NA	NA
Volume	Liver	2040	Risk taking	Lifestyle and History	Psychosocial factors	LOGISTIC-BINARY	0.208	0.174	0.243	1.79e-32	37525	10672	26853
Volume	Liver	30120	Lymphocyte count	Biological samples	White blood cells	LINEAR	0.0932	0.0776	0.109	7.01e-32	36762	NA	NA
Volume	Liver	25005	Volume of grey matter (normalised for head size)	Physical Measures	Brain MRI	LINEAR	-0.094	-0.11	-0.0781	9.74e-31	19592	NA	NA
Volume	Liver	1239	Current tobacco smoking	Lifestyle and History	Lifestyle and environment	ORDERED-LOGISTIC	0.324	0.269	0.379	1.35e-30	38660	NA	NA
Volume	Liver	30260	Mean reticulocyte volume	Biological samples	Red blood cells	LINEAR	-0.0933	-0.109	-0.0774	1.68e-30	36185	NA	NA
Volume	Liver	20453	Ever taken cannabis	Online follow-up	Cannabis use	ORDERED-LOGISTIC	0.258	0.214	0.302	1.73e-30	26759	NA	NA
Volume	Liver	21044	Average number of times bowels opened per day	Online follow-up	Digestive health	ORDERED-LOGISTIC	0.213	0.176	0.25	1.3e-29	29982	NA	NA
Volume	Liver	20003#1140874744	Glicazide	Medical history	Medications	LOGISTIC-BINARY	0.797	0.656	0.937	9.27e-29	38674	168	38506
Volume	Liver	1528	Water intake	Lifestyle and History	Lifestyle and environment	ORDERED-LOGISTIC	0.175	0.144	0.205	9.85e-29	35290	NA	NA
Volume	Liver	25001	Volume of peripheral cortical grey matter (normalised for head size)	Physical Measures	Brain MRI	LINEAR	-0.0933	-0.11	-0.0768	2.75e-28	19592	NA	NA
Volume	Liver	30280	Immature reticulocyte fraction	Biological samples	Red blood cells	LINEAR	0.0858	0.0703	0.101	1.59e-27	36185	NA	NA
Volume	Liver	1458	Cereal intake	Lifestyle and History	Lifestyle and environment	ORDERED-LOGISTIC	-0.164	-0.194	-0.134	4.8e-27	37014	NA	NA
Volume	Liver	30640	Apolipoprotein B	Biological samples	Cardiovascular	LINEAR	0.0876	0.0716	0.103	5.07e-27	36010	NA	NA
Volume	Liver	48	Waist circumference	Physical Measures	Body size measures	LINEAR	0.045	0.0368	0.0532	5.4e-27	38648	NA	NA
Volume	Liver	20405-0	"Ever had known person concerned about, or recommend reduction of, alcohol consumption"	Online follow-up	Alcohol use	MULTINOMIAL-LOGISTIC	NA	NA	NA	2.22e-26	NA	NA	NA
Volume	Liver	12679	Number of beats in waveform average for PWA	Physical Measures	Heart MRI	LINEAR	0.087	0.0706	0.103	1.89e-25	33879	NA	NA
Volume	Liver	30270	MSCV	Biological samples	Red blood cells	LINEAR	-0.0829	-0.0987	-0.0671	8.58e-25	36185	NA	NA
Volume	Liver	1508-2	Coffee type	Lifestyle and History	Lifestyle and environment	MULTINOMIAL-LOGISTIC	NA	NA	NA	1.85e-24	NA	NA	NA
Volume	Liver	21042	Greatest number of times bowels opened per day	Online follow-up	Digestive health	ORDERED-LOGISTIC	0.178	0.144	0.213	2.19e-24	30088	NA	NA
Volume	Liver	6164#3	Recent strenuous sports	Lifestyle and History	Lifestyle and environment	LOGISTIC-BINARY	0.229	0.185	0.273	2.67e-24	38127	5653	32474
Volume	Liver	30810	Phosphate	Biological samples	Renal	LINEAR	0.0832	0.067	0.0993	4.98e-24	32983	NA	NA
Volume	Liver	23128	Trunk fat mass	Physical Measures	Impedance	LINEAR	-0.0472	-0.0565	-0.038	1.33e-23	38164	NA	NA
Volume	Liver	22040	Summed MET minutes per week for all activity	Lifestyle and History	Lifestyle and environment	LINEAR	0.0849	0.0682	0.101	1.81e-23	32885	NA	NA
Volume	Liver	12336	Ventricular rate	Physical Measures	ECG at rest	LINEAR	0.0784	0.0624	0.0943	5.71e-22	33695	NA	NA
Volume	Liver	22671	Mean carotid IMT (intima-medial thickness) at 120 degrees	Physical Measures	Carotid ultrasound	LINEAR	0.091	0.0724	0.11	8.16e-22	22733	NA	NA
Volume	Liver	22032	IPAQ activity group	Lifestyle and History	Lifestyle and environment	ORDERED-LOGISTIC	0.155	0.124	0.187	1.08e-21	32885	NA	NA
Volume	Liver	12340	QRS duration	Physical Measures	ECG at rest	LINEAR	0.0739	0.0587	0.0891	1.63e-21	33690	NA	NA
Volume	Liver	904	Number of days/week of vigorous physical activity 10+ minutes	Lifestyle and History	Lifestyle and environment	ORDERED-LOGISTIC	0.138	0.11	0.166	1.77e-21	37971	NA	NA
Volume	Liver	22672	Maximum carotid IMT (intima-medial thickness) at 120 degrees	Physical Measures	Carotid ultrasound	LINEAR	0.0896	0.0709	0.108	4.95e-21	22733	NA	NA
Volume	Liver	30000	White blood cell (leukocyte) count	Biological samples	White blood cells	LINEAR	0.0737	0.0582	0.0892	1.32e-20	36819	NA	NA
Volume	Liver	1568	Average weekly red wine intake	Lifestyle and History	Lifestyle and environment	ORDERED-LOGISTIC	0.161	0.127	0.195	1.74e-20	29406	NA	NA
Volume	Liver	2139	Age first had sexual intercourse	Lifestyle and History	Lifestyle and environment	LINEAR	-0.0729	-0.0883	-0.0574	2.95e-20	35828	NA	NA
Volume	Liver	22680	Mean carotid IMT (intima-medial thickness) at 240 degrees	Physical Measures	Carotid ultrasound	LINEAR	0.0886	0.0698	0.107	3.18e-20	22572	NA	NA
Volume	Liver	20546#4	Substances taken for depression: Drugs or alcohol (more than once)	Online follow-up	Depression	LOGISTIC-BINARY	0.298	0.234	0.361	3.29e-20	26677	1887	24790
Volume	Liver	22033	Summed days activity	Lifestyle and History	Lifestyle and environment	LINEAR	0.0767	0.0602	0.0931	6.34e-20	33698	NA	NA
Volume	Liver	22681	Maximum carotid IMT (intima-medial thickness) at 240 degrees	Physical Measures	Carotid ultrasound	LINEAR	0.0873	0.0684	0.106	1.35e-19	22572	NA	NA
Volume	Liver	136	"Number of operations, self-reported"	Medical history	Operations	ORDERED-LOGISTIC	0.129	0.101	0.157	1.64e-19	38667	NA	NA
Volume	Liver	6150#4	High blood pressure	Medical history	Health and medical history	LOGISTIC-BINARY	0.17	0.133	0.208	9.5e-19	38635	7691	30944
Volume	Liver	25031	R putamen T2*	Physical Measures	Brain MRI	LINEAR	-0.0996	-0.122	-0.0775	1.17e-18	18120	NA	NA
Volume	Liver	25004	Volume of ventricular cerebrospinal fluid	Physical Measures	Brain MRI	LINEAR	0.078	0.0602	0.0959	1.13e-17	19592	NA	NA
Volume	Liver	1110	Length of mobile phone use	Lifestyle and History	Lifestyle and environment	ORDERED-LOGISTIC	0.127	0.0979	0.156	1.69e-17	38470	NA	NA
Volume	Liver	30720	Cystatin C	Biological samples	Renal	LINEAR	-0.0601	-0.074	-0.0462	2.63e-17	36180	NA	NA
Volume	Liver	21031	Stools looser when abdominal discomfort/pain started	Online follow-up	Digestive health	ORDERED-LOGISTIC	0.191	0.146	0.235	3.88e-17	15720	NA	NA
Volume	Liver	6162#4	Types of transport used (excluding work): Cycle	Lifestyle and History	Lifestyle and environment	LOGISTIC-BINARY	0.24	0.183	0.296	5.58e-17	38128	3246	34882
Volume	Liver	1120	Weekly usage of mobile phone in last 3 months	Lifestyle and History	Lifestyle and environment	ORDERED-LOGISTIC	0.128	0.0979	0.158	5.86e-17	33021	NA	NA
Volume	Liver	22034	Summed minutes activity	Lifestyle and History	Lifestyle and environment	LINEAR	0.0708	0.0541	0.0875	8.94e-17	32885	NA	NA
Volume	Liver	12698	Diastolic brachial blood pressure	Physical Measures	Heart MRI	LINEAR	0.0679	0.0518	0.084	1.41e-16	34022	NA	NA
Volume	Liver	30650	Aspartate aminotransferase	Biological samples	Liver	LINEAR	0.0637	0.0486	0.0789	1.65e-16	36039	NA	NA
Volume	Liver	884	Number of days/week of moderate physical activity 10+ minutes	Lifestyle and History	Lifestyle and environment	ORDERED-LOGISTIC	0.117	0.0888	0.144	2.14e-16	37745	NA	NA
Volume	Liver	25035	Median T2star in hippocampus (right)	Physical Measures	Brain MRI	LINEAR	-0.0875	-0.108	-0.0664	3.79e-16	18120	NA	NA
Volume	Liver	1428-3	Spread type	Lifestyle and History	Lifestyle and environment	MULTINOMIAL-LOGISTIC	NA	NA	NA	5.81e-16	NA	NA	NA
Volume	Liver	12687	Mean arterial pressure during PWA	Physical Measures	Heart MRI	LINEAR	0.0664	0.0502	0.0826	9.98e-16	33664	NA	NA
Volume	Liver	1100	Drive faster than motorway speed limit	Lifestyle and History	Lifestyle and environment	ORDERED-LOGISTIC	0.121	0.0908	0.151	3.01e-15	36631	NA	NA
Volume	Liver	25030	L putamen T2*	Physical Measures	Brain MRI	LINEAR	-0.0883	-0.11	-0.0663	3.72e-15	18120	NA	NA
Volume	Liver	100001	Food weight	Online follow-up	Estimated nutrients yesterday	LINEAR	0.162	0.121	0.202	5.25e-15	5729	NA	NA
Volume	Liver	30500	Microalbumin in urine	Biological samples	Renal (urine)	LINEAR	0.106	0.0792	0.133	9.51e-15	9647	NA	NA
Volume	Liver	22670	Minimum carotid IMT (intima-medial thickness) at 120 degrees	Physical Measures	Carotid ultrasound	LINEAR	0.0753	0.0562	0.0943	9.86e-15	22733	NA	NA
Volume	Liver	30190	Monocyte percentage	Biological samples	White blood cells	LINEAR	-0.0605	-0.0758	-0.0452	1e-14	36763	NA	NA
Volume	Liver	25034	Median T2star in hippocampus (left)	Physical Measures	Brain MRI	LINEAR	-0.0833	-0.104	-0.0621	1.32e-14	18120	NA	NA
Volume	Liver	22679	Minimum carotid IMT (intima-medial thickness) at 240 degrees	Physical Measures	Carotid ultrasound	LINEAR	0.076	0.0566	0.0953	1.45e-14	22572	NA	NA
Volume	Liver	22039	Vigorous activity	Lifestyle and History	Lifestyle and environment	ORDERED-LOGISTIC	0.123	0.0916	0.154	1.57e-14	32885	NA	NA
Volume	Liver	22674	Mean carotid IMT (intima-medial thickness) at 150 degrees	Physical Measures	Carotid ultrasound	LINEAR	0.0727	0.0542	0.0913	1.61e-14	22816	NA	NA
Volume	Liver	22035	Above moderate/vigorous recommendation	Lifestyle and History	Lifestyle and environment	LOGISTIC-BINARY	0.134	0.0994	0.168	1.77e-14	32885	17759	15126
Volume	Liver	25003	Volume of ventricular cerebrospinal fluid (normalised for head size)	Physical Measures	Brain MRI	LINEAR	0.0717	0.0533	0.0901	2.15e-14	19592	NA	NA
Volume	Liver	2159	Ever had same-sex intercourse	Lifestyle and History	Lifestyle and environment	LOGISTIC-BINARY	0.277	0.205	0.347	2.46e-14	36628	1436	35192
Volume	Liver	12684	End systolic pressure index during PWA	Physical Measures	Heart MRI	LINEAR	0.0637	0.0472	0.0803	4.35e-14	33073	NA	NA
Volume	Liver	30060	MCH concentration	Biological samples	Red blood cells	LINEAR	0.0603	0.0446	0.0759	4.42e-14	36818	NA	NA
Volume	Liver	1060	Time spent outdoors in winter	Lifestyle and History	Lifestyle and environment	ORDERED-LOGISTIC	0.128	0.0944	0.161	6.19e-14	29128	NA	NA
Volume	Liver	1488	Tea intake	Lifestyle and History	Lifestyle and environment	LINEAR	-0.0605	-0.0763	-0.0447	6.46e-14	37255	NA	NA
Volume	Liver	21029	More frequent bowel movements when abdominal discomfort/pain started	Online follow-up	Digestive health	ORDERED-LOGISTIC	0.173	0.128	0.218	6.7e-14	15728	NA	NA
Volume	Liver	12654	Number of automated diagnostic comments recorded during 12-lead ECG	Physical Measures	ECG at rest	ORDERED-LOGISTIC	0.115	0.0852	0.146	7.44e-14	33667	NA	NA
Volume	Liver	22677	Mean carotid IMT (intima-medial thickness) at 210 degrees	Physical Measures	Carotid ultrasound	LINEAR	0.0715	0.0527	0.0902	8.29e-14	22743	NA	NA
Volume	Liver	20413	Frequency of inability to cease drinking in last year	Online follow-up	Alcohol use	ORDERED-LOGISTIC	0.277	0.204	0.35	1.02e-13	15721	NA	NA
Volume	Liver	4080	"Systolic blood pressure, automated reading"	Physical Measures	Blood pressure	LINEAR	0.0554	0.0408	0.07	1.09e-13	36318	NA	NA
Volume	Liver	1070	Time spent watching TV	Lifestyle and History	Lifestyle and environment	ORDERED-LOGISTIC	-0.108	-0.137	-0.0794	1.41e-13	35925	NA	NA
Volume	Liver	6150#100	Vascular/heart problems	Medical history	Health and medical history	LOGISTIC-BINARY	-0.14	-0.177	-0.103	1.82e-13	38635	30316	8319
Volume	Liver	22038	MET minutes per week for moderate activity	Lifestyle and History	Lifestyle and environment	LINEAR	0.0623	0.0457	0.0789	2.07e-13	32885	NA	NA
Volume	Liver	22678	Maximum carotid IMT (intima-medial thickness) at 210 degrees	Physical Measures	Carotid ultrasound	LINEAR	0.0705	0.0517	0.0893	2.12e-13	22743	NA	NA
Volume	Liver	25036	Median T2star in amygdala (left)	Physical Measures	Brain MRI	LINEAR	-0.0811	-0.103	-0.0594	2.61e-13	18120	NA	NA
Volume	Liver	6144#4	"Never eat eggs, dairy, wheat, sugar": Sugar or foods/drinks containing sugar	Lifestyle and History	Lifestyle and environment	LOGISTIC-BINARY	0.156	0.114	0.198	2.75e-13	38114	5842	32272
Volume	Liver	25037	Median T2star in amygdala (right)	Physical Measures	Brain MRI	LINEAR	-0.0805	-0.102	-0.0588	3.73e-13	18120	NA	NA
Volume	Liver	22675	Maximum carotid IMT (intima-medial thickness) at 150 degrees	Physical Measures	Carotid ultrasound	LINEAR	0.0694	0.0507	0.0882	3.79e-13	22816	NA	NA
Volume	Liver	1379	Lamb/mutton intake	Lifestyle and History	Lifestyle and environment	ORDERED-LOGISTIC	0.111	0.0808	0.142	8.57e-13	38575	NA	NA
Volume	Liver	25009	"Volume of brain, grey+white matter (normalised for head size)"	Physical Measures	Brain MRI	LINEAR	-0.0647	-0.0824	-0.047	8.8e-13	19592	NA	NA
Volume	Liver	6139#3	Gas or solid-fuel cooking/heating: An open solid fuel fire that you use regularly in winter time	Lifestyle and History	Sociodemographics	LOGISTIC-BINARY	0.184	0.133	0.235	1.11e-12	38104	3968	34136
Volume	Liver	20549#4	Substances taken for anxiety: Drugs or alcohol (more than once)	Online follow-up	Anxiety	LOGISTIC-BINARY	0.264	0.19	0.336	1.2e-12	26702	1406	25296
Volume	Liver	30100	Mean platelet (thrombocyte) volume	Biological samples	Platelets	LINEAR	-0.0574	-0.0733	-0.0416	1.29e-12	36820	NA	NA
Volume	Liver	25029	L caudate T2*	Physical Measures	Brain MRI	LINEAR	-0.0796	-0.102	-0.0574	2.28e-12	18120	NA	NA
Volume	Liver	20004#1357	Operation code: hysterectomy	Medical history	Operations	LOGISTIC-BINARY	0.238	0.17	0.304	3.66e-12	38674	2881	35793
Volume	Liver	1160	Sleep duration	Lifestyle and History	Lifestyle and environment	ORDERED-LOGISTIC	-0.102	-0.131	-0.073	4.98e-12	38577	NA	NA
Volume	Liver	864	Number of days/week walked 10+ minutes	Lifestyle and History	Lifestyle and environment	ORDERED-LOGISTIC	0.1	0.0715	0.129	6.57e-12	38431	NA	NA
Volume	Liver	1299	Salad / raw vegetable intake	Lifestyle and History	Lifestyle and environment	ORDERED-LOGISTIC	0.112	0.0802	0.145	7.75e-12	36384	NA	NA
Volume	Liver	20408	Frequency of memory loss due to drinking alcohol in last year	Online follow-up	Alcohol use	ORDERED-LOGISTIC	0.232	0.165	0.299	1.28e-11	15732	NA	NA
Volume	Liver	23111	Leg fat percentage (right)	Physical Measures	Impedance	LINEAR	-0.0219	-0.0282	-0.0155	1.56e-11	38199	NA	NA
Volume	Liver	137	Number of treatments/medications taken	Medical history	Medications	ORDERED-LOGISTIC	0.102	0.0724	0.132	2.2e-11	38674	NA	NA
Volume	Liver	4079	"Diastolic blood pressure, automated reading"	Physical Measures	Blood pressure	LINEAR	0.0513	0.0362	0.0663	2.5e-11	36318	NA	NA
Volume	Liver	1588	Average weekly beer plus cider intake	Lifestyle and History	Lifestyle and environment	ORDERED-LOGISTIC	0.125	0.0878	0.162	3.53e-11	29425	NA	NA
Volume	Liver	20003#1140861954	Treatment/medication code: fenofibrate	Medical history	Medications	LOGISTIC-BINARY	0.949	0.654	1.22	3.55e-11	38674	36	38638
Volume	Liver	20401	Ever addicted to any substance or behaviour	Online follow-up	Addictions	LOGISTIC-BINARY	0.242	0.169	0.313	5.34e-11	26521	1487	25034
Volume	Liver	12683	End systolic pressure during PWA	Physical Measures	Heart MRI	LINEAR	0.0538	0.0377	0.0699	5.8e-11	33591	NA	NA
Volume	Liver	23100	Whole body fat mass	Physical Measures	Impedance	LINEAR	-0.0281	-0.0365	-0.0197	6.72e-11	38155	NA	NA
Volume	Liver	22676	Minimum carotid IMT (intima-medial thickness) at 210 degrees	Physical Measures	Carotid ultrasound	LINEAR	0.0637	0.0445	0.0829	7.53e-11	22743	NA	NA
Volume	Liver	6155#100	Vitamin and mineral supplements	Medical history	Health and medical history	LOGISTIC-BINARY	-0.113	-0.147	-0.079	8.06e-11	38077	26248	11829
Volume	Liver	12686	Stroke volume during PWA	Physical Measures	Heart MRI	LINEAR	-0.0518	-0.0675	-0.0361	1.03e-10	33109	NA	NA
Volume	Liver	20003#1140879802	Treatment/medication code: amlodipine	Medical history	Medications	LOGISTIC-BINARY	0.26	0.181	0.339	1.05e-10	38674	1027	37647
Volume	Liver	1468-3	Cereal type	Lifestyle and History	Lifestyle and environment	MULTINOMIAL-LOGISTIC	NA	NA	NA	1.47e-10	NA	NA	NA
Volume	Liver	2986	Started insulin within one year diagnosis of diabetes	Medical history	Health and medical history	LOGISTIC-BINARY	-1.06	-1.4	-0.747	1.51e-10	952	104	848
Volume	Liver	22037	MET minutes per week for walking	Lifestyle and History	Lifestyle and environment	LINEAR	0.0546	0.0379	0.0713	1.55e-10	32885	NA	NA
Volume	Liver	20521	Belittlement by partner or ex-partner as an adult	Online follow-up	Traumatic events	ORDERED-LOGISTIC	0.143	0.099	0.187	1.85e-10	26732	NA	NA
Volume	Liver	25028	Median T2star in caudate (left)	Physical Measures	Brain MRI	LINEAR	-0.0717	-0.0939	-0.0496	2.2e-10	18120	NA	NA
Volume	Liver	2188	Disability	Medical history	Health and medical history	LOGISTIC-BINARY	0.115	0.0791	0.15	2.34e-10	38049	9128	28921
Volume	Liver	767	Length of working week for main job	Lifestyle and History	Sociodemographics	LINEAR	0.056	0.0387	0.0733	2.36e-10	26306	NA	NA
Volume	Liver	20162	% life smoking	Lifestyle and History	Lifestyle and environment	LINEAR	0.089	0.0615	0.117	2.43e-10	9632	NA	NA
Volume	Liver	6143#4	Transport type for commuting to job workplace: Cycle	Lifestyle and History	Sociodemographics	LOGISTIC-BINARY	0.232	0.16	0.304	2.68e-10	24407	1999	22408
Volume	Liver	102	"Pulse rate, automated reading"	Physical Measures	Blood pressure	LINEAR	0.0501	0.0344	0.0658	3.73e-10	36318	NA	NA
Volume	Liver	30140	Neutrophill count	Biological samples	White blood cells	LINEAR	0.0499	0.0343	0.0655	4.04e-10	36762	NA	NA
Volume	Liver	22036	Above moderate/vigorous/walking recommendation	Lifestyle and History	Lifestyle and environment	LOGISTIC-BINARY	0.135	0.0928	0.178	4.25e-10	32885	26628	6257
Volume	Liver	6155#7	Vitamin and mineral supplements: Multivitamins +/- minerals	Medical history	Health and medical history	LOGISTIC-BINARY	0.119	0.0815	0.156	4.28e-10	38077	8552	29525
Volume	Liver	20409	Frequency of feeling guilt or remorse after drinking alcohol in last year	Online follow-up	Alcohol use	ORDERED-LOGISTIC	0.192	0.132	0.252	4.48e-10	15729	NA	NA
Volume	Liver	30110	PDW	Biological samples	Platelets	LINEAR	0.0499	0.0342	0.0656	5.01e-10	36820	NA	NA
Volume	Liver	6179#2	Mineral and other dietary supplements: Glucosamine	Medical history	Health and medical history	LOGISTIC-BINARY	0.125	0.0852	0.164	5.05e-10	38116	7879	30237
Volume	Liver	3637	Frequency of other exercises in last 4 weeks	Lifestyle and History	Lifestyle and environment	ORDERED-LOGISTIC	0.126	0.086	0.165	5.25e-10	21274	NA	NA
Volume	Liver	874	Duration of walks	Lifestyle and History	Lifestyle and environment	LINEAR	0.0525	0.0359	0.0691	5.58e-10	34023	NA	NA
Volume	Liver	738	Average total household income before tax	Lifestyle and History	Sociodemographics	ORDERED-LOGISTIC	0.0926	0.0631	0.122	7.37e-10	34927	NA	NA
Volume	Liver	30530	Sodium in urine	Biological samples	Renal (urine)	LINEAR	0.0466	0.0317	0.0615	8.48e-10	37378	NA	NA
Volume	Liver	12338	P duration	Physical Measures	ECG at rest	LINEAR	0.0521	0.0354	0.0689	1.09e-09	31864	NA	NA
Volume	Liver	1478	Salt added to food	Lifestyle and History	Lifestyle and environment	ORDERED-LOGISTIC	0.0938	0.0635	0.124	1.29e-09	38668	NA	NA
Volume	Liver	23115	Leg fat percentage (left)	Physical Measures	Impedance	LINEAR	-0.0192	-0.0254	-0.013	1.45e-09	38194	NA	NA
Volume	Liver	20479	Ever thought that life not worth living	Online follow-up	Self-harm behaviours	ORDERED-LOGISTIC	0.124	0.0836	0.164	1.52e-09	26646	NA	NA
Volume	Liver	2492	Taking other prescription medications	Medical history	Health and medical history	LOGISTIC-BINARY	0.0996	0.0672	0.132	1.7e-09	38608	14657	23951
Volume	Liver	6144#5	"Never eat eggs, dairy, wheat, sugar": I eat all of the above	Lifestyle and History	Lifestyle and environment	LOGISTIC-BINARY	-0.121	-0.161	-0.0816	1.82e-09	38114	31102	7012
Volume	Liver	20161	Pack years of smoking	Lifestyle and History	Lifestyle and environment	LINEAR	0.0837	0.0564	0.111	1.92e-09	9632	NA	NA
Volume	Liver	25879	Volume of grey matter in Thalamus (right)	Physical Measures	Brain MRI	LINEAR	0.0609	0.0408	0.0809	2.71e-09	19587	NA	NA
Volume	Liver	30770	IGF-1	Biological samples	Cancer	LINEAR	-0.0464	-0.0617	-0.031	3.11e-09	36002	NA	NA
Volume	Liver	6160#2	Leisure/social activities: Pub or social club	Lifestyle and History	Psychosocial factors	LOGISTIC-BINARY	0.105	0.0701	0.14	3.48e-09	38620	9982	28638
Volume	Liver	20516	Recent restlessness	Online follow-up	Anxiety	ORDERED-LOGISTIC	0.168	0.112	0.224	4.37e-09	26744	NA	NA
Volume	Liver	21043	Least number of times bowels opened per week	Online follow-up	Digestive health	ORDERED-LOGISTIC	0.101	0.0675	0.135	4.81e-09	29969	NA	NA
Volume	Liver	30630	Apolipoprotein A	Biological samples	Cardiovascular	LINEAR	-0.0441	-0.0588	-0.0293	4.97e-09	32850	NA	NA
Volume	Liver	30520	Potassium in urine	Biological samples	Renal (urine)	LINEAR	0.0458	0.0304	0.0613	5.54e-09	37355	NA	NA
Volume	Liver	21001	Body mass index (BMI)	Physical Measures	Body size measures	LINEAR	0.0217	0.0144	0.029	5.74e-09	38627	NA	NA
Volume	Liver	30150	Eosinophill count	Biological samples	White blood cells	ORDERED-LOGISTIC	0.088	0.0581	0.118	8e-09	36762	NA	NA
Volume	Liver	21002	Weight	Physical Measures	Body size measures	LINEAR	0.0166	0.0109	0.0222	8.58e-09	38632	NA	NA
Volume	Liver	6160#3	Leisure/social activities: Religious group	Lifestyle and History	Psychosocial factors	LOGISTIC-BINARY	-0.136	-0.183	-0.0897	9.66e-09	38620	5954	32666
Volume	Liver	1289	Cooked vegetable intake	Lifestyle and History	Lifestyle and environment	ORDERED-LOGISTIC	0.0868	0.0568	0.117	1.44e-08	37779	NA	NA
Volume	Liver	914	Duration of vigorous activity	Lifestyle and History	Lifestyle and environment	LINEAR	0.0594	0.0389	0.08	1.47e-08	23575	NA	NA
Volume	Liver	1727	Ease of skin tanning	Lifestyle and History	Lifestyle and environment	ORDERED-LOGISTIC	-0.0838	-0.113	-0.0548	1.55e-08	37452	NA	NA
Volume	Liver	30690	Cholesterol	Biological samples	Cardiovascular	LINEAR	0.0449	0.0291	0.0607	2.45e-08	36183	NA	NA
Volume	Liver	6179#100	Mineral and other dietary supplements	Medical history	Health and medical history	LOGISTIC-BINARY	-0.092	-0.124	-0.0595	2.87e-08	38116	21649	16467
Volume	Liver	1408	Cheese intake	Lifestyle and History	Lifestyle and environment	ORDERED-LOGISTIC	0.0821	0.053	0.111	3.04e-08	38018	NA	NA
Volume	Liver	20502	Ever had period extreme irritability	Online follow-up	Mania	LOGISTIC-BINARY	0.12	0.0777	0.163	3.41e-08	25992	6883	19109
Volume	Liver	20487	Felt hated by family member as a child	Online follow-up	Traumatic events	ORDERED-LOGISTIC	0.14	0.0898	0.19	4.14e-08	26728	NA	NA
Volume	Liver	6034	Target heart rate achieved	Physical Measures	ECG during exercise	LOGISTIC-BINARY	-0.464	-0.632	-0.299	4.87e-08	6160	544	5616
Volume	Liver	20515	Recent trouble relaxing	Online follow-up	Anxiety	ORDERED-LOGISTIC	0.115	0.0739	0.157	5.1e-08	26739	NA	NA
Volume	Liver	6145#6	"Illness, injury, bereavement, stress in last 2 years": Financial difficulties	Lifestyle and History	Psychosocial factors	LOGISTIC-BINARY	0.134	0.0852	0.182	6.27e-08	38078	3581	34497
Volume	Liver	100240	Coffee consumed	Online follow-up	Hot/cold beverages yesterday	LOGISTIC-BINARY	0.264	0.169	0.361	7.53e-08	5726	4068	1658
Volume	Liver	894	Duration of moderate activity	Lifestyle and History	Lifestyle and environment	ORDERED-LOGISTIC	0.0911	0.0579	0.124	8.11e-08	30252	NA	NA
Volume	Liver	100150	Drinking water intake	Online follow-up	Hot/cold beverages yesterday	ORDERED-LOGISTIC	0.198	0.125	0.27	9.85e-08	5726	NA	NA
Volume	Liver	6033	Maximum heart rate during fitness test	Physical Measures	ECG during exercise	LINEAR	-0.101	-0.138	-0.0632	1.42e-07	6160	NA	NA
Volume	Liver	22673	Minimum carotid IMT (intima-medial thickness) at 150 degrees	Physical Measures	Carotid ultrasound	LINEAR	0.0509	0.0319	0.0699	1.46e-07	22816	NA	NA
Volume	Liver	1269	Exposure to tobacco smoke at home	Lifestyle and History	Lifestyle and environment	ORDERED-LOGISTIC	0.194	0.122	0.267	1.63e-07	36739	NA	NA
Volume	Liver	21063	Ever been offered/sought treatment for depression	Online follow-up	Digestive health	LOGISTIC-BINARY	0.11	0.0687	0.152	1.98e-07	30079	7153	22926
Volume	Liver	20480	Ever self-harmed	Online follow-up	Self-harm behaviours	LOGISTIC-BINARY	0.23	0.142	0.316	2.02e-07	26728	1102	25626
Volume	Liver	1548	Variation in diet	Lifestyle and History	Lifestyle and environment	ORDERED-LOGISTIC	0.0831	0.0517	0.114	2.06e-07	38096	NA	NA
Volume	Liver	100270	Filtered coffee intake	Online follow-up	Hot/cold beverages yesterday	ORDERED-LOGISTIC	0.264	0.164	0.364	2.29e-07	5718	NA	NA
Volume	Liver	20546#3	Substances taken for depression: Medication prescribed to you (for at least two weeks)	Online follow-up	Depression	LOGISTIC-BINARY	0.115	0.0714	0.159	2.48e-07	26677	6225	20452
Volume	Liver	806	Job involves mainly walking or standing	Lifestyle and History	Sociodemographics	ORDERED-LOGISTIC	0.0893	0.0554	0.123	2.55e-07	26603	NA	NA
Volume	Liver	25033	Median T2star in pallidum (right)	Physical Measures	Brain MRI	LINEAR	-0.0593	-0.0819	-0.0367	2.69e-07	18120	NA	NA
Volume	Liver	4196	Pulse wave peak to peak time	Physical Measures	Arterial stiffness	LINEAR	-0.0681	-0.0941	-0.0421	2.8e-07	12802	NA	NA
Volume	Liver	21021	Pulse wave Arterial Stiffness index	Physical Measures	Arterial stiffness	LINEAR	0.0667	0.0412	0.0921	2.89e-07	12792	NA	NA
Volume	Liver	2744	Birth weight of first child	Lifestyle and History	Sex-specific factors	ORDERED-LOGISTIC	0.133	0.0817	0.184	3.84e-07	15483	NA	NA
Volume	Liver	2316	Wheeze in last year	Medical history	Health and medical history	LOGISTIC-BINARY	0.102	0.0627	0.142	3.89e-07	38152	6313	31839
Volume	Liver	12697	Systolic brachial blood pressure	Physical Measures	Heart MRI	LINEAR	0.0407	0.0249	0.0564	4.31e-07	34020	NA	NA
Volume	Liver	1538-0	Major dietary changes in the last 5 years	Lifestyle and History	Lifestyle and environment	MULTINOMIAL-LOGISTIC	NA	NA	NA	4.78e-07	NA	NA	NA
Volume	Liver	20507	Recent feelings of inadequacy	Online follow-up	Depression	ORDERED-LOGISTIC	0.119	0.0727	0.166	4.94e-07	26697	NA	NA
Volume	Liver	25781	Total volume of white matter hyperintensities (from T1 and T2_FLAIR images)	Physical Measures	Brain MRI	LINEAR	0.0486	0.0296	0.0675	5.04e-07	18540	NA	NA
Volume	Liver	20508	Recent trouble concentrating on things	Online follow-up	Depression	ORDERED-LOGISTIC	0.12	0.0732	0.167	5.1e-07	26771	NA	NA
Volume	Liver	20257	FVC Z-score	Physical Measures	Spirometry	LINEAR	-0.0431	-0.0599	-0.0262	5.38e-07	31781	NA	NA
Volume	Liver	21041	Degree to which abdominal pain/discomfort/altered bowel habits affect/interfere with life in general	Online follow-up	Digestive health	ORDERED-LOGISTIC	0.0861	0.0524	0.12	5.48e-07	30052	NA	NA
Volume	Liver	30180	Lymphocyte percentage	Biological samples	White blood cells	LINEAR	0.0398	0.0241	0.0556	6.83e-07	36763	NA	NA
Volume	Liver	20544#11	Mental health problems ever diagnosed by a professional: Depression	Online follow-up	Mental distress	LOGISTIC-BINARY	0.115	0.0693	0.16	6.85e-07	26673	5497	21176
Volume	Liver	6160#1	Leisure/social activities: Sports club or gym	Lifestyle and History	Psychosocial factors	LOGISTIC-BINARY	0.0823	0.0498	0.115	6.88e-07	38620	13933	24687
Volume	Liver	20003#1141177600	Treatment/medication code: rosiglitazone	Medical history	Medications	LOGISTIC-BINARY	0.698	0.409	0.964	7.04e-07	38674	31	38643
Volume	Liver	25008	Volume of white matter	Physical Measures	Brain MRI	LINEAR	0.0426	0.0258	0.0595	7.17e-07	19592	NA	NA
Volume	Liver	25878	Volume of grey matter in Thalamus (left)	Physical Measures	Brain MRI	LINEAR	0.0515	0.0311	0.0719	7.94e-07	19587	NA	NA
Volume	Liver	1050	Time spend outdoors in summer	Lifestyle and History	Lifestyle and environment	ORDERED-LOGISTIC	0.079	0.0475	0.11	8.62e-07	34873	NA	NA
Volume	Liver	20488	Physically abused by family as a child	Online follow-up	Traumatic events	ORDERED-LOGISTIC	0.111	0.0664	0.155	1.03e-06	26743	NA	NA
Volume	Liver	3143	Ankle spacing width	Physical Measures	Bone-densitometry of heel	LINEAR	0.0358	0.0213	0.0502	1.21e-06	20747	NA	NA
Volume	Liver	20499	Ever mental distress	Online follow-up	Mental distress	LOGISTIC-BINARY	0.0978	0.0582	0.137	1.27e-06	26718	10299	16419
Volume	Liver	1677	Breastfed as a baby	Lifestyle and History	Early life factors	LOGISTIC-BINARY	0.0997	0.0594	0.14	1.33e-06	30904	22382	8522
Volume	Liver	3647	Duration of other exercises	Lifestyle and History	Lifestyle and environment	ORDERED-LOGISTIC	0.0986	0.0586	0.139	1.39e-06	21287	NA	NA
Volume	Liver	6141#1	How are people in household related to participant: Husband, wife or partner	Lifestyle and History	Sociodemographics	LOGISTIC-BINARY	-0.0904	-0.127	-0.0534	1.59e-06	38559	29886	8673
Volume	Liver	22604#4	Work hours - lumped category	Online follow-up	Employment history	LOGISTIC-BINARY	0.107	0.0631	0.15	1.63e-06	21105	8698	12407
Volume	Liver	20485	Ever contemplated self-harm	Online follow-up	Self-harm behaviours	ORDERED-LOGISTIC	0.125	0.0741	0.177	1.64e-06	26713	NA	NA
Volume	Liver	21035	Currently (in last 3 months) suffer from abdominal pain	Online follow-up	Digestive health	LOGISTIC-BINARY	0.0972	0.057	0.137	2.14e-06	30115	8361	21754
Volume	Liver	2644	"Light smokers, at least 100 smokes in lifetime"	Lifestyle and History	Lifestyle and environment	LOGISTIC-BINARY	0.15	0.0875	0.212	2.4e-06	11219	4719	6500
Volume	Liver	2070	Frequency of tenseness / restlessness in last 2 weeks	Lifestyle and History	Psychosocial factors	ORDERED-LOGISTIC	0.0863	0.0503	0.122	2.66e-06	37728	NA	NA
Volume	Liver	20117-2	Alcohol drinker status	Lifestyle and History	Lifestyle and environment	MULTINOMIAL-LOGISTIC	NA	NA	NA	2.73e-06	NA	NA	NA
Volume	Liver	21025	Frequency of discomfort/pain in abdomen in last 3 months	Online follow-up	Digestive health	ORDERED-LOGISTIC	0.0793	0.0462	0.112	2.75e-06	30146	NA	NA
Volume	Liver	20509	Recent inability to stop or control worrying	Online follow-up	Anxiety	ORDERED-LOGISTIC	0.106	0.0617	0.151	3.02e-06	26717	NA	NA
Volume	Liver	1418-2	Milk type used	Lifestyle and History	Lifestyle and environment	MULTINOMIAL-LOGISTIC	NA	NA	NA	3.07e-06	NA	NA	NA
Volume	Liver	924	Usual walking pace	Lifestyle and History	Lifestyle and environment	ORDERED-LOGISTIC	0.0757	0.0439	0.108	3.17e-06	38610	NA	NA
Volume	Liver	46	Hand grip strength (left)	Physical Measures	Hand grip strength	LINEAR	0.0243	0.014	0.0345	3.36e-06	38570	NA	NA
Volume	Liver	1717	Skin colour	Lifestyle and History	Lifestyle and environment	ORDERED-LOGISTIC	0.0797	0.0461	0.113	3.47e-06	38374	NA	NA
Volume	Liver	981	Duration walking for pleasure	Lifestyle and History	Lifestyle and environment	ORDERED-LOGISTIC	0.0782	0.0452	0.111	3.51e-06	29078	NA	NA
Volume	Liver	20529-0	Victim of physically violent crime	Online follow-up	Traumatic events	MULTINOMIAL-LOGISTIC	NA	NA	NA	3.55e-06	NA	NA	NA
Volume	Liver	6155#3	Vitamin and mineral supplements: Vitamin C	Medical history	Health and medical history	LOGISTIC-BINARY	0.132	0.0758	0.188	3.75e-06	38077	3118	34959
Volume	Liver	1210	Snoring	Lifestyle and History	Lifestyle and environment	LOGISTIC-BINARY	-0.0804	-0.115	-0.0462	4e-06	36512	23229	13283
Volume	Liver	2020	"Loneliness, isolation"	Lifestyle and History	Psychosocial factors	LOGISTIC-BINARY	0.0996	0.0571	0.142	4.23e-06	38252	5573	32679
Volume	Liver	23120	Arm fat mass (right)	Physical Measures	Impedance	LINEAR	-0.0193	-0.0276	-0.0111	4.77e-06	38186	NA	NA
Volume	Liver	6155#2	Vitamin and mineral supplements: Vitamin B	Medical history	Health and medical history	LOGISTIC-BINARY	0.185	0.105	0.263	5.15e-06	38077	1465	36612
Volume	Liver	20489	Felt loved as a child	Online follow-up	Traumatic events	ORDERED-LOGISTIC	-0.0824	-0.118	-0.0469	5.59e-06	26723	NA	NA
Volume	Liver	1220	Daytime sleeping	Lifestyle and History	Lifestyle and environment	ORDERED-LOGISTIC	0.0875	0.0497	0.125	5.64e-06	38611	NA	NA
Volume	Liver	6164#2	Types of physical activity in last 4 weeks: Other exercises (eg: swimming, cycling, keep fit, bowling)	Lifestyle and History	Lifestyle and environment	LOGISTIC-BINARY	0.0736	0.0418	0.105	5.88e-06	38127	21422	16705
Volume	Liver	1598	Average weekly spirits intake	Lifestyle and History	Lifestyle and environment	ORDERED-LOGISTIC	0.0837	0.0473	0.12	6.44e-06	29374	NA	NA
Volume	Liver	6149#4	Mouth/teeth dental problems: Loose teeth	Medical history	Health and medical history	LOGISTIC-BINARY	0.185	0.103	0.265	7.05e-06	38111	1220	36891
Volume	Liver	20501	Ever had period of mania / excitability	Online follow-up	Mania	LOGISTIC-BINARY	0.188	0.105	0.27	7.7e-06	26152	1084	25068
Volume	Liver	1737	Childhood sunburn occasions	Lifestyle and History	Lifestyle and environment	ORDERED-LOGISTIC	0.0785	0.0441	0.113	7.74e-06	29202	NA	NA
Volume	Liver	3062	FVC	Physical Measures	Spirometry	LINEAR	0.0232	0.013	0.0333	7.83e-06	35719	NA	NA
Volume	Liver	20003#1140861958	Treatment/medication code: simvastatin	Medical history	Medications	LOGISTIC-BINARY	0.123	0.0683	0.176	8.9e-06	38674	2955	35719
Volume	Liver	20256	FEV1 Z-score	Physical Measures	Spirometry	LINEAR	-0.0386	-0.0556	-0.0216	8.94e-06	31781	NA	NA
Volume	Liver	23124	Arm fat mass (left)	Physical Measures	Impedance	LINEAR	-0.0188	-0.0271	-0.0105	9.13e-06	38181	NA	NA
Volume	Liver	20003#1141194794	Treatment/medication code: bendroflumethiazide	Medical history	Medications	LOGISTIC-BINARY	0.169	0.0937	0.243	9.38e-06	38674	1313	37361
Volume	Liver	991	Frequency of strenuous sports in last 4 weeks	Lifestyle and History	Lifestyle and environment	ORDERED-LOGISTIC	0.175	0.0976	0.253	1.01e-05	5588	NA	NA
Volume	Liver	30860	Total protein	Biological samples	Renal	LINEAR	0.0373	0.0207	0.0538	1.04e-05	32990	NA	NA
Volume	Liver	6179#1	Mineral and other dietary supplements: Fish oil (including cod liver oil)	Medical history	Health and medical history	LOGISTIC-BINARY	0.0773	0.0428	0.112	1.08e-05	38116	12105	26011
Volume	Liver	20003#1141192736	Treatment/medication code: ezetimibe	Medical history	Medications	LOGISTIC-BINARY	0.427	0.23	0.611	1.09e-05	38674	130	38544
Volume	Liver	20523	Physical violence by partner or ex-partner as an adult	Online follow-up	Traumatic events	ORDERED-LOGISTIC	0.126	0.0695	0.182	1.14e-05	26740	NA	NA
Volume	Liver	2306	Weight change compared with 1 year ago	Medical history	Health and medical history	ORDERED-LOGISTIC	-0.0705	-0.102	-0.039	1.17e-05	38233	NA	NA
Volume	Liver	2050	Frequency of depressed mood in last 2 weeks	Lifestyle and History	Psychosocial factors	ORDERED-LOGISTIC	0.0854	0.0472	0.124	1.18e-05	37567	NA	NA
Volume	Liver	20003#1141189090	Treatment/medication code: rosiglitazone 1mg / metformin 500mg tablet	Medical history	Medications	LOGISTIC-BINARY	1.04	0.556	1.49	1.22e-05	38674	11	38663
Volume	Liver	1920	Mood swings	Lifestyle and History	Psychosocial factors	LOGISTIC-BINARY	0.0715	0.0393	0.104	1.35e-05	38027	15559	22468
Volume	Liver	20003#1141152998	Treatment/medication code: irbesartan	Medical history	Medications	LOGISTIC-BINARY	0.325	0.175	0.469	1.35e-05	38674	238	38436
Volume	Liver	20498	Felt very upset when reminded of stressful experience in past month	Online follow-up	Traumatic events	ORDERED-LOGISTIC	0.0863	0.0474	0.125	1.38e-05	26760	NA	NA
Volume	Liver	100022	Alcohol	Online follow-up	Estimated nutrients yesterday	ORDERED-LOGISTIC	0.173	0.0948	0.252	1.54e-05	5729	NA	NA
Volume	Liver	20004#1355	Operation code: bilateral oophorectomy	Medical history	Operations	LOGISTIC-BINARY	0.202	0.11	0.293	1.58e-05	38674	1315	37359
Volume	Liver	100760	Breakfast cereal consumed	Online follow-up	Cereal yesterday	LOGISTIC-BINARY	-0.193	-0.281	-0.105	1.72e-05	5726	3939	1787
Volume	Liver	1259	Smoking/smokers in household	Lifestyle and History	Lifestyle and environment	ORDERED-LOGISTIC	0.118	0.0642	0.172	1.81e-05	36588	NA	NA
Volume	Liver	20151	"FVC, Best measure"	Physical Measures	Spirometry	LINEAR	0.0232	0.0126	0.0339	1.96e-05	29663	NA	NA
Volume	Pancreas	30720	Cystatin C	Biological samples	Renal	LINEAR	-0.0762	-0.0861	-0.0664	1.22e-51	34931	NA	NA
Volume	Pancreas	20003#1140883066	Insulin	Medical history	Medications	LOGISTIC-BINARY	-0.852	-0.979	-0.724	3.54e-39	37376	171	37205
Volume	Pancreas	30750	HbA1c	Biological samples	Diabetes	LINEAR	-0.0601	-0.0709	-0.0494	8.49e-28	34687	NA	NA
Volume	Pancreas	2188	Disability	Medical history	Health and medical history	LOGISTIC-BINARY	-0.143	-0.169	-0.117	7.5e-27	36776	8809	27967
Volume	Pancreas	30020	Heamoglobin conc.	Biological samples	Red blood cells	LINEAR	0.0441	0.0355	0.0526	5.56e-24	35561	NA	NA
Volume	Pancreas	23109	R arm	Physical Measures	Impedance	LINEAR	-0.0321	-0.0387	-0.0255	1.84e-21	36912	NA	NA
Volume	Pancreas	30030	Haematocrit percentage	Biological samples	Red blood cells	LINEAR	0.0425	0.0336	0.0513	4.11e-21	35560	NA	NA
Volume	Pancreas	21043	Least number of times bowels opened per week	Online follow-up	Digestive health	ORDERED-LOGISTIC	0.113	0.0893	0.136	6.19e-21	29018	NA	NA
Volume	Pancreas	23110	L arm	Physical Measures	Impedance	LINEAR	-0.0306	-0.0372	-0.024	1.33e-19	36914	NA	NA
Volume	Pancreas	2492	Taking other prescription medications	Medical history	Health and medical history	LOGISTIC-BINARY	-0.106	-0.129	-0.0825	5.14e-19	37312	14139	23173
Volume	Pancreas	2443	Diabetes	Medical history	Health and medical history	LOGISTIC-BINARY	-0.279	-0.341	-0.218	5.65e-19	37322	992	36330
Volume	Pancreas	30010	Red blood cell (erythrocyte) count	Biological samples	Red blood cells	LINEAR	0.0397	0.0305	0.0489	3.15e-17	35560	NA	NA
Volume	Pancreas	6154#5	"Medication for pain relief, constipation, heartburn": Omeprazole (e.g. Zanprol)	Medical history	Health and medical history	LOGISTIC-BINARY	-0.229	-0.282	-0.175	4.3e-17	36619	1514	35105
Volume	Pancreas	2178	Overall health rating	Medical history	Health and medical history	ORDERED-LOGISTIC	-0.0928	-0.115	-0.0707	1.81e-16	37312	NA	NA
Volume	Pancreas	2986	Started insulin within one year diagnosis of diabetes	Medical history	Health and medical history	LOGISTIC-BINARY	-0.996	-1.25	-0.76	7.76e-16	923	102	821
Volume	Pancreas	1558	Alcohol freq.	Lifestyle and History	Lifestyle and environment	ORDERED-LOGISTIC	-0.079	-0.0986	-0.0594	2.88e-15	37364	NA	NA
Volume	Pancreas	21033	Frequency of hard/lumpy stools in the last 3 months	Online follow-up	Digestive health	ORDERED-LOGISTIC	-0.0949	-0.119	-0.0709	9.36e-15	29193	NA	NA
Volume	Pancreas	924	Usual walking pace	Lifestyle and History	Lifestyle and environment	ORDERED-LOGISTIC	0.0886	0.0661	0.111	1.48e-14	37315	NA	NA
Volume	Pancreas	6146#100	Attendance/disability/mobility allowance	Lifestyle and History	Sociodemographics	LOGISTIC-BINARY	0.325	0.239	0.409	6.48e-14	37260	36713	547
Volume	Pancreas	20414	Freq alcohol	Online follow-up	Alcohol use	ORDERED-LOGISTIC	0.0908	0.0669	0.115	1.05e-13	25891	NA	NA
Volume	Pancreas	6146#3	Attendance/disability/mobility allowance: Blue badge	Lifestyle and History	Sociodemographics	LOGISTIC-BINARY	-0.399	-0.505	-0.293	1.53e-13	37260	325	36935
Volume	Pancreas	30770	IGF-1	Biological samples	Cancer	LINEAR	0.04	0.0291	0.0509	6.43e-13	34764	NA	NA
Volume	Pancreas	20256	FEV1 Z-score	Physical Measures	Spirometry	LINEAR	-0.0443	-0.0564	-0.0322	7.65e-13	30710	NA	NA
Volume	Pancreas	20257	FVC Z-score	Physical Measures	Spirometry	LINEAR	-0.0426	-0.0545	-0.0306	3.26e-12	30710	NA	NA
Volume	Pancreas	23122	R arm pred. mass	Physical Measures	Impedance	LINEAR	0.015	0.0107	0.0193	5.58e-12	36902	NA	NA
Volume	Pancreas	738	Average total household income before tax	Lifestyle and History	Sociodemographics	ORDERED-LOGISTIC	0.0729	0.0521	0.0937	6.32e-12	33728	NA	NA
Volume	Pancreas	21041	Degree to which abdominal pain/discomfort/altered bowel habits affect/interfere with life in general	Online follow-up	Digestive health	ORDERED-LOGISTIC	-0.0823	-0.106	-0.0587	7.84e-12	29097	NA	NA
Volume	Pancreas	20459	Happy with health	Online follow-up	Happiness and subjective well-being	ORDERED-LOGISTIC	-0.0864	-0.111	-0.0615	1.01e-11	25869	NA	NA
Volume	Pancreas	6146#2	Attendance/disability/mobility allowance: Disability living allowance	Lifestyle and History	Sociodemographics	LOGISTIC-BINARY	-0.344	-0.444	-0.244	1.45e-11	37260	391	36869
Volume	Pancreas	20003#1140865634	Treatment/medication code: omeprazole	Medical history	Medications	LOGISTIC-BINARY	-0.19	-0.246	-0.134	2.46e-11	37376	1375	36001
Volume	Pancreas	2473	Other serious medical condition/disability diagnosed by doctor	Medical history	Health and medical history	LOGISTIC-BINARY	-0.103	-0.133	-0.0724	2.63e-11	36901	5836	31065
Volume	Pancreas	23121	R arm FF mass	Physical Measures	Impedance	LINEAR	0.0143	0.01	0.0186	5.71e-11	36902	NA	NA
Volume	Pancreas	30710	C-reactive protein	Biological samples	Cardiovascular	LINEAR	-0.0343	-0.0447	-0.0239	9.4e-11	34863	NA	NA
Volume	Pancreas	20022	Birth weight	Lifestyle and History	Early life factors	LINEAR	0.0452	0.0315	0.0589	9.58e-11	22390	NA	NA
Volume	Pancreas	21040	Satisfaction with bowel habits	Online follow-up	Digestive health	ORDERED-LOGISTIC	-0.0718	-0.0937	-0.0499	1.25e-10	29092	NA	NA
Volume	Pancreas	20150	"Forced expiratory volume in 1-second (FEV1), Best measure"	Physical Measures	Spirometry	LINEAR	0.0268	0.0185	0.035	1.82e-10	28660	NA	NA
Volume	Pancreas	23106	Whole body	Physical Measures	Impedance	LINEAR	-0.0221	-0.0289	-0.0153	1.91e-10	36916	NA	NA
Volume	Pancreas	12684	End systolic pressure index during PWA	Physical Measures	Heart MRI	LINEAR	0.0373	0.0257	0.0488	2.28e-10	33047	NA	NA
Volume	Pancreas	3063	Forced expiratory volume in 1-second (FEV1)	Physical Measures	Spirometry	LINEAR	0.0245	0.0169	0.0322	2.86e-10	34498	NA	NA
Volume	Pancreas	30600	Albumin	Biological samples	Liver	LINEAR	0.0373	0.0257	0.0489	2.86e-10	31914	NA	NA
Volume	Pancreas	25012	Volume of thalamus (right)	Physical Measures	Brain MRI	LINEAR	0.0399	0.0274	0.0524	4.08e-10	19702	NA	NA
Volume	Pancreas	21060	Tired	Online follow-up	Digestive health	ORDERED-LOGISTIC	-0.0762	-0.1	-0.0523	4.48e-10	29205	NA	NA
Volume	Pancreas	25006	Volume of grey matter	Physical Measures	Brain MRI	LINEAR	0.0374	0.0254	0.0494	9.32e-10	19718	NA	NA
Volume	Pancreas	46	Hand grip strength (left)	Physical Measures	Hand grip strength	LINEAR	0.0223	0.0151	0.0296	1.65e-09	37275	NA	NA
Volume	Pancreas	25852	Volume of grey matter in Lingual Gyrus (left)	Physical Measures	Brain MRI	LINEAR	0.0399	0.0269	0.053	1.76e-09	19713	NA	NA
Volume	Pancreas	25011	Volume of thalamus (left)	Physical Measures	Brain MRI	LINEAR	0.0388	0.0262	0.0515	1.86e-09	19702	NA	NA
Volume	Pancreas	728	Number of vehicles in household	Lifestyle and History	Sociodemographics	ORDERED-LOGISTIC	0.0636	0.0427	0.0844	2.26e-09	37256	NA	NA
Volume	Pancreas	25887	Volume of grey matter in Hippocampus (right)	Physical Measures	Brain MRI	LINEAR	0.0416	0.0279	0.0553	2.57e-09	19713	NA	NA
Volume	Pancreas	20116-0	Smoking status	Lifestyle and History	Lifestyle and environment	MULTINOMIAL-LOGISTIC	NA	NA	NA	2.67e-09	NA	NA	NA
Volume	Pancreas	20151	"FVC, Best measure"	Physical Measures	Spirometry	LINEAR	0.023	0.0154	0.0306	2.83e-09	28660	NA	NA
Volume	Pancreas	25002	Volume of peripheral cortical grey matter	Physical Measures	Brain MRI	LINEAR	0.0365	0.0245	0.0486	3.02e-09	19718	NA	NA
Volume	Pancreas	23126	Arm predicted mass (left)	Physical Measures	Impedance	LINEAR	0.0123	0.00813	0.0166	9.88e-09	36897	NA	NA
Volume	Pancreas	1538-0	Major dietary changes in the last 5 years	Lifestyle and History	Lifestyle and environment	MULTINOMIAL-LOGISTIC	NA	NA	NA	1.03e-08	NA	NA	NA
Volume	Pancreas	47	Hand grip strength (right)	Physical Measures	Hand grip strength	LINEAR	0.0212	0.0139	0.0285	1.06e-08	37272	NA	NA
Volume	Pancreas	2080	Frequency of tiredness / lethargy in last 2 weeks	Lifestyle and History	Psychosocial factors	ORDERED-LOGISTIC	-0.0636	-0.0854	-0.0418	1.08e-08	36717	NA	NA
Volume	Pancreas	6164#100	Types of physical activity in last 4 weeks	Lifestyle and History	Lifestyle and environment	LOGISTIC-BINARY	-0.171	-0.23	-0.112	1.12e-08	36831	1259	35572
Volume	Pancreas	23125	Arm fat-free mass (left)	Physical Measures	Impedance	LINEAR	0.0123	0.00808	0.0165	1.16e-08	36898	NA	NA
Volume	Pancreas	3062	FVC	Physical Measures	Spirometry	LINEAR	0.0209	0.0137	0.0281	1.18e-08	34498	NA	NA
Volume	Pancreas	30640	Apolipoprotein B	Biological samples	Cardiovascular	LINEAR	0.0327	0.0214	0.044	1.41e-08	34772	NA	NA
Volume	Pancreas	904	Number of days/week of vigorous physical activity 10+ minutes	Lifestyle and History	Lifestyle and environment	ORDERED-LOGISTIC	0.0572	0.0374	0.077	1.47e-08	36692	NA	NA
Volume	Pancreas	25020	Volume of hippocampus (right)	Physical Measures	Brain MRI	LINEAR	0.0412	0.0269	0.0554	1.48e-08	19702	NA	NA
Volume	Pancreas	20416	Freq 6+ units alcohol	Online follow-up	Alcohol use	ORDERED-LOGISTIC	0.075	0.0491	0.101	1.51e-08	24062	NA	NA
Volume	Pancreas	25019	Volume of hippocampus (left)	Physical Measures	Brain MRI	LINEAR	0.0412	0.0269	0.0555	1.62e-08	19702	NA	NA
Volume	Pancreas	25886	Volume of grey matter in Hippocampus (left)	Physical Measures	Brain MRI	LINEAR	0.039	0.0253	0.0526	2.05e-08	19713	NA	NA
Volume	Pancreas	22039	Vigorous activity	Lifestyle and History	Lifestyle and environment	ORDERED-LOGISTIC	0.0625	0.0405	0.0846	2.76e-08	31747	NA	NA
Volume	Pancreas	3064	Peak expiratory flow (PEF)	Physical Measures	Spirometry	LINEAR	0.0252	0.0163	0.0341	3.02e-08	34498	NA	NA
Volume	Pancreas	30690	Cholesterol	Biological samples	Cardiovascular	LINEAR	0.0316	0.0204	0.0429	3.21e-08	34934	NA	NA
Volume	Pancreas	2976	Age diabetes diagnosed	Medical history	Health and medical history	LINEAR	0.117	0.0756	0.159	4.36e-08	925	NA	NA
Volume	Pancreas	21064	Sensitive stomach	Online follow-up	Digestive health	LOGISTIC-BINARY	-0.0902	-0.123	-0.0577	5.01e-08	26898	5612	21286
Volume	Pancreas	30670	Urea	Biological samples	Renal	LINEAR	-0.03	-0.0409	-0.0192	5.21e-08	34905	NA	NA
Volume	Pancreas	30780	LDL direct	Biological samples	Cardiovascular	LINEAR	0.0313	0.02	0.0426	6.17e-08	34861	NA	NA
Volume	Pancreas	6154#100	"Medication for pain relief, constipation, heartburn"	Medical history	Health and medical history	LOGISTIC-BINARY	0.0639	0.0407	0.0871	6.58e-08	36619	22727	13892
Volume	Pancreas	21034	Frequency of loose/mushy/watery stools in the last 3 months	Online follow-up	Digestive health	ORDERED-LOGISTIC	0.065	0.0413	0.0886	7.19e-08	29193	NA	NA
Volume	Pancreas	137	Number of treatments/medications taken	Medical history	Medications	ORDERED-LOGISTIC	-0.0576	-0.0786	-0.0366	7.78e-08	37376	NA	NA
Volume	Pancreas	25017	Volume of pallidum (left)	Physical Measures	Brain MRI	LINEAR	0.0384	0.0243	0.0525	8.94e-08	19702	NA	NA
Volume	Pancreas	25851	"Volume of grey matter in Parahippocampal Gyrus, posterior division (right)"	Physical Measures	Brain MRI	LINEAR	0.0391	0.0247	0.0535	1.09e-07	19713	NA	NA
Volume	Pancreas	25015	Volume of putamen (left)	Physical Measures	Brain MRI	LINEAR	0.035	0.0221	0.048	1.14e-07	19702	NA	NA
Volume	Pancreas	23127	Trunk fat percentage	Physical Measures	Impedance	LINEAR	-0.0193	-0.0265	-0.0121	1.35e-07	36886	NA	NA
Volume	Pancreas	20403	Alchohol/day	Online follow-up	Alcohol use	ORDERED-LOGISTIC	0.0703	0.044	0.0965	1.55e-07	24026	NA	NA
Volume	Pancreas	23123	Arm fat percentage (left)	Physical Measures	Impedance	LINEAR	-0.014	-0.0192	-0.00874	1.6e-07	36902	NA	NA
Volume	Pancreas	20528-0	Diagnosed with life-threatening illness	Online follow-up	Traumatic events	MULTINOMIAL-LOGISTIC	NA	NA	NA	1.69e-07	NA	NA	NA
Volume	Pancreas	23129	Trunk fat-free mass	Physical Measures	Impedance	LINEAR	0.0115	0.00717	0.0158	1.83e-07	36875	NA	NA
Volume	Pancreas	1249	Past tobacco smoking	Lifestyle and History	Lifestyle and environment	ORDERED-LOGISTIC	-0.0556	-0.0764	-0.0347	1.85e-07	35788	NA	NA
Volume	Pancreas	25853	Volume of grey matter in Lingual Gyrus (right)	Physical Measures	Brain MRI	LINEAR	0.0346	0.0215	0.0476	2.19e-07	19713	NA	NA
Volume	Pancreas	23130	Trunk predicted mass	Physical Measures	Impedance	LINEAR	0.0114	0.00708	0.0157	2.33e-07	36873	NA	NA
Volume	Pancreas	25801	"Volume of grey matter in Superior Temporal Gyrus, posterior division (right)"	Physical Measures	Brain MRI	LINEAR	0.0369	0.0228	0.0511	3.16e-07	19713	NA	NA
Volume	Pancreas	6148#1	Eye problems/disorders: Diabetes related eye disease	Medical history	Health and medical history	LOGISTIC-BINARY	-0.528	-0.729	-0.323	3.33e-07	12012	74	11938
Volume	Pancreas	25025	Volume of brain stem + 4th ventricle	Physical Measures	Brain MRI	LINEAR	0.0347	0.0213	0.048	3.48e-07	19702	NA	NA
Volume	Pancreas	2060	Frequency of unenthusiasm / disinterest in last 2 weeks	Lifestyle and History	Psychosocial factors	ORDERED-LOGISTIC	-0.0744	-0.103	-0.0457	4.06e-07	36619	NA	NA
Volume	Pancreas	6164#2	Types of physical activity in last 4 weeks: Other exercises (eg: swimming, cycling, keep fit, bowling)	Lifestyle and History	Lifestyle and environment	LOGISTIC-BINARY	0.0585	0.0358	0.0811	4.15e-07	36831	20715	16116
Volume	Pancreas	30000	White blood cell (leukocyte) count	Biological samples	White blood cells	LINEAR	-0.0284	-0.0394	-0.0174	4.37e-07	35560	NA	NA
Volume	Pancreas	25825	"Volume of grey matter in Lateral Occipital Cortex, superior division (right)"	Physical Measures	Brain MRI	LINEAR	0.036	0.022	0.05	4.8e-07	19713	NA	NA
Volume	Pancreas	23119	Arm fat percentage (right)	Physical Measures	Impedance	LINEAR	-0.0136	-0.0189	-0.00832	4.81e-07	36906	NA	NA
Volume	Pancreas	6160#1	Leisure/social activities: Sports club or gym	Lifestyle and History	Psychosocial factors	LOGISTIC-BINARY	0.0593	0.0361	0.0824	5.2e-07	37324	13472	23852
Volume	Pancreas	6164#3	Recent strenuous sports	Lifestyle and History	Lifestyle and environment	LOGISTIC-BINARY	0.0812	0.0492	0.113	6.66e-07	36831	5473	31358
Volume	Pancreas	6142#4	Current employment status: Unable to work because of sickness or disability	Lifestyle and History	Sociodemographics	LOGISTIC-BINARY	-0.22	-0.307	-0.132	8.68e-07	37310	514	36796
Volume	Pancreas	1568	Average weekly red wine intake	Lifestyle and History	Lifestyle and environment	ORDERED-LOGISTIC	0.0588	0.0353	0.0823	9.13e-07	28425	NA	NA
Volume	Pancreas	25785	Volume of grey matter in Insular Cortex (right)	Physical Measures	Brain MRI	LINEAR	0.0334	0.02	0.0468	1.04e-06	19713	NA	NA
Volume	Pancreas	22032	IPAQ activity group	Lifestyle and History	Lifestyle and environment	ORDERED-LOGISTIC	0.0557	0.0333	0.0781	1.09e-06	31747	NA	NA
Volume	Pancreas	20003#1140864752	Treatment/medication code: lansoprazole	Medical history	Medications	LOGISTIC-BINARY	-0.176	-0.246	-0.105	1.13e-06	37376	850	36526
Volume	Pancreas	25010	"Volume of brain, grey+white matter"	Physical Measures	Brain MRI	LINEAR	0.029	0.0173	0.0407	1.2e-06	19718	NA	NA
Volume	Pancreas	25847	Volume of grey matter in Frontal Orbital Cortex (right)	Physical Measures	Brain MRI	LINEAR	0.0329	0.0196	0.0462	1.33e-06	19713	NA	NA
Volume	Pancreas	21059	Degree bothered by nausea in the last 3 months	Online follow-up	Digestive health	ORDERED-LOGISTIC	-0.0908	-0.128	-0.054	1.34e-06	29201	NA	NA
Volume	Pancreas	30610	ALP	Biological samples	Bone and joint	LINEAR	-0.0267	-0.0378	-0.0157	2.11e-06	34936	NA	NA
Volume	Pancreas	25859	Volume of grey matter in Temporal Occipital Fusiform Cortex (right)	Physical Measures	Brain MRI	LINEAR	0.0334	0.0195	0.0473	2.54e-06	19713	NA	NA
Volume	Pancreas	2734	Number of live births	Lifestyle and History	Sex-specific factors	ORDERED-LOGISTIC	0.0715	0.0413	0.102	3.46e-06	19326	NA	NA
Volume	Pancreas	21032	Frequency of harder stools when abdominal discomfort/pain started	Online follow-up	Digestive health	ORDERED-LOGISTIC	-0.0786	-0.112	-0.0454	3.48e-06	15233	NA	NA
Volume	Pancreas	21058	Degree bothered by urinary frequency/bladder irritability in the last 3 months	Online follow-up	Digestive health	ORDERED-LOGISTIC	-0.0575	-0.0821	-0.0329	4.48e-06	29196	NA	NA
Volume	Pancreas	25830	Volume of grey matter in Frontal Medial Cortex (left)	Physical Measures	Brain MRI	LINEAR	0.0333	0.0191	0.0476	4.56e-06	19713	NA	NA
Volume	Pancreas	25024	Volume of accumbens (right)	Physical Measures	Brain MRI	LINEAR	0.0321	0.0183	0.0459	5.03e-06	19702	NA	NA
Volume	Pancreas	30070	EDW	Biological samples	Red blood cells	LINEAR	-0.026	-0.0372	-0.0148	5.09e-06	35560	NA	NA
Volume	Pancreas	20003#1140879616	Treatment/medication code: amitriptyline	Medical history	Medications	LOGISTIC-BINARY	-0.252	-0.36	-0.143	5.24e-06	37376	374	37002
Volume	Pancreas	23099	Body fat %	Physical Measures	Impedance	LINEAR	-0.0128	-0.0184	-0.0073	5.4e-06	36902	NA	NA
Volume	Pancreas	25016	Volume of putamen (right)	Physical Measures	Brain MRI	LINEAR	0.0299	0.017	0.0428	5.61e-06	19702	NA	NA
Volume	Pancreas	20117-2	Alcohol drinker status	Lifestyle and History	Lifestyle and environment	MULTINOMIAL-LOGISTIC	NA	NA	NA	7.74e-06	NA	NA	NA
Volume	Pancreas	20191	Fluid intelligence score	Online follow-up	Fluid intelligence	ORDERED-LOGISTIC	0.0606	0.034	0.0873	8.45e-06	19882	NA	NA
Volume	Pancreas	25899	Volume of grey matter in VI Cerebellum (right)	Physical Measures	Brain MRI	LINEAR	0.0316	0.0177	0.0456	8.59e-06	19713	NA	NA
Volume	Pancreas	25860	Volume of grey matter in Occipital Fusiform Gyrus (left)	Physical Measures	Brain MRI	LINEAR	0.0318	0.0178	0.0459	8.66e-06	19713	NA	NA
Volume	Pancreas	12685	Total peripheral resistance during PWA	Physical Measures	Heart MRI	LINEAR	0.0247	0.0137	0.0356	1.01e-05	33561	NA	NA
Volume	Pancreas	6179#1	Mineral and other dietary supplements: Fish oil (including cod liver oil)	Medical history	Health and medical history	LOGISTIC-BINARY	0.0552	0.0307	0.0797	1.04e-05	36823	11708	25115
Volume	Pancreas	709	Number in household	Lifestyle and History	Sociodemographics	ORDERED-LOGISTIC	0.0461	0.0256	0.0666	1.06e-05	37275	NA	NA
Volume	Pancreas	30890	Vitamin D	Biological samples	Bone and joint	LINEAR	0.0252	0.014	0.0364	1.1e-05	33560	NA	NA
Volume	Pancreas	25784	Volume of grey matter in Insular Cortex (left)	Physical Measures	Brain MRI	LINEAR	0.0301	0.0167	0.0435	1.12e-05	19713	NA	NA
Volume	Pancreas	21024	Ever diagnosed with IBS	Online follow-up	Digestive health	LOGISTIC-BINARY	-0.0903	-0.131	-0.0499	1.18e-05	28441	3232	25209
Volume	Pancreas	30140	Neutrophill count	Biological samples	White blood cells	LINEAR	-0.0248	-0.0359	-0.0137	1.19e-05	35512	NA	NA
Volume	Pancreas	22504	Bring up phlegm/sputum/mucus on most days	Online follow-up	Medical information	LOGISTIC-BINARY	-0.118	-0.171	-0.065	1.23e-05	20840	1673	19167
Volume	Pancreas	25879	Volume of grey matter in Thalamus (right)	Physical Measures	Brain MRI	LINEAR	0.0315	0.0174	0.0456	1.23e-05	19713	NA	NA
Volume	Pancreas	2664-05-01	Reason for reducing amount of alcohol drunk	Lifestyle and History	Lifestyle and environment	MULTINOMIAL-LOGISTIC	NA	NA	NA	1.23e-05	NA	NA	NA
Volume	Pancreas	25897	Volume of grey matter in VI Cerebellum (left)	Physical Measures	Brain MRI	LINEAR	0.031	0.0171	0.0449	1.24e-05	19713	NA	NA
Volume	Pancreas	25814	Volume of grey matter in Postcentral Gyrus (left)	Physical Measures	Brain MRI	LINEAR	0.0315	0.0173	0.0457	1.32e-05	19713	NA	NA
Volume	Pancreas	25819	"Volume of grey matter in Supramarginal Gyrus, anterior division (right)"	Physical Measures	Brain MRI	LINEAR	0.0331	0.0182	0.0479	1.34e-05	19713	NA	NA
Volume	Pancreas	25896	Volume of grey matter in V Cerebellum (right)	Physical Measures	Brain MRI	LINEAR	0.0314	0.0172	0.0456	1.42e-05	19713	NA	NA
Volume	Pancreas	21038	Currently suffer from abdominal distension	Online follow-up	Digestive health	LOGISTIC-BINARY	-0.0688	-0.1	-0.0376	1.53e-05	29149	6485	22664
Volume	Pancreas	22033	Summed days activity	Lifestyle and History	Lifestyle and environment	LINEAR	0.0257	0.014	0.0373	1.58e-05	32541	NA	NA
Volume	Pancreas	2316	Wheeze in last year	Medical history	Health and medical history	LOGISTIC-BINARY	-0.0649	-0.0945	-0.0354	1.68e-05	36866	6088	30778
Volume	Pancreas	23128	Trunk fat mass	Physical Measures	Impedance	LINEAR	-0.0144	-0.021	-0.00784	1.7e-05	36883	NA	NA
Volume	Pancreas	30830	SHBG	Biological samples	Cancer	LINEAR	-0.0215	-0.0314	-0.0117	1.79e-05	31595	NA	NA
Volume	Pancreas	21053	Degree bothered by dizziness in the last 3 months	Online follow-up	Digestive health	ORDERED-LOGISTIC	-0.0625	-0.0911	-0.0339	1.88e-05	29202	NA	NA
Volume	Pancreas	25908	Volume of grey matter in VIIb Cerebellum (right)	Physical Measures	Brain MRI	LINEAR	0.0314	0.017	0.0458	1.91e-05	19713	NA	NA
Volume	Kidney	30700	Creatinine	Biological samples	Renal	LINEAR	-0.48	-0.49	-0.469	1e-300	36163	NA	NA
Volume	Kidney	30720	Cystatin C	Biological samples	Renal	LINEAR	-0.534	-0.546	-0.523	1e-300	36180	NA	NA
Volume	Kidney	23122	R arm pred. mass	Physical Measures	Impedance	LINEAR	0.0853	0.0797	0.0908	2.95e-196	38184	NA	NA
Volume	Kidney	23121	R arm FF mass	Physical Measures	Impedance	LINEAR	0.0849	0.0794	0.0905	5.37e-194	38184	NA	NA
Volume	Kidney	23105	Basal metabolic rate	Physical Measures	Impedance	LINEAR	0.0716	0.0669	0.0764	2.41e-191	38201	NA	NA
Volume	Kidney	23101	Whole body FF mass	Physical Measures	Impedance	LINEAR	0.0753	0.0702	0.0804	1.13e-180	38202	NA	NA
Volume	Kidney	23126	Arm predicted mass (left)	Physical Measures	Impedance	LINEAR	0.0805	0.075	0.086	5.29e-179	38178	NA	NA
Volume	Kidney	23102	Whole body water mass	Physical Measures	Impedance	LINEAR	0.0755	0.0703	0.0806	1.42e-178	38202	NA	NA
Volume	Kidney	23125	Arm fat-free mass (left)	Physical Measures	Impedance	LINEAR	0.0799	0.0744	0.0854	1.79e-176	38180	NA	NA
Volume	Kidney	30670	Urea	Biological samples	Renal	LINEAR	-0.2	-0.214	-0.186	1.67e-168	36152	NA	NA
Volume	Kidney	23110	L arm	Physical Measures	Impedance	LINEAR	-0.12	-0.128	-0.111	1.98e-161	38198	NA	NA
Volume	Kidney	23129	Trunk fat-free mass	Physical Measures	Impedance	LINEAR	0.0777	0.0721	0.0834	9.34e-160	38156	NA	NA
Volume	Kidney	23130	Trunk predicted mass	Physical Measures	Impedance	LINEAR	0.0774	0.0718	0.0831	4.92e-158	38153	NA	NA
Volume	Kidney	23109	R arm	Physical Measures	Impedance	LINEAR	-0.118	-0.127	-0.11	5.52e-158	38196	NA	NA
Volume	Kidney	23106	Whole body	Physical Measures	Impedance	LINEAR	-0.121	-0.129	-0.112	9.73e-156	38200	NA	NA
Volume	Kidney	21001	Body mass index (BMI)	Physical Measures	Body size measures	LINEAR	0.089	0.0823	0.0958	3.93e-146	38627	NA	NA
Volume	Kidney	21002	Weight	Physical Measures	Body size measures	LINEAR	0.0666	0.0614	0.0719	1.19e-136	38632	NA	NA
Volume	Kidney	23117	Leg fat-free mass (left)	Physical Measures	Impedance	LINEAR	0.0619	0.0567	0.067	6.16e-122	38190	NA	NA
Volume	Kidney	23118	Leg predicted mass (left)	Physical Measures	Impedance	LINEAR	0.0616	0.0565	0.0668	1.79e-121	38190	NA	NA
Volume	Kidney	23113	Leg fat-free mass (right)	Physical Measures	Impedance	LINEAR	0.0619	0.0566	0.0673	3.06e-113	38195	NA	NA
Volume	Kidney	23114	Leg predicted mass (right)	Physical Measures	Impedance	LINEAR	0.0616	0.0562	0.0669	1.05e-112	38195	NA	NA
Volume	Kidney	30880	Urate	Biological samples	Renal	LINEAR	-0.126	-0.137	-0.114	1.58e-102	36139	NA	NA
Volume	Kidney	23116	Leg fat mass (left)	Physical Measures	Impedance	LINEAR	0.062	0.0559	0.0681	5.38e-88	38194	NA	NA
Volume	Kidney	48	Waist circumference	Physical Measures	Body size measures	LINEAR	0.0735	0.0659	0.0812	2.65e-79	38648	NA	NA
Volume	Kidney	23112	Leg fat mass (right)	Physical Measures	Impedance	LINEAR	0.0601	0.0539	0.0663	5.11e-79	38197	NA	NA
Volume	Kidney	1558	Alcohol freq.	Lifestyle and History	Lifestyle and environment	ORDERED-LOGISTIC	-0.23	-0.256	-0.204	5.91e-67	38661	NA	NA
Volume	Kidney	30730	GGT	Biological samples	Liver	LINEAR	0.113	0.1	0.126	4.1e-63	36164	NA	NA
Volume	Kidney	12340	QRS duration	Physical Measures	ECG at rest	LINEAR	0.122	0.107	0.136	4.52e-63	33690	NA	NA
Volume	Kidney	23107	R leg	Physical Measures	Impedance	LINEAR	-0.0923	-0.103	-0.0814	1.57e-61	38201	NA	NA
Volume	Kidney	20116-0	Smoking status	Lifestyle and History	Lifestyle and environment	MULTINOMIAL-LOGISTIC	NA	NA	NA	7.55e-60	NA	NA	NA
Volume	Kidney	23108	L leg	Physical Measures	Impedance	LINEAR	-0.091	-0.102	-0.0799	1.29e-58	38199	NA	NA
Volume	Kidney	30600	Albumin	Biological samples	Liver	LINEAR	0.122	0.107	0.137	1.85e-55	33034	NA	NA
Volume	Kidney	23124	Arm fat mass (left)	Physical Measures	Impedance	LINEAR	0.0617	0.054	0.0694	2.45e-55	38181	NA	NA
Volume	Kidney	20414	Freq alcohol	Online follow-up	Alcohol use	ORDERED-LOGISTIC	0.255	0.223	0.287	1.27e-54	26770	NA	NA
Volume	Kidney	23120	Arm fat mass (right)	Physical Measures	Impedance	LINEAR	0.0608	0.0531	0.0685	9.58e-54	38186	NA	NA
Volume	Kidney	1329	Oily fish intake	Lifestyle and History	Lifestyle and environment	ORDERED-LOGISTIC	0.21	0.183	0.236	1.45e-52	38600	NA	NA
Volume	Kidney	20416	Freq 6+ units alcohol	Online follow-up	Alcohol use	ORDERED-LOGISTIC	0.269	0.235	0.304	2.01e-52	24883	NA	NA
Volume	Kidney	30620	ALT	Biological samples	Liver	LINEAR	0.104	0.0905	0.117	2.66e-52	36177	NA	NA
Volume	Kidney	20403	Alchohol/day	Online follow-up	Alcohol use	ORDERED-LOGISTIC	0.245	0.21	0.28	4.92e-43	24847	NA	NA
Volume	Kidney	25008	Volume of white matter	Physical Measures	Brain MRI	LINEAR	0.107	0.0914	0.123	8.53e-41	19592	NA	NA
Volume	Kidney	25025	Volume of brain stem + 4th ventricle	Physical Measures	Brain MRI	LINEAR	0.118	0.0999	0.135	6.95e-39	19577	NA	NA
Volume	Kidney	25010	"Volume of brain, grey+white matter"	Physical Measures	Brain MRI	LINEAR	0.103	0.0875	0.118	7.12e-39	19592	NA	NA
Volume	Kidney	30830	SHBG	Biological samples	Cancer	LINEAR	-0.0857	-0.0987	-0.0728	2.13e-38	32708	NA	NA
Volume	Kidney	25001	Volume of peripheral cortical grey matter (normalised for head size)	Physical Measures	Brain MRI	LINEAR	-0.101	-0.116	-0.0855	1.66e-37	19592	NA	NA
Volume	Kidney	23100	Whole body fat mass	Physical Measures	Impedance	LINEAR	0.0512	0.0433	0.0591	3.25e-37	38155	NA	NA
Volume	Kidney	1498	Coffee intake	Lifestyle and History	Lifestyle and environment	ORDERED-LOGISTIC	0.184	0.156	0.212	5.64e-37	35578	NA	NA
Volume	Kidney	1239	Current tobacco smoking	Lifestyle and History	Lifestyle and environment	ORDERED-LOGISTIC	0.374	0.316	0.432	1.24e-36	38660	NA	NA
Volume	Kidney	4080	"Systolic blood pressure, automated reading"	Physical Measures	Blood pressure	LINEAR	0.087	0.0733	0.101	8.15e-36	36318	NA	NA
Volume	Kidney	25886	Volume of grey matter in Hippocampus (left)	Physical Measures	Brain MRI	LINEAR	0.114	0.0958	0.132	3.98e-35	19587	NA	NA
Volume	Kidney	25880	Volume of grey matter in Caudate (left)	Physical Measures	Brain MRI	LINEAR	0.122	0.102	0.141	7.29e-34	19587	NA	NA
Volume	Kidney	25005	Volume of grey matter (normalised for head size)	Physical Measures	Brain MRI	LINEAR	-0.091	-0.106	-0.0761	5.7e-33	19592	NA	NA
Volume	Kidney	20022	Birth weight	Lifestyle and History	Early life factors	LINEAR	0.11	0.0917	0.128	1.96e-32	23122	NA	NA
Volume	Kidney	25881	Volume of grey matter in Caudate (right)	Physical Measures	Brain MRI	LINEAR	0.117	0.098	0.137	2.17e-32	19587	NA	NA
Volume	Kidney	22506-114	Tobacco smoking	Online follow-up	Medical information	MULTINOMIAL-LOGISTIC	NA	NA	NA	8.06e-32	NA	NA	NA
Volume	Kidney	1249	Past tobacco smoking	Lifestyle and History	Lifestyle and environment	ORDERED-LOGISTIC	-0.164	-0.192	-0.137	4.4e-31	37033	NA	NA
Volume	Kidney	1379	Lamb/mutton intake	Lifestyle and History	Lifestyle and environment	ORDERED-LOGISTIC	0.168	0.14	0.197	1.44e-30	38575	NA	NA
Volume	Kidney	25887	Volume of grey matter in Hippocampus (right)	Physical Measures	Brain MRI	LINEAR	0.106	0.0876	0.124	3.4e-30	19587	NA	NA
Volume	Kidney	6150#4	High blood pressure	Medical history	Health and medical history	LOGISTIC-BINARY	0.21	0.173	0.247	6.06e-29	38635	7691	30944
Volume	Kidney	20160	Ever smoked	Lifestyle and History	Lifestyle and environment	LOGISTIC-BINARY	0.168	0.138	0.198	2.8e-28	38594	21998	16596
Volume	Kidney	30740	Glucose	Biological samples	Diabetes	LINEAR	0.087	0.0716	0.102	3.11e-28	32992	NA	NA
Volume	Kidney	25835	Volume of grey matter in Subcallosal Cortex (right)	Physical Measures	Brain MRI	LINEAR	0.1	0.0822	0.118	4.92e-28	19587	NA	NA
Volume	Kidney	25014	Volume of caudate (right)	Physical Measures	Brain MRI	LINEAR	0.105	0.0859	0.123	9.86e-28	19577	NA	NA
Volume	Kidney	6150#100	Vascular/heart problems	Medical history	Health and medical history	LOGISTIC-BINARY	-0.201	-0.237	-0.165	9.88e-28	38635	30316	8319
Volume	Kidney	25893	Volume of grey matter in I-IV Cerebellum (left)	Physical Measures	Brain MRI	LINEAR	0.106	0.0869	0.125	2.6e-27	19587	NA	NA
Volume	Kidney	25006	Volume of grey matter	Physical Measures	Brain MRI	LINEAR	0.0873	0.0715	0.103	3.84e-27	19592	NA	NA
Volume	Kidney	25013	Volume of caudate (left)	Physical Measures	Brain MRI	LINEAR	0.102	0.0837	0.121	7.18e-27	19577	NA	NA
Volume	Kidney	25853	Volume of grey matter in Lingual Gyrus (right)	Physical Measures	Brain MRI	LINEAR	0.0947	0.0774	0.112	9.56e-27	19587	NA	NA
Volume	Kidney	1339	Non-oily fish intake	Lifestyle and History	Lifestyle and environment	ORDERED-LOGISTIC	0.149	0.122	0.176	1.92e-26	38601	NA	NA
Volume	Kidney	1389	Pork intake	Lifestyle and History	Lifestyle and environment	ORDERED-LOGISTIC	0.153	0.125	0.182	1.32e-25	38590	NA	NA
Volume	Kidney	3143	Ankle spacing width	Physical Measures	Bone-densitometry of heel	LINEAR	0.0712	0.0579	0.0846	1.53e-25	20747	NA	NA
Volume	Kidney	12338	P duration	Physical Measures	ECG at rest	LINEAR	0.0836	0.0679	0.0993	2.08e-25	31864	NA	NA
Volume	Kidney	25894	Volume of grey matter in I-IV Cerebellum (right)	Physical Measures	Brain MRI	LINEAR	0.101	0.0821	0.12	4.03e-25	19587	NA	NA
Volume	Kidney	25012	Volume of thalamus (right)	Physical Measures	Brain MRI	LINEAR	0.0875	0.0709	0.104	4.36e-25	19577	NA	NA
Volume	Kidney	25784	Volume of grey matter in Insular Cortex (left)	Physical Measures	Brain MRI	LINEAR	0.0936	0.0758	0.111	6.13e-25	19587	NA	NA
Volume	Kidney	25011	Volume of thalamus (left)	Physical Measures	Brain MRI	LINEAR	0.0873	0.0706	0.104	1.98e-24	19577	NA	NA
Volume	Kidney	25016	Volume of putamen (right)	Physical Measures	Brain MRI	LINEAR	0.0887	0.0716	0.106	3.1e-24	19577	NA	NA
Volume	Kidney	25852	Volume of grey matter in Lingual Gyrus (left)	Physical Measures	Brain MRI	LINEAR	0.0891	0.0718	0.106	4.35e-24	19587	NA	NA
Volume	Kidney	30240	Reticulocyte percentage	Biological samples	Red blood cells	LINEAR	0.0721	0.058	0.0862	1.82e-23	36185	NA	NA
Volume	Kidney	1369	Beef intake	Lifestyle and History	Lifestyle and environment	ORDERED-LOGISTIC	0.136	0.109	0.163	6.09e-23	38613	NA	NA
Volume	Kidney	2139	Age first had sexual intercourse	Lifestyle and History	Lifestyle and environment	LINEAR	-0.0727	-0.0872	-0.0583	7.36e-23	35828	NA	NA
Volume	Kidney	1528	Water intake	Lifestyle and History	Lifestyle and environment	ORDERED-LOGISTIC	0.143	0.115	0.172	7.56e-23	35290	NA	NA
Volume	Kidney	25834	Volume of grey matter in Subcallosal Cortex (left)	Physical Measures	Brain MRI	LINEAR	0.0893	0.0715	0.107	8.97e-23	19587	NA	NA
Volume	Kidney	30290	High light scatter reticulocyte percentage	Biological samples	Red blood cells	LINEAR	0.0695	0.0555	0.0835	2.38e-22	36185	NA	NA
Volume	Kidney	2443	Diabetes	Medical history	Health and medical history	LOGISTIC-BINARY	0.406	0.324	0.488	2.62e-22	38619	1024	37595
Volume	Kidney	738	Average total household income before tax	Lifestyle and History	Sociodemographics	ORDERED-LOGISTIC	0.135	0.108	0.163	4.18e-22	34927	NA	NA
Volume	Kidney	30070	EDW	Biological samples	Red blood cells	LINEAR	-0.0726	-0.0873	-0.0579	4.18e-22	36819	NA	NA
Volume	Kidney	23115	Leg fat percentage (left)	Physical Measures	Impedance	LINEAR	0.0285	0.0227	0.0343	5.1e-22	38194	NA	NA
Volume	Kidney	25879	Volume of grey matter in Thalamus (right)	Physical Measures	Brain MRI	LINEAR	0.0919	0.0732	0.111	5.98e-22	19587	NA	NA
Volume	Kidney	30250	RC	Biological samples	Red blood cells	LINEAR	0.0679	0.054	0.0817	7.57e-22	36184	NA	NA
Volume	Kidney	25781	Total volume of white matter hyperintensities (from T1 and T2_FLAIR images)	Physical Measures	Brain MRI	LINEAR	0.0866	0.0689	0.104	7.71e-22	18540	NA	NA
Volume	Kidney	25004	Volume of ventricular cerebrospinal fluid	Physical Measures	Brain MRI	LINEAR	0.0815	0.0649	0.0982	8.67e-22	19592	NA	NA
Volume	Kidney	30300	HLSRC	Biological samples	Red blood cells	LINEAR	0.0672	0.0534	0.081	1.3e-21	36184	NA	NA
Volume	Kidney	30750	HbA1c	Biological samples	Diabetes	LINEAR	0.0688	0.0547	0.083	1.89e-21	35925	NA	NA
Volume	Kidney	25878	Volume of grey matter in Thalamus (left)	Physical Measures	Brain MRI	LINEAR	0.0923	0.0733	0.111	2.08e-21	19587	NA	NA
Volume	Kidney	25785	Volume of grey matter in Insular Cortex (right)	Physical Measures	Brain MRI	LINEAR	0.0848	0.067	0.102	8.34e-21	19587	NA	NA
Volume	Kidney	1110	Length of mobile phone use	Lifestyle and History	Lifestyle and environment	ORDERED-LOGISTIC	0.128	0.101	0.155	9.46e-21	38470	NA	NA
Volume	Kidney	25896	Volume of grey matter in V Cerebellum (right)	Physical Measures	Brain MRI	LINEAR	0.0892	0.0704	0.108	1.33e-20	19587	NA	NA
Volume	Kidney	1359	Poultry intake	Lifestyle and History	Lifestyle and environment	ORDERED-LOGISTIC	0.13	0.103	0.158	1.45e-20	38646	NA	NA
Volume	Kidney	1568	Average weekly red wine intake	Lifestyle and History	Lifestyle and environment	ORDERED-LOGISTIC	0.147	0.116	0.178	3.94e-20	29406	NA	NA
Volume	Kidney	25841	"Volume of grey matter in Cingulate Gyrus, posterior division (right)"	Physical Measures	Brain MRI	LINEAR	0.0817	0.0641	0.0994	1.32e-19	19587	NA	NA
Volume	Kidney	30810	Phosphate	Biological samples	Renal	LINEAR	0.0698	0.0546	0.0849	1.61e-19	32983	NA	NA
Volume	Kidney	25895	Volume of grey matter in V Cerebellum (left)	Physical Measures	Brain MRI	LINEAR	0.0867	0.0678	0.106	2.07e-19	19587	NA	NA
Volume	Kidney	25919	Volume of grey matter in Vermis X Cerebellum	Physical Measures	Brain MRI	LINEAR	0.0901	0.0705	0.11	2.22e-19	19587	NA	NA
Volume	Kidney	25840	"Volume of grey matter in Cingulate Gyrus, posterior division (left)"	Physical Measures	Brain MRI	LINEAR	0.0802	0.0627	0.0977	2.71e-19	19587	NA	NA
Volume	Kidney	20004#1487	Operation code: nephrectomy/kidney removed	Medical history	Operations	LOGISTIC-BINARY	-1.25	-1.51	-0.964	3.19e-19	38674	37	38637
Volume	Kidney	4079	"Diastolic blood pressure, automated reading"	Physical Measures	Blood pressure	LINEAR	0.0642	0.0501	0.0782	3.8e-19	36318	NA	NA
Volume	Kidney	25018	Volume of pallidum (right)	Physical Measures	Brain MRI	LINEAR	0.0845	0.066	0.103	4.4e-19	19577	NA	NA
Volume	Kidney	12687	Mean arterial pressure during PWA	Physical Measures	Heart MRI	LINEAR	0.0687	0.0536	0.0838	4.93e-19	33664	NA	NA
Volume	Kidney	25899	Volume of grey matter in VI Cerebellum (right)	Physical Measures	Brain MRI	LINEAR	0.0839	0.0654	0.102	5.95e-19	19587	NA	NA
Volume	Kidney	25017	Volume of pallidum (left)	Physical Measures	Brain MRI	LINEAR	0.0835	0.0648	0.102	1.81e-18	19577	NA	NA
Volume	Kidney	2149	Lifetime number of sexual partners	Lifestyle and History	Lifestyle and environment	ORDERED-LOGISTIC	0.131	0.101	0.16	3.22e-18	33786	NA	NA
Volume	Kidney	25002	Volume of peripheral cortical grey matter	Physical Measures	Brain MRI	LINEAR	0.0708	0.0548	0.0868	4.15e-18	19592	NA	NA
Volume	Kidney	2744	Birth weight of first child	Lifestyle and History	Sex-specific factors	ORDERED-LOGISTIC	0.208	0.161	0.255	4.58e-18	15483	NA	NA
Volume	Kidney	22680	Mean carotid IMT (intima-medial thickness) at 240 degrees	Physical Measures	Carotid ultrasound	LINEAR	0.0761	0.0589	0.0934	5.97e-18	22572	NA	NA
Volume	Kidney	25009	"Volume of brain, grey+white matter (normalised for head size)"	Physical Measures	Brain MRI	LINEAR	-0.0728	-0.0893	-0.0563	6.37e-18	19592	NA	NA
Volume	Kidney	20405-0	"Ever had known person concerned about, or recommend reduction of, alcohol consumption"	Online follow-up	Alcohol use	MULTINOMIAL-LOGISTIC	NA	NA	NA	7.21e-18	NA	NA	NA
Volume	Kidney	2040	Risk taking	Lifestyle and History	Psychosocial factors	LOGISTIC-BINARY	0.142	0.11	0.175	1.59e-17	37525	10672	26853
Volume	Kidney	25015	Volume of putamen (left)	Physical Measures	Brain MRI	LINEAR	0.0744	0.0573	0.0916	1.9e-17	19577	NA	NA
Volume	Kidney	22681	Maximum carotid IMT (intima-medial thickness) at 240 degrees	Physical Measures	Carotid ultrasound	LINEAR	0.075	0.0577	0.0923	2.12e-17	22572	NA	NA
Volume	Kidney	30180	Lymphocyte percentage	Biological samples	White blood cells	LINEAR	0.0635	0.0489	0.0782	2.12e-17	36763	NA	NA
Volume	Kidney	25858	Volume of grey matter in Temporal Occipital Fusiform Cortex (left)	Physical Measures	Brain MRI	LINEAR	0.0816	0.0627	0.1	2.72e-17	19587	NA	NA
Volume	Kidney	25897	Volume of grey matter in VI Cerebellum (left)	Physical Measures	Brain MRI	LINEAR	0.079	0.0606	0.0974	4.45e-17	19587	NA	NA
Volume	Kidney	30860	Total protein	Biological samples	Renal	LINEAR	0.0657	0.0501	0.0812	1.27e-16	32990	NA	NA
Volume	Kidney	20003#1140884600	Metformin	Medical history	Medications	LOGISTIC-BINARY	0.462	0.353	0.572	1.32e-16	38674	525	38149
Volume	Kidney	25020	Volume of hippocampus (right)	Physical Measures	Brain MRI	LINEAR	0.0795	0.0606	0.0984	1.65e-16	19577	NA	NA
Volume	Kidney	1289	Cooked vegetable intake	Lifestyle and History	Lifestyle and environment	ORDERED-LOGISTIC	0.117	0.0894	0.145	1.93e-16	37779	NA	NA
Volume	Kidney	12698	Diastolic brachial blood pressure	Physical Measures	Heart MRI	LINEAR	0.0624	0.0474	0.0774	3.5e-16	34022	NA	NA
Volume	Kidney	30080	Platelet count	Biological samples	Platelets	LINEAR	0.0594	0.0451	0.0736	3.55e-16	36820	NA	NA
Volume	Kidney	6160#2	Leisure/social activities: Pub or social club	Lifestyle and History	Psychosocial factors	LOGISTIC-BINARY	0.138	0.105	0.171	4.11e-16	38620	9982	28638
Volume	Kidney	25859	Volume of grey matter in Temporal Occipital Fusiform Cortex (right)	Physical Measures	Brain MRI	LINEAR	0.0759	0.0575	0.0943	7.28e-16	19587	NA	NA
Volume	Kidney	23111	Leg fat percentage (right)	Physical Measures	Impedance	LINEAR	0.0244	0.0185	0.0303	7.38e-16	38199	NA	NA
Volume	Kidney	25848	"Volume of grey matter in Parahippocampal Gyrus, anterior division (left)"	Physical Measures	Brain MRI	LINEAR	0.0738	0.0558	0.0917	8.27e-16	19587	NA	NA
Volume	Kidney	102	"Pulse rate, automated reading"	Physical Measures	Blood pressure	LINEAR	0.06	0.0454	0.0747	8.85e-16	36318	NA	NA
Volume	Kidney	22671	Mean carotid IMT (intima-medial thickness) at 120 degrees	Physical Measures	Carotid ultrasound	LINEAR	0.0699	0.0528	0.087	1.11e-15	22733	NA	NA
Volume	Kidney	3064	Peak expiratory flow (PEF)	Physical Measures	Spirometry	LINEAR	0.0479	0.0361	0.0596	1.42e-15	35719	NA	NA
Volume	Kidney	46	Hand grip strength (left)	Physical Measures	Hand grip strength	LINEAR	0.0385	0.029	0.0481	2.74e-15	38570	NA	NA
Volume	Kidney	25873	Volume of grey matter in Planum Temporale (right)	Physical Measures	Brain MRI	LINEAR	0.073	0.0548	0.0912	3.59e-15	19587	NA	NA
Volume	Kidney	30120	Lymphocyte count	Biological samples	White blood cells	LINEAR	0.0581	0.0435	0.0726	4.51e-15	36762	NA	NA
Volume	Kidney	30200	Neutrophill percentage	Biological samples	White blood cells	LINEAR	-0.0586	-0.0734	-0.0438	7.48e-15	36763	NA	NA
Volume	Kidney	1299	Salad / raw vegetable intake	Lifestyle and History	Lifestyle and environment	ORDERED-LOGISTIC	0.117	0.0873	0.147	1.18e-14	36384	NA	NA
Volume	Kidney	1468-3	Cereal type	Lifestyle and History	Lifestyle and environment	MULTINOMIAL-LOGISTIC	NA	NA	NA	1.32e-14	NA	NA	NA
Volume	Kidney	20117-2	Alcohol drinker status	Lifestyle and History	Lifestyle and environment	MULTINOMIAL-LOGISTIC	NA	NA	NA	1.66e-14	NA	NA	NA
Volume	Kidney	20453	Ever taken cannabis	Online follow-up	Cannabis use	ORDERED-LOGISTIC	0.168	0.125	0.211	1.71e-14	26759	NA	NA
Volume	Kidney	23128	Trunk fat mass	Physical Measures	Impedance	LINEAR	0.0337	0.0251	0.0423	1.86e-14	38164	NA	NA
Volume	Kidney	6179#100	Mineral and other dietary supplements	Medical history	Health and medical history	LOGISTIC-BINARY	-0.119	-0.149	-0.0882	1.95e-14	38116	21649	16467
Volume	Kidney	1120	Weekly usage of mobile phone in last 3 months	Lifestyle and History	Lifestyle and environment	ORDERED-LOGISTIC	0.11	0.082	0.139	2.1e-14	33021	NA	NA
Volume	Kidney	22679	Minimum carotid IMT (intima-medial thickness) at 240 degrees	Physical Measures	Carotid ultrasound	LINEAR	0.0692	0.0514	0.0869	2.18e-14	22572	NA	NA
Volume	Kidney	1100	Drive faster than motorway speed limit	Lifestyle and History	Lifestyle and environment	ORDERED-LOGISTIC	0.109	0.0807	0.137	3.01e-14	36631	NA	NA
Volume	Kidney	6144#4	"Never eat eggs, dairy, wheat, sugar": Sugar or foods/drinks containing sugar	Lifestyle and History	Lifestyle and environment	LOGISTIC-BINARY	0.156	0.115	0.196	4.23e-14	38114	5842	32272
Volume	Kidney	100001	Food weight	Online follow-up	Estimated nutrients yesterday	LINEAR	0.142	0.106	0.179	4.39e-14	5729	NA	NA
Volume	Kidney	1210	Snoring	Lifestyle and History	Lifestyle and environment	LOGISTIC-BINARY	-0.123	-0.156	-0.0914	4.66e-14	36512	23229	13283
Volume	Kidney	25850	"Volume of grey matter in Parahippocampal Gyrus, posterior division (left)"	Physical Measures	Brain MRI	LINEAR	0.0732	0.0541	0.0922	4.81e-14	19587	NA	NA
Volume	Kidney	25849	"Volume of grey matter in Parahippocampal Gyrus, anterior division (right)"	Physical Measures	Brain MRI	LINEAR	0.0672	0.0495	0.085	1.11e-13	19587	NA	NA
Volume	Kidney	6179#1	Mineral and other dietary supplements: Fish oil (including cod liver oil)	Medical history	Health and medical history	LOGISTIC-BINARY	0.12	0.0884	0.153	1.92e-13	38116	12105	26011
Volume	Kidney	25872	Volume of grey matter in Planum Temporale (left)	Physical Measures	Brain MRI	LINEAR	0.0675	0.0493	0.0856	2.92e-13	19587	NA	NA
Volume	Kidney	30060	MCH concentration	Biological samples	Red blood cells	LINEAR	0.0542	0.0396	0.0688	3.56e-13	36818	NA	NA
Volume	Kidney	20409	Frequency of feeling guilt or remorse after drinking alcohol in last year	Online follow-up	Alcohol use	ORDERED-LOGISTIC	0.215	0.157	0.273	4.03e-13	15729	NA	NA
Volume	Kidney	20546#4	Substances taken for depression: Drugs or alcohol (more than once)	Online follow-up	Depression	LOGISTIC-BINARY	0.245	0.179	0.312	6.08e-13	26677	1887	24790
Volume	Kidney	25867	Volume of grey matter in Parietal Operculum Cortex (right)	Physical Measures	Brain MRI	LINEAR	0.0678	0.0493	0.0862	6.16e-13	19587	NA	NA
Volume	Kidney	25857	"Volume of grey matter in Temporal Fusiform Cortex, posterior division (right)"	Physical Measures	Brain MRI	LINEAR	0.0661	0.0481	0.0841	6.63e-13	19587	NA	NA
Volume	Kidney	25891	Volume of grey matter in Ventral Striatum (right)	Physical Measures	Brain MRI	LINEAR	0.0664	0.0483	0.0846	7.36e-13	19587	NA	NA
Volume	Kidney	22677	Mean carotid IMT (intima-medial thickness) at 210 degrees	Physical Measures	Carotid ultrasound	LINEAR	0.063	0.0457	0.0802	8.26e-13	22743	NA	NA
Volume	Kidney	1588	Average weekly beer plus cider intake	Lifestyle and History	Lifestyle and environment	ORDERED-LOGISTIC	0.124	0.0899	0.158	1.04e-12	29425	NA	NA
Volume	Kidney	20003#1140879802	Treatment/medication code: amlodipine	Medical history	Medications	LOGISTIC-BINARY	0.302	0.218	0.385	1.19e-12	38674	1027	37647
Volume	Kidney	25846	Volume of grey matter in Frontal Orbital Cortex (left)	Physical Measures	Brain MRI	LINEAR	0.0632	0.0457	0.0806	1.46e-12	19587	NA	NA
Volume	Kidney	12683	End systolic pressure during PWA	Physical Measures	Heart MRI	LINEAR	0.0538	0.0388	0.0688	2.28e-12	33591	NA	NA
Volume	Kidney	30260	Mean reticulocyte volume	Biological samples	Red blood cells	LINEAR	-0.0532	-0.068	-0.0383	2.34e-12	36185	NA	NA
Volume	Kidney	6179#2	Mineral and other dietary supplements: Glucosamine	Medical history	Health and medical history	LOGISTIC-BINARY	0.132	0.095	0.169	2.66e-12	38116	7879	30237
Volume	Kidney	25843	Volume of grey matter in Precuneous Cortex (right)	Physical Measures	Brain MRI	LINEAR	0.0645	0.0463	0.0826	3.2e-12	19587	NA	NA
Volume	Kidney	25890	Volume of grey matter in Ventral Striatum (left)	Physical Measures	Brain MRI	LINEAR	0.0642	0.0461	0.0822	3.21e-12	19587	NA	NA
Volume	Kidney	25865	Volume of grey matter in Central Opercular Cortex (right)	Physical Measures	Brain MRI	LINEAR	0.0646	0.0464	0.0828	3.42e-12	19587	NA	NA
Volume	Kidney	22670	Minimum carotid IMT (intima-medial thickness) at 120 degrees	Physical Measures	Carotid ultrasound	LINEAR	0.0622	0.0447	0.0798	3.62e-12	22733	NA	NA
Volume	Kidney	22672	Maximum carotid IMT (intima-medial thickness) at 120 degrees	Physical Measures	Carotid ultrasound	LINEAR	0.0608	0.0436	0.0779	4.09e-12	22733	NA	NA
Volume	Kidney	25787	Volume of grey matter in Superior Frontal Gyrus (right)	Physical Measures	Brain MRI	LINEAR	0.0669	0.0479	0.086	6.04e-12	19587	NA	NA
Volume	Kidney	25801	"Volume of grey matter in Superior Temporal Gyrus, posterior division (right)"	Physical Measures	Brain MRI	LINEAR	0.0657	0.0469	0.0844	6.81e-12	19587	NA	NA
Volume	Kidney	25802	"Volume of grey matter in Middle Temporal Gyrus, anterior division (left)"	Physical Measures	Brain MRI	LINEAR	0.0652	0.0465	0.0838	8.58e-12	19587	NA	NA
Volume	Kidney	25884	Volume of grey matter in Pallidum (left)	Physical Measures	Brain MRI	LINEAR	0.0688	0.0491	0.0885	8.71e-12	19587	NA	NA
Volume	Kidney	30510	Creatinine (enzymatic) in urine	Biological samples	Renal (urine)	LINEAR	-0.0462	-0.0595	-0.0328	1.16e-11	37440	NA	NA
Volume	Kidney	22676	Minimum carotid IMT (intima-medial thickness) at 210 degrees	Physical Measures	Carotid ultrasound	LINEAR	0.0609	0.0432	0.0785	1.34e-11	22743	NA	NA
Volume	Kidney	30870	Triglycerides	Biological samples	Cardiovascular	LINEAR	0.0472	0.0335	0.0609	1.55e-11	36157	NA	NA
Volume	Kidney	25855	"Volume of grey matter in Temporal Fusiform Cortex, anterior division (right)"	Physical Measures	Brain MRI	LINEAR	0.0622	0.0441	0.0802	1.6e-11	19587	NA	NA
Volume	Kidney	25871	Volume of grey matter in Heschl's Gyrus (includes H1 and H2) (right)	Physical Measures	Brain MRI	LINEAR	0.0621	0.044	0.0801	1.63e-11	19587	NA	NA
Volume	Kidney	22040	Summed MET minutes per week for all activity	Lifestyle and History	Lifestyle and environment	LINEAR	0.053	0.0374	0.0686	2.52e-11	32885	NA	NA
Volume	Kidney	25908	Volume of grey matter in VIIb Cerebellum (right)	Physical Measures	Brain MRI	LINEAR	0.0649	0.0458	0.0839	2.83e-11	19587	NA	NA
Volume	Kidney	30710	C-reactive protein	Biological samples	Cardiovascular	LINEAR	-0.0462	-0.0599	-0.0325	3.43e-11	36109	NA	NA
Volume	Kidney	20003#1140883066	Insulin	Medical history	Medications	LOGISTIC-BINARY	0.654	0.458	0.847	4.14e-11	38674	173	38501
Volume	Kidney	25905	Volume of grey matter in Crus II Cerebellum (right)	Physical Measures	Brain MRI	LINEAR	0.0638	0.0448	0.0827	4.22e-11	19587	NA	NA
Volume	Kidney	20162	% life smoking	Lifestyle and History	Lifestyle and environment	LINEAR	0.0892	0.0626	0.116	4.89e-11	9632	NA	NA
Volume	Kidney	22674	Mean carotid IMT (intima-medial thickness) at 150 degrees	Physical Measures	Carotid ultrasound	LINEAR	0.0573	0.0402	0.0744	5.17e-11	22816	NA	NA
Volume	Kidney	25819	"Volume of grey matter in Supramarginal Gyrus, anterior division (right)"	Physical Measures	Brain MRI	LINEAR	0.0661	0.0463	0.0858	5.6e-11	19587	NA	NA
Volume	Kidney	20003#1140868226	Treatment/medication code: aspirin	Medical history	Medications	LOGISTIC-BINARY	0.157	0.11	0.204	5.85e-11	38674	3889	34785
Volume	Kidney	25851	"Volume of grey matter in Parahippocampal Gyrus, posterior division (right)"	Physical Measures	Brain MRI	LINEAR	0.0629	0.0437	0.082	1.23e-10	19587	NA	NA
Volume	Kidney	20003#1141194794	Treatment/medication code: bendroflumethiazide	Medical history	Medications	LOGISTIC-BINARY	0.248	0.172	0.324	1.66e-10	38674	1313	37361
Volume	Kidney	12336	Ventricular rate	Physical Measures	ECG at rest	LINEAR	0.0487	0.0337	0.0636	1.67e-10	33695	NA	NA
Volume	Kidney	20408	Frequency of memory loss due to drinking alcohol in last year	Online follow-up	Alcohol use	ORDERED-LOGISTIC	0.216	0.15	0.282	1.76e-10	15732	NA	NA
Volume	Kidney	12697	Systolic brachial blood pressure	Physical Measures	Heart MRI	LINEAR	0.0478	0.0331	0.0624	1.77e-10	34020	NA	NA
Volume	Kidney	728	Number of vehicles in household	Lifestyle and History	Sociodemographics	ORDERED-LOGISTIC	0.0891	0.0617	0.117	1.99e-10	38547	NA	NA
Volume	Kidney	6144#5	"Never eat eggs, dairy, wheat, sugar": I eat all of the above	Lifestyle and History	Lifestyle and environment	LOGISTIC-BINARY	-0.122	-0.16	-0.0844	2.22e-10	38114	31102	7012
Volume	Kidney	20161	Pack years of smoking	Lifestyle and History	Lifestyle and environment	LINEAR	0.0853	0.059	0.112	2.25e-10	9632	NA	NA
Volume	Kidney	25885	Volume of grey matter in Pallidum (right)	Physical Measures	Brain MRI	LINEAR	0.0632	0.0436	0.0828	2.78e-10	19587	NA	NA
Volume	Kidney	25003	Volume of ventricular cerebrospinal fluid (normalised for head size)	Physical Measures	Brain MRI	LINEAR	0.0551	0.038	0.0723	3.02e-10	19592	NA	NA
Volume	Kidney	30680	Calcium	Biological samples	Bone and joint	LINEAR	0.0503	0.0346	0.0659	3.02e-10	33034	NA	NA
Volume	Kidney	22678	Maximum carotid IMT (intima-medial thickness) at 210 degrees	Physical Measures	Carotid ultrasound	LINEAR	0.0554	0.0381	0.0727	3.46e-10	22743	NA	NA
Volume	Kidney	47	Hand grip strength (right)	Physical Measures	Hand grip strength	LINEAR	0.0306	0.0211	0.0402	3.59e-10	38562	NA	NA
Volume	Kidney	137	Number of treatments/medications taken	Medical history	Medications	ORDERED-LOGISTIC	0.0873	0.0596	0.115	6.94e-10	38674	NA	NA
Volume	Kidney	22034	Summed minutes activity	Lifestyle and History	Lifestyle and environment	LINEAR	0.0489	0.0334	0.0645	7.57e-10	32885	NA	NA
Volume	Kidney	25916	Volume of grey matter in Vermis IX Cerebellum	Physical Measures	Brain MRI	LINEAR	0.0614	0.0418	0.081	9.18e-10	19587	NA	NA
Volume	Kidney	6154#1	"Medication for pain relief, constipation, heartburn": Aspirin	Medical history	Health and medical history	LOGISTIC-BINARY	0.143	0.0971	0.189	9.72e-10	37911	4157	33754
Volume	Kidney	3063	Forced expiratory volume in 1-second (FEV1)	Physical Measures	Spirometry	LINEAR	0.0314	0.0213	0.0414	9.92e-10	35719	NA	NA
Volume	Kidney	25019	Volume of hippocampus (left)	Physical Measures	Brain MRI	LINEAR	0.0591	0.0402	0.0781	1.01e-09	19577	NA	NA
Volume	Kidney	1448-3	Bread type	Lifestyle and History	Lifestyle and environment	MULTINOMIAL-LOGISTIC	NA	NA	NA	1.28e-09	NA	NA	NA
Volume	Kidney	25870	Volume of grey matter in Heschl's Gyrus (includes H1 and H2) (left)	Physical Measures	Brain MRI	LINEAR	0.0562	0.038	0.0744	1.44e-09	19587	NA	NA
Volume	Kidney	25892	Volume of grey matter in Brain-Stem	Physical Measures	Brain MRI	LINEAR	0.056	0.0379	0.0742	1.52e-09	19587	NA	NA
Volume	Kidney	25866	Volume of grey matter in Parietal Operculum Cortex (left)	Physical Measures	Brain MRI	LINEAR	0.0569	0.0383	0.0754	1.88e-09	19587	NA	NA
Volume	Kidney	25847	Volume of grey matter in Frontal Orbital Cortex (right)	Physical Measures	Brain MRI	LINEAR	0.0541	0.0364	0.0718	2e-09	19587	NA	NA
Volume	Kidney	22032	IPAQ activity group	Lifestyle and History	Lifestyle and environment	ORDERED-LOGISTIC	0.0891	0.0596	0.119	3.35e-09	32885	NA	NA
Volume	Kidney	25815	Volume of grey matter in Postcentral Gyrus (right)	Physical Measures	Brain MRI	LINEAR	0.0569	0.0379	0.0758	4.15e-09	19587	NA	NA
Volume	Kidney	136	"Number of operations, self-reported"	Medical history	Operations	ORDERED-LOGISTIC	0.078	0.0518	0.104	4.97e-09	38667	NA	NA
Volume	Kidney	30090	Platelet crit	Biological samples	Platelets	LINEAR	0.0417	0.0277	0.0557	5.23e-09	36820	NA	NA
Volume	Kidney	1458	Cereal intake	Lifestyle and History	Lifestyle and environment	ORDERED-LOGISTIC	-0.0827	-0.111	-0.0549	5.48e-09	37014	NA	NA
Volume	Kidney	904	Number of days/week of vigorous physical activity 10+ minutes	Lifestyle and History	Lifestyle and environment	ORDERED-LOGISTIC	0.0779	0.0517	0.104	6.02e-09	37971	NA	NA
Volume	Kidney	100003	Protein	Online follow-up	Estimated nutrients yesterday	LINEAR	0.109	0.0718	0.145	7.32e-09	5729	NA	NA
Volume	Kidney	25903	Volume of grey matter in Crus II Cerebellum (left)	Physical Measures	Brain MRI	LINEAR	0.0558	0.0368	0.0749	8.95e-09	19587	NA	NA
Volume	Kidney	20150	"Forced expiratory volume in 1-second (FEV1), Best measure"	Physical Measures	Spirometry	LINEAR	0.0318	0.021	0.0427	9.05e-09	29663	NA	NA
Volume	Kidney	25902	Volume of grey matter in Crus I Cerebellum (right)	Physical Measures	Brain MRI	LINEAR	0.0535	0.0352	0.0719	1.04e-08	19587	NA	NA
Volume	Kidney	30100	Mean platelet (thrombocyte) volume	Biological samples	Platelets	LINEAR	-0.0432	-0.058	-0.0284	1.07e-08	36820	NA	NA
Volume	Kidney	22673	Minimum carotid IMT (intima-medial thickness) at 150 degrees	Physical Measures	Carotid ultrasound	LINEAR	0.0509	0.0334	0.0683	1.18e-08	22816	NA	NA
Volume	Kidney	1970	Nervous feelings	Lifestyle and History	Psychosocial factors	LOGISTIC-BINARY	-0.11	-0.148	-0.072	1.25e-08	37934	7603	30331
Volume	Kidney	4200	Position of the shoulder on the pulse waveform	Physical Measures	Arterial stiffness	LINEAR	0.0696	0.0456	0.0935	1.34e-08	12807	NA	NA
Volume	Kidney	30050	MCH	Biological samples	Red blood cells	LINEAR	0.0418	0.0273	0.0564	1.75e-08	36818	NA	NA
Volume	Kidney	20413	Frequency of inability to cease drinking in last year	Online follow-up	Alcohol use	ORDERED-LOGISTIC	0.209	0.136	0.282	1.77e-08	15721	NA	NA
Volume	Kidney	22675	Maximum carotid IMT (intima-medial thickness) at 150 degrees	Physical Measures	Carotid ultrasound	LINEAR	0.0495	0.0323	0.0668	1.91e-08	22816	NA	NA
Volume	Kidney	22038	MET minutes per week for moderate activity	Lifestyle and History	Lifestyle and environment	LINEAR	0.0444	0.0289	0.0599	2.08e-08	32885	NA	NA
Volume	Kidney	25856	"Volume of grey matter in Temporal Fusiform Cortex, posterior division (left)"	Physical Measures	Brain MRI	LINEAR	0.0508	0.0329	0.0686	2.57e-08	19587	NA	NA
Volume	Kidney	25842	Volume of grey matter in Precuneous Cortex (left)	Physical Measures	Brain MRI	LINEAR	0.0515	0.0334	0.0697	2.69e-08	19587	NA	NA
Volume	Kidney	25838	"Volume of grey matter in Cingulate Gyrus, anterior division (left)"	Physical Measures	Brain MRI	LINEAR	0.0551	0.0356	0.0746	3.16e-08	19587	NA	NA
Volume	Kidney	4198	Position of the pulse wave peak	Physical Measures	Arterial stiffness	LINEAR	0.0677	0.0437	0.0917	3.29e-08	12807	NA	NA
Volume	Kidney	30760	HDL cholesterol	Biological samples	Cardiovascular	LINEAR	-0.0372	-0.0505	-0.0239	3.83e-08	33022	NA	NA
Volume	Kidney	30770	IGF-1	Biological samples	Cancer	LINEAR	0.0402	0.0259	0.0546	4.03e-08	36002	NA	NA
Volume	Kidney	22033	Summed days activity	Lifestyle and History	Lifestyle and environment	LINEAR	0.0426	0.0272	0.0579	5.21e-08	33698	NA	NA
Volume	Kidney	102250	Sweet snack consumers	Online follow-up	Soup/snacks/pastries yesterday	LOGISTIC-BINARY	-0.211	-0.289	-0.134	8.17e-08	5726	3142	2584
Volume	Kidney	25839	"Volume of grey matter in Cingulate Gyrus, anterior division (right)"	Physical Measures	Brain MRI	LINEAR	0.0531	0.0336	0.0726	9.32e-08	19587	NA	NA
Volume	Kidney	25799	"Volume of grey matter in Superior Temporal Gyrus, anterior division (right)"	Physical Measures	Brain MRI	LINEAR	0.052	0.0329	0.0711	9.49e-08	19587	NA	NA
Volume	Kidney	25911	Volume of grey matter in VIIIa Cerebellum (right)	Physical Measures	Brain MRI	LINEAR	0.0512	0.0324	0.07	9.96e-08	19587	NA	NA
Volume	Kidney	1508-2	Coffee type	Lifestyle and History	Lifestyle and environment	MULTINOMIAL-LOGISTIC	NA	NA	NA	1.04e-07	NA	NA	NA
Volume	Kidney	1418-2	Milk type used	Lifestyle and History	Lifestyle and environment	MULTINOMIAL-LOGISTIC	NA	NA	NA	1.18e-07	NA	NA	NA
Volume	Kidney	25898	Volume of grey matter in Vermis VI Cerebellum	Physical Measures	Brain MRI	LINEAR	0.0523	0.0329	0.0718	1.37e-07	19587	NA	NA
Volume	Kidney	1170	Getting up in morning	Lifestyle and History	Lifestyle and environment	ORDERED-LOGISTIC	0.0753	0.0472	0.103	1.46e-07	38127	NA	NA
Volume	Kidney	1090	Time spent driving	Lifestyle and History	Lifestyle and environment	ORDERED-LOGISTIC	0.0901	0.0564	0.124	1.67e-07	24607	NA	NA
Volume	Kidney	25812	"Volume of grey matter in Inferior Temporal Gyrus, temporooccipital part (left)"	Physical Measures	Brain MRI	LINEAR	0.0512	0.032	0.0704	1.7e-07	19587	NA	NA
Volume	Kidney	1160	Sleep duration	Lifestyle and History	Lifestyle and environment	ORDERED-LOGISTIC	-0.0715	-0.0983	-0.0446	1.85e-07	38577	NA	NA
Volume	Kidney	25889	Volume of grey matter in Amygdala (right)	Physical Measures	Brain MRI	LINEAR	0.0469	0.0292	0.0647	2.25e-07	19587	NA	NA
Volume	Kidney	1130	Hands-free device/speakerphone use with mobile phone in last 3 month	Lifestyle and History	Lifestyle and environment	ORDERED-LOGISTIC	0.0996	0.0619	0.137	2.27e-07	33103	NA	NA
Volume	Kidney	20256	FEV1 Z-score	Physical Measures	Spirometry	LINEAR	-0.042	-0.058	-0.0261	2.43e-07	31781	NA	NA
Volume	Kidney	25918	Volume of grey matter in X Cerebellum (left)	Physical Measures	Brain MRI	LINEAR	0.049	0.0304	0.0677	2.47e-07	19587	NA	NA
Volume	Kidney	4196	Pulse wave peak to peak time	Physical Measures	Arterial stiffness	LINEAR	-0.0634	-0.0876	-0.0393	2.51e-07	12802	NA	NA
Volume	Kidney	25833	Volume of grey matter in Juxtapositional Lobule Cortex (formerly Supplementary Motor Cortex) (right)	Physical Measures	Brain MRI	LINEAR	0.0507	0.0314	0.0701	2.77e-07	19587	NA	NA
Volume	Kidney	12680	Central augmentation pressure during PWA	Physical Measures	Heart MRI	LINEAR	0.0374	0.023	0.0517	3.31e-07	33655	NA	NA
Volume	Kidney	25814	Volume of grey matter in Postcentral Gyrus (left)	Physical Measures	Brain MRI	LINEAR	0.049	0.0302	0.0678	3.38e-07	19587	NA	NA
Volume	Kidney	20401	Ever addicted to any substance or behaviour	Online follow-up	Addictions	LOGISTIC-BINARY	0.194	0.12	0.269	3.48e-07	26521	1487	25034
Volume	Kidney	25906	Volume of grey matter in VIIb Cerebellum (left)	Physical Measures	Brain MRI	LINEAR	0.0495	0.0304	0.0685	3.8e-07	19587	NA	NA
Volume	Kidney	30280	Immature reticulocyte fraction	Biological samples	Red blood cells	LINEAR	0.0374	0.0229	0.0518	3.86e-07	36185	NA	NA
Volume	Kidney	21021	Pulse wave Arterial Stiffness index	Physical Measures	Arterial stiffness	LINEAR	0.0611	0.0375	0.0847	3.96e-07	12792	NA	NA
Volume	Kidney	25807	"Volume of grey matter in Middle Temporal Gyrus, temporooccipital part (right)"	Physical Measures	Brain MRI	LINEAR	0.0487	0.0299	0.0676	4.26e-07	19587	NA	NA
Volume	Kidney	25900	Volume of grey matter in Crus I Cerebellum (left)	Physical Measures	Brain MRI	LINEAR	0.0482	0.0295	0.0669	4.4e-07	19587	NA	NA
Volume	Kidney	20003#1141188442	Treatment/medication code: glucosamine product	Medical history	Medications	LOGISTIC-BINARY	0.142	0.0868	0.197	4.74e-07	38674	3003	35671
Volume	Kidney	25804	"Volume of grey matter in Middle Temporal Gyrus, posterior division (left)"	Physical Measures	Brain MRI	LINEAR	0.0482	0.0294	0.067	5.29e-07	19587	NA	NA
Volume	Kidney	25876	Volume of grey matter in Occipital Pole (left)	Physical Measures	Brain MRI	LINEAR	0.0475	0.0289	0.0661	5.88e-07	19587	NA	NA
Volume	Kidney	25803	"Volume of grey matter in Middle Temporal Gyrus, anterior division (right)"	Physical Measures	Brain MRI	LINEAR	0.0486	0.0295	0.0676	6.12e-07	19587	NA	NA
Volume	Kidney	25811	"Volume of grey matter in Inferior Temporal Gyrus, posterior division (right)"	Physical Measures	Brain MRI	LINEAR	0.0482	0.0292	0.0672	6.68e-07	19587	NA	NA
Volume	Kidney	864	Number of days/week walked 10+ minutes	Lifestyle and History	Lifestyle and environment	ORDERED-LOGISTIC	0.0666	0.0402	0.093	7.89e-07	38431	NA	NA
Volume	Kidney	23119	Arm fat percentage (right)	Physical Measures	Impedance	LINEAR	0.0175	0.0106	0.0245	7.92e-07	38188	NA	NA
Volume	Kidney	25786	Volume of grey matter in Superior Frontal Gyrus (left)	Physical Measures	Brain MRI	LINEAR	0.048	0.0289	0.067	8.2e-07	19587	NA	NA
Volume	Kidney	25877	Volume of grey matter in Occipital Pole (right)	Physical Measures	Brain MRI	LINEAR	0.0452	0.0272	0.0633	9.03e-07	19587	NA	NA
Volume	Kidney	12679	Number of beats in waveform average for PWA	Physical Measures	Heart MRI	LINEAR	0.0382	0.0229	0.0534	9.21e-07	33879	NA	NA
Volume	Kidney	20003#1140861954	Treatment/medication code: fenofibrate	Medical history	Medications	LOGISTIC-BINARY	0.995	0.587	1.38	9.83e-07	38674	36	38638
Volume	Kidney	20549#4	Substances taken for anxiety: Drugs or alcohol (more than once)	Online follow-up	Anxiety	LOGISTIC-BINARY	0.191	0.115	0.268	1.02e-06	26702	1406	25296
Volume	Kidney	25860	Volume of grey matter in Occipital Fusiform Gyrus (left)	Physical Measures	Brain MRI	LINEAR	0.0463	0.0277	0.0649	1.07e-06	19587	NA	NA
Volume	Kidney	25825	"Volume of grey matter in Lateral Occipital Cortex, superior division (right)"	Physical Measures	Brain MRI	LINEAR	0.0458	0.0272	0.0643	1.37e-06	19587	NA	NA
Volume	Kidney	894	Duration of moderate activity	Lifestyle and History	Lifestyle and environment	ORDERED-LOGISTIC	0.0751	0.0446	0.106	1.38e-06	30252	NA	NA
Volume	Kidney	25805	"Volume of grey matter in Middle Temporal Gyrus, posterior division (right)"	Physical Measures	Brain MRI	LINEAR	0.0465	0.0275	0.0654	1.59e-06	19587	NA	NA
Volume	Kidney	23123	Arm fat percentage (left)	Physical Measures	Impedance	LINEAR	0.0168	0.00992	0.0236	1.6e-06	38184	NA	NA
Volume	Kidney	51	Seated height	Physical Measures	Body size measures	LINEAR	0.0207	0.0122	0.0292	1.66e-06	38130	NA	NA
Volume	Kidney	20003#1140861958	Treatment/medication code: simvastatin	Medical history	Medications	LOGISTIC-BINARY	0.129	0.0759	0.181	1.71e-06	38674	2955	35719
Volume	Kidney	20258	FEV1/FVC Z-score	Physical Measures	Spirometry	LINEAR	-0.0388	-0.0548	-0.0229	1.73e-06	31781	NA	NA
Volume	Kidney	25882	Volume of grey matter in Putamen (left)	Physical Measures	Brain MRI	LINEAR	0.048	0.0283	0.0676	1.79e-06	19587	NA	NA
Volume	Kidney	25864	Volume of grey matter in Central Opercular Cortex (left)	Physical Measures	Brain MRI	LINEAR	0.0437	0.0257	0.0616	1.84e-06	19587	NA	NA
Volume	Kidney	25917	Volume of grey matter in IX Cerebellum (right)	Physical Measures	Brain MRI	LINEAR	0.0473	0.0279	0.0667	1.84e-06	19587	NA	NA
Volume	Kidney	100240	Coffee consumed	Online follow-up	Hot/cold beverages yesterday	LOGISTIC-BINARY	0.206	0.121	0.291	2.06e-06	5726	4068	1658
Volume	Kidney	1309	Fresh fruit intake	Lifestyle and History	Lifestyle and environment	ORDERED-LOGISTIC	0.066	0.0386	0.0934	2.3e-06	37331	NA	NA
Volume	Kidney	25888	Volume of grey matter in Amygdala (left)	Physical Measures	Brain MRI	LINEAR	0.0428	0.0251	0.0606	2.32e-06	19587	NA	NA
Volume	Kidney	20003#1140874744	Glicazide	Medical history	Medications	LOGISTIC-BINARY	0.459	0.267	0.649	2.52e-06	38674	168	38506
Volume	Kidney	25824	"Volume of grey matter in Lateral Occipital Cortex, superior division (left)"	Physical Measures	Brain MRI	LINEAR	0.0452	0.0263	0.0641	2.87e-06	19587	NA	NA
Volume	Kidney	20003#1140870956	Treatment/medication code: alfacalcidol	Medical history	Medications	LOGISTIC-BINARY	-1.12	-1.55	-0.595	2.93e-06	38674	17	38657
Volume	Kidney	25827	"Volume of grey matter in Lateral Occipital Cortex, inferior division (right)"	Physical Measures	Brain MRI	LINEAR	0.0438	0.0254	0.0622	3.17e-06	19587	NA	NA
Volume	Kidney	6160#3	Leisure/social activities: Religious group	Lifestyle and History	Psychosocial factors	LOGISTIC-BINARY	-0.0975	-0.139	-0.0563	3.46e-06	38620	5954	32666
Volume	Kidney	1349	Processed meat intake	Lifestyle and History	Lifestyle and environment	ORDERED-LOGISTIC	0.0625	0.0361	0.0889	3.46e-06	38642	NA	NA
Volume	Kidney	21043	Least number of times bowels opened per week	Online follow-up	Digestive health	ORDERED-LOGISTIC	0.0737	0.0425	0.105	3.72e-06	29969	NA	NA
Volume	Kidney	25808	"Volume of grey matter in Inferior Temporal Gyrus, anterior division (left)"	Physical Measures	Brain MRI	LINEAR	0.0451	0.026	0.0643	3.81e-06	19587	NA	NA
Volume	Kidney	22039	Vigorous activity	Lifestyle and History	Lifestyle and environment	ORDERED-LOGISTIC	0.0684	0.0393	0.0974	3.96e-06	32885	NA	NA
Volume	Kidney	884	Number of days/week of moderate physical activity 10+ minutes	Lifestyle and History	Lifestyle and environment	ORDERED-LOGISTIC	0.0606	0.0348	0.0863	4.07e-06	37745	NA	NA
Volume	Kidney	25920	Volume of grey matter in X Cerebellum (right)	Physical Measures	Brain MRI	LINEAR	0.0437	0.025	0.0624	4.45e-06	19587	NA	NA
Volume	Kidney	943	Frequency of stair climbing in last 4 weeks	Lifestyle and History	Lifestyle and environment	ORDERED-LOGISTIC	0.0615	0.0352	0.0878	4.68e-06	38043	NA	NA
Volume	Kidney	100013	Vitamin B12	Online follow-up	Estimated nutrients yesterday	LINEAR	0.0873	0.0499	0.125	4.76e-06	5729	NA	NA
Volume	Kidney	22035	Above moderate/vigorous recommendation	Lifestyle and History	Lifestyle and environment	LOGISTIC-BINARY	0.0736	0.0418	0.105	5.66e-06	32885	17759	15126
Volume	Kidney	100270	Filtered coffee intake	Online follow-up	Hot/cold beverages yesterday	ORDERED-LOGISTIC	0.217	0.123	0.31	6.06e-06	5718	NA	NA
Volume	Kidney	20086#11	Type of special diet followed: Vegetarian	Online follow-up	Typical diet yesterday	LOGISTIC-BINARY	-0.448	-0.641	-0.252	6.25e-06	5726	230	5496
Volume	Kidney	12681	Augmentation index for PWA	Physical Measures	Heart MRI	LINEAR	0.034	0.0192	0.0487	6.29e-06	33874	NA	NA
Volume	Kidney	1070	Time spent watching TV	Lifestyle and History	Lifestyle and environment	ORDERED-LOGISTIC	-0.062	-0.089	-0.0351	6.51e-06	35925	NA	NA
Volume	Kidney	6155#3	Vitamin and mineral supplements: Vitamin C	Medical history	Health and medical history	LOGISTIC-BINARY	0.123	0.0696	0.177	6.66e-06	38077	3118	34959
Volume	Kidney	25915	Volume of grey matter in IX Cerebellum (left)	Physical Measures	Brain MRI	LINEAR	0.0446	0.0252	0.0641	7.14e-06	19587	NA	NA
Volume	Kidney	20522	Been in a confiding relationship as an adult	Online follow-up	Traumatic events	ORDERED-LOGISTIC	0.076	0.0427	0.109	7.64e-06	26227	NA	NA
Volume	Kidney	2010	Suffer from 'nerves'	Lifestyle and History	Psychosocial factors	LOGISTIC-BINARY	-0.0876	-0.126	-0.0492	7.68e-06	37578	6798	30780
Volume	Kidney	21042	Greatest number of times bowels opened per day	Online follow-up	Digestive health	ORDERED-LOGISTIC	0.0709	0.0397	0.102	8.26e-06	30088	NA	NA
Volume	Kidney	25794	Volume of grey matter in Precentral Gyrus (left)	Physical Measures	Brain MRI	LINEAR	0.0414	0.0232	0.0595	8.45e-06	19587	NA	NA
Volume	Kidney	1538-0	Major dietary changes in the last 5 years	Lifestyle and History	Lifestyle and environment	MULTINOMIAL-LOGISTIC	NA	NA	NA	8.91e-06	NA	NA	NA
Volume	Kidney	78	"Heel bone mineral density (BMD) T-score, automated"	Physical Measures	Bone-densitometry of heel	LINEAR	-0.0437	-0.063	-0.0244	9.1e-06	20747	NA	NA
Volume	Kidney	3147	"Heel quantitative ultrasound index (QUI), direct entry"	Physical Measures	Bone-densitometry of heel	LINEAR	-0.0437	-0.063	-0.0244	9.11e-06	20747	NA	NA
Volume	Kidney	21060	Tired	Online follow-up	Digestive health	ORDERED-LOGISTIC	-0.0718	-0.104	-0.0401	9.15e-06	30162	NA	NA
Volume	Kidney	25809	"Volume of grey matter in Inferior Temporal Gyrus, anterior division (right)"	Physical Measures	Brain MRI	LINEAR	0.0433	0.0241	0.0624	9.33e-06	19587	NA	NA
Volume	Kidney	6155#100	Vitamin and mineral supplements	Medical history	Health and medical history	LOGISTIC-BINARY	-0.0726	-0.105	-0.0405	9.41e-06	38077	26248	11829
Volume	Kidney	3144	"Heel Broadband ultrasound attenuation, direct entry"	Physical Measures	Bone-densitometry of heel	LINEAR	-0.0424	-0.0612	-0.0235	1.03e-05	20747	NA	NA
Volume	Kidney	21064	Sensitive stomach	Online follow-up	Digestive health	LOGISTIC-BINARY	-0.0978	-0.141	-0.0543	1.06e-05	27767	5807	21960
Volume	Kidney	25810	"Volume of grey matter in Inferior Temporal Gyrus, posterior division (left)"	Physical Measures	Brain MRI	LINEAR	0.0424	0.0234	0.0613	1.14e-05	19587	NA	NA
Volume	Kidney	12654	Number of automated diagnostic comments recorded during 12-lead ECG	Physical Measures	ECG at rest	ORDERED-LOGISTIC	0.0651	0.036	0.0941	1.15e-05	33667	NA	NA
Volume	Kidney	100016	Potassium	Online follow-up	Estimated nutrients yesterday	LINEAR	0.0831	0.0459	0.12	1.18e-05	5729	NA	NA
Volume	Kidney	2306	Weight change compared with 1 year ago	Medical history	Health and medical history	ORDERED-LOGISTIC	-0.0652	-0.0944	-0.0359	1.26e-05	38233	NA	NA
Volume	Kidney	2926	Number of unsuccessful stop-smoking attempts	Lifestyle and History	Lifestyle and environment	ORDERED-LOGISTIC	0.127	0.0696	0.184	1.4e-05	7859	NA	NA
Volume	Kidney	25854	"Volume of grey matter in Temporal Fusiform Cortex, anterior division (left)"	Physical Measures	Brain MRI	LINEAR	0.0404	0.0222	0.0587	1.43e-05	19587	NA	NA
Volume	Kidney	3148	Heel bone mineral density (BMD)	Physical Measures	Bone-densitometry of heel	LINEAR	-0.0426	-0.0619	-0.0233	1.5e-05	20738	NA	NA
Volume	Kidney	25782	Volume of grey matter in Frontal Pole (left)	Physical Measures	Brain MRI	LINEAR	0.0379	0.0206	0.0551	1.72e-05	19587	NA	NA
Volume	Kidney	25909	Volume of grey matter in VIIIa Cerebellum (left)	Physical Measures	Brain MRI	LINEAR	0.041	0.0222	0.0598	1.96e-05	19587	NA	NA
Volume	Kidney	2664-05-01	Reason for reducing amount of alcohol drunk	Lifestyle and History	Lifestyle and environment	MULTINOMIAL-LOGISTIC	NA	NA	NA	1.97e-05	NA	NA	NA
Volume	Spleen	30110	PDW	Biological samples	Platelets	LINEAR	0.277	0.265	0.289	1e-300	36820	NA	NA
Volume	Spleen	30250	RC	Biological samples	Red blood cells	LINEAR	0.25	0.238	0.261	1e-300	36184	NA	NA
Volume	Spleen	30270	MSCV	Biological samples	Red blood cells	LINEAR	-0.323	-0.335	-0.31	1e-300	36185	NA	NA
Volume	Spleen	30750	HbA1c	Biological samples	Diabetes	LINEAR	-0.229	-0.241	-0.217	1e-300	35925	NA	NA
Volume	Spleen	30240	Reticulocyte percentage	Biological samples	Red blood cells	LINEAR	0.226	0.214	0.238	1e-300	36185	NA	NA
Volume	Spleen	30300	HLSRC	Biological samples	Red blood cells	LINEAR	0.21	0.198	0.221	2.27e-273	36184	NA	NA
Volume	Spleen	30090	Platelet crit	Biological samples	Platelets	LINEAR	-0.206	-0.217	-0.194	1.67e-255	36820	NA	NA
Volume	Spleen	30080	Platelet count	Biological samples	Platelets	LINEAR	-0.199	-0.211	-0.187	1.18e-229	36820	NA	NA
Volume	Spleen	30760	HDL cholesterol	Biological samples	Cardiovascular	LINEAR	-0.182	-0.193	-0.171	2.06e-224	33022	NA	NA
Volume	Spleen	30040	MCV	Biological samples	Red blood cells	LINEAR	-0.199	-0.211	-0.187	2.65e-221	36819	NA	NA
Volume	Spleen	30290	High light scatter reticulocyte percentage	Biological samples	Red blood cells	LINEAR	0.188	0.176	0.2	6.15e-213	36185	NA	NA
Volume	Spleen	30260	Mean reticulocyte volume	Biological samples	Red blood cells	LINEAR	-0.191	-0.204	-0.179	4.5e-196	36185	NA	NA
Volume	Spleen	30010	Red blood cell (erythrocyte) count	Biological samples	Red blood cells	LINEAR	0.14	0.13	0.15	2.31e-157	36819	NA	NA
Volume	Spleen	30720	Cystatin C	Biological samples	Renal	LINEAR	0.141	0.13	0.152	6.21e-140	36180	NA	NA
Volume	Spleen	30840	Total bilirubin	Biological samples	Liver	LINEAR	0.15	0.138	0.162	9.94e-133	36016	NA	NA
Volume	Spleen	30630	Apolipoprotein A	Biological samples	Cardiovascular	LINEAR	-0.145	-0.157	-0.133	9.4e-131	32850	NA	NA
Volume	Spleen	30130	Monocyte count	Biological samples	White blood cells	LINEAR	-0.143	-0.155	-0.131	8.15e-119	36762	NA	NA
Volume	Spleen	30120	Lymphocyte count	Biological samples	White blood cells	LINEAR	-0.145	-0.157	-0.133	3.32e-118	36762	NA	NA
Volume	Spleen	30060	MCH concentration	Biological samples	Red blood cells	LINEAR	0.133	0.121	0.145	1.44e-98	36818	NA	NA
Volume	Spleen	30200	Neutrophill percentage	Biological samples	White blood cells	LINEAR	0.131	0.119	0.144	9.94e-94	36763	NA	NA
Volume	Spleen	30870	Triglycerides	Biological samples	Cardiovascular	LINEAR	0.119	0.108	0.131	1.41e-90	36157	NA	NA
Volume	Spleen	30660	Direct bilirubin	Biological samples	Liver	LINEAR	0.129	0.116	0.141	5.51e-87	31320	NA	NA
Volume	Spleen	30190	Monocyte percentage	Biological samples	White blood cells	LINEAR	-0.12	-0.132	-0.108	8.45e-84	36763	NA	NA
Volume	Spleen	30020	Heamoglobin conc.	Biological samples	Red blood cells	LINEAR	0.0877	0.0781	0.0972	2.33e-72	36820	NA	NA
Volume	Spleen	30180	Lymphocyte percentage	Biological samples	White blood cells	LINEAR	-0.114	-0.127	-0.102	2.53e-72	36763	NA	NA
Volume	Spleen	23105	Basal metabolic rate	Physical Measures	Impedance	LINEAR	0.0349	0.0309	0.039	5.41e-64	38201	NA	NA
Volume	Spleen	23106	Whole body	Physical Measures	Impedance	LINEAR	-0.0644	-0.0719	-0.0568	1.65e-62	38200	NA	NA
Volume	Spleen	23101	Whole body FF mass	Physical Measures	Impedance	LINEAR	0.037	0.0326	0.0414	1.65e-61	38202	NA	NA
Volume	Spleen	23102	Whole body water mass	Physical Measures	Impedance	LINEAR	0.0371	0.0327	0.0415	6.26e-61	38202	NA	NA
Volume	Spleen	23121	R arm FF mass	Physical Measures	Impedance	LINEAR	0.04	0.0352	0.0448	1.05e-60	38184	NA	NA
Volume	Spleen	23122	R arm pred. mass	Physical Measures	Impedance	LINEAR	0.0396	0.0349	0.0444	9.15e-60	38184	NA	NA
Volume	Spleen	23118	Leg predicted mass (left)	Physical Measures	Impedance	LINEAR	0.0362	0.0319	0.0406	3.7e-59	38190	NA	NA
Volume	Spleen	30050	MCH	Biological samples	Red blood cells	LINEAR	-0.102	-0.114	-0.0894	1.06e-58	36818	NA	NA
Volume	Spleen	23117	Leg fat-free mass (left)	Physical Measures	Impedance	LINEAR	0.0361	0.0318	0.0405	1.28e-58	38190	NA	NA
Volume	Spleen	30880	Urate	Biological samples	Renal	LINEAR	0.079	0.0693	0.0888	4.36e-57	36139	NA	NA
Volume	Spleen	23109	R arm	Physical Measures	Impedance	LINEAR	-0.0579	-0.0652	-0.0505	1.58e-53	38196	NA	NA
Volume	Spleen	23110	L arm	Physical Measures	Impedance	LINEAR	-0.0566	-0.0639	-0.0492	4.77e-51	38198	NA	NA
Volume	Spleen	23113	Leg fat-free mass (right)	Physical Measures	Impedance	LINEAR	0.0346	0.03	0.0392	5.76e-50	38195	NA	NA
Volume	Spleen	23114	Leg predicted mass (right)	Physical Measures	Impedance	LINEAR	0.0343	0.0298	0.0388	1.6e-49	38195	NA	NA
Volume	Spleen	23129	Trunk fat-free mass	Physical Measures	Impedance	LINEAR	0.0354	0.0305	0.0402	6.02e-47	38156	NA	NA
Volume	Spleen	23126	Arm predicted mass (left)	Physical Measures	Impedance	LINEAR	0.0346	0.0299	0.0393	6.81e-47	38178	NA	NA
Volume	Spleen	21001	Body mass index (BMI)	Physical Measures	Body size measures	LINEAR	0.0422	0.0364	0.048	1.27e-46	38627	NA	NA
Volume	Spleen	23125	Arm fat-free mass (left)	Physical Measures	Impedance	LINEAR	0.0343	0.0296	0.039	3.77e-46	38180	NA	NA
Volume	Spleen	23130	Trunk predicted mass	Physical Measures	Impedance	LINEAR	0.0351	0.0303	0.0399	3.87e-46	38153	NA	NA
Volume	Spleen	23108	L leg	Physical Measures	Impedance	LINEAR	-0.0681	-0.0775	-0.0588	4.75e-46	38199	NA	NA
Volume	Spleen	21002	Weight	Physical Measures	Body size measures	LINEAR	0.0318	0.0274	0.0363	2.41e-44	38632	NA	NA
Volume	Spleen	23107	R leg	Physical Measures	Impedance	LINEAR	-0.0626	-0.0718	-0.0533	6.93e-40	38201	NA	NA
Volume	Spleen	30690	Cholesterol	Biological samples	Cardiovascular	LINEAR	-0.0828	-0.0953	-0.0703	1.74e-38	36183	NA	NA
Volume	Spleen	30600	Albumin	Biological samples	Liver	LINEAR	0.0786	0.0657	0.0915	1.13e-32	33034	NA	NA
Volume	Spleen	30620	ALT	Biological samples	Liver	LINEAR	0.0684	0.0571	0.0798	3.06e-32	36177	NA	NA
Volume	Spleen	48	Waist circumference	Physical Measures	Body size measures	LINEAR	0.0367	0.0302	0.0432	1.92e-28	38648	NA	NA
Volume	Spleen	23112	Leg fat mass (right)	Physical Measures	Impedance	LINEAR	0.0291	0.0238	0.0344	6.65e-27	38197	NA	NA
Volume	Spleen	23116	Leg fat mass (left)	Physical Measures	Impedance	LINEAR	0.0283	0.0231	0.0335	1.09e-26	38194	NA	NA
Volume	Spleen	30860	Total protein	Biological samples	Renal	LINEAR	-0.0672	-0.0803	-0.054	1.45e-23	32990	NA	NA
Volume	Spleen	30830	SHBG	Biological samples	Cancer	LINEAR	-0.0559	-0.0669	-0.045	1.88e-23	32708	NA	NA
Volume	Spleen	30850	Testosterone	Biological samples	Cancer	LINEAR	-0.0354	-0.0433	-0.0276	8e-19	33198	NA	NA
Volume	Spleen	30610	ALP	Biological samples	Bone and joint	LINEAR	0.0545	0.0422	0.0668	4.35e-18	36184	NA	NA
Volume	Spleen	30220	Basophill percentage	Biological samples	White blood cells	LINEAR	-0.0553	-0.0679	-0.0427	7.46e-18	36763	NA	NA
Volume	Spleen	30000	White blood cell (leukocyte) count	Biological samples	White blood cells	LINEAR	-0.0525	-0.0648	-0.0402	5.94e-17	36819	NA	NA
Volume	Spleen	30030	Haematocrit percentage	Biological samples	Red blood cells	LINEAR	0.0421	0.0323	0.052	5.98e-17	36819	NA	NA
Volume	Spleen	23124	Arm fat mass (left)	Physical Measures	Impedance	LINEAR	0.0274	0.0208	0.0339	2.88e-16	38181	NA	NA
Volume	Spleen	1329	Oily fish intake	Lifestyle and History	Lifestyle and environment	ORDERED-LOGISTIC	-0.0944	-0.117	-0.0717	3.91e-16	38600	NA	NA
Volume	Spleen	30780	LDL direct	Biological samples	Cardiovascular	LINEAR	-0.0523	-0.0649	-0.0397	5.24e-16	36105	NA	NA
Volume	Spleen	23120	Arm fat mass (right)	Physical Measures	Impedance	LINEAR	0.0257	0.0191	0.0322	1.62e-14	38186	NA	NA
Volume	Spleen	3143	Ankle spacing width	Physical Measures	Bone-densitometry of heel	LINEAR	0.0438	0.0325	0.0551	2.78e-14	20747	NA	NA
Volume	Spleen	23100	Whole body fat mass	Physical Measures	Impedance	LINEAR	0.0251	0.0185	0.0318	1.53e-13	38155	NA	NA
Volume	Spleen	30070	EDW	Biological samples	Red blood cells	LINEAR	-0.0468	-0.0593	-0.0343	2.15e-13	36819	NA	NA
Volume	Spleen	30160	Basophill count	Biological samples	White blood cells	ORDERED-LOGISTIC	-0.0827	-0.106	-0.0593	4.75e-12	36762	NA	NA
Volume	Spleen	22133	Sarcoidosis	Online follow-up	Medical information	LOGISTIC-BINARY	0.507	0.35	0.648	1.75e-11	21525	94	21431
Volume	Spleen	2443	Diabetes	Medical history	Health and medical history	LOGISTIC-BINARY	0.195	0.134	0.253	1.43e-10	38619	1024	37595
Volume	Spleen	30730	GGT	Biological samples	Liver	LINEAR	0.0364	0.0252	0.0476	2.2e-10	36164	NA	NA
Volume	Spleen	20004#1453	Splenectomy	Medical history	Operations	LOGISTIC-BINARY	-6.29	-8.6	-4.61	2.21e-10	38674	11	38663
Volume	Spleen	30280	Immature reticulocyte fraction	Biological samples	Red blood cells	LINEAR	0.0368	0.0245	0.049	4.25e-09	36185	NA	NA
Volume	Spleen	12681	Augmentation index for PWA	Physical Measures	Heart MRI	LINEAR	0.0362	0.0237	0.0487	1.39e-08	33874	NA	NA
Volume	Spleen	12680	Central augmentation pressure during PWA	Physical Measures	Heart MRI	LINEAR	0.0346	0.0225	0.0468	2.47e-08	33655	NA	NA
Volume	Spleen	30530	Sodium in urine	Biological samples	Renal (urine)	LINEAR	0.0333	0.0215	0.0451	3.32e-08	37378	NA	NA
Volume	Spleen	20003#1140875408	Allopurinol	Medical history	Medications	LOGISTIC-BINARY	0.25	0.158	0.336	3.66e-08	38674	292	38382
Volume	Spleen	2734	Number of live births	Lifestyle and History	Sex-specific factors	ORDERED-LOGISTIC	0.111	0.0707	0.15	5.61e-08	20021	NA	NA
Volume	Spleen	136	"Number of operations, self-reported"	Medical history	Operations	ORDERED-LOGISTIC	0.0587	0.0366	0.0808	1.95e-07	38667	NA	NA
Volume	Spleen	20003#1140879778	Treatment/medication code: doxazosin	Medical history	Medications	LOGISTIC-BINARY	0.262	0.16	0.358	2.23e-07	38674	260	38414
Volume	Spleen	22506-114	Tobacco smoking	Online follow-up	Medical information	MULTINOMIAL-LOGISTIC	NA	NA	NA	4.26e-07	NA	NA	NA
Volume	Spleen	30710	C-reactive protein	Biological samples	Cardiovascular	LINEAR	0.0298	0.0182	0.0414	4.58e-07	36109	NA	NA
Volume	Spleen	22680	Mean carotid IMT (intima-medial thickness) at 240 degrees	Physical Measures	Carotid ultrasound	LINEAR	0.0373	0.0225	0.052	7.41e-07	22572	NA	NA
Volume	Spleen	30500	Microalbumin in urine	Biological samples	Renal (urine)	LINEAR	0.0557	0.0336	0.0778	7.81e-07	9647	NA	NA
Volume	Spleen	1220	Daytime sleeping	Lifestyle and History	Lifestyle and environment	ORDERED-LOGISTIC	0.0743	0.0448	0.104	7.86e-07	38611	NA	NA
Volume	Spleen	20003#1140866738	Treatment/medication code: atenolol	Medical history	Medications	LOGISTIC-BINARY	0.162	0.095	0.226	1.37e-06	38674	885	37789
Volume	Spleen	20090#380	Dairy spread used in cooking	Online follow-up	Spreads/sauces/cooking oils yesterday	LOGISTIC-BINARY	0.573	0.327	0.802	1.74e-06	5726	54	5672
Volume	Spleen	23128	Trunk fat mass	Physical Measures	Impedance	LINEAR	0.0177	0.0104	0.025	2.13e-06	38164	NA	NA
Volume	Spleen	2237	Plays computer games	Lifestyle and History	Lifestyle and environment	ORDERED-LOGISTIC	0.0684	0.0401	0.0968	2.26e-06	38666	NA	NA
Volume	Spleen	20116-0	Smoking status	Lifestyle and History	Lifestyle and environment	MULTINOMIAL-LOGISTIC	NA	NA	NA	2.66e-06	NA	NA	NA
Volume	Spleen	22679	Minimum carotid IMT (intima-medial thickness) at 240 degrees	Physical Measures	Carotid ultrasound	LINEAR	0.0357	0.0206	0.0508	3.84e-06	22572	NA	NA
Volume	Spleen	25856	"Volume of grey matter in Temporal Fusiform Cortex, posterior division (left)"	Physical Measures	Brain MRI	LINEAR	0.0354	0.0201	0.0506	5.53e-06	19587	NA	NA
Volume	Spleen	22671	Mean carotid IMT (intima-medial thickness) at 120 degrees	Physical Measures	Carotid ultrasound	LINEAR	0.0335	0.0189	0.0482	7.24e-06	22733	NA	NA
Volume	Spleen	51	Seated height	Physical Measures	Body size measures	LINEAR	0.0164	0.00919	0.0236	8.25e-06	38130	NA	NA
Volume	Spleen	30100	Mean platelet (thrombocyte) volume	Biological samples	Platelets	LINEAR	0.0285	0.0159	0.0411	9.03e-06	36820	NA	NA
Volume	Spleen	1428-3	Spread type	Lifestyle and History	Lifestyle and environment	MULTINOMIAL-LOGISTIC	NA	NA	NA	9.14e-06	NA	NA	NA
Volume	Spleen	1249	Past tobacco smoking	Lifestyle and History	Lifestyle and environment	ORDERED-LOGISTIC	-0.0517	-0.075	-0.0285	1.28e-05	37033	NA	NA
Volume	Spleen	21035	Currently (in last 3 months) suffer from abdominal pain	Online follow-up	Digestive health	LOGISTIC-BINARY	0.0708	0.0385	0.103	1.69e-05	30115	8361	21754
Volume	Lungs	20257	FVC Z-score	Physical Measures	Spirometry	LINEAR	-0.298	-0.312	-0.283	1e-300	31781	NA	NA
Volume	Lungs	20258	FEV1/FVC Z-score	Physical Measures	Spirometry	LINEAR	0.432	0.418	0.446	1e-300	31781	NA	NA
Volume	Lungs	3062	FVC	Physical Measures	Spirometry	LINEAR	0.183	0.175	0.192	1e-300	35719	NA	NA
Volume	Lungs	20151	"FVC, Best measure"	Physical Measures	Spirometry	LINEAR	0.18	0.171	0.189	1e-300	29663	NA	NA
Volume	Lungs	23099	Body fat %	Physical Measures	Impedance	LINEAR	-0.1	-0.107	-0.0938	5.04e-189	38184	NA	NA
Volume	Lungs	23127	Trunk fat percentage	Physical Measures	Impedance	LINEAR	-0.13	-0.138	-0.121	8.9e-186	38167	NA	NA
Volume	Lungs	23128	Trunk fat mass	Physical Measures	Impedance	LINEAR	-0.108	-0.116	-0.1	5.37e-155	38164	NA	NA
Volume	Lungs	23100	Whole body fat mass	Physical Measures	Impedance	LINEAR	-0.0956	-0.103	-0.0884	1.02e-145	38155	NA	NA
Volume	Lungs	23106	Whole body	Physical Measures	Impedance	LINEAR	-0.102	-0.11	-0.0935	1.98e-128	38200	NA	NA
Volume	Lungs	23111	Leg fat percentage (right)	Physical Measures	Impedance	LINEAR	-0.0676	-0.073	-0.0621	3.24e-128	38199	NA	NA
Volume	Lungs	23115	Leg fat percentage (left)	Physical Measures	Impedance	LINEAR	-0.065	-0.0704	-0.0597	3.31e-124	38194	NA	NA
Volume	Lungs	1239	Current tobacco smoking	Lifestyle and History	Lifestyle and environment	ORDERED-LOGISTIC	0.552	0.505	0.599	6.05e-117	38660	NA	NA
Volume	Lungs	23123	Arm fat percentage (left)	Physical Measures	Impedance	LINEAR	-0.0743	-0.0807	-0.068	1.68e-116	38184	NA	NA
Volume	Lungs	20116-0	Smoking status	Lifestyle and History	Lifestyle and environment	MULTINOMIAL-LOGISTIC	NA	NA	NA	3.3e-115	NA	NA	NA
Volume	Lungs	23107	R leg	Physical Measures	Impedance	LINEAR	-0.116	-0.126	-0.106	1.17e-111	38201	NA	NA
Volume	Lungs	23119	Arm fat percentage (right)	Physical Measures	Impedance	LINEAR	-0.0739	-0.0803	-0.0675	1.98e-111	38188	NA	NA
Volume	Lungs	23108	L leg	Physical Measures	Impedance	LINEAR	-0.117	-0.127	-0.106	4.3e-110	38199	NA	NA
Volume	Lungs	23112	Leg fat mass (right)	Physical Measures	Impedance	LINEAR	-0.0619	-0.0677	-0.0561	1.39e-96	38197	NA	NA
Volume	Lungs	30870	Triglycerides	Biological samples	Cardiovascular	LINEAR	-0.135	-0.148	-0.123	1.87e-96	36157	NA	NA
Volume	Lungs	23129	Trunk fat-free mass	Physical Measures	Impedance	LINEAR	0.0554	0.0501	0.0607	3.19e-94	38156	NA	NA
Volume	Lungs	23130	Trunk predicted mass	Physical Measures	Impedance	LINEAR	0.055	0.0498	0.0603	8.77e-93	38153	NA	NA
Volume	Lungs	23116	Leg fat mass (left)	Physical Measures	Impedance	LINEAR	-0.0589	-0.0646	-0.0533	6.93e-92	38194	NA	NA
Volume	Lungs	23110	L arm	Physical Measures	Impedance	LINEAR	-0.0785	-0.0866	-0.0704	7.48e-81	38198	NA	NA
Volume	Lungs	23109	R arm	Physical Measures	Impedance	LINEAR	-0.0781	-0.0861	-0.07	3.48e-80	38196	NA	NA
Volume	Lungs	23102	Whole body water mass	Physical Measures	Impedance	LINEAR	0.0464	0.0416	0.0512	1.25e-78	38202	NA	NA
Volume	Lungs	23101	Whole body FF mass	Physical Measures	Impedance	LINEAR	0.0455	0.0407	0.0502	8.32e-77	38202	NA	NA
Volume	Lungs	30830	SHBG	Biological samples	Cancer	LINEAR	0.107	0.0954	0.119	1.25e-68	32708	NA	NA
Volume	Lungs	23120	Arm fat mass (right)	Physical Measures	Impedance	LINEAR	-0.0616	-0.0687	-0.0544	1.97e-63	38186	NA	NA
Volume	Lungs	23124	Arm fat mass (left)	Physical Measures	Impedance	LINEAR	-0.0605	-0.0677	-0.0533	2.68e-61	38181	NA	NA
Volume	Lungs	22506-114	Tobacco smoking	Online follow-up	Medical information	MULTINOMIAL-LOGISTIC	NA	NA	NA	6.07e-60	NA	NA	NA
Volume	Lungs	30620	ALT	Biological samples	Liver	LINEAR	-0.104	-0.116	-0.0911	8.92e-60	36177	NA	NA
Volume	Lungs	23105	Basal metabolic rate	Physical Measures	Impedance	LINEAR	0.036	0.0316	0.0405	8.08e-57	38201	NA	NA
Volume	Lungs	30250	RC	Biological samples	Red blood cells	LINEAR	-0.0989	-0.112	-0.0861	2.62e-51	36184	NA	NA
Volume	Lungs	20162	% life smoking	Lifestyle and History	Lifestyle and environment	LINEAR	0.179	0.155	0.202	5.16e-50	9632	NA	NA
Volume	Lungs	20161	Pack years of smoking	Lifestyle and History	Lifestyle and environment	LINEAR	0.175	0.152	0.198	1.13e-48	9632	NA	NA
Volume	Lungs	30300	HLSRC	Biological samples	Red blood cells	LINEAR	-0.0936	-0.106	-0.0808	1.81e-46	36184	NA	NA
Volume	Lungs	23126	Arm predicted mass (left)	Physical Measures	Impedance	LINEAR	0.037	0.0319	0.0422	7.26e-45	38178	NA	NA
Volume	Lungs	23113	Leg fat-free mass (right)	Physical Measures	Impedance	LINEAR	0.0357	0.0307	0.0407	1.59e-44	38195	NA	NA
Volume	Lungs	23114	Leg predicted mass (right)	Physical Measures	Impedance	LINEAR	0.0353	0.0303	0.0403	9.58e-44	38195	NA	NA
Volume	Lungs	23125	Arm fat-free mass (left)	Physical Measures	Impedance	LINEAR	0.0364	0.0312	0.0415	2.23e-43	38180	NA	NA
Volume	Lungs	48	Waist circumference	Physical Measures	Body size measures	LINEAR	-0.0499	-0.057	-0.0427	6.78e-43	38648	NA	NA
Volume	Lungs	50	Standing height	Physical Measures	Body size measures	LINEAR	0.0141	0.0121	0.0161	8.35e-43	38644	NA	NA
Volume	Lungs	6152#8	Asthma	Medical history	Health and medical history	LOGISTIC-BINARY	0.283	0.242	0.324	2.34e-42	38652	4239	34413
Volume	Lungs	2316	Wheeze in last year	Medical history	Health and medical history	LOGISTIC-BINARY	0.243	0.207	0.278	9.58e-42	38152	6313	31839
Volume	Lungs	30010	Red blood cell (erythrocyte) count	Biological samples	Red blood cells	LINEAR	-0.0755	-0.0867	-0.0642	2.14e-39	36819	NA	NA
Volume	Lungs	30880	Urate	Biological samples	Renal	LINEAR	-0.0709	-0.0816	-0.0603	1.03e-38	36139	NA	NA
Volume	Lungs	23121	R arm FF mass	Physical Measures	Impedance	LINEAR	0.0345	0.0293	0.0397	3.26e-38	38184	NA	NA
Volume	Lungs	30240	Reticulocyte percentage	Biological samples	Red blood cells	LINEAR	-0.0854	-0.0985	-0.0722	4.76e-37	36185	NA	NA
Volume	Lungs	51	Seated height	Physical Measures	Body size measures	LINEAR	0.0503	0.0424	0.0581	6.34e-36	38130	NA	NA
Volume	Lungs	23122	R arm pred. mass	Physical Measures	Impedance	LINEAR	0.0332	0.0279	0.0384	1.57e-35	38184	NA	NA
Volume	Lungs	30290	High light scatter reticulocyte percentage	Biological samples	Red blood cells	LINEAR	-0.0823	-0.0953	-0.0693	2.93e-35	36185	NA	NA
Volume	Lungs	30730	GGT	Biological samples	Liver	LINEAR	-0.0771	-0.0895	-0.0648	1.46e-34	36164	NA	NA
Volume	Lungs	30710	C-reactive protein	Biological samples	Cardiovascular	LINEAR	-0.0789	-0.0916	-0.0662	4.77e-34	36109	NA	NA
Volume	Lungs	22130	COPD	Online follow-up	Medical information	LOGISTIC-BINARY	0.753	0.627	0.877	1.76e-32	21525	227	21298
Volume	Lungs	30760	HDL cholesterol	Biological samples	Cardiovascular	LINEAR	0.0731	0.0608	0.0854	2.22e-31	33022	NA	NA
Volume	Lungs	1438	Bread intake	Lifestyle and History	Lifestyle and environment	LINEAR	0.0768	0.0639	0.0898	4.01e-31	37534	NA	NA
Volume	Lungs	30640	Apolipoprotein B	Biological samples	Cardiovascular	LINEAR	-0.0813	-0.0952	-0.0675	1e-30	36010	NA	NA
Volume	Lungs	1687	Comparative body size at age 10	Lifestyle and History	Early life factors	ORDERED-LOGISTIC	0.152	0.125	0.178	6.67e-30	38234	NA	NA
Volume	Lungs	23118	Leg predicted mass (left)	Physical Measures	Impedance	LINEAR	0.0277	0.0229	0.0325	1.5e-29	38190	NA	NA
Volume	Lungs	23117	Leg fat-free mass (left)	Physical Measures	Impedance	LINEAR	0.0277	0.0229	0.0325	1.52e-29	38190	NA	NA
Volume	Lungs	46	Hand grip strength (left)	Physical Measures	Hand grip strength	LINEAR	0.0492	0.0403	0.0581	1.69e-27	38570	NA	NA
Volume	Lungs	20160	Ever smoked	Lifestyle and History	Lifestyle and environment	LOGISTIC-BINARY	0.155	0.127	0.183	5.01e-27	38594	21998	16596
Volume	Lungs	4079	"Diastolic blood pressure, automated reading"	Physical Measures	Blood pressure	LINEAR	-0.0713	-0.0844	-0.0582	1.15e-26	36318	NA	NA
Volume	Lungs	30020	Heamoglobin conc.	Biological samples	Red blood cells	LINEAR	-0.0563	-0.0668	-0.0459	5.04e-26	36820	NA	NA
Volume	Lungs	30030	Haematocrit percentage	Biological samples	Red blood cells	LINEAR	-0.0559	-0.0667	-0.0451	3e-24	36819	NA	NA
Volume	Lungs	21001	Body mass index (BMI)	Physical Measures	Body size measures	LINEAR	-0.0321	-0.0385	-0.0258	2.37e-23	38627	NA	NA
Volume	Lungs	30780	LDL direct	Biological samples	Cardiovascular	LINEAR	-0.0699	-0.0838	-0.056	5.59e-23	36105	NA	NA
Volume	Lungs	47	Hand grip strength (right)	Physical Measures	Hand grip strength	LINEAR	0.0445	0.0356	0.0534	9.89e-23	38562	NA	NA
Volume	Lungs	20256	FEV1 Z-score	Physical Measures	Spirometry	LINEAR	-0.0738	-0.0886	-0.0591	1.15e-22	31781	NA	NA
Volume	Lungs	22127	Asthma	Online follow-up	Medical information	LOGISTIC-BINARY	0.264	0.211	0.317	1.74e-22	21525	2695	18830
Volume	Lungs	30850	Testosterone	Biological samples	Cancer	LINEAR	0.0425	0.0339	0.0512	4.42e-22	33198	NA	NA
Volume	Lungs	3063	Forced expiratory volume in 1-second (FEV1)	Physical Measures	Spirometry	LINEAR	0.0456	0.0363	0.055	1.33e-21	35719	NA	NA
Volume	Lungs	20003#1140861998	Ventolin	Medical history	Medications	LOGISTIC-BINARY	0.371	0.291	0.448	1.95e-20	38674	894	37780
Volume	Lungs	1249	Past tobacco smoking	Lifestyle and History	Lifestyle and environment	ORDERED-LOGISTIC	-0.124	-0.15	-0.0975	2.37e-20	37033	NA	NA
Volume	Lungs	3456	Number of cigarettes currently smoked daily (current cigarette smokers)	Lifestyle and History	Lifestyle and environment	LINEAR	0.249	0.196	0.301	5.76e-20	1399	NA	NA
Volume	Lungs	22507	Age of stopping smoking	Online follow-up	Medical information	LINEAR	0.135	0.106	0.165	5.23e-19	7369	NA	NA
Volume	Lungs	30270	MSCV	Biological samples	Red blood cells	LINEAR	0.0618	0.0481	0.0755	9.1e-19	36185	NA	NA
Volume	Lungs	20022	Birth weight	Lifestyle and History	Early life factors	LINEAR	0.0761	0.059	0.0933	3.54e-18	23122	NA	NA
Volume	Lungs	2897	Age stopped smoking	Lifestyle and History	Lifestyle and environment	LINEAR	0.117	0.0906	0.144	6.78e-18	8671	NA	NA
Volume	Lungs	3786	Age asthma diagnosed	Medical history	Health and medical history	LINEAR	-0.164	-0.202	-0.126	3.41e-17	3801	NA	NA
Volume	Lungs	30690	Cholesterol	Biological samples	Cardiovascular	LINEAR	-0.0581	-0.0718	-0.0444	1.13e-16	36183	NA	NA
Volume	Lungs	6152#6	"Blood clot, DVT, bronchitis, emphysema, asthma, rhinitis, eczema, allergy diagnosed by doctor": Emphysema/chronic bronchitis	Medical history	Health and medical history	LOGISTIC-BINARY	0.496	0.371	0.615	1.61e-15	38652	273	38379
Volume	Lungs	3064	Peak expiratory flow (PEF)	Physical Measures	Spirometry	LINEAR	-0.0444	-0.0553	-0.0334	1.89e-15	35719	NA	NA
Volume	Lungs	22670	Minimum carotid IMT (intima-medial thickness) at 120 degrees	Physical Measures	Carotid ultrasound	LINEAR	0.0657	0.0492	0.0822	5.69e-15	22733	NA	NA
Volume	Lungs	3466	Time from waking to first cigarette	Lifestyle and History	Lifestyle and environment	ORDERED-LOGISTIC	-0.421	-0.526	-0.316	8.09e-15	1387	NA	NA
Volume	Lungs	22673	Minimum carotid IMT (intima-medial thickness) at 150 degrees	Physical Measures	Carotid ultrasound	LINEAR	0.0646	0.0483	0.081	1.1e-14	22816	NA	NA
Volume	Lungs	22147	Age asthma diagnosed by doctor	Online follow-up	Medical information	LINEAR	-0.181	-0.227	-0.134	3.62e-14	2695	NA	NA
Volume	Lungs	22674	Mean carotid IMT (intima-medial thickness) at 150 degrees	Physical Measures	Carotid ultrasound	LINEAR	0.058	0.0419	0.074	1.42e-12	22816	NA	NA
Volume	Lungs	30040	MCV	Biological samples	Red blood cells	LINEAR	0.0485	0.035	0.062	2.13e-12	36819	NA	NA
Volume	Lungs	3476	Difficulty not smoking for 1 day	Lifestyle and History	Lifestyle and environment	ORDERED-LOGISTIC	0.379	0.273	0.485	3.27e-12	1387	NA	NA
Volume	Lungs	904	Number of days/week of vigorous physical activity 10+ minutes	Lifestyle and History	Lifestyle and environment	ORDERED-LOGISTIC	0.0846	0.0603	0.109	8.94e-12	37971	NA	NA
Volume	Lungs	30630	Apolipoprotein A	Biological samples	Cardiovascular	LINEAR	0.0438	0.0309	0.0566	2.43e-11	32850	NA	NA
Volume	Lungs	6149#4	Mouth/teeth dental problems: Loose teeth	Medical history	Health and medical history	LOGISTIC-BINARY	0.238	0.167	0.308	3.23e-11	38111	1220	36891
Volume	Lungs	30860	Total protein	Biological samples	Renal	LINEAR	-0.0481	-0.0625	-0.0337	6.27e-11	32990	NA	NA
Volume	Lungs	22671	Mean carotid IMT (intima-medial thickness) at 120 degrees	Physical Measures	Carotid ultrasound	LINEAR	0.0533	0.0373	0.0694	8.02e-11	22733	NA	NA
Volume	Lungs	1697	Comparative height size at age 10	Lifestyle and History	Early life factors	ORDERED-LOGISTIC	0.0947	0.0658	0.124	1.36e-10	38263	NA	NA
Volume	Lungs	102	"Pulse rate, automated reading"	Physical Measures	Blood pressure	LINEAR	-0.0442	-0.0579	-0.0306	1.88e-10	36318	NA	NA
Volume	Lungs	884	Number of days/week of moderate physical activity 10+ minutes	Lifestyle and History	Lifestyle and environment	ORDERED-LOGISTIC	0.0774	0.0534	0.101	2.62e-10	37745	NA	NA
Volume	Lungs	20401	Ever addicted to any substance or behaviour	Online follow-up	Addictions	LOGISTIC-BINARY	0.211	0.145	0.276	3.03e-10	26521	1487	25034
Volume	Lungs	30280	Immature reticulocyte fraction	Biological samples	Red blood cells	LINEAR	-0.0429	-0.0563	-0.0295	3.66e-10	36185	NA	NA
Volume	Lungs	20150	"Forced expiratory volume in 1-second (FEV1), Best measure"	Physical Measures	Spirometry	LINEAR	0.0322	0.0221	0.0423	3.8e-10	29663	NA	NA
Volume	Lungs	22033	Summed days activity	Lifestyle and History	Lifestyle and environment	LINEAR	0.0453	0.0311	0.0596	4.22e-10	33698	NA	NA
Volume	Lungs	22676	Minimum carotid IMT (intima-medial thickness) at 210 degrees	Physical Measures	Carotid ultrasound	LINEAR	0.0523	0.0357	0.0689	6.6e-10	22743	NA	NA
Volume	Lungs	2267	Use of sun/uv protection	Lifestyle and History	Lifestyle and environment	ORDERED-LOGISTIC	-0.0798	-0.105	-0.0544	7.59e-10	38025	NA	NA
Volume	Lungs	30050	MCH	Biological samples	Red blood cells	LINEAR	0.042	0.0285	0.0555	1.09e-09	36818	NA	NA
Volume	Lungs	1070	Time spent watching TV	Lifestyle and History	Lifestyle and environment	ORDERED-LOGISTIC	-0.0776	-0.103	-0.0525	1.43e-09	35925	NA	NA
Volume	Lungs	20453	Ever taken cannabis	Online follow-up	Cannabis use	ORDERED-LOGISTIC	0.118	0.0796	0.157	1.97e-09	26759	NA	NA
Volume	Lungs	6150#100	Vascular/heart problems	Medical history	Health and medical history	LOGISTIC-BINARY	0.106	0.0712	0.141	2.27e-09	38635	30316	8319
Volume	Lungs	25005	Volume of grey matter (normalised for head size)	Physical Measures	Brain MRI	LINEAR	-0.0427	-0.0567	-0.0286	2.47e-09	19592	NA	NA
Volume	Lungs	30680	Calcium	Biological samples	Bone and joint	LINEAR	-0.0437	-0.0582	-0.0292	3.61e-09	33034	NA	NA
Volume	Lungs	6150#4	High blood pressure	Medical history	Health and medical history	LOGISTIC-BINARY	-0.107	-0.143	-0.0717	3.71e-09	38635	7691	30944
Volume	Lungs	1588	Average weekly beer plus cider intake	Lifestyle and History	Lifestyle and environment	ORDERED-LOGISTIC	0.0931	0.0622	0.124	3.76e-09	29425	NA	NA
Volume	Lungs	12681	Augmentation index for PWA	Physical Measures	Heart MRI	LINEAR	-0.0404	-0.0541	-0.0268	6.46e-09	33874	NA	NA
Volume	Lungs	22032	IPAQ activity group	Lifestyle and History	Lifestyle and environment	ORDERED-LOGISTIC	0.0809	0.0534	0.108	7.78e-09	32885	NA	NA
Volume	Lungs	6152#100	"Blood clot, DVT, bronchitis, emphysema, asthma, rhinitis, eczema, allergy diagnosed by doctor"	Medical history	Health and medical history	LOGISTIC-BINARY	-0.0849	-0.114	-0.056	7.85e-09	38652	26065	12587
Volume	Lungs	22040	Summed MET minutes per week for all activity	Lifestyle and History	Lifestyle and environment	LINEAR	0.0421	0.0277	0.0565	1.04e-08	32885	NA	NA
Volume	Lungs	1727	Ease of skin tanning	Lifestyle and History	Lifestyle and environment	ORDERED-LOGISTIC	-0.0723	-0.0974	-0.0473	1.53e-08	37452	NA	NA
Volume	Lungs	3637	Frequency of other exercises in last 4 weeks	Lifestyle and History	Lifestyle and environment	ORDERED-LOGISTIC	0.0971	0.0633	0.131	1.76e-08	21274	NA	NA
Volume	Lungs	30150	Eosinophill count	Biological samples	White blood cells	ORDERED-LOGISTIC	0.0745	0.0486	0.101	1.89e-08	36762	NA	NA
Volume	Lungs	30600	Albumin	Biological samples	Liver	LINEAR	-0.0405	-0.0547	-0.0263	2.24e-08	33034	NA	NA
Volume	Lungs	1060	Time spent outdoors in winter	Lifestyle and History	Lifestyle and environment	ORDERED-LOGISTIC	0.0813	0.0528	0.11	2.35e-08	29128	NA	NA
Volume	Lungs	30610	ALP	Biological samples	Bone and joint	LINEAR	-0.0384	-0.052	-0.0249	2.58e-08	36184	NA	NA
Volume	Lungs	25001	Volume of peripheral cortical grey matter (normalised for head size)	Physical Measures	Brain MRI	LINEAR	-0.0412	-0.0557	-0.0266	2.85e-08	19592	NA	NA
Volume	Lungs	1757	Facial ageing	Lifestyle and History	Lifestyle and environment	ORDERED-LOGISTIC	0.0895	0.0579	0.121	2.99e-08	35323	NA	NA
Volume	Lungs	20003#1141176832	Treatment/medication code: seretide 50 evohaler	Medical history	Medications	LOGISTIC-BINARY	0.364	0.232	0.491	3.46e-08	38674	316	38358
Volume	Lungs	30650	Aspartate aminotransferase	Biological samples	Liver	LINEAR	-0.0367	-0.0499	-0.0235	5.15e-08	36039	NA	NA
Volume	Lungs	2714	Age when periods started (menarche)	Lifestyle and History	Sex-specific factors	ORDERED-LOGISTIC	-0.117	-0.16	-0.0751	5.57e-08	19548	NA	NA
Volume	Lungs	22128	Doctor diagnosed emphysema	Online follow-up	Medical information	LOGISTIC-BINARY	0.733	0.452	0.987	6.56e-08	21525	39	21486
Volume	Lungs	30210	Eosinophill percentage	Biological samples	White blood cells	LINEAR	0.0376	0.0239	0.0513	7.09e-08	36763	NA	NA
Volume	Lungs	6154#100	"Medication for pain relief, constipation, heartburn"	Medical history	Health and medical history	LOGISTIC-BINARY	0.0792	0.0504	0.108	7.44e-08	37911	23531	14380
Volume	Lungs	12679	Number of beats in waveform average for PWA	Physical Measures	Heart MRI	LINEAR	-0.0387	-0.0529	-0.0246	7.6e-08	33879	NA	NA
Volume	Lungs	25879	Volume of grey matter in Thalamus (right)	Physical Measures	Brain MRI	LINEAR	0.0481	0.0305	0.0657	8.06e-08	19587	NA	NA
Volume	Lungs	25046	Median z-statistic (in group-defined mask) for faces activation	Physical Measures	Brain MRI	LINEAR	-0.054	-0.074	-0.034	1.24e-07	17232	NA	NA
Volume	Lungs	1618	Alcohol usually taken with meals	Lifestyle and History	Lifestyle and environment	LOGISTIC-BINARY	-0.114	-0.156	-0.0713	1.49e-07	20137	14555	5582
Volume	Lungs	20153	"Forced expiratory volume in 1-second (FEV1), predicted"	Physical Measures	Spirometry	LINEAR	0.0108	0.00672	0.0148	1.91e-07	12626	NA	NA
Volume	Lungs	22039	Vigorous activity	Lifestyle and History	Lifestyle and environment	ORDERED-LOGISTIC	0.0716	0.0446	0.0985	1.99e-07	32885	NA	NA
Volume	Lungs	20003#1141182632	Treatment/medication code: spiriva 18micrograms inhalation capsule	Medical history	Medications	LOGISTIC-BINARY	1.06	0.628	1.44	2.18e-07	38674	11	38663
Volume	Lungs	25042	Median z-statistic (in group-defined mask) for shapes activation	Physical Measures	Brain MRI	LINEAR	-0.0528	-0.0728	-0.0327	2.46e-07	17232	NA	NA
Volume	Lungs	22616#1	Breathing problems during period of job: Yes	Online follow-up	Employment history	LOGISTIC-BINARY	0.182	0.112	0.252	3.31e-07	21105	1446	19659
Volume	Lungs	4194	Pulse rate	Physical Measures	Arterial stiffness	LINEAR	-0.0603	-0.0835	-0.0372	3.34e-07	12807	NA	NA
Volume	Lungs	20003#1140926606	Treatment/medication code: salbutamol 100micrograms spacehaler	Medical history	Medications	LOGISTIC-BINARY	0.437	0.262	0.601	4.15e-07	38674	177	38497
Volume	Lungs	1418-2	Milk type used	Lifestyle and History	Lifestyle and environment	MULTINOMIAL-LOGISTIC	NA	NA	NA	4.43e-07	NA	NA	NA
Volume	Lungs	22618#0	Breathing problems improved/stopped away from workplace or on holiday: No	Online follow-up	Employment history	LOGISTIC-BINARY	0.216	0.131	0.299	4.53e-07	21105	971	20134
Volume	Lungs	738	Average total household income before tax	Lifestyle and History	Sociodemographics	ORDERED-LOGISTIC	-0.0656	-0.0911	-0.0401	4.75e-07	34927	NA	NA
Volume	Lungs	12336	Ventricular rate	Physical Measures	ECG at rest	LINEAR	-0.0353	-0.0491	-0.0215	5.45e-07	33695	NA	NA
Volume	Lungs	6143#1	Transport type for commuting to job workplace: Car/motor vehicle	Lifestyle and History	Sociodemographics	LOGISTIC-BINARY	-0.115	-0.16	-0.0696	6.32e-07	24407	20320	4087
Volume	Lungs	6164#3	Recent strenuous sports	Lifestyle and History	Lifestyle and environment	LOGISTIC-BINARY	0.0934	0.0565	0.13	6.73e-07	38127	5653	32474
Volume	Lungs	25764	90th percentile of z-statistic (in group-defined mask) for faces activation	Physical Measures	Brain MRI	LINEAR	-0.0505	-0.0704	-0.0305	7.07e-07	17232	NA	NA
Volume	Lungs	100017	Magnesium	Online follow-up	Estimated nutrients yesterday	LINEAR	0.0872	0.0527	0.122	7.18e-07	5729	NA	NA
Volume	Lungs	6162#1	Types of transport used (excluding work): Car/motor vehicle	Lifestyle and History	Lifestyle and environment	LOGISTIC-BINARY	-0.0933	-0.13	-0.0563	7.41e-07	38128	32040	6088
Volume	Lungs	22677	Mean carotid IMT (intima-medial thickness) at 210 degrees	Physical Measures	Carotid ultrasound	LINEAR	0.041	0.0248	0.0572	7.45e-07	22743	NA	NA
Volume	Lungs	22504	Bring up phlegm/sputum/mucus on most days	Online follow-up	Medical information	LOGISTIC-BINARY	0.156	0.0933	0.219	9.97e-07	21525	1738	19787
Volume	Lungs	22035	Above moderate/vigorous recommendation	Lifestyle and History	Lifestyle and environment	LOGISTIC-BINARY	0.073	0.0435	0.103	1.28e-06	32885	17759	15126
Volume	Lungs	1498	Coffee intake	Lifestyle and History	Lifestyle and environment	ORDERED-LOGISTIC	0.0652	0.0387	0.0916	1.35e-06	35578	NA	NA
Volume	Lungs	12698	Diastolic brachial blood pressure	Physical Measures	Heart MRI	LINEAR	-0.0341	-0.048	-0.0202	1.52e-06	34022	NA	NA
Volume	Lungs	2734	Number of live births	Lifestyle and History	Sex-specific factors	ORDERED-LOGISTIC	0.106	0.0624	0.149	1.7e-06	20021	NA	NA
Volume	Lungs	22679	Minimum carotid IMT (intima-medial thickness) at 240 degrees	Physical Measures	Carotid ultrasound	LINEAR	0.0405	0.0238	0.0572	1.93e-06	22572	NA	NA
Volume	Lungs	22619#0	Breathing problems responsible for leaving job: No	Online follow-up	Employment history	LOGISTIC-BINARY	0.186	0.109	0.262	1.98e-06	21105	1156	19949
Volume	Lungs	6162#4	Types of transport used (excluding work): Cycle	Lifestyle and History	Lifestyle and environment	LOGISTIC-BINARY	0.107	0.0616	0.153	3.89e-06	38128	3246	34882
Volume	Lungs	2443	Diabetes	Medical history	Health and medical history	LOGISTIC-BINARY	-0.205	-0.294	-0.119	4.05e-06	38619	1024	37595
Volume	Lungs	20117-2	Alcohol drinker status	Lifestyle and History	Lifestyle and environment	MULTINOMIAL-LOGISTIC	NA	NA	NA	4.29e-06	NA	NA	NA
Volume	Lungs	25878	Volume of grey matter in Thalamus (left)	Physical Measures	Brain MRI	LINEAR	0.0418	0.0239	0.0597	4.74e-06	19587	NA	NA
Volume	Lungs	25892	Volume of grey matter in Brain-Stem	Physical Measures	Brain MRI	LINEAR	0.0398	0.0228	0.0569	4.81e-06	19587	NA	NA
Volume	Lungs	1538-0	Major dietary changes in the last 5 years	Lifestyle and History	Lifestyle and environment	MULTINOMIAL-LOGISTIC	NA	NA	NA	4.9e-06	NA	NA	NA
Volume	Lungs	20004#1455	Operation code: cholecystectomy/gall bladder removal	Medical history	Operations	LOGISTIC-BINARY	-0.231	-0.332	-0.132	5.86e-06	38674	983	37691
Volume	Lungs	20480	Ever self-harmed	Online follow-up	Self-harm behaviours	LOGISTIC-BINARY	0.192	0.107	0.275	6.98e-06	26728	1102	25626
Volume	Lungs	22675	Maximum carotid IMT (intima-medial thickness) at 150 degrees	Physical Measures	Carotid ultrasound	LINEAR	0.0369	0.0207	0.0531	8.08e-06	22816	NA	NA
Volume	Lungs	25920	Volume of grey matter in X Cerebellum (right)	Physical Measures	Brain MRI	LINEAR	0.0398	0.0223	0.0574	8.48e-06	19587	NA	NA
Volume	Lungs	816	Job involves heavy manual or physical work	Lifestyle and History	Sociodemographics	ORDERED-LOGISTIC	0.0822	0.046	0.118	8.62e-06	26612	NA	NA
Volume	Lungs	25762	90th percentile of z-statistic (in group-defined mask) for shapes activation	Physical Measures	Brain MRI	LINEAR	-0.0454	-0.0654	-0.0254	8.75e-06	17232	NA	NA
Volume	Lungs	20554#1	Actions taken following self-harm: See anyone from psychiatric or mental health services, including liaison services	Online follow-up	Self-harm behaviours	LOGISTIC-BINARY	0.301	0.166	0.431	8.84e-06	26714	358	26356
Volume	Lungs	20003#1140884600	Metformin	Medical history	Medications	LOGISTIC-BINARY	-0.279	-0.404	-0.157	9.55e-06	38674	525	38149
Volume	Lungs	20003#1140866738	Treatment/medication code: atenolol	Medical history	Medications	LOGISTIC-BINARY	-0.211	-0.306	-0.118	1.07e-05	38674	885	37789
Volume	Lungs	20003#1140861958	Treatment/medication code: simvastatin	Medical history	Medications	LOGISTIC-BINARY	-0.114	-0.166	-0.0635	1.12e-05	38674	2955	35719
Volume	Lungs	30260	Mean reticulocyte volume	Biological samples	Red blood cells	LINEAR	0.031	0.0171	0.0448	1.13e-05	36185	NA	NA
Volume	Lungs	12680	Central augmentation pressure during PWA	Physical Measures	Heart MRI	LINEAR	-0.0297	-0.043	-0.0164	1.18e-05	33655	NA	NA
Volume	Lungs	25885	Volume of grey matter in Pallidum (right)	Physical Measures	Brain MRI	LINEAR	-0.0411	-0.0596	-0.0227	1.24e-05	19587	NA	NA
Volume	Lungs	22680	Mean carotid IMT (intima-medial thickness) at 240 degrees	Physical Measures	Carotid ultrasound	LINEAR	0.0363	0.02	0.0525	1.25e-05	22572	NA	NA
Volume	Lungs	680-1	Own or rent accommodation lived in	Lifestyle and History	Sociodemographics	MULTINOMIAL-LOGISTIC	NA	NA	NA	1.25e-05	NA	NA	NA
Volume	Lungs	20554#3	Actions taken following self-harm: Need hospital treatment (eg A&E)	Online follow-up	Self-harm behaviours	LOGISTIC-BINARY	0.272	0.146	0.394	1.73e-05	26714	435	26279
Volume	Lungs	100011	Iron	Online follow-up	Estimated nutrients yesterday	LINEAR	0.0757	0.0412	0.11	1.74e-05	5729	NA	NA
Volume	ASAT	23099	Body fat %	Physical Measures	Impedance	LINEAR	0.398	0.385	0.41	1e-300	38184	NA	NA
Volume	ASAT	23100	Whole body fat mass	Physical Measures	Impedance	LINEAR	0.281	0.268	0.295	1e-300	38155	NA	NA
Volume	ASAT	23101	Whole body FF mass	Physical Measures	Impedance	LINEAR	-0.313	-0.321	-0.304	1e-300	38202	NA	NA
Volume	ASAT	23102	Whole body water mass	Physical Measures	Impedance	LINEAR	-0.315	-0.324	-0.307	1e-300	38202	NA	NA
Volume	ASAT	23105	Basal metabolic rate	Physical Measures	Impedance	LINEAR	-0.253	-0.261	-0.245	1e-300	38201	NA	NA
Volume	ASAT	23106	Whole body	Physical Measures	Impedance	LINEAR	0.669	0.655	0.684	1e-300	38200	NA	NA
Volume	ASAT	23107	R leg	Physical Measures	Impedance	LINEAR	0.659	0.641	0.678	1e-300	38201	NA	NA
Volume	ASAT	23108	L leg	Physical Measures	Impedance	LINEAR	0.654	0.635	0.672	1e-300	38199	NA	NA
Volume	ASAT	23109	R arm	Physical Measures	Impedance	LINEAR	0.601	0.587	0.615	1e-300	38196	NA	NA
Volume	ASAT	23110	L arm	Physical Measures	Impedance	LINEAR	0.6	0.586	0.615	1e-300	38198	NA	NA
Volume	ASAT	23111	Leg fat percentage (right)	Physical Measures	Impedance	LINEAR	0.229	0.219	0.24	1e-300	38199	NA	NA
Volume	ASAT	23113	Leg fat-free mass (right)	Physical Measures	Impedance	LINEAR	-0.265	-0.275	-0.256	1e-300	38195	NA	NA
Volume	ASAT	23114	Leg predicted mass (right)	Physical Measures	Impedance	LINEAR	-0.264	-0.273	-0.255	1e-300	38195	NA	NA
Volume	ASAT	23115	Leg fat percentage (left)	Physical Measures	Impedance	LINEAR	0.206	0.196	0.217	1e-300	38194	NA	NA
Volume	ASAT	23117	Leg fat-free mass (left)	Physical Measures	Impedance	LINEAR	-0.238	-0.246	-0.229	1e-300	38190	NA	NA
Volume	ASAT	23118	Leg predicted mass (left)	Physical Measures	Impedance	LINEAR	-0.236	-0.245	-0.227	1e-300	38190	NA	NA
Volume	ASAT	23119	Arm fat percentage (right)	Physical Measures	Impedance	LINEAR	0.306	0.294	0.318	1e-300	38188	NA	NA
Volume	ASAT	23121	R arm FF mass	Physical Measures	Impedance	LINEAR	-0.314	-0.323	-0.304	1e-300	38184	NA	NA
Volume	ASAT	23122	R arm pred. mass	Physical Measures	Impedance	LINEAR	-0.311	-0.321	-0.302	1e-300	38184	NA	NA
Volume	ASAT	23123	Arm fat percentage (left)	Physical Measures	Impedance	LINEAR	0.303	0.291	0.314	1e-300	38184	NA	NA
Volume	ASAT	23125	Arm fat-free mass (left)	Physical Measures	Impedance	LINEAR	-0.285	-0.294	-0.275	1e-300	38180	NA	NA
Volume	ASAT	23126	Arm predicted mass (left)	Physical Measures	Impedance	LINEAR	-0.284	-0.293	-0.274	1e-300	38178	NA	NA
Volume	ASAT	23127	Trunk fat percentage	Physical Measures	Impedance	LINEAR	0.539	0.524	0.555	1e-300	38167	NA	NA
Volume	ASAT	23128	Trunk fat mass	Physical Measures	Impedance	LINEAR	0.375	0.36	0.39	1e-300	38164	NA	NA
Volume	ASAT	23129	Trunk fat-free mass	Physical Measures	Impedance	LINEAR	-0.338	-0.348	-0.329	1e-300	38156	NA	NA
Volume	ASAT	23130	Trunk predicted mass	Physical Measures	Impedance	LINEAR	-0.336	-0.346	-0.327	1e-300	38153	NA	NA
Volume	ASAT	46	Hand grip strength (left)	Physical Measures	Hand grip strength	LINEAR	-0.294	-0.31	-0.277	1.07e-258	38570	NA	NA
Volume	ASAT	47	Hand grip strength (right)	Physical Measures	Hand grip strength	LINEAR	-0.283	-0.3	-0.266	4.58e-239	38562	NA	NA
Volume	ASAT	48	Waist circumference	Physical Measures	Body size measures	LINEAR	0.193	0.179	0.206	5.33e-173	38648	NA	NA
Volume	ASAT	23120	Arm fat mass (right)	Physical Measures	Impedance	LINEAR	0.186	0.173	0.2	1.38e-157	38186	NA	NA
Volume	ASAT	23124	Arm fat mass (left)	Physical Measures	Impedance	LINEAR	0.18	0.166	0.194	2.4e-147	38181	NA	NA
Volume	ASAT	904	Number of days/week of vigorous physical activity 10+ minutes	Lifestyle and History	Lifestyle and environment	ORDERED-LOGISTIC	-0.608	-0.655	-0.561	1.74e-139	37971	NA	NA
Volume	ASAT	6164#3	Recent strenuous sports	Lifestyle and History	Lifestyle and environment	LOGISTIC-BINARY	-1.03	-1.11	-0.945	4.38e-135	38127	5653	32474
Volume	ASAT	49	Hip circumference	Physical Measures	Body size measures	LINEAR	0.191	0.175	0.207	5.94e-127	38649	NA	NA
Volume	ASAT	20257	FVC Z-score	Physical Measures	Spirometry	LINEAR	0.336	0.308	0.364	1.59e-123	31781	NA	NA
Volume	ASAT	30710	C-reactive protein	Biological samples	Cardiovascular	LINEAR	0.286	0.262	0.31	6.91e-120	36109	NA	NA
Volume	ASAT	23112	Leg fat mass (right)	Physical Measures	Impedance	LINEAR	0.131	0.12	0.142	3.65e-119	38197	NA	NA
Volume	ASAT	3062	FVC	Physical Measures	Spirometry	LINEAR	-0.192	-0.209	-0.176	1.98e-113	35719	NA	NA
Volume	ASAT	22039	Vigorous activity	Lifestyle and History	Lifestyle and environment	ORDERED-LOGISTIC	-0.589	-0.642	-0.537	5.77e-106	32885	NA	NA
Volume	ASAT	30700	Creatinine	Biological samples	Renal	LINEAR	-0.222	-0.242	-0.201	2.92e-100	36163	NA	NA
Volume	ASAT	20151	"FVC, Best measure"	Physical Measures	Spirometry	LINEAR	-0.192	-0.209	-0.174	5.35e-100	29663	NA	NA
Volume	ASAT	22033	Summed days activity	Lifestyle and History	Lifestyle and environment	LINEAR	-0.287	-0.314	-0.26	1.27e-94	33698	NA	NA
Volume	ASAT	23116	Leg fat mass (left)	Physical Measures	Impedance	LINEAR	0.113	0.102	0.124	1.03e-92	38194	NA	NA
Volume	ASAT	3143	Ankle spacing width	Physical Measures	Bone-densitometry of heel	LINEAR	-0.241	-0.264	-0.218	1.22e-91	20747	NA	NA
Volume	ASAT	22032	IPAQ activity group	Lifestyle and History	Lifestyle and environment	ORDERED-LOGISTIC	-0.544	-0.597	-0.491	2.46e-89	32885	NA	NA
Volume	ASAT	22040	Summed MET minutes per week for all activity	Lifestyle and History	Lifestyle and environment	LINEAR	-0.277	-0.304	-0.249	6.48e-86	32885	NA	NA
Volume	ASAT	12336	Ventricular rate	Physical Measures	ECG at rest	LINEAR	0.261	0.235	0.288	2.15e-84	33695	NA	NA
Volume	ASAT	884	Number of days/week of moderate physical activity 10+ minutes	Lifestyle and History	Lifestyle and environment	ORDERED-LOGISTIC	-0.437	-0.483	-0.391	1.07e-77	37745	NA	NA
Volume	ASAT	22035	Above moderate/vigorous recommendation	Lifestyle and History	Lifestyle and environment	LOGISTIC-BINARY	-0.535	-0.593	-0.478	1.44e-73	32885	17759	15126
Volume	ASAT	20256	FEV1 Z-score	Physical Measures	Spirometry	LINEAR	0.247	0.219	0.275	4.09e-66	31781	NA	NA
Volume	ASAT	22034	Summed minutes activity	Lifestyle and History	Lifestyle and environment	LINEAR	-0.238	-0.266	-0.21	1.12e-63	32885	NA	NA
Volume	ASAT	12679	Number of beats in waveform average for PWA	Physical Measures	Heart MRI	LINEAR	0.227	0.2	0.253	3.99e-61	33879	NA	NA
Volume	ASAT	6160#1	Leisure/social activities: Sports club or gym	Lifestyle and History	Psychosocial factors	LOGISTIC-BINARY	-0.461	-0.516	-0.406	2.32e-60	38620	13933	24687
Volume	ASAT	22038	MET minutes per week for moderate activity	Lifestyle and History	Lifestyle and environment	LINEAR	-0.225	-0.252	-0.197	1.59e-57	32885	NA	NA
Volume	ASAT	3063	Forced expiratory volume in 1-second (FEV1)	Physical Measures	Spirometry	LINEAR	-0.143	-0.161	-0.126	1.36e-56	35719	NA	NA
Volume	ASAT	6164#2	Types of physical activity in last 4 weeks: Other exercises (eg: swimming, cycling, keep fit, bowling)	Lifestyle and History	Lifestyle and environment	LOGISTIC-BINARY	-0.428	-0.481	-0.374	2.82e-55	38127	21422	16705
Volume	ASAT	102	"Pulse rate, automated reading"	Physical Measures	Blood pressure	LINEAR	0.205	0.179	0.231	4.22e-54	36318	NA	NA
Volume	ASAT	30610	ALP	Biological samples	Bone and joint	LINEAR	0.199	0.173	0.224	6.06e-52	36184	NA	NA
Volume	ASAT	20022	Birth weight	Lifestyle and History	Early life factors	LINEAR	-0.241	-0.272	-0.21	7.95e-52	23122	NA	NA
Volume	ASAT	12340	QRS duration	Physical Measures	ECG at rest	LINEAR	-0.188	-0.213	-0.163	6.83e-49	33690	NA	NA
Volume	ASAT	6162#4	Types of transport used (excluding work): Cycle	Lifestyle and History	Lifestyle and environment	LOGISTIC-BINARY	-0.766	-0.868	-0.664	9.54e-49	38128	3246	34882
Volume	ASAT	20150	"Forced expiratory volume in 1-second (FEV1), Best measure"	Physical Measures	Spirometry	LINEAR	-0.141	-0.16	-0.122	2.96e-47	29663	NA	NA
Volume	ASAT	25008	Volume of white matter	Physical Measures	Brain MRI	LINEAR	-0.204	-0.232	-0.176	3.09e-45	19592	NA	NA
Volume	ASAT	924	Usual walking pace	Lifestyle and History	Lifestyle and environment	ORDERED-LOGISTIC	-0.375	-0.429	-0.322	3.21e-43	38610	NA	NA
Volume	ASAT	22671	Mean carotid IMT (intima-medial thickness) at 120 degrees	Physical Measures	Carotid ultrasound	LINEAR	-0.215	-0.246	-0.184	9.79e-42	22733	NA	NA
Volume	ASAT	25849	"Volume of grey matter in Parahippocampal Gyrus, anterior division (right)"	Physical Measures	Brain MRI	LINEAR	-0.22	-0.252	-0.188	1.49e-41	19587	NA	NA
Volume	ASAT	30090	Platelet crit	Biological samples	Platelets	LINEAR	0.169	0.144	0.194	1.64e-40	36820	NA	NA
Volume	ASAT	2040	Risk taking	Lifestyle and History	Psychosocial factors	LOGISTIC-BINARY	-0.395	-0.455	-0.336	3.82e-39	37525	10672	26853
Volume	ASAT	25848	"Volume of grey matter in Parahippocampal Gyrus, anterior division (left)"	Physical Measures	Brain MRI	LINEAR	-0.215	-0.247	-0.182	1.44e-38	19587	NA	NA
Volume	ASAT	25010	"Volume of brain, grey+white matter"	Physical Measures	Brain MRI	LINEAR	-0.185	-0.212	-0.157	2.2e-38	19592	NA	NA
Volume	ASAT	2149	Lifetime number of sexual partners	Lifestyle and History	Lifestyle and environment	ORDERED-LOGISTIC	-0.344	-0.397	-0.292	7.07e-38	33786	NA	NA
Volume	ASAT	22670	Minimum carotid IMT (intima-medial thickness) at 120 degrees	Physical Measures	Carotid ultrasound	LINEAR	-0.21	-0.242	-0.178	8.5e-38	22733	NA	NA
Volume	ASAT	22036	Above moderate/vigorous/walking recommendation	Lifestyle and History	Lifestyle and environment	LOGISTIC-BINARY	-0.45	-0.52	-0.38	1.4e-36	32885	26628	6257
Volume	ASAT	6033	Maximum heart rate during fitness test	Physical Measures	ECG during exercise	LINEAR	0.401	0.339	0.463	3.35e-36	6160	NA	NA
Volume	ASAT	2139	Age first had sexual intercourse	Lifestyle and History	Lifestyle and environment	LINEAR	0.164	0.138	0.19	3.99e-36	35828	NA	NA
Volume	ASAT	30770	IGF-1	Biological samples	Cancer	LINEAR	-0.161	-0.186	-0.135	2.4e-35	36002	NA	NA
Volume	ASAT	1070	Time spent watching TV	Lifestyle and History	Lifestyle and environment	ORDERED-LOGISTIC	0.301	0.253	0.349	6.88e-35	35925	NA	NA
Volume	ASAT	22674	Mean carotid IMT (intima-medial thickness) at 150 degrees	Physical Measures	Carotid ultrasound	LINEAR	-0.191	-0.222	-0.16	1.61e-33	22816	NA	NA
Volume	ASAT	6143#4	Transport type for commuting to job workplace: Cycle	Lifestyle and History	Sociodemographics	LOGISTIC-BINARY	-0.808	-0.94	-0.676	4.25e-33	24407	1999	22408
Volume	ASAT	22680	Mean carotid IMT (intima-medial thickness) at 240 degrees	Physical Measures	Carotid ultrasound	LINEAR	-0.193	-0.224	-0.161	5.76e-33	22572	NA	NA
Volume	ASAT	3637	Frequency of other exercises in last 4 weeks	Lifestyle and History	Lifestyle and environment	ORDERED-LOGISTIC	-0.388	-0.452	-0.324	9.09e-33	21274	NA	NA
Volume	ASAT	2178	Overall health rating	Medical history	Health and medical history	ORDERED-LOGISTIC	0.311	0.259	0.363	3.66e-32	38606	NA	NA
Volume	ASAT	20116-0	Smoking status	Lifestyle and History	Lifestyle and environment	MULTINOMIAL-LOGISTIC	NA	NA	NA	2.01e-31	NA	NA	NA
Volume	ASAT	5983	"ECG, heart rate"	Physical Measures	ECG during exercise	LINEAR	0.377	0.314	0.441	2.6e-31	6129	NA	NA
Volume	ASAT	30840	Total bilirubin	Biological samples	Liver	LINEAR	-0.149	-0.174	-0.123	3.95e-31	36016	NA	NA
Volume	ASAT	22672	Maximum carotid IMT (intima-medial thickness) at 120 degrees	Physical Measures	Carotid ultrasound	LINEAR	-0.185	-0.216	-0.154	5.82e-31	22733	NA	NA
Volume	ASAT	25854	"Volume of grey matter in Temporal Fusiform Cortex, anterior division (left)"	Physical Measures	Brain MRI	LINEAR	-0.191	-0.224	-0.159	3.99e-30	19587	NA	NA
Volume	ASAT	2405	Number of children fathered	Lifestyle and History	Sex-specific factors	ORDERED-LOGISTIC	-0.407	-0.477	-0.337	7.95e-30	18279	NA	NA
Volume	ASAT	3064	Peak expiratory flow (PEF)	Physical Measures	Spirometry	LINEAR	-0.12	-0.141	-0.0992	8.6e-30	35719	NA	NA
Volume	ASAT	1727	Ease of skin tanning	Lifestyle and History	Lifestyle and environment	ORDERED-LOGISTIC	0.276	0.228	0.323	1.02e-29	37452	NA	NA
Volume	ASAT	22679	Minimum carotid IMT (intima-medial thickness) at 240 degrees	Physical Measures	Carotid ultrasound	LINEAR	-0.185	-0.218	-0.153	3.87e-29	22572	NA	NA
Volume	ASAT	22673	Minimum carotid IMT (intima-medial thickness) at 150 degrees	Physical Measures	Carotid ultrasound	LINEAR	-0.181	-0.213	-0.149	6.06e-29	22816	NA	NA
Volume	ASAT	914	Duration of vigorous activity	Lifestyle and History	Lifestyle and environment	LINEAR	-0.188	-0.222	-0.155	7.52e-28	23575	NA	NA
Volume	ASAT	20258	FEV1/FVC Z-score	Physical Measures	Spirometry	LINEAR	-0.156	-0.185	-0.128	1.52e-27	31781	NA	NA
Volume	ASAT	1050	Time spend outdoors in summer	Lifestyle and History	Lifestyle and environment	ORDERED-LOGISTIC	-0.287	-0.339	-0.235	2.79e-27	34873	NA	NA
Volume	ASAT	22681	Maximum carotid IMT (intima-medial thickness) at 240 degrees	Physical Measures	Carotid ultrasound	LINEAR	-0.174	-0.206	-0.143	3.39e-27	22572	NA	NA
Volume	ASAT	25797	Volume of grey matter in Temporal Pole (right)	Physical Measures	Brain MRI	LINEAR	-0.177	-0.21	-0.145	5.59e-27	19587	NA	NA
Volume	ASAT	25011	Volume of thalamus (left)	Physical Measures	Brain MRI	LINEAR	-0.165	-0.196	-0.135	1.04e-26	19577	NA	NA
Volume	ASAT	25796	Volume of grey matter in Temporal Pole (left)	Physical Measures	Brain MRI	LINEAR	-0.173	-0.205	-0.142	1.48e-26	19587	NA	NA
Volume	ASAT	1060	Time spent outdoors in winter	Lifestyle and History	Lifestyle and environment	ORDERED-LOGISTIC	-0.303	-0.359	-0.248	1.54e-26	29128	NA	NA
Volume	ASAT	1558	Alcohol freq.	Lifestyle and History	Lifestyle and environment	ORDERED-LOGISTIC	0.249	0.203	0.295	1.83e-26	38661	NA	NA
Volume	ASAT	25878	Volume of grey matter in Thalamus (left)	Physical Measures	Brain MRI	LINEAR	-0.186	-0.22	-0.152	2.94e-26	19587	NA	NA
Volume	ASAT	22675	Maximum carotid IMT (intima-medial thickness) at 150 degrees	Physical Measures	Carotid ultrasound	LINEAR	-0.168	-0.199	-0.137	1.14e-25	22816	NA	NA
Volume	ASAT	30140	Neutrophill count	Biological samples	White blood cells	LINEAR	0.139	0.113	0.165	1.2e-25	36762	NA	NA
Volume	ASAT	30080	Platelet count	Biological samples	Platelets	LINEAR	0.136	0.11	0.161	1.25e-25	36820	NA	NA
Volume	ASAT	21060	Tired	Online follow-up	Digestive health	ORDERED-LOGISTIC	0.3	0.243	0.356	3.86e-25	30162	NA	NA
Volume	ASAT	6160#100	Leisure/social activities	Lifestyle and History	Psychosocial factors	LOGISTIC-BINARY	0.301	0.243	0.358	1.26e-24	38620	10661	27959
Volume	ASAT	30000	White blood cell (leukocyte) count	Biological samples	White blood cells	LINEAR	0.134	0.108	0.16	1.91e-24	36819	NA	NA
Volume	ASAT	25005	Volume of grey matter (normalised for head size)	Physical Measures	Brain MRI	LINEAR	0.139	0.113	0.166	3.25e-24	19592	NA	NA
Volume	ASAT	12338	P duration	Physical Measures	ECG at rest	LINEAR	-0.144	-0.171	-0.116	3.38e-24	31864	NA	NA
Volume	ASAT	25012	Volume of thalamus (right)	Physical Measures	Brain MRI	LINEAR	-0.154	-0.184	-0.124	4.79e-24	19577	NA	NA
Volume	ASAT	25846	Volume of grey matter in Frontal Orbital Cortex (left)	Physical Measures	Brain MRI	LINEAR	-0.162	-0.194	-0.131	6.08e-24	19587	NA	NA
Volume	ASAT	25887	Volume of grey matter in Hippocampus (right)	Physical Measures	Brain MRI	LINEAR	-0.167	-0.2	-0.134	1.55e-23	19587	NA	NA
Volume	ASAT	25855	"Volume of grey matter in Temporal Fusiform Cortex, anterior division (right)"	Physical Measures	Brain MRI	LINEAR	-0.165	-0.198	-0.132	3.34e-23	19587	NA	NA
Volume	ASAT	22677	Mean carotid IMT (intima-medial thickness) at 210 degrees	Physical Measures	Carotid ultrasound	LINEAR	-0.159	-0.19	-0.128	3.5e-23	22743	NA	NA
Volume	ASAT	30890	Vitamin D	Biological samples	Bone and joint	LINEAR	-0.132	-0.158	-0.106	6.81e-23	34747	NA	NA
Volume	ASAT	864	Number of days/week walked 10+ minutes	Lifestyle and History	Lifestyle and environment	ORDERED-LOGISTIC	-0.235	-0.282	-0.188	9.81e-23	38431	NA	NA
Volume	ASAT	1100	Drive faster than motorway speed limit	Lifestyle and History	Lifestyle and environment	ORDERED-LOGISTIC	-0.249	-0.299	-0.199	1.81e-22	36631	NA	NA
Volume	ASAT	25006	Volume of grey matter	Physical Measures	Brain MRI	LINEAR	-0.142	-0.171	-0.114	1.95e-22	19592	NA	NA
Volume	ASAT	25886	Volume of grey matter in Hippocampus (left)	Physical Measures	Brain MRI	LINEAR	-0.161	-0.194	-0.128	3.32e-22	19587	NA	NA
Volume	ASAT	51	Seated height	Physical Measures	Body size measures	LINEAR	-0.0726	-0.0875	-0.0576	2.24e-21	38130	NA	NA
Volume	ASAT	25002	Volume of peripheral cortical grey matter	Physical Measures	Brain MRI	LINEAR	-0.139	-0.168	-0.111	2.79e-21	19592	NA	NA
Volume	ASAT	25016	Volume of putamen (right)	Physical Measures	Brain MRI	LINEAR	-0.147	-0.178	-0.116	8.99e-21	19577	NA	NA
Volume	ASAT	20459	Happy with health	Online follow-up	Happiness and subjective well-being	ORDERED-LOGISTIC	0.278	0.219	0.336	1.27e-20	26748	NA	NA
Volume	ASAT	30050	MCH	Biological samples	Red blood cells	LINEAR	-0.123	-0.149	-0.097	1.4e-20	36818	NA	NA
Volume	ASAT	1588	Average weekly beer plus cider intake	Lifestyle and History	Lifestyle and environment	ORDERED-LOGISTIC	-0.296	-0.359	-0.234	1.44e-20	29425	NA	NA
Volume	ASAT	4194	Pulse rate	Physical Measures	Arterial stiffness	LINEAR	0.21	0.166	0.255	1.62e-20	12807	NA	NA
Volume	ASAT	6154#3	Paracetamol	Medical history	Health and medical history	LOGISTIC-BINARY	0.315	0.249	0.382	2.2e-20	37911	7014	30897
Volume	ASAT	22676	Minimum carotid IMT (intima-medial thickness) at 210 degrees	Physical Measures	Carotid ultrasound	LINEAR	-0.152	-0.184	-0.119	2.31e-20	22743	NA	NA
Volume	ASAT	20154	"Forced expiratory volume in 1-second (FEV1), predicted percentage"	Physical Measures	Spirometry	LINEAR	-0.209	-0.254	-0.165	2.76e-20	12626	NA	NA
Volume	ASAT	25879	Volume of grey matter in Thalamus (right)	Physical Measures	Brain MRI	LINEAR	-0.157	-0.191	-0.124	5.78e-20	19587	NA	NA
Volume	ASAT	1249	Past tobacco smoking	Lifestyle and History	Lifestyle and environment	ORDERED-LOGISTIC	0.228	0.179	0.277	5.87e-20	37033	NA	NA
Volume	ASAT	3647	Duration of other exercises	Lifestyle and History	Lifestyle and environment	ORDERED-LOGISTIC	-0.293	-0.358	-0.229	5.23e-19	21287	NA	NA
Volume	ASAT	25025	Volume of brain stem + 4th ventricle	Physical Measures	Brain MRI	LINEAR	-0.145	-0.177	-0.113	5.83e-19	19577	NA	NA
Volume	ASAT	20414	Freq alcohol	Online follow-up	Alcohol use	ORDERED-LOGISTIC	-0.253	-0.309	-0.197	7.53e-19	26770	NA	NA
Volume	ASAT	25014	Volume of caudate (right)	Physical Measures	Brain MRI	LINEAR	-0.153	-0.187	-0.119	1.14e-18	19577	NA	NA
Volume	ASAT	25018	Volume of pallidum (right)	Physical Measures	Brain MRI	LINEAR	-0.151	-0.184	-0.117	1.18e-18	19577	NA	NA
Volume	ASAT	50	Standing height	Physical Measures	Body size measures	LINEAR	-0.0171	-0.021	-0.0133	1.71e-18	38644	NA	NA
Volume	ASAT	25015	Volume of putamen (left)	Physical Measures	Brain MRI	LINEAR	-0.138	-0.169	-0.107	2.08e-18	19577	NA	NA
Volume	ASAT	1239	Current tobacco smoking	Lifestyle and History	Lifestyle and environment	ORDERED-LOGISTIC	-0.454	-0.556	-0.352	2.17e-18	38660	NA	NA
Volume	ASAT	12682	Cardiac output during PWA	Physical Measures	Heart MRI	LINEAR	0.113	0.0876	0.139	3.62e-18	33105	NA	NA
Volume	ASAT	25017	Volume of pallidum (left)	Physical Measures	Brain MRI	LINEAR	-0.149	-0.183	-0.116	3.65e-18	19577	NA	NA
Volume	ASAT	25802	"Volume of grey matter in Middle Temporal Gyrus, anterior division (left)"	Physical Measures	Brain MRI	LINEAR	-0.149	-0.183	-0.116	4.13e-18	19587	NA	NA
Volume	ASAT	21051	Degree bothered by headaches in the last 3 months	Online follow-up	Digestive health	ORDERED-LOGISTIC	0.271	0.209	0.332	5.52e-18	30160	NA	NA
Volume	ASAT	30660	Direct bilirubin	Biological samples	Liver	LINEAR	-0.12	-0.148	-0.093	6.63e-18	31320	NA	NA
Volume	ASAT	1329	Oily fish intake	Lifestyle and History	Lifestyle and environment	ORDERED-LOGISTIC	-0.207	-0.254	-0.16	7.69e-18	38600	NA	NA
Volume	ASAT	25001	Volume of peripheral cortical grey matter (normalised for head size)	Physical Measures	Brain MRI	LINEAR	0.122	0.0946	0.15	8.45e-18	19592	NA	NA
Volume	ASAT	25847	Volume of grey matter in Frontal Orbital Cortex (right)	Physical Measures	Brain MRI	LINEAR	-0.139	-0.171	-0.107	1.09e-17	19587	NA	NA
Volume	ASAT	25835	Volume of grey matter in Subcallosal Cortex (right)	Physical Measures	Brain MRI	LINEAR	-0.141	-0.173	-0.108	1.4e-17	19587	NA	NA
Volume	ASAT	6139#3	Gas or solid-fuel cooking/heating: An open solid fuel fire that you use regularly in winter time	Lifestyle and History	Sociodemographics	LOGISTIC-BINARY	-0.382	-0.47	-0.294	1.54e-17	38104	3968	34136
Volume	ASAT	25852	Volume of grey matter in Lingual Gyrus (left)	Physical Measures	Brain MRI	LINEAR	-0.135	-0.166	-0.104	2.23e-17	19587	NA	NA
Volume	ASAT	25784	Volume of grey matter in Insular Cortex (left)	Physical Measures	Brain MRI	LINEAR	-0.139	-0.171	-0.107	2.26e-17	19587	NA	NA
Volume	ASAT	25853	Volume of grey matter in Lingual Gyrus (right)	Physical Measures	Brain MRI	LINEAR	-0.135	-0.166	-0.104	2.92e-17	19587	NA	NA
Volume	ASAT	20160	Ever smoked	Lifestyle and History	Lifestyle and environment	LOGISTIC-BINARY	-0.226	-0.279	-0.173	4.73e-17	38594	21998	16596
Volume	ASAT	1468-3	Cereal type	Lifestyle and History	Lifestyle and environment	MULTINOMIAL-LOGISTIC	NA	NA	NA	5e-17	NA	NA	NA
Volume	ASAT	25013	Volume of caudate (left)	Physical Measures	Brain MRI	LINEAR	-0.144	-0.178	-0.11	6.22e-17	19577	NA	NA
Volume	ASAT	894	Duration of moderate activity	Lifestyle and History	Lifestyle and environment	ORDERED-LOGISTIC	-0.233	-0.288	-0.179	6.5e-17	30252	NA	NA
Volume	ASAT	25859	Volume of grey matter in Temporal Occipital Fusiform Cortex (right)	Physical Measures	Brain MRI	LINEAR	-0.141	-0.175	-0.108	8.49e-17	19587	NA	NA
Volume	ASAT	30010	Red blood cell (erythrocyte) count	Biological samples	Red blood cells	LINEAR	0.0916	0.07	0.113	9.58e-17	36819	NA	NA
Volume	ASAT	1319	Dried fruit intake	Lifestyle and History	Lifestyle and environment	ORDERED-LOGISTIC	-0.227	-0.281	-0.173	1.15e-16	34782	NA	NA
Volume	ASAT	1677	Breastfed as a baby	Lifestyle and History	Early life factors	LOGISTIC-BINARY	-0.276	-0.342	-0.211	1.2e-16	30904	22382	8522
Volume	ASAT	22678	Maximum carotid IMT (intima-medial thickness) at 210 degrees	Physical Measures	Carotid ultrasound	LINEAR	-0.133	-0.164	-0.101	1.37e-16	22743	NA	NA
Volume	ASAT	1518	Hot drink temperature	Lifestyle and History	Lifestyle and environment	ORDERED-LOGISTIC	0.227	0.173	0.281	2.33e-16	38310	NA	NA
Volume	ASAT	1970	Nervous feelings	Lifestyle and History	Psychosocial factors	LOGISTIC-BINARY	0.277	0.21	0.344	4.17e-16	37934	7603	30331
Volume	ASAT	20416	Freq 6+ units alcohol	Online follow-up	Alcohol use	ORDERED-LOGISTIC	-0.251	-0.311	-0.19	5.37e-16	24883	NA	NA
Volume	ASAT	1717	Skin colour	Lifestyle and History	Lifestyle and environment	ORDERED-LOGISTIC	-0.23	-0.287	-0.174	1.11e-15	38374	NA	NA
Volume	ASAT	12702	Cardiac index during PWA	Physical Measures	Heart MRI	LINEAR	0.097	0.0733	0.121	1.12e-15	31684	NA	NA
Volume	ASAT	25856	"Volume of grey matter in Temporal Fusiform Cortex, posterior division (left)"	Physical Measures	Brain MRI	LINEAR	-0.131	-0.163	-0.0983	2e-15	19587	NA	NA
Volume	ASAT	25920	Volume of grey matter in X Cerebellum (right)	Physical Measures	Brain MRI	LINEAR	-0.136	-0.17	-0.103	2.03e-15	19587	NA	NA
Volume	ASAT	20453	Ever taken cannabis	Online follow-up	Cannabis use	ORDERED-LOGISTIC	-0.307	-0.383	-0.231	2.31e-15	26759	NA	NA
Volume	ASAT	20519	Recent feelings of tiredness or low energy	Online follow-up	Depression	ORDERED-LOGISTIC	0.241	0.181	0.3	2.9e-15	26756	NA	NA
Volume	ASAT	981	Duration walking for pleasure	Lifestyle and History	Lifestyle and environment	ORDERED-LOGISTIC	-0.216	-0.269	-0.162	3.56e-15	29078	NA	NA
Volume	ASAT	6034	Target heart rate achieved	Physical Measures	ECG during exercise	LOGISTIC-BINARY	0.983	0.738	1.23	4.16e-15	6160	544	5616
Volume	ASAT	30780	LDL direct	Biological samples	Cardiovascular	LINEAR	0.105	0.079	0.132	5.1e-15	36105	NA	NA
Volume	ASAT	25842	Volume of grey matter in Precuneous Cortex (left)	Physical Measures	Brain MRI	LINEAR	-0.129	-0.162	-0.0966	1.03e-14	19587	NA	NA
Volume	ASAT	1120	Weekly usage of mobile phone in last 3 months	Lifestyle and History	Lifestyle and environment	ORDERED-LOGISTIC	-0.196	-0.246	-0.146	1.07e-14	33021	NA	NA
Volume	ASAT	25873	Volume of grey matter in Planum Temporale (right)	Physical Measures	Brain MRI	LINEAR	-0.129	-0.162	-0.0966	1.09e-14	19587	NA	NA
Volume	ASAT	25804	"Volume of grey matter in Middle Temporal Gyrus, posterior division (left)"	Physical Measures	Brain MRI	LINEAR	-0.133	-0.167	-0.0992	1.56e-14	19587	NA	NA
Volume	ASAT	6159#1	Headache	Medical history	Health and medical history	LOGISTIC-BINARY	0.251	0.187	0.315	1.59e-14	38646	7879	30767
Volume	ASAT	25785	Volume of grey matter in Insular Cortex (right)	Physical Measures	Brain MRI	LINEAR	-0.125	-0.157	-0.0932	1.88e-14	19587	NA	NA
Volume	ASAT	25881	Volume of grey matter in Caudate (right)	Physical Measures	Brain MRI	LINEAR	-0.137	-0.172	-0.102	1.88e-14	19587	NA	NA
Volume	ASAT	6164#100	Types of physical activity in last 4 weeks	Lifestyle and History	Lifestyle and environment	LOGISTIC-BINARY	0.507	0.377	0.637	2.01e-14	38127	1318	36809
Volume	ASAT	21064	Sensitive stomach	Online follow-up	Digestive health	LOGISTIC-BINARY	0.3	0.223	0.377	2.05e-14	27767	5807	21960
Volume	ASAT	22037	MET minutes per week for walking	Lifestyle and History	Lifestyle and environment	LINEAR	-0.108	-0.136	-0.0805	2.18e-14	32885	NA	NA
Volume	ASAT	25840	"Volume of grey matter in Cingulate Gyrus, posterior division (left)"	Physical Measures	Brain MRI	LINEAR	-0.123	-0.154	-0.0913	2.58e-14	19587	NA	NA
Volume	ASAT	25880	Volume of grey matter in Caudate (left)	Physical Measures	Brain MRI	LINEAR	-0.138	-0.173	-0.102	3.05e-14	19587	NA	NA
Volume	ASAT	12685	Total peripheral resistance during PWA	Physical Measures	Heart MRI	LINEAR	-0.1	-0.126	-0.0742	3.74e-14	33590	NA	NA
Volume	ASAT	30650	Aspartate aminotransferase	Biological samples	Liver	LINEAR	-0.0963	-0.121	-0.0712	5.07e-14	36039	NA	NA
Volume	ASAT	20003#2038460150	Treatment/medication code: paracetamol	Medical history	Medications	LOGISTIC-BINARY	0.277	0.205	0.35	6.74e-14	38674	5629	33045
Volume	ASAT	4199	Position of pulse wave notch	Physical Measures	Arterial stiffness	LINEAR	0.168	0.124	0.212	8.19e-14	12807	NA	NA
Volume	ASAT	25834	Volume of grey matter in Subcallosal Cortex (left)	Physical Measures	Brain MRI	LINEAR	-0.122	-0.154	-0.0902	8.97e-14	19587	NA	NA
Volume	ASAT	25843	Volume of grey matter in Precuneous Cortex (right)	Physical Measures	Brain MRI	LINEAR	-0.124	-0.156	-0.0909	1.31e-13	19587	NA	NA
Volume	ASAT	1309	Fresh fruit intake	Lifestyle and History	Lifestyle and environment	ORDERED-LOGISTIC	-0.183	-0.232	-0.134	1.53e-13	37331	NA	NA
Volume	ASAT	30600	Albumin	Biological samples	Liver	LINEAR	-0.102	-0.129	-0.0747	1.54e-13	33034	NA	NA
Volume	ASAT	25860	Volume of grey matter in Occipital Fusiform Gyrus (left)	Physical Measures	Brain MRI	LINEAR	-0.125	-0.159	-0.0915	2.88e-13	19587	NA	NA
Volume	ASAT	1418-2	Milk type used	Lifestyle and History	Lifestyle and environment	MULTINOMIAL-LOGISTIC	NA	NA	NA	3.42e-13	NA	NA	NA
Volume	ASAT	2080	Frequency of tiredness / lethargy in last 2 weeks	Lifestyle and History	Psychosocial factors	ORDERED-LOGISTIC	0.186	0.135	0.236	6.65e-13	37990	NA	NA
Volume	ASAT	4195	Pulse wave reflection index	Physical Measures	Arterial stiffness	LINEAR	-0.157	-0.199	-0.114	6.68e-13	12807	NA	NA
Volume	ASAT	25918	Volume of grey matter in X Cerebellum (left)	Physical Measures	Brain MRI	LINEAR	-0.123	-0.157	-0.0895	6.82e-13	19587	NA	NA
Volume	ASAT	25858	Volume of grey matter in Temporal Occipital Fusiform Cortex (left)	Physical Measures	Brain MRI	LINEAR	-0.123	-0.157	-0.0888	1.71e-12	19587	NA	NA
Volume	ASAT	943	Frequency of stair climbing in last 4 weeks	Lifestyle and History	Lifestyle and environment	ORDERED-LOGISTIC	-0.168	-0.214	-0.121	1.85e-12	38043	NA	NA
Volume	ASAT	25787	Volume of grey matter in Superior Frontal Gyrus (right)	Physical Measures	Brain MRI	LINEAR	-0.123	-0.157	-0.0883	2.79e-12	19587	NA	NA
Volume	ASAT	991	Frequency of strenuous sports in last 4 weeks	Lifestyle and History	Lifestyle and environment	ORDERED-LOGISTIC	-0.471	-0.604	-0.339	3.46e-12	5588	NA	NA
Volume	ASAT	30640	Apolipoprotein B	Biological samples	Cardiovascular	LINEAR	0.093	0.0666	0.119	4.45e-12	36010	NA	NA
Volume	ASAT	25803	"Volume of grey matter in Middle Temporal Gyrus, anterior division (right)"	Physical Measures	Brain MRI	LINEAR	-0.121	-0.156	-0.087	4.75e-12	19587	NA	NA
Volume	ASAT	1170	Getting up in morning	Lifestyle and History	Lifestyle and environment	ORDERED-LOGISTIC	-0.176	-0.226	-0.126	5.05e-12	38127	NA	NA
Volume	ASAT	30060	MCH concentration	Biological samples	Red blood cells	LINEAR	-0.0903	-0.116	-0.0643	1.06e-11	36818	NA	NA
Volume	ASAT	25798	"Volume of grey matter in Superior Temporal Gyrus, anterior division (left)"	Physical Measures	Brain MRI	LINEAR	-0.118	-0.153	-0.084	1.4e-11	19587	NA	NA
Volume	ASAT	738	Average total household income before tax	Lifestyle and History	Sociodemographics	ORDERED-LOGISTIC	-0.165	-0.213	-0.117	1.88e-11	34927	NA	NA
Volume	ASAT	6179#2	Mineral and other dietary supplements: Glucosamine	Medical history	Health and medical history	LOGISTIC-BINARY	-0.225	-0.292	-0.159	2.32e-11	38116	7879	30237
Volume	ASAT	6154#100	"Medication for pain relief, constipation, heartburn"	Medical history	Health and medical history	LOGISTIC-BINARY	-0.183	-0.237	-0.129	2.68e-11	37911	23531	14380
Volume	ASAT	2624	Frequency of heavy DIY in last 4 weeks	Lifestyle and History	Lifestyle and environment	ORDERED-LOGISTIC	-0.242	-0.313	-0.171	2.72e-11	17660	NA	NA
Volume	ASAT	874	Duration of walks	Lifestyle and History	Lifestyle and environment	LINEAR	-0.0926	-0.12	-0.0651	3.96e-11	34023	NA	NA
Volume	ASAT	30040	MCV	Biological samples	Red blood cells	LINEAR	-0.0873	-0.113	-0.0614	4.17e-11	36819	NA	NA
Volume	ASAT	22604#4	Work hours - lumped category	Online follow-up	Employment history	LOGISTIC-BINARY	-0.248	-0.322	-0.175	4.53e-11	21105	8698	12407
Volume	ASAT	25857	"Volume of grey matter in Temporal Fusiform Cortex, posterior division (right)"	Physical Measures	Brain MRI	LINEAR	-0.109	-0.142	-0.0767	4.57e-11	19587	NA	NA
Volume	ASAT	1200	Sleeplessness / insomnia	Lifestyle and History	Lifestyle and environment	ORDERED-LOGISTIC	0.16	0.112	0.208	6.95e-11	38649	NA	NA
Volume	ASAT	1408	Cheese intake	Lifestyle and History	Lifestyle and environment	ORDERED-LOGISTIC	-0.159	-0.207	-0.111	8.28e-11	38018	NA	NA
Volume	ASAT	25871	Volume of grey matter in Heschl's Gyrus (includes H1 and H2) (right)	Physical Measures	Brain MRI	LINEAR	-0.108	-0.14	-0.0753	8.74e-11	19587	NA	NA
Volume	ASAT	22506-114	Tobacco smoking	Online follow-up	Medical information	MULTINOMIAL-LOGISTIC	NA	NA	NA	9e-11	NA	NA	NA
Volume	ASAT	2744	Birth weight of first child	Lifestyle and History	Sex-specific factors	ORDERED-LOGISTIC	-0.255	-0.333	-0.178	9.21e-11	15483	NA	NA
Volume	ASAT	1980	Worrier / anxious feelings	Lifestyle and History	Psychosocial factors	LOGISTIC-BINARY	0.174	0.121	0.227	1.04e-10	37850	19896	17954
Volume	ASAT	25021	Volume of amygdala (left)	Physical Measures	Brain MRI	LINEAR	-0.115	-0.15	-0.08	1.11e-10	19577	NA	NA
Volume	ASAT	25841	"Volume of grey matter in Cingulate Gyrus, posterior division (right)"	Physical Measures	Brain MRI	LINEAR	-0.105	-0.137	-0.0729	1.25e-10	19587	NA	NA
Volume	ASAT	5992	"ECG, phase duration"	Physical Measures	ECG during exercise	LOGISTIC-BINARY	-0.629	-0.823	-0.436	1.87e-10	6160	5326	834
Volume	ASAT	30200	Neutrophill percentage	Biological samples	White blood cells	LINEAR	0.0847	0.0584	0.111	2.81e-10	36763	NA	NA
Volume	ASAT	25020	Volume of hippocampus (right)	Physical Measures	Brain MRI	LINEAR	-0.109	-0.144	-0.0754	3.21e-10	19577	NA	NA
Volume	ASAT	30870	Triglycerides	Biological samples	Cardiovascular	LINEAR	0.0768	0.0526	0.101	5.55e-10	36157	NA	NA
Volume	ASAT	25786	Volume of grey matter in Superior Frontal Gyrus (left)	Physical Measures	Brain MRI	LINEAR	-0.109	-0.143	-0.0743	5.82e-10	19587	NA	NA
Volume	ASAT	25851	"Volume of grey matter in Parahippocampal Gyrus, posterior division (right)"	Physical Measures	Brain MRI	LINEAR	-0.109	-0.144	-0.0744	6.38e-10	19587	NA	NA
Volume	ASAT	25813	"Volume of grey matter in Inferior Temporal Gyrus, temporooccipital part (right)"	Physical Measures	Brain MRI	LINEAR	-0.105	-0.138	-0.0714	6.78e-10	19587	NA	NA
Volume	ASAT	25783	Volume of grey matter in Frontal Pole (right)	Physical Measures	Brain MRI	LINEAR	-0.0983	-0.13	-0.0671	6.89e-10	19587	NA	NA
Volume	ASAT	20127	Neuroticism score	Lifestyle and History	Psychosocial factors	ORDERED-LOGISTIC	0.151	0.103	0.199	8.16e-10	32592	NA	NA
Volume	ASAT	1438	Bread intake	Lifestyle and History	Lifestyle and environment	LINEAR	-0.0772	-0.102	-0.0525	9.05e-10	37534	NA	NA
Volume	ASAT	21025	Frequency of discomfort/pain in abdomen in last 3 months	Online follow-up	Digestive health	ORDERED-LOGISTIC	0.17	0.115	0.225	1.17e-09	30146	NA	NA
Volume	ASAT	25810	"Volume of grey matter in Inferior Temporal Gyrus, posterior division (left)"	Physical Measures	Brain MRI	LINEAR	-0.106	-0.14	-0.0717	1.22e-09	19587	NA	NA
Volume	ASAT	21002	Weight	Physical Measures	Body size measures	LINEAR	-0.0286	-0.0379	-0.0193	1.79e-09	38632	NA	NA
Volume	ASAT	30720	Cystatin C	Biological samples	Renal	LINEAR	0.0703	0.0473	0.0933	2.23e-09	36180	NA	NA
Volume	ASAT	6179#100	Mineral and other dietary supplements	Medical history	Health and medical history	LOGISTIC-BINARY	0.162	0.109	0.216	3.65e-09	38116	21649	16467
Volume	ASAT	25019	Volume of hippocampus (left)	Physical Measures	Brain MRI	LINEAR	-0.102	-0.136	-0.068	4.78e-09	19577	NA	NA
Volume	ASAT	25865	Volume of grey matter in Central Opercular Cortex (right)	Physical Measures	Brain MRI	LINEAR	-0.0981	-0.131	-0.0652	4.82e-09	19587	NA	NA
Volume	ASAT	25809	"Volume of grey matter in Inferior Temporal Gyrus, anterior division (right)"	Physical Measures	Brain MRI	LINEAR	-0.103	-0.137	-0.0681	5.6e-09	19587	NA	NA
Volume	ASAT	6020-01-01	Completion status of test	Physical Measures	ECG during exercise	MULTINOMIAL-LOGISTIC	NA	NA	NA	5.6e-09	NA	NA	NA
Volume	ASAT	1687	Comparative body size at age 10	Lifestyle and History	Early life factors	ORDERED-LOGISTIC	-0.149	-0.2	-0.0991	6.07e-09	38234	NA	NA
Volume	ASAT	25867	Volume of grey matter in Parietal Operculum Cortex (right)	Physical Measures	Brain MRI	LINEAR	-0.0984	-0.132	-0.0651	7.07e-09	19587	NA	NA
Volume	ASAT	2207	Wears glasses or contact lenses	Medical history	Health and medical history	LOGISTIC-BINARY	0.244	0.161	0.327	7.07e-09	38650	33937	4713
Volume	ASAT	25811	"Volume of grey matter in Inferior Temporal Gyrus, posterior division (right)"	Physical Measures	Brain MRI	LINEAR	-0.101	-0.135	-0.0667	7.65e-09	19587	NA	NA
Volume	ASAT	25892	Volume of grey matter in Brain-Stem	Physical Measures	Brain MRI	LINEAR	-0.0965	-0.129	-0.0637	8.01e-09	19587	NA	NA
Volume	ASAT	25805	"Volume of grey matter in Middle Temporal Gyrus, posterior division (right)"	Physical Measures	Brain MRI	LINEAR	-0.101	-0.135	-0.0665	8.09e-09	19587	NA	NA
Volume	ASAT	25799	"Volume of grey matter in Superior Temporal Gyrus, anterior division (right)"	Physical Measures	Brain MRI	LINEAR	-0.101	-0.136	-0.0666	9.08e-09	19587	NA	NA
Volume	ASAT	25864	Volume of grey matter in Central Opercular Cortex (left)	Physical Measures	Brain MRI	LINEAR	-0.0944	-0.127	-0.062	1.12e-08	19587	NA	NA
Volume	ASAT	30180	Lymphocyte percentage	Biological samples	White blood cells	LINEAR	-0.0759	-0.102	-0.0498	1.27e-08	36763	NA	NA
Volume	ASAT	25850	"Volume of grey matter in Parahippocampal Gyrus, posterior division (left)"	Physical Measures	Brain MRI	LINEAR	-0.0993	-0.134	-0.065	1.44e-08	19587	NA	NA
Volume	ASAT	21041	Degree to which abdominal pain/discomfort/altered bowel habits affect/interfere with life in general	Online follow-up	Digestive health	ORDERED-LOGISTIC	0.159	0.104	0.215	1.74e-08	30052	NA	NA
Volume	ASAT	1508-2	Coffee type	Lifestyle and History	Lifestyle and environment	MULTINOMIAL-LOGISTIC	NA	NA	NA	1.94e-08	NA	NA	NA
Volume	ASAT	4548	Health satisfaction	Lifestyle and History	Psychosocial factors	ORDERED-LOGISTIC	0.246	0.16	0.333	2.22e-08	12912	NA	NA
Volume	ASAT	25791	"Volume of grey matter in Inferior Frontal Gyrus, pars triangularis (right)"	Physical Measures	Brain MRI	LINEAR	-0.0999	-0.135	-0.0649	2.36e-08	19587	NA	NA
Volume	ASAT	30750	HbA1c	Biological samples	Diabetes	LINEAR	-0.0713	-0.0964	-0.0462	2.6e-08	35925	NA	NA
Volume	ASAT	30690	Cholesterol	Biological samples	Cardiovascular	LINEAR	0.0739	0.0478	0.1	3e-08	36183	NA	NA
Volume	ASAT	25863	Volume of grey matter in Frontal Operculum Cortex (right)	Physical Measures	Brain MRI	LINEAR	-0.0958	-0.13	-0.0617	3.52e-08	19587	NA	NA
Volume	ASAT	21035	Currently (in last 3 months) suffer from abdominal pain	Online follow-up	Digestive health	LOGISTIC-BINARY	0.187	0.121	0.254	3.72e-08	30115	8361	21754
Volume	ASAT	100002	Energy	Online follow-up	Estimated nutrients yesterday	LINEAR	-0.185	-0.252	-0.119	4.09e-08	5729	NA	NA
Volume	ASAT	6164#5	Types of physical activity in last 4 weeks: Heavy DIY (eg: weeding, lawn mowing, carpentry, digging)	Lifestyle and History	Lifestyle and environment	LOGISTIC-BINARY	-0.15	-0.204	-0.0964	4.46e-08	38127	18548	19579
Volume	ASAT	21033	Frequency of hard/lumpy stools in the last 3 months	Online follow-up	Digestive health	ORDERED-LOGISTIC	0.156	0.0996	0.213	6.13e-08	30149	NA	NA
Volume	ASAT	1960	Fed-up feelings	Lifestyle and History	Psychosocial factors	LOGISTIC-BINARY	0.151	0.0962	0.205	6.24e-08	38087	13531	24556
Volume	ASAT	6138#4	Qualifications: CSEs or equivalent	Lifestyle and History	Sociodemographics	LOGISTIC-BINARY	0.205	0.131	0.28	6.37e-08	38035	5318	32717
Volume	ASAT	2217	Age started wearing glasses	Medical history	Health and medical history	LINEAR	-0.0752	-0.102	-0.0479	6.66e-08	32861	NA	NA
Volume	ASAT	2306	Weight change compared with 1 year ago	Medical history	Health and medical history	ORDERED-LOGISTIC	0.143	0.0912	0.195	7.09e-08	38233	NA	NA
Volume	ASAT	1568	Average weekly red wine intake	Lifestyle and History	Lifestyle and environment	ORDERED-LOGISTIC	-0.153	-0.209	-0.0964	1.02e-07	29406	NA	NA
Volume	ASAT	6179#1	Mineral and other dietary supplements: Fish oil (including cod liver oil)	Medical history	Health and medical history	LOGISTIC-BINARY	-0.156	-0.214	-0.0987	1.05e-07	38116	12105	26011
Volume	ASAT	20004#1479	Operation code: varicose vein surgery	Medical history	Operations	LOGISTIC-BINARY	-0.392	-0.537	-0.247	1.07e-07	38674	1266	37408
Volume	ASAT	30810	Phosphate	Biological samples	Renal	LINEAR	-0.0721	-0.0988	-0.0453	1.29e-07	32983	NA	NA
Volume	ASAT	2296	Falls in the last year	Medical history	Health and medical history	ORDERED-LOGISTIC	0.186	0.117	0.254	1.31e-07	38639	NA	NA
Volume	ASAT	816	Job involves heavy manual or physical work	Lifestyle and History	Sociodemographics	ORDERED-LOGISTIC	-0.183	-0.251	-0.115	1.37e-07	26612	NA	NA
Volume	ASAT	6160#2	Leisure/social activities: Pub or social club	Lifestyle and History	Psychosocial factors	LOGISTIC-BINARY	-0.16	-0.22	-0.1	1.49e-07	38620	9982	28638
Volume	ASAT	100017	Magnesium	Online follow-up	Estimated nutrients yesterday	LINEAR	-0.181	-0.248	-0.113	1.56e-07	5729	NA	NA
Volume	ASAT	1950	Sensitivity / hurt feelings	Lifestyle and History	Psychosocial factors	LOGISTIC-BINARY	0.142	0.0886	0.195	1.61e-07	37715	19722	17993
Volume	ASAT	2000	Worry too long after embarrassment	Lifestyle and History	Psychosocial factors	LOGISTIC-BINARY	0.14	0.0875	0.193	1.94e-07	37369	18070	19299
Volume	ASAT	30500	Microalbumin in urine	Biological samples	Renal (urine)	LINEAR	-0.126	-0.173	-0.0784	1.99e-07	9647	NA	NA
Volume	ASAT	1220	Daytime sleeping	Lifestyle and History	Lifestyle and environment	ORDERED-LOGISTIC	-0.169	-0.234	-0.105	2.25e-07	38611	NA	NA
Volume	ASAT	25782	Volume of grey matter in Frontal Pole (left)	Physical Measures	Brain MRI	LINEAR	-0.0822	-0.113	-0.0511	2.29e-07	19587	NA	NA
Volume	ASAT	21056	Short of breath	Online follow-up	Digestive health	ORDERED-LOGISTIC	0.171	0.106	0.236	2.35e-07	30161	NA	NA
Volume	ASAT	6160#3	Leisure/social activities: Religious group	Lifestyle and History	Psychosocial factors	LOGISTIC-BINARY	0.191	0.119	0.264	2.58e-07	38620	5954	32666
Volume	ASAT	4204	Absence of notch position in the pulse waveform	Physical Measures	Arterial stiffness	LOGISTIC-BINARY	0.42	0.26	0.58	2.68e-07	12807	1263	11544
Volume	ASAT	25009	"Volume of brain, grey+white matter (normalised for head size)"	Physical Measures	Brain MRI	LINEAR	0.0777	0.0479	0.108	3.39e-07	19592	NA	NA
Volume	ASAT	25808	"Volume of grey matter in Inferior Temporal Gyrus, anterior division (left)"	Physical Measures	Brain MRI	LINEAR	-0.0898	-0.124	-0.0552	3.53e-07	19587	NA	NA
Volume	ASAT	25872	Volume of grey matter in Planum Temporale (left)	Physical Measures	Brain MRI	LINEAR	-0.0849	-0.118	-0.0522	3.65e-07	19587	NA	NA
Volume	ASAT	12680	Central augmentation pressure during PWA	Physical Measures	Heart MRI	LINEAR	0.0655	0.0402	0.0909	4.16e-07	33655	NA	NA
Volume	ASAT	21052	Degree bothered by chest pain in the last 3 months	Online follow-up	Digestive health	ORDERED-LOGISTIC	0.218	0.133	0.302	4.57e-07	30151	NA	NA
Volume	ASAT	30110	PDW	Biological samples	Platelets	LINEAR	-0.0667	-0.0928	-0.0405	5.78e-07	36820	NA	NA
Volume	ASAT	25801	"Volume of grey matter in Superior Temporal Gyrus, posterior division (right)"	Physical Measures	Brain MRI	LINEAR	-0.0863	-0.12	-0.0525	5.78e-07	19587	NA	NA
Volume	ASAT	12681	Augmentation index for PWA	Physical Measures	Heart MRI	LINEAR	0.0663	0.0402	0.0924	6.19e-07	33874	NA	NA
Volume	ASAT	100008	Total sugars	Online follow-up	Estimated nutrients yesterday	LINEAR	-0.174	-0.242	-0.105	6.35e-07	5729	NA	NA
Volume	ASAT	1538-0	Major dietary changes in the last 5 years	Lifestyle and History	Lifestyle and environment	MULTINOMIAL-LOGISTIC	NA	NA	NA	6.68e-07	NA	NA	NA
Volume	ASAT	30130	Monocyte count	Biological samples	White blood cells	LINEAR	0.0642	0.0387	0.0896	7.92e-07	36762	NA	NA
Volume	ASAT	25807	"Volume of grey matter in Middle Temporal Gyrus, temporooccipital part (right)"	Physical Measures	Brain MRI	LINEAR	-0.0856	-0.12	-0.0516	8.43e-07	19587	NA	NA
Volume	ASAT	21058	Degree bothered by urinary frequency/bladder irritability in the last 3 months	Online follow-up	Digestive health	ORDERED-LOGISTIC	0.145	0.0873	0.203	8.82e-07	30152	NA	NA
Volume	ASAT	20004#1501	Operation code: carpal tunnel surgery	Medical history	Operations	LOGISTIC-BINARY	-0.677	-0.947	-0.406	9.11e-07	38674	293	38381
Volume	ASAT	2237	Plays computer games	Lifestyle and History	Lifestyle and environment	ORDERED-LOGISTIC	0.149	0.089	0.208	1.02e-06	38666	NA	NA
Volume	ASAT	22126	Doctor diagnosed hayfever or allergic rhinitis	Online follow-up	Medical information	LOGISTIC-BINARY	0.205	0.123	0.288	1.06e-06	21525	4958	16567
Volume	ASAT	806	Job involves mainly walking or standing	Lifestyle and History	Sociodemographics	ORDERED-LOGISTIC	-0.14	-0.196	-0.0835	1.09e-06	26603	NA	NA
Volume	ASAT	25825	"Volume of grey matter in Lateral Occipital Cortex, superior division (right)"	Physical Measures	Brain MRI	LINEAR	-0.0833	-0.117	-0.0498	1.1e-06	19587	NA	NA
Volume	ASAT	2492	Taking other prescription medications	Medical history	Health and medical history	LOGISTIC-BINARY	0.134	0.0801	0.188	1.15e-06	38608	14657	23951
Volume	ASAT	25023	Volume of accumbens (left)	Physical Measures	Brain MRI	LINEAR	-0.0828	-0.116	-0.0494	1.22e-06	19577	NA	NA
Volume	ASAT	100001	Food weight	Online follow-up	Estimated nutrients yesterday	LINEAR	-0.168	-0.236	-0.0997	1.35e-06	5729	NA	NA
Volume	ASAT	728	Number of vehicles in household	Lifestyle and History	Sociodemographics	ORDERED-LOGISTIC	-0.119	-0.167	-0.0706	1.4e-06	38547	NA	NA
Volume	ASAT	21048	Degree bothered by back pain in the past 3 months	Online follow-up	Digestive health	ORDERED-LOGISTIC	0.136	0.08	0.193	2.14e-06	30162	NA	NA
Volume	ASAT	5984	"ECG, load"	Physical Measures	ECG during exercise	LINEAR	-0.108	-0.152	-0.0631	2.22e-06	6139	NA	NA
Volume	ASAT	21040	Satisfaction with bowel habits	Online follow-up	Digestive health	ORDERED-LOGISTIC	0.125	0.0732	0.177	2.23e-06	30044	NA	NA
Volume	ASAT	1299	Salad / raw vegetable intake	Lifestyle and History	Lifestyle and environment	ORDERED-LOGISTIC	-0.127	-0.179	-0.0741	2.38e-06	36384	NA	NA
Volume	ASAT	25838	"Volume of grey matter in Cingulate Gyrus, anterior division (left)"	Physical Measures	Brain MRI	LINEAR	-0.0846	-0.12	-0.0494	2.47e-06	19587	NA	NA
Volume	ASAT	6152#9	"Blood clot, DVT, bronchitis, emphysema, asthma, rhinitis, eczema, allergy diagnosed by doctor": Hayfever, allergic rhinitis or eczema	Medical history	Health and medical history	LOGISTIC-BINARY	0.141	0.0821	0.199	2.56e-06	38652	10038	28614
Volume	ASAT	12654	Number of automated diagnostic comments recorded during 12-lead ECG	Physical Measures	ECG at rest	ORDERED-LOGISTIC	-0.114	-0.161	-0.0663	2.57e-06	33667	NA	NA
Volume	ASAT	1130	Hands-free device/speakerphone use with mobile phone in last 3 month	Lifestyle and History	Lifestyle and environment	ORDERED-LOGISTIC	-0.16	-0.227	-0.093	2.83e-06	33103	NA	NA
Volume	ASAT	3146	Speed of sound through heel	Physical Measures	Bone-densitometry of heel	LINEAR	-0.0807	-0.115	-0.0466	3.4e-06	20747	NA	NA
Volume	ASAT	25824	"Volume of grey matter in Lateral Occipital Cortex, superior division (left)"	Physical Measures	Brain MRI	LINEAR	-0.0808	-0.115	-0.0467	3.54e-06	19587	NA	NA
Volume	ASAT	1021	Duration of light DIY	Lifestyle and History	Lifestyle and environment	ORDERED-LOGISTIC	-0.149	-0.212	-0.0859	3.6e-06	21067	NA	NA
Volume	ASAT	25870	Volume of grey matter in Heschl's Gyrus (includes H1 and H2) (left)	Physical Measures	Brain MRI	LINEAR	-0.0775	-0.11	-0.0446	3.78e-06	19587	NA	NA
Volume	ASAT	25004	Volume of ventricular cerebrospinal fluid	Physical Measures	Brain MRI	LINEAR	-0.0706	-0.101	-0.0405	4.26e-06	19592	NA	NA
Volume	ASAT	25795	Volume of grey matter in Precentral Gyrus (right)	Physical Measures	Brain MRI	LINEAR	-0.0773	-0.11	-0.0443	4.51e-06	19587	NA	NA
Volume	ASAT	100016	Potassium	Online follow-up	Estimated nutrients yesterday	LINEAR	-0.159	-0.228	-0.0913	4.59e-06	5729	NA	NA
Volume	ASAT	4200	Position of the shoulder on the pulse waveform	Physical Measures	Arterial stiffness	LINEAR	0.101	0.0575	0.144	4.85e-06	12807	NA	NA
Volume	ASAT	1110	Length of mobile phone use	Lifestyle and History	Lifestyle and environment	ORDERED-LOGISTIC	-0.11	-0.158	-0.063	4.92e-06	38470	NA	NA
Volume	ASAT	20403	Alchohol/day	Online follow-up	Alcohol use	ORDERED-LOGISTIC	-0.143	-0.205	-0.0815	5.27e-06	24847	NA	NA
Volume	ASAT	25833	Volume of grey matter in Juxtapositional Lobule Cortex (formerly Supplementary Motor Cortex) (right)	Physical Measures	Brain MRI	LINEAR	-0.0811	-0.116	-0.0461	5.4e-06	19587	NA	NA
Volume	ASAT	1011	Frequency of light DIY in last 4 weeks	Lifestyle and History	Lifestyle and environment	ORDERED-LOGISTIC	-0.145	-0.208	-0.0819	6.33e-06	21164	NA	NA
Volume	ASAT	3148	Heel bone mineral density (BMD)	Physical Measures	Bone-densitometry of heel	LINEAR	-0.0778	-0.112	-0.044	6.34e-06	20738	NA	NA
Volume	ASAT	6152#100	"Blood clot, DVT, bronchitis, emphysema, asthma, rhinitis, eczema, allergy diagnosed by doctor"	Medical history	Health and medical history	LOGISTIC-BINARY	-0.126	-0.181	-0.0712	6.55e-06	38652	26065	12587
Volume	ASAT	20544#16	Mental health problems ever diagnosed by a professional: Anorexia nervosa	Online follow-up	Mental distress	LOGISTIC-BINARY	-1.24	-1.77	-0.696	6.87e-06	26659	126	26533
Volume	ASAT	6146#3	Attendance/disability/mobility allowance: Blue badge	Lifestyle and History	Sociodemographics	LOGISTIC-BINARY	0.541	0.307	0.779	7.05e-06	38549	343	38206
Volume	ASAT	12684	End systolic pressure index during PWA	Physical Measures	Heart MRI	LINEAR	-0.0622	-0.0894	-0.0349	7.74e-06	33073	NA	NA
Volume	ASAT	5993	"ECG, number of stages in a phase"	Physical Measures	ECG during exercise	ORDERED-LOGISTIC	-0.326	-0.469	-0.182	8.5e-06	6160	NA	NA
Volume	ASAT	21024	Ever diagnosed with IBS	Online follow-up	Digestive health	LOGISTIC-BINARY	0.214	0.119	0.308	8.94e-06	29367	3349	26018
Volume	ASAT	6039	Duration of fitness test	Physical Measures	ECG during exercise	ORDERED-LOGISTIC	-0.292	-0.421	-0.163	9.15e-06	6160	NA	NA
Volume	ASAT	100005	Carbohydrate	Online follow-up	Estimated nutrients yesterday	LINEAR	-0.152	-0.219	-0.0847	9.76e-06	5729	NA	NA
Volume	ASAT	20425	Ever worried more than most people would in similar situation	Online follow-up	Anxiety	LOGISTIC-BINARY	0.177	0.0984	0.255	9.8e-06	22686	5771	16915
Volume	ASAT	3147	"Heel quantitative ultrasound index (QUI), direct entry"	Physical Measures	Bone-densitometry of heel	LINEAR	-0.076	-0.11	-0.0423	1.02e-05	20747	NA	NA
Volume	ASAT	78	"Heel bone mineral density (BMD) T-score, automated"	Physical Measures	Bone-densitometry of heel	LINEAR	-0.076	-0.11	-0.0423	1.02e-05	20747	NA	NA
Volume	ASAT	4198	Position of the pulse wave peak	Physical Measures	Arterial stiffness	LINEAR	0.0967	0.0535	0.14	1.16e-05	12807	NA	NA
Volume	ASAT	25819	"Volume of grey matter in Supramarginal Gyrus, anterior division (right)"	Physical Measures	Brain MRI	LINEAR	-0.0796	-0.115	-0.0439	1.21e-05	19587	NA	NA
Volume	ASAT	30030	Haematocrit percentage	Biological samples	Red blood cells	LINEAR	0.046	0.0253	0.0667	1.33e-05	36819	NA	NA
Volume	ASAT	25794	Volume of grey matter in Precentral Gyrus (left)	Physical Measures	Brain MRI	LINEAR	-0.0727	-0.106	-0.0399	1.44e-05	19587	NA	NA
Volume	ASAT	20004#1496	Operation code: knee surgery (not replacement)	Medical history	Operations	LOGISTIC-BINARY	-0.337	-0.49	-0.184	1.52e-05	38674	1081	37593
Volume	ASAT	5986	"ECG, phase time"	Physical Measures	ECG during exercise	LINEAR	-0.124	-0.181	-0.0675	1.77e-05	6160	NA	NA
Volume	VAT	30870	Triglycerides	Biological samples	Cardiovascular	LINEAR	0.399	0.382	0.416	1e-300	36157	NA	NA
Volume	VAT	23102	Whole body water mass	Physical Measures	Impedance	LINEAR	-0.129	-0.136	-0.123	1e-300	38202	NA	NA
Volume	VAT	23106	Whole body	Physical Measures	Impedance	LINEAR	0.266	0.255	0.277	1e-300	38200	NA	NA
Volume	VAT	23107	R leg	Physical Measures	Impedance	LINEAR	0.35	0.336	0.363	1e-300	38201	NA	NA
Volume	VAT	23108	L leg	Physical Measures	Impedance	LINEAR	0.351	0.337	0.365	1e-300	38199	NA	NA
Volume	VAT	23129	Trunk fat-free mass	Physical Measures	Impedance	LINEAR	-0.142	-0.149	-0.135	1e-300	38156	NA	NA
Volume	VAT	23130	Trunk predicted mass	Physical Measures	Impedance	LINEAR	-0.14	-0.147	-0.133	1e-300	38153	NA	NA
Volume	VAT	30300	HLSRC	Biological samples	Red blood cells	LINEAR	0.338	0.321	0.355	1e-300	36184	NA	NA
Volume	VAT	23101	Whole body FF mass	Physical Measures	Impedance	LINEAR	-0.126	-0.133	-0.12	1e-300	38202	NA	NA
Volume	VAT	23105	Basal metabolic rate	Physical Measures	Impedance	LINEAR	-0.116	-0.122	-0.11	1e-300	38201	NA	NA
Volume	VAT	30250	RC	Biological samples	Red blood cells	LINEAR	0.324	0.306	0.341	5.33e-289	36184	NA	NA
Volume	VAT	23113	Leg fat-free mass (right)	Physical Measures	Impedance	LINEAR	-0.123	-0.129	-0.116	1.78e-274	38195	NA	NA
Volume	VAT	23114	Leg predicted mass (right)	Physical Measures	Impedance	LINEAR	-0.122	-0.128	-0.115	5.36e-272	38195	NA	NA
Volume	VAT	30290	High light scatter reticulocyte percentage	Biological samples	Red blood cells	LINEAR	0.317	0.299	0.334	1.94e-270	36185	NA	NA
Volume	VAT	49	Hip circumference	Physical Measures	Body size measures	LINEAR	-0.199	-0.21	-0.188	4.14e-267	38649	NA	NA
Volume	VAT	12336	Ventricular rate	Physical Measures	ECG at rest	LINEAR	0.334	0.316	0.353	1.35e-266	33695	NA	NA
Volume	VAT	48	Waist circumference	Physical Measures	Body size measures	LINEAR	0.171	0.161	0.181	2.72e-263	38648	NA	NA
Volume	VAT	23099	Body fat %	Physical Measures	Impedance	LINEAR	0.162	0.153	0.171	1.19e-262	38184	NA	NA
Volume	VAT	30730	GGT	Biological samples	Liver	LINEAR	0.285	0.268	0.302	7.41e-245	36164	NA	NA
Volume	VAT	30240	Reticulocyte percentage	Biological samples	Red blood cells	LINEAR	0.299	0.281	0.317	1.69e-235	36185	NA	NA
Volume	VAT	23111	Leg fat percentage (right)	Physical Measures	Impedance	LINEAR	0.123	0.116	0.131	8.88e-228	38199	NA	NA
Volume	VAT	23127	Trunk fat percentage	Physical Measures	Impedance	LINEAR	0.196	0.184	0.208	9.67e-228	38167	NA	NA
Volume	VAT	12679	Number of beats in waveform average for PWA	Physical Measures	Heart MRI	LINEAR	0.315	0.296	0.334	9.2e-226	33879	NA	NA
Volume	VAT	30620	ALT	Biological samples	Liver	LINEAR	0.275	0.258	0.291	1.53e-222	36177	NA	NA
Volume	VAT	1687	Comparative body size at age 10	Lifestyle and History	Early life factors	ORDERED-LOGISTIC	-0.6	-0.636	-0.563	1.14e-221	38234	NA	NA
Volume	VAT	23115	Leg fat percentage (left)	Physical Measures	Impedance	LINEAR	0.116	0.109	0.124	2.5e-212	38194	NA	NA
Volume	VAT	23110	L arm	Physical Measures	Impedance	LINEAR	0.174	0.163	0.185	2.51e-211	38198	NA	NA
Volume	VAT	23128	Trunk fat mass	Physical Measures	Impedance	LINEAR	0.172	0.161	0.183	4.04e-210	38164	NA	NA
Volume	VAT	23125	Arm fat-free mass (left)	Physical Measures	Impedance	LINEAR	-0.109	-0.116	-0.102	4.05e-204	38180	NA	NA
Volume	VAT	23126	Arm predicted mass (left)	Physical Measures	Impedance	LINEAR	-0.109	-0.116	-0.102	1.54e-203	38178	NA	NA
Volume	VAT	102	"Pulse rate, automated reading"	Physical Measures	Blood pressure	LINEAR	0.284	0.265	0.302	2.84e-198	36318	NA	NA
Volume	VAT	23117	Leg fat-free mass (left)	Physical Measures	Impedance	LINEAR	-0.1	-0.107	-0.0936	3.34e-197	38190	NA	NA
Volume	VAT	23118	Leg predicted mass (left)	Physical Measures	Impedance	LINEAR	-0.0991	-0.106	-0.0926	3.03e-194	38190	NA	NA
Volume	VAT	23109	R arm	Physical Measures	Impedance	LINEAR	0.167	0.156	0.178	3.28e-194	38196	NA	NA
Volume	VAT	23100	Whole body fat mass	Physical Measures	Impedance	LINEAR	0.15	0.14	0.16	1.33e-192	38155	NA	NA
Volume	VAT	23112	Leg fat mass (right)	Physical Measures	Impedance	LINEAR	0.113	0.105	0.121	3.88e-172	38197	NA	NA
Volume	VAT	30760	HDL cholesterol	Biological samples	Cardiovascular	LINEAR	-0.235	-0.251	-0.218	1.42e-167	33022	NA	NA
Volume	VAT	30710	C-reactive protein	Biological samples	Cardiovascular	LINEAR	0.238	0.221	0.256	3.43e-161	36109	NA	NA
Volume	VAT	30830	SHBG	Biological samples	Cancer	LINEAR	-0.22	-0.237	-0.204	5.56e-154	32708	NA	NA
Volume	VAT	23116	Leg fat mass (left)	Physical Measures	Impedance	LINEAR	0.104	0.0965	0.112	5.7e-153	38194	NA	NA
Volume	VAT	30020	Heamoglobin conc.	Biological samples	Red blood cells	LINEAR	0.174	0.16	0.188	2.66e-126	36820	NA	NA
Volume	VAT	3062	FVC	Physical Measures	Spirometry	LINEAR	-0.144	-0.156	-0.132	2.42e-121	35719	NA	NA
Volume	VAT	30280	Immature reticulocyte fraction	Biological samples	Red blood cells	LINEAR	0.216	0.197	0.234	2.88e-118	36185	NA	NA
Volume	VAT	30000	White blood cell (leukocyte) count	Biological samples	White blood cells	LINEAR	0.215	0.197	0.233	1.12e-116	36819	NA	NA
Volume	VAT	23121	R arm FF mass	Physical Measures	Impedance	LINEAR	-0.0816	-0.0887	-0.0744	5.08e-111	38184	NA	NA
Volume	VAT	23122	R arm pred. mass	Physical Measures	Impedance	LINEAR	-0.0814	-0.0885	-0.0743	5.59e-111	38184	NA	NA
Volume	VAT	20151	"FVC, Best measure"	Physical Measures	Spirometry	LINEAR	-0.144	-0.157	-0.131	3.33e-110	29663	NA	NA
Volume	VAT	30030	Haematocrit percentage	Biological samples	Red blood cells	LINEAR	0.167	0.152	0.182	2.75e-109	36819	NA	NA
Volume	VAT	904	Number of days/week of vigorous physical activity 10+ minutes	Lifestyle and History	Lifestyle and environment	ORDERED-LOGISTIC	-0.383	-0.417	-0.349	8.05e-109	37971	NA	NA
Volume	VAT	20257	FVC Z-score	Physical Measures	Spirometry	LINEAR	0.225	0.205	0.245	5.55e-107	31781	NA	NA
Volume	VAT	30880	Urate	Biological samples	Renal	LINEAR	0.162	0.147	0.176	5.95e-105	36139	NA	NA
Volume	VAT	30530	Sodium in urine	Biological samples	Renal (urine)	LINEAR	0.195	0.178	0.213	7.5e-105	37378	NA	NA
Volume	VAT	2178	Overall health rating	Medical history	Health and medical history	ORDERED-LOGISTIC	0.412	0.375	0.45	8.55e-105	38606	NA	NA
Volume	VAT	30850	Testosterone	Biological samples	Cancer	LINEAR	-0.121	-0.133	-0.11	3.75e-91	33198	NA	NA
Volume	VAT	30010	Red blood cell (erythrocyte) count	Biological samples	Red blood cells	LINEAR	0.157	0.142	0.172	1.07e-88	36819	NA	NA
Volume	VAT	22039	Vigorous activity	Lifestyle and History	Lifestyle and environment	ORDERED-LOGISTIC	-0.382	-0.42	-0.345	1.34e-88	32885	NA	NA
Volume	VAT	30140	Neutrophill count	Biological samples	White blood cells	LINEAR	0.188	0.17	0.207	2.23e-88	36762	NA	NA
Volume	VAT	1309	Fresh fruit intake	Lifestyle and History	Lifestyle and environment	ORDERED-LOGISTIC	-0.359	-0.394	-0.324	1.85e-87	37331	NA	NA
Volume	VAT	1448-3	Bread type	Lifestyle and History	Lifestyle and environment	MULTINOMIAL-LOGISTIC	NA	NA	NA	1.07e-86	NA	NA	NA
Volume	VAT	3063	Forced expiratory volume in 1-second (FEV1)	Physical Measures	Spirometry	LINEAR	-0.128	-0.14	-0.115	6.24e-85	35719	NA	NA
Volume	VAT	1070	Time spent watching TV	Lifestyle and History	Lifestyle and environment	ORDERED-LOGISTIC	0.343	0.308	0.377	7.59e-85	35925	NA	NA
Volume	VAT	1319	Dried fruit intake	Lifestyle and History	Lifestyle and environment	ORDERED-LOGISTIC	-0.39	-0.43	-0.351	4.61e-83	34782	NA	NA
Volume	VAT	20150	"Forced expiratory volume in 1-second (FEV1), Best measure"	Physical Measures	Spirometry	LINEAR	-0.134	-0.148	-0.121	5.14e-82	29663	NA	NA
Volume	VAT	23123	Arm fat percentage (left)	Physical Measures	Impedance	LINEAR	0.0844	0.0757	0.093	9.17e-81	38184	NA	NA
Volume	VAT	21002	Weight	Physical Measures	Body size measures	LINEAR	-0.0647	-0.0714	-0.058	3e-80	38632	NA	NA
Volume	VAT	6164#2	Types of physical activity in last 4 weeks: Other exercises (eg: swimming, cycling, keep fit, bowling)	Lifestyle and History	Lifestyle and environment	LOGISTIC-BINARY	-0.367	-0.405	-0.328	4.19e-78	38127	21422	16705
Volume	VAT	30640	Apolipoprotein B	Biological samples	Cardiovascular	LINEAR	0.179	0.16	0.198	2.1e-77	36010	NA	NA
Volume	VAT	20256	FEV1 Z-score	Physical Measures	Spirometry	LINEAR	0.193	0.172	0.213	6.24e-77	31781	NA	NA
Volume	VAT	25035	Median T2star in hippocampus (right)	Physical Measures	Brain MRI	LINEAR	-0.235	-0.26	-0.21	5.79e-74	18120	NA	NA
Volume	VAT	6164#3	Recent strenuous sports	Lifestyle and History	Lifestyle and environment	LOGISTIC-BINARY	-0.514	-0.57	-0.458	3.27e-72	38127	5653	32474
Volume	VAT	30510	Creatinine (enzymatic) in urine	Biological samples	Renal (urine)	LINEAR	0.153	0.137	0.17	9.45e-71	37440	NA	NA
Volume	VAT	1458	Cereal intake	Lifestyle and History	Lifestyle and environment	ORDERED-LOGISTIC	-0.32	-0.355	-0.284	1.89e-69	37014	NA	NA
Volume	VAT	4194	Pulse rate	Physical Measures	Arterial stiffness	LINEAR	0.279	0.248	0.31	2.44e-68	12807	NA	NA
Volume	VAT	30750	HbA1c	Biological samples	Diabetes	LINEAR	0.156	0.138	0.174	1.4e-64	35925	NA	NA
Volume	VAT	12340	QRS duration	Physical Measures	ECG at rest	LINEAR	-0.155	-0.173	-0.137	2.32e-63	33690	NA	NA
Volume	VAT	25034	Median T2star in hippocampus (left)	Physical Measures	Brain MRI	LINEAR	-0.217	-0.243	-0.192	1.24e-62	18120	NA	NA
Volume	VAT	6138#1	Qualifications: College or University degree	Lifestyle and History	Sociodemographics	LOGISTIC-BINARY	-0.327	-0.366	-0.288	1.1e-60	38035	17653	20382
Volume	VAT	23119	Arm fat percentage (right)	Physical Measures	Impedance	LINEAR	0.0736	0.0648	0.0824	7.15e-60	38188	NA	NA
Volume	VAT	6150#100	Vascular/heart problems	Medical history	Health and medical history	LOGISTIC-BINARY	-0.375	-0.42	-0.33	1.8e-59	38635	30316	8319
Volume	VAT	12687	Mean arterial pressure during PWA	Physical Measures	Heart MRI	LINEAR	0.158	0.139	0.178	7.56e-59	33664	NA	NA
Volume	VAT	4079	"Diastolic blood pressure, automated reading"	Physical Measures	Blood pressure	LINEAR	0.147	0.129	0.165	1.71e-58	36318	NA	NA
Volume	VAT	6150#4	High blood pressure	Medical history	Health and medical history	LOGISTIC-BINARY	0.37	0.324	0.416	8.45e-56	38635	7691	30944
Volume	VAT	30130	Monocyte count	Biological samples	White blood cells	LINEAR	0.145	0.127	0.163	4.93e-55	36762	NA	NA
Volume	VAT	2139	Age first had sexual intercourse	Lifestyle and History	Lifestyle and environment	LINEAR	-0.146	-0.164	-0.127	1.43e-54	35828	NA	NA
Volume	VAT	50	Standing height	Physical Measures	Body size measures	LINEAR	-0.0216	-0.0244	-0.0189	1.07e-53	38644	NA	NA
Volume	VAT	22033	Summed days activity	Lifestyle and History	Lifestyle and environment	LINEAR	-0.152	-0.172	-0.133	5.46e-53	33698	NA	NA
Volume	VAT	46	Hand grip strength (left)	Physical Measures	Hand grip strength	LINEAR	-0.0941	-0.106	-0.082	3.38e-52	38570	NA	NA
Volume	VAT	22032	IPAQ activity group	Lifestyle and History	Lifestyle and environment	ORDERED-LOGISTIC	-0.29	-0.328	-0.252	5.36e-51	32885	NA	NA
Volume	VAT	1468-3	Cereal type	Lifestyle and History	Lifestyle and environment	MULTINOMIAL-LOGISTIC	NA	NA	NA	9.9e-51	NA	NA	NA
Volume	VAT	6160#1	Leisure/social activities: Sports club or gym	Lifestyle and History	Psychosocial factors	LOGISTIC-BINARY	-0.301	-0.341	-0.262	2.05e-50	38620	13933	24687
Volume	VAT	25006	Volume of grey matter	Physical Measures	Brain MRI	LINEAR	-0.156	-0.177	-0.135	7.66e-50	19592	NA	NA
Volume	VAT	6162#4	Types of transport used (excluding work): Cycle	Lifestyle and History	Lifestyle and environment	LOGISTIC-BINARY	-0.536	-0.607	-0.464	9.68e-49	38128	3246	34882
Volume	VAT	47	Hand grip strength (right)	Physical Measures	Hand grip strength	LINEAR	-0.0898	-0.102	-0.0777	1.44e-47	38562	NA	NA
Volume	VAT	137	Number of treatments/medications taken	Medical history	Medications	ORDERED-LOGISTIC	0.262	0.227	0.298	2.76e-47	38674	NA	NA
Volume	VAT	30120	Lymphocyte count	Biological samples	White blood cells	LINEAR	0.134	0.116	0.153	3.19e-46	36762	NA	NA
Volume	VAT	22035	Above moderate/vigorous recommendation	Lifestyle and History	Lifestyle and environment	LOGISTIC-BINARY	-0.296	-0.336	-0.255	7.07e-46	32885	17759	15126
Volume	VAT	25002	Volume of peripheral cortical grey matter	Physical Measures	Brain MRI	LINEAR	-0.148	-0.169	-0.128	1.51e-44	19592	NA	NA
Volume	VAT	2492	Taking other prescription medications	Medical history	Health and medical history	LOGISTIC-BINARY	0.278	0.239	0.317	1.52e-44	38608	14657	23951
Volume	VAT	12681	Augmentation index for PWA	Physical Measures	Heart MRI	LINEAR	0.133	0.114	0.152	3.44e-44	33874	NA	NA
Volume	VAT	30630	Apolipoprotein A	Biological samples	Cardiovascular	LINEAR	-0.124	-0.141	-0.106	8.76e-44	32850	NA	NA
Volume	VAT	21056	Short of breath	Online follow-up	Digestive health	ORDERED-LOGISTIC	0.326	0.28	0.373	1.35e-42	30161	NA	NA
Volume	VAT	6143#4	Transport type for commuting to job workplace: Cycle	Lifestyle and History	Sociodemographics	LOGISTIC-BINARY	-0.646	-0.739	-0.554	1.63e-42	24407	1999	22408
Volume	VAT	2316	Wheeze in last year	Medical history	Health and medical history	LOGISTIC-BINARY	0.334	0.285	0.382	1.15e-41	38152	6313	31839
Volume	VAT	25010	"Volume of brain, grey+white matter"	Physical Measures	Brain MRI	LINEAR	-0.138	-0.158	-0.118	4.73e-41	19592	NA	NA
Volume	VAT	25037	Median T2star in amygdala (right)	Physical Measures	Brain MRI	LINEAR	-0.177	-0.204	-0.151	2.8e-40	18120	NA	NA
Volume	VAT	2443	Diabetes	Medical history	Health and medical history	LOGISTIC-BINARY	0.666	0.567	0.765	7.2e-40	38619	1024	37595
Volume	VAT	21038	Currently suffer from abdominal distension	Online follow-up	Digestive health	LOGISTIC-BINARY	0.368	0.313	0.423	3.24e-39	30102	6691	23411
Volume	VAT	20154	"Forced expiratory volume in 1-second (FEV1), predicted percentage"	Physical Measures	Spirometry	LINEAR	-0.213	-0.245	-0.181	1.45e-38	12626	NA	NA
Volume	VAT	25849	"Volume of grey matter in Parahippocampal Gyrus, anterior division (right)"	Physical Measures	Brain MRI	LINEAR	-0.15	-0.173	-0.127	2.3e-37	19587	NA	NA
Volume	VAT	2188	Disability	Medical history	Health and medical history	LOGISTIC-BINARY	0.278	0.235	0.321	3.28e-37	38049	9128	28921
Volume	VAT	30610	ALP	Biological samples	Bone and joint	LINEAR	0.119	0.1	0.137	2.17e-36	36184	NA	NA
Volume	VAT	3637	Frequency of other exercises in last 4 weeks	Lifestyle and History	Lifestyle and environment	ORDERED-LOGISTIC	-0.296	-0.342	-0.25	4.73e-36	21274	NA	NA
Volume	VAT	25848	"Volume of grey matter in Parahippocampal Gyrus, anterior division (left)"	Physical Measures	Brain MRI	LINEAR	-0.149	-0.172	-0.126	6.98e-36	19587	NA	NA
Volume	VAT	30770	IGF-1	Biological samples	Cancer	LINEAR	-0.116	-0.134	-0.0976	1.38e-35	36002	NA	NA
Volume	VAT	12698	Diastolic brachial blood pressure	Physical Measures	Heart MRI	LINEAR	0.121	0.102	0.14	2.65e-35	34022	NA	NA
Volume	VAT	30080	Platelet count	Biological samples	Platelets	LINEAR	0.115	0.0966	0.133	2.82e-35	36820	NA	NA
Volume	VAT	25854	"Volume of grey matter in Temporal Fusiform Cortex, anterior division (left)"	Physical Measures	Brain MRI	LINEAR	-0.147	-0.17	-0.123	6.47e-34	19587	NA	NA
Volume	VAT	25797	Volume of grey matter in Temporal Pole (right)	Physical Measures	Brain MRI	LINEAR	-0.144	-0.167	-0.121	1.14e-33	19587	NA	NA
Volume	VAT	3064	Peak expiratory flow (PEF)	Physical Measures	Spirometry	LINEAR	-0.0923	-0.107	-0.0773	1.34e-33	35719	NA	NA
Volume	VAT	22040	Summed MET minutes per week for all activity	Lifestyle and History	Lifestyle and environment	LINEAR	-0.121	-0.141	-0.101	2.93e-33	32885	NA	NA
Volume	VAT	25012	Volume of thalamus (right)	Physical Measures	Brain MRI	LINEAR	-0.132	-0.153	-0.11	3.16e-33	19577	NA	NA
Volume	VAT	25795	Volume of grey matter in Precentral Gyrus (right)	Physical Measures	Brain MRI	LINEAR	-0.146	-0.169	-0.122	3.93e-33	19587	NA	NA
Volume	VAT	20459	Happy with health	Online follow-up	Happiness and subjective well-being	ORDERED-LOGISTIC	0.256	0.214	0.298	6.13e-33	26748	NA	NA
Volume	VAT	6154#100	"Medication for pain relief, constipation, heartburn"	Medical history	Health and medical history	LOGISTIC-BINARY	-0.237	-0.276	-0.198	9.11e-33	37911	23531	14380
Volume	VAT	30090	Platelet crit	Biological samples	Platelets	LINEAR	0.108	0.0904	0.126	9.71e-33	36820	NA	NA
Volume	VAT	20022	Birth weight	Lifestyle and History	Early life factors	LINEAR	-0.14	-0.164	-0.117	1.27e-31	23122	NA	NA
Volume	VAT	20003#1140884600	Metformin	Medical history	Medications	LOGISTIC-BINARY	0.777	0.646	0.908	2.92e-31	38674	525	38149
Volume	VAT	884	Number of days/week of moderate physical activity 10+ minutes	Lifestyle and History	Lifestyle and environment	ORDERED-LOGISTIC	-0.195	-0.228	-0.162	4.03e-31	37745	NA	NA
Volume	VAT	4200	Position of the shoulder on the pulse waveform	Physical Measures	Arterial stiffness	LINEAR	0.18	0.15	0.211	4.88e-31	12807	NA	NA
Volume	VAT	5983	"ECG, heart rate"	Physical Measures	ECG during exercise	LINEAR	0.268	0.222	0.313	6.17e-31	6129	NA	NA
Volume	VAT	25011	Volume of thalamus (left)	Physical Measures	Brain MRI	LINEAR	-0.128	-0.15	-0.107	8.04e-31	19577	NA	NA
Volume	VAT	25855	"Volume of grey matter in Temporal Fusiform Cortex, anterior division (right)"	Physical Measures	Brain MRI	LINEAR	-0.138	-0.161	-0.115	1.13e-30	19587	NA	NA
Volume	VAT	6160#2	Leisure/social activities: Pub or social club	Lifestyle and History	Psychosocial factors	LOGISTIC-BINARY	0.243	0.202	0.285	1.43e-30	38620	9982	28638
Volume	VAT	25036	Median T2star in amygdala (left)	Physical Measures	Brain MRI	LINEAR	-0.153	-0.179	-0.127	3.12e-30	18120	NA	NA
Volume	VAT	12683	End systolic pressure during PWA	Physical Measures	Heart MRI	LINEAR	0.111	0.0921	0.13	3.8e-30	33591	NA	NA
Volume	VAT	21060	Tired	Online follow-up	Digestive health	ORDERED-LOGISTIC	0.235	0.195	0.276	4.25e-30	30162	NA	NA
Volume	VAT	30860	Total protein	Biological samples	Renal	LINEAR	0.114	0.0945	0.134	5.24e-30	32990	NA	NA
Volume	VAT	4199	Position of pulse wave notch	Physical Measures	Arterial stiffness	LINEAR	0.18	0.149	0.211	6.17e-30	12807	NA	NA
Volume	VAT	25796	Volume of grey matter in Temporal Pole (left)	Physical Measures	Brain MRI	LINEAR	-0.133	-0.156	-0.11	7.14e-30	19587	NA	NA
Volume	VAT	30780	LDL direct	Biological samples	Cardiovascular	LINEAR	0.11	0.0907	0.129	8.17e-30	36105	NA	NA
Volume	VAT	30890	Vitamin D	Biological samples	Bone and joint	LINEAR	-0.108	-0.127	-0.0893	1.71e-29	34747	NA	NA
Volume	VAT	25911	Volume of grey matter in VIIIa Cerebellum (right)	Physical Measures	Brain MRI	LINEAR	-0.141	-0.165	-0.116	1.82e-29	19587	NA	NA
Volume	VAT	20003#1140861958	Treatment/medication code: simvastatin	Medical history	Medications	LOGISTIC-BINARY	0.365	0.301	0.429	4.96e-29	38674	2955	35719
Volume	VAT	25028	Median T2star in caudate (left)	Physical Measures	Brain MRI	LINEAR	-0.151	-0.178	-0.124	1.69e-28	18120	NA	NA
Volume	VAT	25815	Volume of grey matter in Postcentral Gyrus (right)	Physical Measures	Brain MRI	LINEAR	-0.139	-0.164	-0.115	1.69e-28	19587	NA	NA
Volume	VAT	12680	Central augmentation pressure during PWA	Physical Measures	Heart MRI	LINEAR	0.103	0.0847	0.121	1.99e-28	33655	NA	NA
Volume	VAT	1538-0	Major dietary changes in the last 5 years	Lifestyle and History	Lifestyle and environment	MULTINOMIAL-LOGISTIC	NA	NA	NA	3.13e-28	NA	NA	NA
Volume	VAT	25908	Volume of grey matter in VIIb Cerebellum (right)	Physical Measures	Brain MRI	LINEAR	-0.139	-0.164	-0.115	3.61e-28	19587	NA	NA
Volume	VAT	1478	Salt added to food	Lifestyle and History	Lifestyle and environment	ORDERED-LOGISTIC	0.203	0.167	0.239	7.38e-28	38668	NA	NA
Volume	VAT	25794	Volume of grey matter in Precentral Gyrus (left)	Physical Measures	Brain MRI	LINEAR	-0.129	-0.153	-0.106	7.37e-27	19587	NA	NA
Volume	VAT	25886	Volume of grey matter in Hippocampus (left)	Physical Measures	Brain MRI	LINEAR	-0.128	-0.152	-0.105	8.27e-27	19587	NA	NA
Volume	VAT	25920	Volume of grey matter in X Cerebellum (right)	Physical Measures	Brain MRI	LINEAR	-0.132	-0.157	-0.108	1.01e-26	19587	NA	NA
Volume	VAT	25846	Volume of grey matter in Frontal Orbital Cortex (left)	Physical Measures	Brain MRI	LINEAR	-0.124	-0.146	-0.101	1.46e-26	19587	NA	NA
Volume	VAT	6179#2	Mineral and other dietary supplements: Glucosamine	Medical history	Health and medical history	LOGISTIC-BINARY	-0.261	-0.309	-0.213	1.88e-26	38116	7879	30237
Volume	VAT	1418-2	Milk type used	Lifestyle and History	Lifestyle and environment	MULTINOMIAL-LOGISTIC	NA	NA	NA	3.29e-26	NA	NA	NA
Volume	VAT	25008	Volume of white matter	Physical Measures	Brain MRI	LINEAR	-0.109	-0.129	-0.0883	1.74e-25	19592	NA	NA
Volume	VAT	20116-0	Smoking status	Lifestyle and History	Lifestyle and environment	MULTINOMIAL-LOGISTIC	NA	NA	NA	2.15e-25	NA	NA	NA
Volume	VAT	1349	Processed meat intake	Lifestyle and History	Lifestyle and environment	ORDERED-LOGISTIC	0.175	0.142	0.209	1.76e-24	38642	NA	NA
Volume	VAT	30270	MSCV	Biological samples	Red blood cells	LINEAR	-0.0974	-0.116	-0.0787	2.07e-24	36185	NA	NA
Volume	VAT	6164#100	Types of physical activity in last 4 weeks	Lifestyle and History	Lifestyle and environment	LOGISTIC-BINARY	0.508	0.41	0.606	2.13e-24	38127	1318	36809
Volume	VAT	1428-3	Spread type	Lifestyle and History	Lifestyle and environment	MULTINOMIAL-LOGISTIC	NA	NA	NA	4e-24	NA	NA	NA
Volume	VAT	25864	Volume of grey matter in Central Opercular Cortex (left)	Physical Measures	Brain MRI	LINEAR	-0.12	-0.144	-0.0971	4.56e-24	19587	NA	NA
Volume	VAT	25906	Volume of grey matter in VIIb Cerebellum (left)	Physical Measures	Brain MRI	LINEAR	-0.128	-0.153	-0.103	4.59e-24	19587	NA	NA
Volume	VAT	30520	Potassium in urine	Biological samples	Renal (urine)	LINEAR	0.0941	0.0759	0.112	5.51e-24	37355	NA	NA
Volume	VAT	12686	Stroke volume during PWA	Physical Measures	Heart MRI	LINEAR	-0.0956	-0.114	-0.077	7.03e-24	33109	NA	NA
Volume	VAT	4198	Position of the pulse wave peak	Physical Measures	Arterial stiffness	LINEAR	0.157	0.126	0.187	8.15e-24	12807	NA	NA
Volume	VAT	25784	Volume of grey matter in Insular Cortex (left)	Physical Measures	Brain MRI	LINEAR	-0.119	-0.142	-0.0955	9.82e-24	19587	NA	NA
Volume	VAT	20161	Pack years of smoking	Lifestyle and History	Lifestyle and environment	LINEAR	0.173	0.139	0.206	1.04e-23	9632	NA	NA
Volume	VAT	25804	"Volume of grey matter in Middle Temporal Gyrus, posterior division (left)"	Physical Measures	Brain MRI	LINEAR	-0.125	-0.15	-0.101	1.11e-23	19587	NA	NA
Volume	VAT	6138#2	Qualifications: A levels/AS levels or equivalent	Lifestyle and History	Sociodemographics	LOGISTIC-BINARY	-0.204	-0.244	-0.164	1.18e-23	38035	13996	24039
Volume	VAT	25865	Volume of grey matter in Central Opercular Cortex (right)	Physical Measures	Brain MRI	LINEAR	-0.121	-0.145	-0.0973	1.21e-23	19587	NA	NA
Volume	VAT	25802	"Volume of grey matter in Middle Temporal Gyrus, anterior division (left)"	Physical Measures	Brain MRI	LINEAR	-0.124	-0.148	-0.0998	1.39e-23	19587	NA	NA
Volume	VAT	25030	L putamen T2*	Physical Measures	Brain MRI	LINEAR	-0.135	-0.162	-0.109	1.58e-23	18120	NA	NA
Volume	VAT	21001	Body mass index (BMI)	Physical Measures	Body size measures	LINEAR	-0.044	-0.0527	-0.0354	2e-23	38627	NA	NA
Volume	VAT	2714	Age when periods started (menarche)	Lifestyle and History	Sex-specific factors	ORDERED-LOGISTIC	0.323	0.259	0.387	2.74e-23	19548	NA	NA
Volume	VAT	12697	Systolic brachial blood pressure	Physical Measures	Heart MRI	LINEAR	0.0945	0.0759	0.113	3.34e-23	34020	NA	NA
Volume	VAT	21064	Sensitive stomach	Online follow-up	Digestive health	LOGISTIC-BINARY	0.281	0.226	0.337	4.96e-23	27767	5807	21960
Volume	VAT	25847	Volume of grey matter in Frontal Orbital Cortex (right)	Physical Measures	Brain MRI	LINEAR	-0.116	-0.139	-0.0929	5.15e-23	19587	NA	NA
Volume	VAT	6138#100	Qualifications	Lifestyle and History	Sociodemographics	LOGISTIC-BINARY	0.37	0.296	0.443	8.19e-23	38035	2463	35572
Volume	VAT	20162	% life smoking	Lifestyle and History	Lifestyle and environment	LINEAR	0.17	0.136	0.204	1.03e-22	9632	NA	NA
Volume	VAT	2335	Chest pain or discomfort	Medical history	Health and medical history	LOGISTIC-BINARY	0.258	0.206	0.31	1.2e-22	38400	5266	33134
Volume	VAT	22036	Above moderate/vigorous/walking recommendation	Lifestyle and History	Lifestyle and environment	LOGISTIC-BINARY	-0.247	-0.297	-0.198	1.64e-22	32885	26628	6257
Volume	VAT	25803	"Volume of grey matter in Middle Temporal Gyrus, anterior division (right)"	Physical Measures	Brain MRI	LINEAR	-0.123	-0.147	-0.0979	3.19e-22	19587	NA	NA
Volume	VAT	25787	Volume of grey matter in Superior Frontal Gyrus (right)	Physical Measures	Brain MRI	LINEAR	-0.122	-0.147	-0.0977	3.63e-22	19587	NA	NA
Volume	VAT	25889	Volume of grey matter in Amygdala (right)	Physical Measures	Brain MRI	LINEAR	-0.114	-0.137	-0.0909	3.65e-22	19587	NA	NA
Volume	VAT	25783	Volume of grey matter in Frontal Pole (right)	Physical Measures	Brain MRI	LINEAR	-0.111	-0.134	-0.0886	3.67e-22	19587	NA	NA
Volume	VAT	25873	Volume of grey matter in Planum Temporale (right)	Physical Measures	Brain MRI	LINEAR	-0.117	-0.14	-0.0929	4.5e-22	19587	NA	NA
Volume	VAT	30690	Cholesterol	Biological samples	Cardiovascular	LINEAR	0.0921	0.0733	0.111	6.25e-22	36183	NA	NA
Volume	VAT	680-1	Own or rent accommodation lived in	Lifestyle and History	Sociodemographics	MULTINOMIAL-LOGISTIC	NA	NA	NA	6.5e-22	NA	NA	NA
Volume	VAT	3143	Ankle spacing width	Physical Measures	Bone-densitometry of heel	LINEAR	-0.083	-0.0999	-0.0661	6.73e-22	20747	NA	NA
Volume	VAT	30720	Cystatin C	Biological samples	Renal	LINEAR	0.081	0.0645	0.0975	7.72e-22	36180	NA	NA
Volume	VAT	25905	Volume of grey matter in Crus II Cerebellum (right)	Physical Measures	Brain MRI	LINEAR	-0.121	-0.145	-0.096	8.08e-22	19587	NA	NA
Volume	VAT	924	Usual walking pace	Lifestyle and History	Lifestyle and environment	ORDERED-LOGISTIC	-0.185	-0.223	-0.147	1.5e-21	38610	NA	NA
Volume	VAT	25018	Volume of pallidum (right)	Physical Measures	Brain MRI	LINEAR	-0.117	-0.141	-0.0932	1.6e-21	19577	NA	NA
Volume	VAT	25834	Volume of grey matter in Subcallosal Cortex (left)	Physical Measures	Brain MRI	LINEAR	-0.112	-0.135	-0.0892	2.02e-21	19587	NA	NA
Volume	VAT	25856	"Volume of grey matter in Temporal Fusiform Cortex, posterior division (left)"	Physical Measures	Brain MRI	LINEAR	-0.112	-0.136	-0.0893	2.22e-21	19587	NA	NA
Volume	VAT	1498	Coffee intake	Lifestyle and History	Lifestyle and environment	ORDERED-LOGISTIC	-0.175	-0.211	-0.139	2.51e-21	35578	NA	NA
Volume	VAT	25029	L caudate T2*	Physical Measures	Brain MRI	LINEAR	-0.129	-0.156	-0.102	4.1e-21	18120	NA	NA
Volume	VAT	25814	Volume of grey matter in Postcentral Gyrus (left)	Physical Measures	Brain MRI	LINEAR	-0.118	-0.142	-0.0932	4.18e-21	19587	NA	NA
Volume	VAT	25888	Volume of grey matter in Amygdala (left)	Physical Measures	Brain MRI	LINEAR	-0.111	-0.134	-0.0878	4.94e-21	19587	NA	NA
Volume	VAT	25031	R putamen T2*	Physical Measures	Brain MRI	LINEAR	-0.128	-0.155	-0.102	5.08e-21	18120	NA	NA
Volume	VAT	25785	Volume of grey matter in Insular Cortex (right)	Physical Measures	Brain MRI	LINEAR	-0.109	-0.132	-0.0858	2.56e-20	19587	NA	NA
Volume	VAT	4196	Pulse wave peak to peak time	Physical Measures	Arterial stiffness	LINEAR	-0.144	-0.175	-0.113	3.56e-20	12802	NA	NA
Volume	VAT	25899	Volume of grey matter in VI Cerebellum (right)	Physical Measures	Brain MRI	LINEAR	-0.113	-0.137	-0.0888	3.72e-20	19587	NA	NA
Volume	VAT	21052	Degree bothered by chest pain in the last 3 months	Online follow-up	Digestive health	ORDERED-LOGISTIC	0.284	0.223	0.345	4.33e-20	30151	NA	NA
Volume	VAT	25891	Volume of grey matter in Ventral Striatum (right)	Physical Measures	Brain MRI	LINEAR	-0.11	-0.134	-0.0868	4.65e-20	19587	NA	NA
Volume	VAT	21041	Degree to which abdominal pain/discomfort/altered bowel habits affect/interfere with life in general	Online follow-up	Digestive health	ORDERED-LOGISTIC	0.186	0.146	0.226	4.79e-20	30052	NA	NA
Volume	VAT	25782	Volume of grey matter in Frontal Pole (left)	Physical Measures	Brain MRI	LINEAR	-0.105	-0.127	-0.0823	5.62e-20	19587	NA	NA
Volume	VAT	30650	Aspartate aminotransferase	Biological samples	Liver	LINEAR	0.0836	0.0656	0.102	9.43e-20	36039	NA	NA
Volume	VAT	25887	Volume of grey matter in Hippocampus (right)	Physical Measures	Brain MRI	LINEAR	-0.109	-0.133	-0.0856	1.2e-19	19587	NA	NA
Volume	VAT	4080	"Systolic blood pressure, automated reading"	Physical Measures	Blood pressure	LINEAR	0.0803	0.0629	0.0976	1.27e-19	36318	NA	NA
Volume	VAT	20004#1357	Operation code: hysterectomy	Medical history	Operations	LOGISTIC-BINARY	0.446	0.349	0.542	1.29e-19	38674	2881	35793
Volume	VAT	25918	Volume of grey matter in X Cerebellum (left)	Physical Measures	Brain MRI	LINEAR	-0.112	-0.136	-0.0876	1.45e-19	19587	NA	NA
Volume	VAT	22673	Minimum carotid IMT (intima-medial thickness) at 150 degrees	Physical Measures	Carotid ultrasound	LINEAR	-0.104	-0.126	-0.0811	2.87e-19	22816	NA	NA
Volume	VAT	21021	Pulse wave Arterial Stiffness index	Physical Measures	Arterial stiffness	LINEAR	0.136	0.106	0.166	6.83e-19	12792	NA	NA
Volume	VAT	25843	Volume of grey matter in Precuneous Cortex (right)	Physical Measures	Brain MRI	LINEAR	-0.106	-0.13	-0.0825	1.18e-18	19587	NA	NA
Volume	VAT	1110	Length of mobile phone use	Lifestyle and History	Lifestyle and environment	ORDERED-LOGISTIC	0.155	0.121	0.19	1.24e-18	38470	NA	NA
Volume	VAT	6179#100	Mineral and other dietary supplements	Medical history	Health and medical history	LOGISTIC-BINARY	0.174	0.135	0.213	1.69e-18	38116	21649	16467
Volume	VAT	22038	MET minutes per week for moderate activity	Lifestyle and History	Lifestyle and environment	LINEAR	-0.0881	-0.108	-0.0684	1.83e-18	32885	NA	NA
Volume	VAT	25025	Volume of brain stem + 4th ventricle	Physical Measures	Brain MRI	LINEAR	-0.102	-0.125	-0.0789	3.94e-18	19577	NA	NA
Volume	VAT	6033	Maximum heart rate during fitness test	Physical Measures	ECG during exercise	LINEAR	0.198	0.153	0.242	3.96e-18	6160	NA	NA
Volume	VAT	2080	Frequency of tiredness / lethargy in last 2 weeks	Lifestyle and History	Psychosocial factors	ORDERED-LOGISTIC	0.162	0.125	0.198	4.44e-18	37990	NA	NA
Volume	VAT	22034	Summed minutes activity	Lifestyle and History	Lifestyle and environment	LINEAR	-0.0874	-0.107	-0.0676	4.76e-18	32885	NA	NA
Volume	VAT	20003#1141146234	Treatment/medication code: atorvastatin	Medical history	Medications	LOGISTIC-BINARY	0.489	0.378	0.599	5.07e-18	38674	806	37868
Volume	VAT	1329	Oily fish intake	Lifestyle and History	Lifestyle and environment	ORDERED-LOGISTIC	-0.15	-0.184	-0.116	6.5e-18	38600	NA	NA
Volume	VAT	25909	Volume of grey matter in VIIIa Cerebellum (left)	Physical Measures	Brain MRI	LINEAR	-0.107	-0.132	-0.0829	7.79e-18	19587	NA	NA
Volume	VAT	25902	Volume of grey matter in Crus I Cerebellum (right)	Physical Measures	Brain MRI	LINEAR	-0.104	-0.128	-0.0806	9.16e-18	19587	NA	NA
Volume	VAT	30840	Total bilirubin	Biological samples	Liver	LINEAR	-0.0786	-0.0966	-0.0605	1.35e-17	36016	NA	NA
Volume	VAT	914	Duration of vigorous activity	Lifestyle and History	Lifestyle and environment	LINEAR	-0.104	-0.128	-0.0802	1.35e-17	23575	NA	NA
Volume	VAT	21040	Satisfaction with bowel habits	Online follow-up	Digestive health	ORDERED-LOGISTIC	0.16	0.124	0.197	1.6e-17	30044	NA	NA
Volume	VAT	845	Age completed full time education	Lifestyle and History	Sociodemographics	ORDERED-LOGISTIC	-0.208	-0.255	-0.16	1.73e-17	20501	NA	NA
Volume	VAT	30740	Glucose	Biological samples	Diabetes	LINEAR	0.0846	0.065	0.104	2.61e-17	32992	NA	NA
Volume	VAT	25900	Volume of grey matter in Crus I Cerebellum (left)	Physical Measures	Brain MRI	LINEAR	-0.105	-0.129	-0.0805	2.94e-17	19587	NA	NA
Volume	VAT	25903	Volume of grey matter in Crus II Cerebellum (left)	Physical Measures	Brain MRI	LINEAR	-0.106	-0.131	-0.0816	3.72e-17	19587	NA	NA
Volume	VAT	1190	Nap during day	Lifestyle and History	Lifestyle and environment	ORDERED-LOGISTIC	0.16	0.123	0.198	4.82e-17	38661	NA	NA
Volume	VAT	25857	"Volume of grey matter in Temporal Fusiform Cortex, posterior division (right)"	Physical Measures	Brain MRI	LINEAR	-0.0997	-0.123	-0.0763	7.23e-17	19587	NA	NA
Volume	VAT	1289	Cooked vegetable intake	Lifestyle and History	Lifestyle and environment	ORDERED-LOGISTIC	-0.15	-0.186	-0.115	9.65e-17	37779	NA	NA
Volume	VAT	20003#1140860806	Treatment/medication code: ramipril	Medical history	Medications	LOGISTIC-BINARY	0.405	0.31	0.501	1.02e-16	38674	1074	37600
Volume	VAT	1697	Comparative height size at age 10	Lifestyle and History	Early life factors	ORDERED-LOGISTIC	-0.157	-0.194	-0.12	1.03e-16	38263	NA	NA
Volume	VAT	6154#1	"Medication for pain relief, constipation, heartburn": Aspirin	Medical history	Health and medical history	LOGISTIC-BINARY	0.237	0.181	0.294	1.09e-16	37911	4157	33754
Volume	VAT	20003#1140868226	Treatment/medication code: aspirin	Medical history	Medications	LOGISTIC-BINARY	0.243	0.185	0.3	1.21e-16	38674	3889	34785
Volume	VAT	20416	Freq 6+ units alcohol	Online follow-up	Alcohol use	ORDERED-LOGISTIC	0.182	0.139	0.225	1.48e-16	24883	NA	NA
Volume	VAT	25897	Volume of grey matter in VI Cerebellum (left)	Physical Measures	Brain MRI	LINEAR	-0.101	-0.125	-0.0769	1.65e-16	19587	NA	NA
Volume	VAT	25862	Volume of grey matter in Frontal Operculum Cortex (left)	Physical Measures	Brain MRI	LINEAR	-0.102	-0.127	-0.0779	1.88e-16	19587	NA	NA
Volume	VAT	1299	Salad / raw vegetable intake	Lifestyle and History	Lifestyle and environment	ORDERED-LOGISTIC	-0.158	-0.195	-0.12	2.41e-16	36384	NA	NA
Volume	VAT	25766	90th percentile of z-statistic (in group-defined mask) for faces-shapes contrast	Physical Measures	Brain MRI	LINEAR	-0.113	-0.14	-0.0862	3.11e-16	17232	NA	NA
Volume	VAT	30600	Albumin	Biological samples	Liver	LINEAR	0.0804	0.0611	0.0998	3.58e-16	33034	NA	NA
Volume	VAT	25015	Volume of putamen (left)	Physical Measures	Brain MRI	LINEAR	-0.0926	-0.115	-0.0703	4.29e-16	19577	NA	NA
Volume	VAT	2149	Lifetime number of sexual partners	Lifestyle and History	Lifestyle and environment	ORDERED-LOGISTIC	0.154	0.117	0.191	5.78e-16	33786	NA	NA
Volume	VAT	25910	Volume of grey matter in Vermis VIIIa Cerebellum	Physical Measures	Brain MRI	LINEAR	-0.103	-0.128	-0.0783	6.54e-16	19587	NA	NA
Volume	VAT	25871	Volume of grey matter in Heschl's Gyrus (includes H1 and H2) (right)	Physical Measures	Brain MRI	LINEAR	-0.0963	-0.12	-0.0728	9.43e-16	19587	NA	NA
Volume	VAT	25786	Volume of grey matter in Superior Frontal Gyrus (left)	Physical Measures	Brain MRI	LINEAR	-0.101	-0.126	-0.0767	1.05e-15	19587	NA	NA
Volume	VAT	20403	Alchohol/day	Online follow-up	Alcohol use	ORDERED-LOGISTIC	0.179	0.135	0.222	1.1e-15	24847	NA	NA
Volume	VAT	25824	"Volume of grey matter in Lateral Occipital Cortex, superior division (left)"	Physical Measures	Brain MRI	LINEAR	-0.1	-0.125	-0.0757	1.41e-15	19587	NA	NA
Volume	VAT	4548	Health satisfaction	Lifestyle and History	Psychosocial factors	ORDERED-LOGISTIC	0.25	0.189	0.311	1.49e-15	12912	NA	NA
Volume	VAT	1249	Past tobacco smoking	Lifestyle and History	Lifestyle and environment	ORDERED-LOGISTIC	-0.142	-0.177	-0.107	1.77e-15	37033	NA	NA
Volume	VAT	21029	More frequent bowel movements when abdominal discomfort/pain started	Online follow-up	Digestive health	ORDERED-LOGISTIC	0.224	0.169	0.279	1.98e-15	15728	NA	NA
Volume	VAT	25835	Volume of grey matter in Subcallosal Cortex (right)	Physical Measures	Brain MRI	LINEAR	-0.0941	-0.117	-0.0709	2.17e-15	19587	NA	NA
Volume	VAT	25017	Volume of pallidum (left)	Physical Measures	Brain MRI	LINEAR	-0.0982	-0.122	-0.0739	2.17e-15	19577	NA	NA
Volume	VAT	4717	Shortness of breath walking on level ground	Medical history	Health and medical history	LOGISTIC-BINARY	0.542	0.407	0.676	2.47e-15	12783	745	12038
Volume	VAT	25781	Total volume of white matter hyperintensities (from T1 and T2_FLAIR images)	Physical Measures	Brain MRI	LINEAR	0.0925	0.0696	0.115	2.74e-15	18540	NA	NA
Volume	VAT	1210	Snoring	Lifestyle and History	Lifestyle and environment	LOGISTIC-BINARY	-0.162	-0.202	-0.122	2.85e-15	36512	23229	13283
Volume	VAT	6164#5	Types of physical activity in last 4 weeks: Heavy DIY (eg: weeding, lawn mowing, carpentry, digging)	Lifestyle and History	Lifestyle and environment	LOGISTIC-BINARY	-0.155	-0.193	-0.116	3.01e-15	38127	18548	19579
Volume	VAT	21031	Stools looser when abdominal discomfort/pain started	Online follow-up	Digestive health	ORDERED-LOGISTIC	0.217	0.163	0.271	3.41e-15	15720	NA	NA
Volume	VAT	25890	Volume of grey matter in Ventral Striatum (left)	Physical Measures	Brain MRI	LINEAR	-0.0939	-0.117	-0.0704	4.4e-15	19587	NA	NA
Volume	VAT	30660	Direct bilirubin	Biological samples	Liver	LINEAR	-0.0772	-0.0966	-0.0578	6.45e-15	31320	NA	NA
Volume	VAT	25867	Volume of grey matter in Parietal Operculum Cortex (right)	Physical Measures	Brain MRI	LINEAR	-0.0954	-0.119	-0.0714	6.79e-15	19587	NA	NA
Volume	VAT	30680	Calcium	Biological samples	Bone and joint	LINEAR	0.0785	0.0587	0.0983	7.62e-15	33034	NA	NA
Volume	VAT	22506-114	Tobacco smoking	Online follow-up	Medical information	MULTINOMIAL-LOGISTIC	NA	NA	NA	1.08e-14	NA	NA	NA
Volume	VAT	25878	Volume of grey matter in Thalamus (left)	Physical Measures	Brain MRI	LINEAR	-0.0977	-0.122	-0.0729	1.13e-14	19587	NA	NA
Volume	VAT	25833	Volume of grey matter in Juxtapositional Lobule Cortex (formerly Supplementary Motor Cortex) (right)	Physical Measures	Brain MRI	LINEAR	-0.0988	-0.124	-0.0737	1.41e-14	19587	NA	NA
Volume	VAT	25050	Median z-statistic (in group-defined mask) for faces-shapes contrast	Physical Measures	Brain MRI	LINEAR	-0.107	-0.134	-0.0794	1.79e-14	17232	NA	NA
Volume	VAT	25842	Volume of grey matter in Precuneous Cortex (left)	Physical Measures	Brain MRI	LINEAR	-0.0921	-0.116	-0.0685	2.19e-14	19587	NA	NA
Volume	VAT	25819	"Volume of grey matter in Supramarginal Gyrus, anterior division (right)"	Physical Measures	Brain MRI	LINEAR	-0.0998	-0.125	-0.0741	2.64e-14	19587	NA	NA
Volume	VAT	25809	"Volume of grey matter in Inferior Temporal Gyrus, anterior division (right)"	Physical Measures	Brain MRI	LINEAR	-0.0964	-0.121	-0.0715	3.05e-14	19587	NA	NA
Volume	VAT	25810	"Volume of grey matter in Inferior Temporal Gyrus, posterior division (left)"	Physical Measures	Brain MRI	LINEAR	-0.0951	-0.12	-0.0705	3.54e-14	19587	NA	NA
Volume	VAT	100017	Magnesium	Online follow-up	Estimated nutrients yesterday	LINEAR	-0.181	-0.228	-0.134	3.69e-14	5729	NA	NA
Volume	VAT	20003#1140879802	Treatment/medication code: amlodipine	Medical history	Medications	LOGISTIC-BINARY	0.383	0.284	0.483	4.35e-14	38674	1027	37647
Volume	VAT	1369	Beef intake	Lifestyle and History	Lifestyle and environment	ORDERED-LOGISTIC	0.132	0.0975	0.166	4.96e-14	38613	NA	NA
Volume	VAT	738	Average total household income before tax	Lifestyle and History	Sociodemographics	ORDERED-LOGISTIC	-0.133	-0.168	-0.0987	5.31e-14	34927	NA	NA
Volume	VAT	25023	Volume of accumbens (left)	Physical Measures	Brain MRI	LINEAR	-0.0921	-0.116	-0.068	6.93e-14	19577	NA	NA
Volume	VAT	22616#1	Breathing problems during period of job: Yes	Online follow-up	Employment history	LOGISTIC-BINARY	0.359	0.265	0.453	7.58e-14	21105	1446	19659
Volume	VAT	22670	Minimum carotid IMT (intima-medial thickness) at 120 degrees	Physical Measures	Carotid ultrasound	LINEAR	-0.0868	-0.11	-0.064	8.64e-14	22733	NA	NA
Volume	VAT	25840	"Volume of grey matter in Cingulate Gyrus, posterior division (left)"	Physical Measures	Brain MRI	LINEAR	-0.0867	-0.109	-0.0639	8.83e-14	19587	NA	NA
Volume	VAT	100009	Englyst dietary fibre	Online follow-up	Estimated nutrients yesterday	LINEAR	-0.181	-0.228	-0.133	1.12e-13	5729	NA	NA
Volume	VAT	20003#1140865634	Treatment/medication code: omeprazole	Medical history	Medications	LOGISTIC-BINARY	0.344	0.253	0.435	1.13e-13	38674	1422	37252
Volume	VAT	6154#3	Paracetamol	Medical history	Health and medical history	LOGISTIC-BINARY	0.189	0.139	0.239	1.18e-13	37911	7014	30897
Volume	VAT	22502	Cough on most days	Online follow-up	Medical information	LOGISTIC-BINARY	0.272	0.2	0.343	1.21e-13	21525	2710	18815
Volume	VAT	20191	Fluid intelligence score	Online follow-up	Fluid intelligence	ORDERED-LOGISTIC	-0.169	-0.213	-0.124	1.37e-13	20550	NA	NA
Volume	VAT	1508-2	Coffee type	Lifestyle and History	Lifestyle and environment	MULTINOMIAL-LOGISTIC	NA	NA	NA	1.91e-13	NA	NA	NA
Volume	VAT	25805	"Volume of grey matter in Middle Temporal Gyrus, posterior division (right)"	Physical Measures	Brain MRI	LINEAR	-0.0923	-0.117	-0.0677	2.2e-13	19587	NA	NA
Volume	VAT	20408	Frequency of memory loss due to drinking alcohol in last year	Online follow-up	Alcohol use	ORDERED-LOGISTIC	0.311	0.228	0.394	2.37e-13	15732	NA	NA
Volume	VAT	6154#5	"Medication for pain relief, constipation, heartburn": Omeprazole (e.g. Zanprol)	Medical history	Health and medical history	LOGISTIC-BINARY	0.326	0.238	0.413	3.02e-13	37911	1566	36345
Volume	VAT	21036	Severity of current abdominal pain	Online follow-up	Digestive health	ORDERED-LOGISTIC	0.27	0.197	0.342	4.2e-13	8336	NA	NA
Volume	VAT	6145#6	"Illness, injury, bereavement, stress in last 2 years": Financial difficulties	Lifestyle and History	Psychosocial factors	LOGISTIC-BINARY	0.23	0.168	0.292	4.24e-13	38078	3581	34497
Volume	VAT	25788	Volume of grey matter in Middle Frontal Gyrus (left)	Physical Measures	Brain MRI	LINEAR	-0.0912	-0.116	-0.0665	4.7e-13	19587	NA	NA
Volume	VAT	1200	Sleeplessness / insomnia	Lifestyle and History	Lifestyle and environment	ORDERED-LOGISTIC	0.128	0.0935	0.163	5.35e-13	38649	NA	NA
Volume	VAT	1588	Average weekly beer plus cider intake	Lifestyle and History	Lifestyle and environment	ORDERED-LOGISTIC	0.156	0.113	0.198	6.48e-13	29425	NA	NA
Volume	VAT	6032	Maximum workload during fitness test	Physical Measures	ECG during exercise	LINEAR	-0.119	-0.151	-0.0863	7.83e-13	6160	NA	NA
Volume	VAT	21034	Frequency of loose/mushy/watery stools in the last 3 months	Online follow-up	Digestive health	ORDERED-LOGISTIC	0.145	0.105	0.184	8.62e-13	30149	NA	NA
Volume	VAT	20519	Recent feelings of tiredness or low energy	Online follow-up	Depression	ORDERED-LOGISTIC	0.161	0.117	0.205	8.74e-13	26756	NA	NA
Volume	VAT	1558	Alcohol freq.	Lifestyle and History	Lifestyle and environment	ORDERED-LOGISTIC	-0.12	-0.153	-0.0871	9.46e-13	38661	NA	NA
Volume	VAT	1408	Cheese intake	Lifestyle and History	Lifestyle and environment	ORDERED-LOGISTIC	-0.126	-0.16	-0.091	1.01e-12	38018	NA	NA
Volume	VAT	25808	"Volume of grey matter in Inferior Temporal Gyrus, anterior division (left)"	Physical Measures	Brain MRI	LINEAR	-0.0904	-0.115	-0.0655	1.09e-12	19587	NA	NA
Volume	VAT	1488	Tea intake	Lifestyle and History	Lifestyle and environment	LINEAR	-0.0679	-0.0866	-0.0492	1.11e-12	37255	NA	NA
Volume	VAT	30150	Eosinophill count	Biological samples	White blood cells	ORDERED-LOGISTIC	0.129	0.0936	0.165	1.11e-12	36762	NA	NA
Volume	VAT	25821	"Volume of grey matter in Supramarginal Gyrus, posterior division (right)"	Physical Measures	Brain MRI	LINEAR	-0.0906	-0.116	-0.0655	1.34e-12	19587	NA	NA
Volume	VAT	100800	Muesli intake	Online follow-up	Cereal yesterday	ORDERED-LOGISTIC	-0.481	-0.613	-0.348	1.35e-12	5726	NA	NA
Volume	VAT	25868	Volume of grey matter in Planum Polare (left)	Physical Measures	Brain MRI	LINEAR	-0.0867	-0.111	-0.0627	1.7e-12	19587	NA	NA
Volume	VAT	25792	"Volume of grey matter in Inferior Frontal Gyrus, pars opercularis (left)"	Physical Measures	Brain MRI	LINEAR	-0.0902	-0.115	-0.0652	1.75e-12	19587	NA	NA
Volume	VAT	100880	Dried fruit added to cereal	Online follow-up	Cereal yesterday	ORDERED-LOGISTIC	-0.385	-0.493	-0.277	2.81e-12	5726	NA	NA
Volume	VAT	6038	Number of trend entries	Physical Measures	ECG during exercise	LINEAR	-0.143	-0.184	-0.103	3.38e-12	6160	NA	NA
Volume	VAT	22507	Age of stopping smoking	Online follow-up	Medical information	LINEAR	0.141	0.101	0.181	3.6e-12	7369	NA	NA
Volume	VAT	20512	Recent feelings of foreboding	Online follow-up	Anxiety	ORDERED-LOGISTIC	0.223	0.16	0.286	3.95e-12	26687	NA	NA
Volume	VAT	22504	Bring up phlegm/sputum/mucus on most days	Online follow-up	Medical information	LOGISTIC-BINARY	0.298	0.214	0.383	4.09e-12	21525	1738	19787
Volume	VAT	25859	Volume of grey matter in Temporal Occipital Fusiform Cortex (right)	Physical Measures	Brain MRI	LINEAR	-0.0846	-0.109	-0.0606	4.82e-12	19587	NA	NA
Volume	VAT	25914	Volume of grey matter in VIIIb Cerebellum (right)	Physical Measures	Brain MRI	LINEAR	-0.0863	-0.111	-0.0618	5.34e-12	19587	NA	NA
Volume	VAT	6159#5	Pain type(s) experienced in last month: Stomach or abdominal pain	Medical history	Health and medical history	LOGISTIC-BINARY	0.247	0.177	0.318	5.46e-12	38646	2919	35727
Volume	VAT	20414	Freq alcohol	Online follow-up	Alcohol use	ORDERED-LOGISTIC	0.142	0.101	0.182	6.36e-12	26770	NA	NA
Volume	VAT	22127	Asthma	Online follow-up	Medical information	LOGISTIC-BINARY	0.259	0.185	0.334	6.7e-12	21525	2695	18830
Volume	VAT	1618	Alcohol usually taken with meals	Lifestyle and History	Lifestyle and environment	LOGISTIC-BINARY	-0.203	-0.261	-0.145	6.93e-12	20137	14555	5582
Volume	VAT	25798	"Volume of grey matter in Superior Temporal Gyrus, anterior division (left)"	Physical Measures	Brain MRI	LINEAR	-0.0865	-0.111	-0.0618	7.25e-12	19587	NA	NA
Volume	VAT	2986	Started insulin within one year diagnosis of diabetes	Medical history	Health and medical history	LOGISTIC-BINARY	-1.33	-1.72	-0.956	7.53e-12	952	104	848
Volume	VAT	6160#4	Leisure/social activities: Adult education class	Lifestyle and History	Psychosocial factors	LOGISTIC-BINARY	-0.263	-0.338	-0.188	8.22e-12	38620	3107	35513
Volume	VAT	1090	Time spent driving	Lifestyle and History	Lifestyle and environment	ORDERED-LOGISTIC	0.149	0.106	0.191	9.27e-12	24607	NA	NA
Volume	VAT	25831	Volume of grey matter in Frontal Medial Cortex (right)	Physical Measures	Brain MRI	LINEAR	-0.0858	-0.111	-0.0611	1.01e-11	19587	NA	NA
Volume	VAT	22606#2	Workplace very noisy	Online follow-up	Employment history	LOGISTIC-BINARY	0.217	0.154	0.279	1.06e-11	21037	3880	17157
Volume	VAT	104400	Fruit consumers	Online follow-up	Fruit/vegetables yesterday	LOGISTIC-BINARY	-0.441	-0.568	-0.314	1.08e-11	5726	4797	929
Volume	VAT	22619#0	Breathing problems responsible for leaving job: No	Online follow-up	Employment history	LOGISTIC-BINARY	0.36	0.256	0.463	1.16e-11	21105	1156	19949
Volume	VAT	6160#3	Leisure/social activities: Religious group	Lifestyle and History	Psychosocial factors	LOGISTIC-BINARY	-0.186	-0.239	-0.132	1.26e-11	38620	5954	32666
Volume	VAT	25014	Volume of caudate (right)	Physical Measures	Brain MRI	LINEAR	-0.0843	-0.109	-0.0598	1.43e-11	19577	NA	NA
Volume	VAT	25806	"Volume of grey matter in Middle Temporal Gyrus, temporooccipital part (left)"	Physical Measures	Brain MRI	LINEAR	-0.0883	-0.114	-0.0626	1.64e-11	19587	NA	NA
Volume	VAT	2897	Age stopped smoking	Lifestyle and History	Lifestyle and environment	LINEAR	0.122	0.0864	0.157	1.66e-11	8671	NA	NA
Volume	VAT	12682	Cardiac output during PWA	Physical Measures	Heart MRI	LINEAR	0.063	0.0447	0.0813	1.72e-11	33105	NA	NA
Volume	VAT	21061	Degree bothered by trouble sleeping in the last 3 months	Online follow-up	Digestive health	ORDERED-LOGISTIC	0.138	0.0977	0.178	1.76e-11	30158	NA	NA
Volume	VAT	25801	"Volume of grey matter in Superior Temporal Gyrus, posterior division (right)"	Physical Measures	Brain MRI	LINEAR	-0.0835	-0.108	-0.0591	2.02e-11	19587	NA	NA
Volume	VAT	25021	Volume of amygdala (left)	Physical Measures	Brain MRI	LINEAR	-0.086	-0.111	-0.0609	2.05e-11	19577	NA	NA
Volume	VAT	20004#1355	Operation code: bilateral oophorectomy	Medical history	Operations	LOGISTIC-BINARY	0.45	0.318	0.581	2.24e-11	38674	1315	37359
Volume	VAT	2060	Frequency of unenthusiasm / disinterest in last 2 weeks	Lifestyle and History	Psychosocial factors	ORDERED-LOGISTIC	0.164	0.116	0.212	2.29e-11	37888	NA	NA
Volume	VAT	20405-0	"Ever had known person concerned about, or recommend reduction of, alcohol consumption"	Online follow-up	Alcohol use	MULTINOMIAL-LOGISTIC	NA	NA	NA	2.38e-11	NA	NA	NA
Volume	VAT	25863	Volume of grey matter in Frontal Operculum Cortex (right)	Physical Measures	Brain MRI	LINEAR	-0.0832	-0.108	-0.0587	3.06e-11	19587	NA	NA
Volume	VAT	25016	Volume of putamen (right)	Physical Measures	Brain MRI	LINEAR	-0.0754	-0.0976	-0.0531	3.24e-11	19577	NA	NA
Volume	VAT	25020	Volume of hippocampus (right)	Physical Measures	Brain MRI	LINEAR	-0.0831	-0.108	-0.0586	3.41e-11	19577	NA	NA
Volume	VAT	25800	"Volume of grey matter in Superior Temporal Gyrus, posterior division (left)"	Physical Measures	Brain MRI	LINEAR	-0.0832	-0.108	-0.0586	3.55e-11	19587	NA	NA
Volume	VAT	25013	Volume of caudate (left)	Physical Measures	Brain MRI	LINEAR	-0.0822	-0.107	-0.0579	3.69e-11	19577	NA	NA
Volume	VAT	25038	Median T2star in accumbens (left)	Physical Measures	Brain MRI	LINEAR	-0.0917	-0.119	-0.0645	4.02e-11	18120	NA	NA
Volume	VAT	12338	P duration	Physical Measures	ECG at rest	LINEAR	-0.0674	-0.0874	-0.0474	4.33e-11	31864	NA	NA
Volume	VAT	25879	Volume of grey matter in Thalamus (right)	Physical Measures	Brain MRI	LINEAR	-0.0816	-0.106	-0.0573	4.86e-11	19587	NA	NA
Volume	VAT	25811	"Volume of grey matter in Inferior Temporal Gyrus, posterior division (right)"	Physical Measures	Brain MRI	LINEAR	-0.0828	-0.107	-0.0581	5.01e-11	19587	NA	NA
Volume	VAT	20004#1455	Operation code: cholecystectomy/gall bladder removal	Medical history	Operations	LOGISTIC-BINARY	0.38	0.266	0.494	6.11e-11	38674	983	37691
Volume	VAT	25845	Volume of grey matter in Cuneal Cortex (right)	Physical Measures	Brain MRI	LINEAR	-0.0816	-0.106	-0.057	7.72e-11	19587	NA	NA
Volume	VAT	5984	"ECG, load"	Physical Measures	ECG during exercise	LINEAR	-0.105	-0.137	-0.0734	8.01e-11	6139	NA	NA
Volume	VAT	25858	Volume of grey matter in Temporal Occipital Fusiform Cortex (left)	Physical Measures	Brain MRI	LINEAR	-0.0816	-0.106	-0.057	8.15e-11	19587	NA	NA
Volume	VAT	12702	Cardiac index during PWA	Physical Measures	Heart MRI	LINEAR	0.0566	0.0395	0.0737	8.32e-11	31684	NA	NA
Volume	VAT	6138#6	Qualifications: Other professional qualifications eg: nursing, teaching	Lifestyle and History	Sociodemographics	LOGISTIC-BINARY	-0.129	-0.168	-0.0902	8.42e-11	38035	14136	23899
Volume	VAT	25870	Volume of grey matter in Heschl's Gyrus (includes H1 and H2) (left)	Physical Measures	Brain MRI	LINEAR	-0.0778	-0.101	-0.0541	1.18e-10	19587	NA	NA
Volume	VAT	25818	"Volume of grey matter in Supramarginal Gyrus, anterior division (left)"	Physical Measures	Brain MRI	LINEAR	-0.0839	-0.109	-0.0584	1.19e-10	19587	NA	NA
Volume	VAT	100005	Carbohydrate	Online follow-up	Estimated nutrients yesterday	LINEAR	-0.153	-0.2	-0.106	1.47e-10	5729	NA	NA
Volume	VAT	25869	Volume of grey matter in Planum Polare (right)	Physical Measures	Brain MRI	LINEAR	-0.0772	-0.101	-0.0535	1.65e-10	19587	NA	NA
Volume	VAT	21035	Currently (in last 3 months) suffer from abdominal pain	Online follow-up	Digestive health	LOGISTIC-BINARY	0.16	0.111	0.209	1.67e-10	30115	8361	21754
Volume	VAT	5993	"ECG, number of stages in a phase"	Physical Measures	ECG during exercise	ORDERED-LOGISTIC	-0.344	-0.449	-0.239	1.69e-10	6160	NA	NA
Volume	VAT	22618#0	Breathing problems improved/stopped away from workplace or on holiday: No	Online follow-up	Employment history	LOGISTIC-BINARY	0.372	0.258	0.487	1.86e-10	21105	971	20134
Volume	VAT	22674	Mean carotid IMT (intima-medial thickness) at 150 degrees	Physical Measures	Carotid ultrasound	LINEAR	-0.0719	-0.0941	-0.0497	2.1e-10	22816	NA	NA
Volume	VAT	25896	Volume of grey matter in V Cerebellum (right)	Physical Measures	Brain MRI	LINEAR	-0.0789	-0.103	-0.0544	2.56e-10	19587	NA	NA
Volume	VAT	20517	"Trouble falling or staying asleep, or sleeping too much"	Online follow-up	Depression	ORDERED-LOGISTIC	0.141	0.0973	0.185	2.67e-10	26767	NA	NA
Volume	VAT	25860	Volume of grey matter in Occipital Fusiform Gyrus (left)	Physical Measures	Brain MRI	LINEAR	-0.0779	-0.102	-0.0537	2.8e-10	19587	NA	NA
Volume	VAT	21044	Average number of times bowels opened per day	Online follow-up	Digestive health	ORDERED-LOGISTIC	0.141	0.0968	0.184	3.05e-10	29982	NA	NA
Volume	VAT	22676	Minimum carotid IMT (intima-medial thickness) at 210 degrees	Physical Measures	Carotid ultrasound	LINEAR	-0.0734	-0.0963	-0.0505	3.31e-10	22743	NA	NA
Volume	VAT	104450	Apple intake	Online follow-up	Fruit/vegetables yesterday	ORDERED-LOGISTIC	-0.318	-0.417	-0.219	3.55e-10	5720	NA	NA
Volume	VAT	25807	"Volume of grey matter in Middle Temporal Gyrus, temporooccipital part (right)"	Physical Measures	Brain MRI	LINEAR	-0.0784	-0.103	-0.0539	3.94e-10	19587	NA	NA
Volume	VAT	6160#100	Leisure/social activities	Lifestyle and History	Psychosocial factors	LOGISTIC-BINARY	0.131	0.09	0.172	4.23e-10	38620	10661	27959
Volume	VAT	6146#100	Attendance/disability/mobility allowance	Lifestyle and History	Sociodemographics	LOGISTIC-BINARY	-0.447	-0.587	-0.306	4.62e-10	38549	37977	572
Volume	VAT	12684	End systolic pressure index during PWA	Physical Measures	Heart MRI	LINEAR	0.0623	0.0427	0.0819	4.75e-10	33073	NA	NA
Volume	VAT	25832	Volume of grey matter in Juxtapositional Lobule Cortex (formerly Supplementary Motor Cortex) (left)	Physical Measures	Brain MRI	LINEAR	-0.0799	-0.105	-0.0547	5.37e-10	19587	NA	NA
Volume	VAT	25883	Volume of grey matter in Putamen (right)	Physical Measures	Brain MRI	LINEAR	-0.0803	-0.106	-0.0549	6.2e-10	19587	NA	NA
Volume	VAT	100008	Total sugars	Online follow-up	Estimated nutrients yesterday	LINEAR	-0.15	-0.197	-0.102	6.38e-10	5729	NA	NA
Volume	VAT	23124	Arm fat mass (left)	Physical Measures	Impedance	LINEAR	0.031	0.0212	0.0408	6.49e-10	38181	NA	NA
Volume	VAT	1960	Fed-up feelings	Lifestyle and History	Psychosocial factors	LOGISTIC-BINARY	0.125	0.0852	0.164	6.49e-10	38087	13531	24556
Volume	VAT	20546#3	Substances taken for depression: Medication prescribed to you (for at least two weeks)	Online follow-up	Depression	LOGISTIC-BINARY	0.172	0.118	0.227	6.58e-10	26677	6225	20452
Volume	VAT	20003#1140874744	Glicazide	Medical history	Medications	LOGISTIC-BINARY	0.692	0.471	0.912	7.55e-10	38674	168	38506
Volume	VAT	21059	Degree bothered by nausea in the last 3 months	Online follow-up	Digestive health	ORDERED-LOGISTIC	0.202	0.137	0.266	8.04e-10	30158	NA	NA
Volume	VAT	21055	Degree bothered by feeling heart pound/race in the last 3 months	Online follow-up	Digestive health	ORDERED-LOGISTIC	0.148	0.101	0.195	9.32e-10	30162	NA	NA
Volume	VAT	1787	Maternal smoking around birth	Lifestyle and History	Early life factors	LOGISTIC-BINARY	0.134	0.0907	0.176	9.62e-10	34084	10306	23778
Volume	VAT	21062	Ever been offered/sought treatment for anxiety	Online follow-up	Digestive health	LOGISTIC-BINARY	0.164	0.111	0.217	9.87e-10	30101	6510	23591
Volume	VAT	25872	Volume of grey matter in Planum Temporale (left)	Physical Measures	Brain MRI	LINEAR	-0.0733	-0.0968	-0.0497	1.1e-09	19587	NA	NA
Volume	VAT	20003#1141188442	Treatment/medication code: glucosamine product	Medical history	Medications	LOGISTIC-BINARY	-0.224	-0.296	-0.152	1.12e-09	38674	3003	35671
Volume	VAT	1180	Morning/evening person (chronotype)	Lifestyle and History	Lifestyle and environment	ORDERED-LOGISTIC	0.111	0.0755	0.147	1.26e-09	34135	NA	NA
Volume	VAT	21025	Frequency of discomfort/pain in abdomen in last 3 months	Online follow-up	Digestive health	ORDERED-LOGISTIC	0.122	0.0828	0.162	1.27e-09	30146	NA	NA
Volume	VAT	6159#3	Pain type(s) experienced in last month: Neck or shoulder pain	Medical history	Health and medical history	LOGISTIC-BINARY	0.14	0.0948	0.185	1.29e-09	38646	8047	30599
Volume	VAT	25841	"Volume of grey matter in Cingulate Gyrus, posterior division (right)"	Physical Measures	Brain MRI	LINEAR	-0.0712	-0.0942	-0.0482	1.31e-09	19587	NA	NA
Volume	VAT	25799	"Volume of grey matter in Superior Temporal Gyrus, anterior division (right)"	Physical Measures	Brain MRI	LINEAR	-0.0768	-0.102	-0.052	1.36e-09	19587	NA	NA
Volume	VAT	25790	"Volume of grey matter in Inferior Frontal Gyrus, pars triangularis (left)"	Physical Measures	Brain MRI	LINEAR	-0.0783	-0.104	-0.0529	1.49e-09	19587	NA	NA
Volume	VAT	25825	"Volume of grey matter in Lateral Occipital Cortex, superior division (right)"	Physical Measures	Brain MRI	LINEAR	-0.0744	-0.0986	-0.0503	1.55e-09	19587	NA	NA
Volume	VAT	25853	Volume of grey matter in Lingual Gyrus (right)	Physical Measures	Brain MRI	LINEAR	-0.0695	-0.0921	-0.047	1.56e-09	19587	NA	NA
Volume	VAT	2306	Weight change compared with 1 year ago	Medical history	Health and medical history	ORDERED-LOGISTIC	0.114	0.0769	0.151	1.62e-09	38233	NA	NA
Volume	VAT	25913	Volume of grey matter in Vermis VIIIb Cerebellum	Physical Measures	Brain MRI	LINEAR	-0.0774	-0.103	-0.0521	1.93e-09	19587	NA	NA
Volume	VAT	25895	Volume of grey matter in V Cerebellum (left)	Physical Measures	Brain MRI	LINEAR	-0.075	-0.0995	-0.0504	2.12e-09	19587	NA	NA
Volume	VAT	20003#1140866738	Treatment/medication code: atenolol	Medical history	Medications	LOGISTIC-BINARY	0.325	0.218	0.431	2.24e-09	38674	885	37789
Volume	VAT	25866	Volume of grey matter in Parietal Operculum Cortex (left)	Physical Measures	Brain MRI	LINEAR	-0.0735	-0.0976	-0.0494	2.34e-09	19587	NA	NA
Volume	VAT	6154#4	"Medication for pain relief, constipation, heartburn": Ranitidine (e.g. Zantac)	Medical history	Health and medical history	LOGISTIC-BINARY	0.43	0.288	0.571	2.38e-09	37911	562	37349
Volume	VAT	6139#3	Gas or solid-fuel cooking/heating: An open solid fuel fire that you use regularly in winter time	Lifestyle and History	Sociodemographics	LOGISTIC-BINARY	-0.194	-0.258	-0.13	2.62e-09	38104	3968	34136
Volume	VAT	20549#3	Substances taken for anxiety: Medication prescribed to you (for at least two weeks)	Online follow-up	Anxiety	LOGISTIC-BINARY	0.211	0.141	0.28	2.7e-09	26702	3255	23447
Volume	VAT	1990	Tense / 'highly strung'	Lifestyle and History	Psychosocial factors	LOGISTIC-BINARY	0.163	0.109	0.217	2.95e-09	37770	5615	32155
Volume	VAT	25024	Volume of accumbens (right)	Physical Measures	Brain MRI	LINEAR	-0.0719	-0.0958	-0.0481	3.17e-09	19577	NA	NA
Volume	VAT	2644	"Light smokers, at least 100 smokes in lifetime"	Lifestyle and History	Lifestyle and environment	LOGISTIC-BINARY	0.217	0.145	0.289	3.34e-09	11219	4719	6500
Volume	VAT	22679	Minimum carotid IMT (intima-medial thickness) at 240 degrees	Physical Measures	Carotid ultrasound	LINEAR	-0.0695	-0.0926	-0.0465	3.47e-09	22572	NA	NA
Volume	VAT	1737	Childhood sunburn occasions	Lifestyle and History	Lifestyle and environment	ORDERED-LOGISTIC	-0.123	-0.164	-0.0823	3.59e-09	29202	NA	NA
Volume	VAT	21024	Ever diagnosed with IBS	Online follow-up	Digestive health	LOGISTIC-BINARY	0.215	0.143	0.286	4.03e-09	29367	3349	26018
Volume	VAT	30810	Phosphate	Biological samples	Renal	LINEAR	-0.0574	-0.0765	-0.0382	4.27e-09	32983	NA	NA
Volume	VAT	6150#1	Vascular/heart problems diagnosed by doctor: Heart attack	Medical history	Health and medical history	LOGISTIC-BINARY	0.427	0.284	0.569	4.31e-09	38635	463	38172
Volume	VAT	20003#1140864752	Treatment/medication code: lansoprazole	Medical history	Medications	LOGISTIC-BINARY	0.334	0.222	0.446	4.55e-09	38674	887	37787
Volume	VAT	25789	Volume of grey matter in Middle Frontal Gyrus (right)	Physical Measures	Brain MRI	LINEAR	-0.0736	-0.0982	-0.0489	4.87e-09	19587	NA	NA
Volume	VAT	6179#5	Mineral and other dietary supplements: Iron	Medical history	Health and medical history	LOGISTIC-BINARY	-0.378	-0.506	-0.252	5.31e-09	38116	1174	36942
Volume	VAT	100016	Potassium	Online follow-up	Estimated nutrients yesterday	LINEAR	-0.141	-0.188	-0.0933	6.17e-09	5729	NA	NA
Volume	VAT	25019	Volume of hippocampus (left)	Physical Measures	Brain MRI	LINEAR	-0.0726	-0.0972	-0.0479	8.2e-09	19577	NA	NA
Volume	VAT	30260	Mean reticulocyte volume	Biological samples	Red blood cells	LINEAR	-0.0554	-0.0743	-0.0365	9.26e-09	36185	NA	NA
Volume	VAT	100010	Portion size	Online follow-up	Typical diet yesterday	ORDERED-LOGISTIC	-0.35	-0.469	-0.23	9.78e-09	5726	NA	NA
Volume	VAT	6159#100	Pain type(s) experienced in last month	Medical history	Health and medical history	LOGISTIC-BINARY	-0.11	-0.148	-0.0726	9.83e-09	38646	17224	21422
Volume	VAT	6152#8	Asthma	Medical history	Health and medical history	LOGISTIC-BINARY	0.17	0.111	0.228	1.29e-08	38652	4239	34413
Volume	VAT	20500	Ever suffered mental distress preventing usual activities	Online follow-up	Mental distress	LOGISTIC-BINARY	0.143	0.094	0.193	1.32e-08	26459	8809	17650
Volume	VAT	6179#1	Mineral and other dietary supplements: Fish oil (including cod liver oil)	Medical history	Health and medical history	LOGISTIC-BINARY	-0.119	-0.16	-0.0777	1.36e-08	38116	12105	26011
Volume	VAT	20003#1140879616	Treatment/medication code: amitriptyline	Medical history	Medications	LOGISTIC-BINARY	0.545	0.356	0.732	1.38e-08	38674	389	38285
Volume	VAT	104430	Dried fruit intake	Online follow-up	Fruit/vegetables yesterday	ORDERED-LOGISTIC	-0.467	-0.629	-0.305	1.64e-08	5717	NA	NA
Volume	VAT	30070	EDW	Biological samples	Red blood cells	LINEAR	-0.0539	-0.0726	-0.0352	1.65e-08	36819	NA	NA
Volume	VAT	1120	Weekly usage of mobile phone in last 3 months	Lifestyle and History	Lifestyle and environment	ORDERED-LOGISTIC	0.104	0.0674	0.14	2.05e-08	33021	NA	NA
Volume	VAT	20003#2038460150	Treatment/medication code: paracetamol	Medical history	Medications	LOGISTIC-BINARY	0.156	0.102	0.211	2.07e-08	38674	5629	33045
Volume	VAT	25907	Volume of grey matter in Vermis VIIb Cerebellum	Physical Measures	Brain MRI	LINEAR	-0.073	-0.0985	-0.0475	2.1e-08	19587	NA	NA
Volume	VAT	20441	Ever had prolonged loss of interest in normal activities	Online follow-up	Depression	LOGISTIC-BINARY	0.135	0.088	0.183	2.2e-08	26738	10447	16291
Volume	VAT	20413	Frequency of inability to cease drinking in last year	Online follow-up	Alcohol use	ORDERED-LOGISTIC	0.262	0.17	0.353	2.22e-08	15721	NA	NA
Volume	VAT	100024	Calcium	Online follow-up	Estimated nutrients yesterday	LINEAR	-0.135	-0.182	-0.0876	2.48e-08	5729	NA	NA
Volume	VAT	1970	Nervous feelings	Lifestyle and History	Psychosocial factors	LOGISTIC-BINARY	0.138	0.0891	0.186	2.8e-08	37934	7603	30331
Volume	VAT	6145#100	"Illness, injury, bereavement, stress in last 2 years"	Lifestyle and History	Psychosocial factors	LOGISTIC-BINARY	-0.108	-0.146	-0.0696	2.96e-08	38078	22243	15835
Volume	VAT	1528	Water intake	Lifestyle and History	Lifestyle and environment	ORDERED-LOGISTIC	-0.101	-0.137	-0.0653	3.48e-08	35290	NA	NA
Volume	VAT	20127	Neuroticism score	Lifestyle and History	Psychosocial factors	ORDERED-LOGISTIC	0.0984	0.0634	0.133	3.7e-08	32592	NA	NA
Volume	VAT	670-1	Type of accommodation lived in	Lifestyle and History	Sociodemographics	MULTINOMIAL-LOGISTIC	NA	NA	NA	4.31e-08	NA	NA	NA
Volume	VAT	102090	Yogurt intake	Online follow-up	Soup/snacks/pastries yesterday	ORDERED-LOGISTIC	-0.297	-0.405	-0.19	6.1e-08	5726	NA	NA
Volume	VAT	100011	Iron	Online follow-up	Estimated nutrients yesterday	LINEAR	-0.13	-0.177	-0.0828	6.37e-08	5729	NA	NA
Volume	VAT	2090	"Seen doctor (GP) for nerves, anxiety, tension or depression"	Lifestyle and History	Psychosocial factors	LOGISTIC-BINARY	0.112	0.0714	0.153	7.06e-08	38516	12429	26087
Volume	VAT	6142#4	Current employment status: Unable to work because of sickness or disability	Lifestyle and History	Sociodemographics	LOGISTIC-BINARY	0.399	0.253	0.544	7.56e-08	38603	542	38061
Volume	VAT	20511	Recent poor appetite or overeating	Online follow-up	Depression	ORDERED-LOGISTIC	0.168	0.107	0.23	8.49e-08	26772	NA	NA
Volume	VAT	20548#3	Manifestations of mania or irritability: My thoughts were racing	Online follow-up	Mania	LOGISTIC-BINARY	0.204	0.129	0.279	9.93e-08	26679	2460	24219
Volume	VAT	1279	Exposure to tobacco smoke outside home	Lifestyle and History	Lifestyle and environment	ORDERED-LOGISTIC	0.132	0.0829	0.181	1.33e-07	35108	NA	NA
Volume	VAT	25816	Volume of grey matter in Superior Parietal Lobule (left)	Physical Measures	Brain MRI	LINEAR	-0.0682	-0.0935	-0.0428	1.33e-07	19587	NA	NA
Volume	VAT	100015	Vitamin C	Online follow-up	Estimated nutrients yesterday	LINEAR	-0.129	-0.177	-0.0809	1.34e-07	5729	NA	NA
Volume	VAT	25793	"Volume of grey matter in Inferior Frontal Gyrus, pars opercularis (right)"	Physical Measures	Brain MRI	LINEAR	-0.0679	-0.0932	-0.0427	1.36e-07	19587	NA	NA
Volume	VAT	20004#1479	Operation code: varicose vein surgery	Medical history	Operations	LOGISTIC-BINARY	-0.296	-0.406	-0.186	1.4e-07	38674	1266	37408
Volume	VAT	104460	Banana intake	Online follow-up	Fruit/vegetables yesterday	ORDERED-LOGISTIC	-0.256	-0.352	-0.161	1.47e-07	5724	NA	NA
Volume	VAT	2010	Suffer from 'nerves'	Lifestyle and History	Psychosocial factors	LOGISTIC-BINARY	0.129	0.0811	0.178	1.59e-07	37578	6798	30780
Volume	VAT	21037	Number of days (out of 10) with abdominal pain	Online follow-up	Digestive health	ORDERED-LOGISTIC	0.197	0.123	0.27	1.62e-07	8294	NA	NA
Volume	VAT	100270	Filtered coffee intake	Online follow-up	Hot/cold beverages yesterday	ORDERED-LOGISTIC	-0.327	-0.449	-0.205	1.62e-07	5718	NA	NA
Volume	VAT	100760	Breakfast cereal consumed	Online follow-up	Cereal yesterday	LOGISTIC-BINARY	-0.278	-0.383	-0.174	1.71e-07	5726	3939	1787
Volume	VAT	6160#5	Leisure/social activities: Other group activity	Lifestyle and History	Psychosocial factors	LOGISTIC-BINARY	-0.121	-0.166	-0.0753	2e-07	38620	9106	29514
Volume	VAT	20525	Able to pay rent/mortgage as an adult	Online follow-up	Traumatic events	ORDERED-LOGISTIC	-0.177	-0.244	-0.11	2.01e-07	26476	NA	NA
Volume	VAT	30180	Lymphocyte percentage	Biological samples	White blood cells	LINEAR	-0.0489	-0.0676	-0.0303	2.78e-07	36763	NA	NA
Volume	VAT	25830	Volume of grey matter in Frontal Medial Cortex (left)	Physical Measures	Brain MRI	LINEAR	-0.0642	-0.0888	-0.0397	3e-07	19587	NA	NA
Volume	VAT	25768	90th percentile of z-statistic (in group-defined amygdala activation mask) for faces-shapes contrast	Physical Measures	Brain MRI	LINEAR	-0.0725	-0.1	-0.0448	3.07e-07	17232	NA	NA
Volume	VAT	25054	Median z-statistic (in group-defined amygdala activation mask) for faces-shapes contrast	Physical Measures	Brain MRI	LINEAR	-0.0722	-0.0998	-0.0446	3.09e-07	17232	NA	NA
Volume	VAT	1239	Current tobacco smoking	Lifestyle and History	Lifestyle and environment	ORDERED-LOGISTIC	0.187	0.115	0.259	3.5e-07	38660	NA	NA
Volume	VAT	20448	Professional informed about depression	Online follow-up	Depression	LOGISTIC-BINARY	0.167	0.103	0.231	3.53e-07	14964	9545	5419
Volume	VAT	1031	Frequency of friend/family visits	Lifestyle and History	Psychosocial factors	ORDERED-LOGISTIC	-0.0878	-0.122	-0.054	3.61e-07	38041	NA	NA
Volume	VAT	30200	Neutrophill percentage	Biological samples	White blood cells	LINEAR	0.0488	0.03	0.0675	3.62e-07	36763	NA	NA
Volume	VAT	100025	Vitamin E	Online follow-up	Estimated nutrients yesterday	LINEAR	-0.123	-0.171	-0.0756	4.03e-07	5729	NA	NA
Volume	VAT	20003#1141156836	Treatment/medication code: candesartan cilexetil	Medical history	Medications	LOGISTIC-BINARY	0.462	0.282	0.64	4.44e-07	38674	286	38388
Volume	VAT	20528-0	Diagnosed with life-threatening illness	Online follow-up	Traumatic events	MULTINOMIAL-LOGISTIC	NA	NA	NA	4.63e-07	NA	NA	NA
Volume	VAT	22607#2	Workplace very cold	Online follow-up	Employment history	LOGISTIC-BINARY	0.217	0.133	0.301	4.65e-07	20963	1779	19184
Volume	VAT	6150#2	Vascular/heart problems diagnosed by doctor: Angina	Medical history	Health and medical history	LOGISTIC-BINARY	0.327	0.2	0.455	4.68e-07	38635	609	38026
Volume	VAT	23120	Arm fat mass (right)	Physical Measures	Impedance	LINEAR	0.0251	0.0153	0.035	5.36e-07	38186	NA	NA
Volume	VAT	21039	Severity of current abdominal distension/tightness	Online follow-up	Digestive health	ORDERED-LOGISTIC	0.216	0.132	0.3	5.4e-07	6674	NA	NA
Volume	VAT	2867	Age started smoking in former smokers	Lifestyle and History	Lifestyle and environment	LINEAR	-0.0914	-0.127	-0.0556	5.72e-07	8674	NA	NA
Volume	VAT	22660#103	Gap coding: Full-time or part-time education	Online follow-up	Employment history	LOGISTIC-BINARY	-0.191	-0.266	-0.116	5.9e-07	20239	3203	17036
Volume	VAT	2237	Plays computer games	Lifestyle and History	Lifestyle and environment	ORDERED-LOGISTIC	0.109	0.0661	0.152	6.9e-07	38666	NA	NA
Volume	VAT	1598	Average weekly spirits intake	Lifestyle and History	Lifestyle and environment	ORDERED-LOGISTIC	0.108	0.0655	0.151	6.97e-07	29374	NA	NA
Volume	VAT	20549#4	Substances taken for anxiety: Drugs or alcohol (more than once)	Online follow-up	Anxiety	LOGISTIC-BINARY	0.246	0.149	0.343	7.02e-07	26702	1406	25296
Volume	VAT	6146#3	Attendance/disability/mobility allowance: Blue badge	Lifestyle and History	Sociodemographics	LOGISTIC-BINARY	0.441	0.266	0.616	7.67e-07	38549	343	38206
Volume	VAT	25820	"Volume of grey matter in Supramarginal Gyrus, posterior division (left)"	Physical Measures	Brain MRI	LINEAR	-0.0631	-0.0883	-0.0379	8.99e-07	19587	NA	NA
Volume	VAT	20509	Recent inability to stop or control worrying	Online follow-up	Anxiety	ORDERED-LOGISTIC	0.139	0.0835	0.194	9.06e-07	26717	NA	NA
Volume	VAT	20425	Ever worried more than most people would in similar situation	Online follow-up	Anxiety	LOGISTIC-BINARY	0.144	0.0862	0.201	9.64e-07	22686	5771	16915
Volume	VAT	20544#11	Mental health problems ever diagnosed by a professional: Depression	Online follow-up	Mental distress	LOGISTIC-BINARY	0.142	0.0853	0.199	9.82e-07	26673	5497	21176
Volume	VAT	20003#1141152998	Treatment/medication code: irbesartan	Medical history	Medications	LOGISTIC-BINARY	0.49	0.292	0.686	1.05e-06	38674	238	38436
Volume	VAT	25791	"Volume of grey matter in Inferior Frontal Gyrus, pars triangularis (right)"	Physical Measures	Brain MRI	LINEAR	-0.0626	-0.0879	-0.0373	1.21e-06	19587	NA	NA
Volume	VAT	20544#6	Mental health problems ever diagnosed by a professional: Panic attacks	Online follow-up	Mental distress	LOGISTIC-BINARY	0.263	0.156	0.369	1.22e-06	26661	1283	25378
Volume	VAT	3146	Speed of sound through heel	Physical Measures	Bone-densitometry of heel	LINEAR	-0.0609	-0.0856	-0.0363	1.23e-06	20747	NA	NA
Volume	VAT	991	Frequency of strenuous sports in last 4 weeks	Lifestyle and History	Lifestyle and environment	ORDERED-LOGISTIC	-0.228	-0.32	-0.136	1.25e-06	5588	NA	NA
Volume	VAT	20003#1140875408	Allopurinol	Medical history	Medications	LOGISTIC-BINARY	0.412	0.245	0.579	1.35e-06	38674	292	38382
Volume	VAT	25039	Median T2star in accumbens (right)	Physical Measures	Brain MRI	LINEAR	-0.0674	-0.0948	-0.0401	1.35e-06	18120	NA	NA
Volume	VAT	25861	Volume of grey matter in Occipital Fusiform Gyrus (right)	Physical Measures	Brain MRI	LINEAR	-0.0598	-0.084	-0.0355	1.36e-06	19587	NA	NA
Volume	VAT	102080	Yogurt/ice-cream consumers	Online follow-up	Soup/snacks/pastries yesterday	LOGISTIC-BINARY	-0.25	-0.352	-0.148	1.43e-06	5726	2247	3479
Volume	VAT	20544#15	Mental health problems ever diagnosed by a professional: Anxiety, nerves or generalized anxiety disorder	Online follow-up	Mental distress	LOGISTIC-BINARY	0.163	0.0969	0.23	1.44e-06	26669	3682	22987
Volume	VAT	25027	Median T2star in thalamus (right)	Physical Measures	Brain MRI	LINEAR	-0.0665	-0.0935	-0.0394	1.48e-06	18120	NA	NA
Volume	VAT	21057	Degree bothered by pain/problems during intercourse in the last 3 months	Online follow-up	Digestive health	ORDERED-LOGISTIC	0.178	0.105	0.251	1.58e-06	20872	NA	NA
Volume	VAT	22611#2	Workplace had a lot of cigarette smoke from other people smoking	Online follow-up	Employment history	LOGISTIC-BINARY	0.16	0.0942	0.225	1.7e-06	20898	3466	17432
Volume	VAT	2744	Birth weight of first child	Lifestyle and History	Sex-specific factors	ORDERED-LOGISTIC	-0.178	-0.25	-0.105	1.8e-06	15483	NA	NA
Volume	VAT	4204	Absence of notch position in the pulse waveform	Physical Measures	Arterial stiffness	LOGISTIC-BINARY	0.279	0.164	0.394	1.93e-06	12807	1263	11544
Volume	VAT	20546#4	Substances taken for depression: Drugs or alcohol (more than once)	Online follow-up	Depression	LOGISTIC-BINARY	0.204	0.12	0.289	2.04e-06	26677	1887	24790
Volume	VAT	1548	Variation in diet	Lifestyle and History	Lifestyle and environment	ORDERED-LOGISTIC	0.089	0.0521	0.126	2.33e-06	38096	NA	NA
Volume	VAT	20522	Been in a confiding relationship as an adult	Online follow-up	Traumatic events	ORDERED-LOGISTIC	-0.102	-0.144	-0.0595	2.47e-06	26227	NA	NA
Volume	VAT	20003#1141176832	Treatment/medication code: seretide 50 evohaler	Medical history	Medications	LOGISTIC-BINARY	0.464	0.269	0.657	2.62e-06	38674	316	38358
Volume	VAT	25882	Volume of grey matter in Putamen (left)	Physical Measures	Brain MRI	LINEAR	-0.0613	-0.0869	-0.0357	2.66e-06	19587	NA	NA
Volume	VAT	25817	Volume of grey matter in Superior Parietal Lobule (right)	Physical Measures	Brain MRI	LINEAR	-0.0609	-0.0863	-0.0355	2.69e-06	19587	NA	NA
Volume	VAT	2664-05-01	Reason for reducing amount of alcohol drunk	Lifestyle and History	Lifestyle and environment	MULTINOMIAL-LOGISTIC	NA	NA	NA	2.8e-06	NA	NA	NA
Volume	VAT	6143#1	Transport type for commuting to job workplace: Car/motor vehicle	Lifestyle and History	Sociodemographics	LOGISTIC-BINARY	0.159	0.0925	0.226	2.93e-06	24407	20320	4087
Volume	VAT	3147	"Heel quantitative ultrasound index (QUI), direct entry"	Physical Measures	Bone-densitometry of heel	LINEAR	-0.0581	-0.0825	-0.0337	3.13e-06	20747	NA	NA
Volume	VAT	78	"Heel bone mineral density (BMD) T-score, automated"	Physical Measures	Bone-densitometry of heel	LINEAR	-0.0581	-0.0825	-0.0337	3.13e-06	20747	NA	NA
Volume	VAT	3148	Heel bone mineral density (BMD)	Physical Measures	Bone-densitometry of heel	LINEAR	-0.058	-0.0824	-0.0336	3.26e-06	20738	NA	NA
Volume	VAT	20003#1140861954	Treatment/medication code: fenofibrate	Medical history	Medications	LOGISTIC-BINARY	1.15	0.655	1.63	3.58e-06	38674	36	38638
Volume	VAT	22129	Doctor diagnosed chronic bronchitis	Online follow-up	Medical information	LOGISTIC-BINARY	0.522	0.3	0.742	3.65e-06	21525	227	21298
Volume	VAT	6148#100	Eye problems/disorders	Medical history	Health and medical history	LOGISTIC-BINARY	-0.209	-0.298	-0.121	3.66e-06	12277	10231	2046
Volume	VAT	6149#6	Mouth/teeth dental problems: Dentures	Medical history	Health and medical history	LOGISTIC-BINARY	0.143	0.0823	0.203	3.71e-06	38111	3803	34308
Volume	VAT	6149#3	Mouth/teeth dental problems: Bleeding gums	Medical history	Health and medical history	LOGISTIC-BINARY	0.129	0.0743	0.184	3.72e-06	38111	5277	32834
Volume	VAT	25844	Volume of grey matter in Cuneal Cortex (left)	Physical Measures	Brain MRI	LINEAR	-0.059	-0.084	-0.034	3.73e-06	19587	NA	NA
Volume	VAT	6164#4	Types of physical activity in last 4 weeks: Light DIY (eg: pruning, watering the lawn)	Lifestyle and History	Lifestyle and environment	LOGISTIC-BINARY	-0.0886	-0.126	-0.051	3.83e-06	38127	21578	16549
Volume	VAT	20003#1140860696	Treatment/medication code: lisinopril	Medical history	Medications	LOGISTIC-BINARY	0.271	0.156	0.386	4.07e-06	38674	765	37909
Volume	VAT	25852	Volume of grey matter in Lingual Gyrus (left)	Physical Measures	Brain MRI	LINEAR	-0.0527	-0.0752	-0.0303	4.15e-06	19587	NA	NA
Volume	VAT	22130	COPD	Online follow-up	Medical information	LOGISTIC-BINARY	0.51	0.292	0.727	4.25e-06	21525	227	21298
Volume	VAT	20003#1141194794	Treatment/medication code: bendroflumethiazide	Medical history	Medications	LOGISTIC-BINARY	0.218	0.125	0.31	4.3e-06	38674	1313	37361
Volume	VAT	2887	Number of cigarettes previously smoked daily	Lifestyle and History	Lifestyle and environment	ORDERED-LOGISTIC	0.18	0.103	0.257	4.36e-06	8253	NA	NA
Volume	VAT	22609#2	Workplace very dusty	Online follow-up	Employment history	LOGISTIC-BINARY	0.177	0.101	0.253	4.69e-06	20863	2190	18673
Volume	VAT	20004#1496	Operation code: knee surgery (not replacement)	Medical history	Operations	LOGISTIC-BINARY	-0.241	-0.344	-0.137	5e-06	38674	1081	37593
Volume	VAT	1269	Exposure to tobacco smoke at home	Lifestyle and History	Lifestyle and environment	ORDERED-LOGISTIC	0.215	0.122	0.308	5.49e-06	36739	NA	NA
Volume	VAT	20091#1	Type of sliced bread eaten: white	Online follow-up	Bread/pasta/rice yesterday	LOGISTIC-BINARY	0.278	0.158	0.398	5.74e-06	5726	1010	4716
Volume	VAT	25026	Median T2star in thalamus (left)	Physical Measures	Brain MRI	LINEAR	-0.0623	-0.0892	-0.0354	5.81e-06	18120	NA	NA
Volume	VAT	25822	Volume of grey matter in Angular Gyrus (left)	Physical Measures	Brain MRI	LINEAR	-0.0589	-0.0845	-0.0334	6.12e-06	19587	NA	NA
Volume	VAT	20003#1140874930	Treatment/medication code: prednisolone	Medical history	Medications	LOGISTIC-BINARY	0.687	0.386	0.983	6.33e-06	38674	131	38543
Volume	VAT	21074	Diarrhoea when IBS symptoms first began	Online follow-up	Digestive health	LOGISTIC-BINARY	0.326	0.185	0.468	6.35e-06	3259	1670	1589
Volume	VAT	25881	Volume of grey matter in Caudate (right)	Physical Measures	Brain MRI	LINEAR	-0.0582	-0.0835	-0.0329	6.46e-06	19587	NA	NA
Volume	VAT	6146#2	Attendance/disability/mobility allowance: Disability living allowance	Lifestyle and History	Sociodemographics	LOGISTIC-BINARY	0.393	0.221	0.564	6.76e-06	38549	406	38143
Volume	VAT	20004#1404	Operation code: umbilical hernia repair	Medical history	Operations	LOGISTIC-BINARY	0.462	0.26	0.663	7.03e-06	38674	231	38443
Volume	VAT	6155#7	Vitamin and mineral supplements: Multivitamins +/- minerals	Medical history	Health and medical history	LOGISTIC-BINARY	-0.105	-0.151	-0.0592	7.24e-06	38077	8552	29525
Volume	VAT	20003#1140879778	Treatment/medication code: doxazosin	Medical history	Medications	LOGISTIC-BINARY	0.406	0.227	0.583	7.6e-06	38674	260	38414
Volume	VAT	25764	90th percentile of z-statistic (in group-defined mask) for faces activation	Physical Measures	Brain MRI	LINEAR	-0.0631	-0.0908	-0.0355	7.65e-06	17232	NA	NA
Volume	VAT	20497	Repeated disturbing thoughts of stressful experience in past month	Online follow-up	Traumatic events	ORDERED-LOGISTIC	0.116	0.0651	0.167	7.94e-06	26766	NA	NA
Volume	VAT	20491	Someone to take to doctor when needed as a child	Online follow-up	Traumatic events	ORDERED-LOGISTIC	-0.142	-0.205	-0.0796	8.99e-06	26659	NA	NA
Volume	VAT	981	Duration walking for pleasure	Lifestyle and History	Lifestyle and environment	ORDERED-LOGISTIC	-0.0883	-0.127	-0.0493	9.08e-06	29078	NA	NA
Volume	VAT	6149#100	Mouth/teeth dental problems	Medical history	Health and medical history	LOGISTIC-BINARY	-0.0891	-0.128	-0.0497	9.09e-06	38111	25223	12888
Volume	VAT	100490	Intake of sugar added to tea	Online follow-up	Hot/cold beverages yesterday	ORDERED-LOGISTIC	0.347	0.194	0.501	9.59e-06	5726	NA	NA
Volume	VAT	20003#1140879406	Treatment/medication code: ranitidine	Medical history	Medications	LOGISTIC-BINARY	0.349	0.194	0.502	9.66e-06	38674	469	38205
Volume	VAT	1980	Worrier / anxious feelings	Lifestyle and History	Psychosocial factors	LOGISTIC-BINARY	0.085	0.0473	0.123	9.77e-06	37850	19896	17954
Volume	VAT	25032	Median T2star in pallidum (left)	Physical Measures	Brain MRI	LINEAR	-0.0615	-0.0888	-0.0343	9.78e-06	18120	NA	NA
Volume	VAT	22640#1	Mixture of day and night shifts worked: Shift pattern was worked for whole of job	Online follow-up	Employment history	LOGISTIC-BINARY	0.15	0.0832	0.216	1.03e-05	21105	3224	17881
Volume	VAT	1050	Time spend outdoors in summer	Lifestyle and History	Lifestyle and environment	ORDERED-LOGISTIC	0.0834	0.0462	0.121	1.1e-05	34873	NA	NA
Volume	VAT	6159#8	Pain type(s) experienced in last month: Pain all over the body	Medical history	Health and medical history	LOGISTIC-BINARY	0.404	0.222	0.583	1.16e-05	38646	347	38299
Volume	VAT	25823	Volume of grey matter in Angular Gyrus (right)	Physical Measures	Brain MRI	LINEAR	-0.0559	-0.0809	-0.0308	1.24e-05	19587	NA	NA
Volume	VAT	21033	Frequency of hard/lumpy stools in the last 3 months	Online follow-up	Digestive health	ORDERED-LOGISTIC	0.0898	0.0494	0.13	1.3e-05	30149	NA	NA
Volume	VAT	20003#1140862148	Treatment/medication code: serevent 25mcg inhaler	Medical history	Medications	LOGISTIC-BINARY	0.905	0.493	1.31	1.32e-05	38674	67	38607
Volume	VAT	6164#1	Types of physical activity in last 4 weeks: Walking for pleasure (not as a means of transport)	Lifestyle and History	Lifestyle and environment	LOGISTIC-BINARY	-0.0958	-0.139	-0.0527	1.32e-05	38127	29171	8956
Volume	VAT	22616#0	Breathing problems during period of job: No	Online follow-up	Employment history	LOGISTIC-BINARY	-0.361	-0.523	-0.198	1.4e-05	21105	20638	467
Volume	VAT	25893	Volume of grey matter in I-IV Cerebellum (left)	Physical Measures	Brain MRI	LINEAR	-0.0554	-0.0804	-0.0304	1.4e-05	19587	NA	NA
Volume	VAT	20514	Recent lack of interest or pleasure in doing things	Online follow-up	Depression	ORDERED-LOGISTIC	0.129	0.0708	0.187	1.4e-05	26745	NA	NA
Volume	VAT	20003#1140881856	Treatment/medication code: salbutamol	Medical history	Medications	LOGISTIC-BINARY	0.439	0.24	0.636	1.42e-05	38674	306	38368
Volume	VAT	20417	"Tense, sore, or aching muscles during worst period of anxiety"	Online follow-up	Anxiety	LOGISTIC-BINARY	0.21	0.115	0.305	1.44e-05	7480	2814	4666
Volume	VAT	22620#1	Job involved shift work: Yes	Online follow-up	Employment history	LOGISTIC-BINARY	0.119	0.0653	0.173	1.48e-05	21105	6290	14815
Volume	VAT	100023	Starch	Online follow-up	Estimated nutrients yesterday	LINEAR	-0.102	-0.149	-0.0559	1.53e-05	5729	NA	NA
Volume	VAT	20160	Ever smoked	Lifestyle and History	Lifestyle and environment	LOGISTIC-BINARY	0.0834	0.0455	0.121	1.62e-05	38594	21998	16596
Volume	VAT	20411-0	Ever been injured or injured someone else through drinking alcohol	Online follow-up	Alcohol use	MULTINOMIAL-LOGISTIC	NA	NA	NA	1.63e-05	NA	NA	NA
Volume	VAT	20520	Recent worrying too much about different things	Online follow-up	Anxiety	ORDERED-LOGISTIC	0.11	0.0598	0.16	1.65e-05	26716	NA	NA
Volume	VAT	22671	Mean carotid IMT (intima-medial thickness) at 120 degrees	Physical Measures	Carotid ultrasound	LINEAR	-0.0488	-0.0711	-0.0266	1.7e-05	22733	NA	NA
Volume	VAT	20544#16	Mental health problems ever diagnosed by a professional: Anorexia nervosa	Online follow-up	Mental distress	LOGISTIC-BINARY	-1.3	-1.91	-0.72	1.74e-05	26659	126	26533
Volume	VAT	22630#9	Non-shift work	Online follow-up	Employment history	LOGISTIC-BINARY	0.124	0.067	0.181	1.92e-05	21105	5102	16003
Volume	VAT	4728	Leg pain on walking	Medical history	Health and medical history	LOGISTIC-BINARY	0.192	0.104	0.281	2.01e-05	12855	1881	10974
Volume	VAT	6152#6	"Blood clot, DVT, bronchitis, emphysema, asthma, rhinitis, eczema, allergy diagnosed by doctor": Emphysema/chronic bronchitis	Medical history	Health and medical history	LOGISTIC-BINARY	0.423	0.228	0.616	2.01e-05	38652	273	38379
Fat	Liver	30620	ALT	Biological samples	Liver	LINEAR	0.226	0.216	0.237	1e-300	36127	NA	NA
Fat	Liver	30870	Triglycerides	Biological samples	Cardiovascular	LINEAR	0.177	0.166	0.188	7.66e-219	36108	NA	NA
Fat	Liver	49	Hip circumference	Physical Measures	Body size measures	LINEAR	-0.109	-0.116	-0.102	3.76e-199	38605	NA	NA
Fat	Liver	30730	GGT	Biological samples	Liver	LINEAR	0.162	0.151	0.172	1.63e-194	36114	NA	NA
Fat	Liver	30830	SHBG	Biological samples	Cancer	LINEAR	-0.156	-0.166	-0.146	4.75e-189	32675	NA	NA
Fat	Liver	23108	L leg	Physical Measures	Impedance	LINEAR	0.13	0.121	0.139	2.35e-179	38155	NA	NA
Fat	Liver	23107	R leg	Physical Measures	Impedance	LINEAR	0.128	0.119	0.137	4.56e-179	38157	NA	NA
Fat	Liver	23113	Leg fat-free mass (right)	Physical Measures	Impedance	LINEAR	-0.0625	-0.0668	-0.0582	3.2e-176	38151	NA	NA
Fat	Liver	23114	Leg predicted mass (right)	Physical Measures	Impedance	LINEAR	-0.062	-0.0663	-0.0577	1.23e-174	38151	NA	NA
Fat	Liver	21002	Weight	Physical Measures	Body size measures	LINEAR	-0.0595	-0.0637	-0.0553	3.03e-167	38587	NA	NA
Fat	Liver	23117	Leg fat-free mass (left)	Physical Measures	Impedance	LINEAR	-0.0587	-0.0628	-0.0545	3.15e-167	38146	NA	NA
Fat	Liver	23118	Leg predicted mass (left)	Physical Measures	Impedance	LINEAR	-0.0585	-0.0626	-0.0543	9.74e-167	38146	NA	NA
Fat	Liver	23105	Basal metabolic rate	Physical Measures	Impedance	LINEAR	-0.0531	-0.0569	-0.0493	8.78e-161	38157	NA	NA
Fat	Liver	12336	Ventricular rate	Physical Measures	ECG at rest	LINEAR	0.162	0.15	0.174	1.81e-155	33676	NA	NA
Fat	Liver	30650	Aspartate aminotransferase	Biological samples	Liver	LINEAR	0.152	0.141	0.164	2.26e-151	35988	NA	NA
Fat	Liver	12679	Number of beats in waveform average for PWA	Physical Measures	Heart MRI	LINEAR	0.157	0.145	0.17	5.9e-139	33891	NA	NA
Fat	Liver	23102	Whole body water mass	Physical Measures	Impedance	LINEAR	-0.0518	-0.0559	-0.0476	1.17e-128	38158	NA	NA
Fat	Liver	23101	Whole body FF mass	Physical Measures	Impedance	LINEAR	-0.0509	-0.055	-0.0467	1.63e-126	38158	NA	NA
Fat	Liver	21001	Body mass index (BMI)	Physical Measures	Body size measures	LINEAR	-0.0657	-0.0711	-0.0602	2.25e-122	38582	NA	NA
Fat	Liver	30250	RC	Biological samples	Red blood cells	LINEAR	0.126	0.115	0.137	1.94e-108	36137	NA	NA
Fat	Liver	30300	HLSRC	Biological samples	Red blood cells	LINEAR	0.125	0.114	0.136	1.77e-107	36137	NA	NA
Fat	Liver	23106	Whole body	Physical Measures	Impedance	LINEAR	0.0792	0.072	0.0864	3.5e-103	38156	NA	NA
Fat	Liver	30880	Urate	Biological samples	Renal	LINEAR	0.0976	0.0884	0.107	4.33e-95	36090	NA	NA
Fat	Liver	30290	High light scatter reticulocyte percentage	Biological samples	Red blood cells	LINEAR	0.115	0.104	0.126	1.37e-88	36138	NA	NA
Fat	Liver	30240	Reticulocyte percentage	Biological samples	Red blood cells	LINEAR	0.115	0.103	0.126	2.02e-86	36138	NA	NA
Fat	Liver	23129	Trunk fat-free mass	Physical Measures	Impedance	LINEAR	-0.0458	-0.0503	-0.0412	3.63e-85	38111	NA	NA
Fat	Liver	23130	Trunk predicted mass	Physical Measures	Impedance	LINEAR	-0.0451	-0.0496	-0.0405	2.06e-82	38108	NA	NA
Fat	Liver	30750	HbA1c	Biological samples	Diabetes	LINEAR	0.112	0.1	0.123	2.32e-81	35881	NA	NA
Fat	Liver	30600	Albumin	Biological samples	Liver	LINEAR	0.117	0.105	0.13	1.41e-77	32999	NA	NA
Fat	Liver	30020	Heamoglobin conc.	Biological samples	Red blood cells	LINEAR	0.0858	0.0767	0.0948	1.3e-76	36776	NA	NA
Fat	Liver	1687	Comparative body size at age 10	Lifestyle and History	Early life factors	ORDERED-LOGISTIC	-0.22	-0.243	-0.197	4.79e-76	38191	NA	NA
Fat	Liver	30760	HDL cholesterol	Biological samples	Cardiovascular	LINEAR	-0.0995	-0.11	-0.0888	2.74e-74	32987	NA	NA
Fat	Liver	23124	Arm fat mass (left)	Physical Measures	Impedance	LINEAR	-0.0571	-0.0633	-0.0509	4.7e-72	38137	NA	NA
Fat	Liver	102	"Pulse rate, automated reading"	Physical Measures	Blood pressure	LINEAR	0.107	0.0951	0.119	1.04e-70	36281	NA	NA
Fat	Liver	23120	Arm fat mass (right)	Physical Measures	Impedance	LINEAR	-0.0561	-0.0623	-0.0498	1.97e-69	38142	NA	NA
Fat	Liver	23125	Arm fat-free mass (left)	Physical Measures	Impedance	LINEAR	-0.0394	-0.0439	-0.0349	1.78e-66	38136	NA	NA
Fat	Liver	23126	Arm predicted mass (left)	Physical Measures	Impedance	LINEAR	-0.0389	-0.0433	-0.0344	6.68e-65	38134	NA	NA
Fat	Liver	12687	Mean arterial pressure during PWA	Physical Measures	Heart MRI	LINEAR	0.101	0.0884	0.113	9.2e-59	33676	NA	NA
Fat	Liver	30030	Haematocrit percentage	Biological samples	Red blood cells	LINEAR	0.076	0.0667	0.0854	6.72e-57	36775	NA	NA
Fat	Liver	30120	Lymphocyte count	Biological samples	White blood cells	LINEAR	0.0922	0.0805	0.104	8.26e-54	36720	NA	NA
Fat	Liver	30710	C-reactive protein	Biological samples	Cardiovascular	LINEAR	0.0835	0.0725	0.0945	7.95e-50	36059	NA	NA
Fat	Liver	23121	R arm FF mass	Physical Measures	Impedance	LINEAR	-0.0334	-0.038	-0.0289	3.56e-47	38140	NA	NA
Fat	Liver	23122	R arm pred. mass	Physical Measures	Impedance	LINEAR	-0.033	-0.0375	-0.0285	3.42e-46	38140	NA	NA
Fat	Liver	30010	Red blood cell (erythrocyte) count	Biological samples	Red blood cells	LINEAR	0.0705	0.0607	0.0803	3.64e-45	36775	NA	NA
Fat	Liver	30680	Calcium	Biological samples	Bone and joint	LINEAR	0.0849	0.0723	0.0975	1.42e-39	32999	NA	NA
Fat	Liver	12697	Systolic brachial blood pressure	Physical Measures	Heart MRI	LINEAR	0.0793	0.0675	0.0912	3.77e-39	34026	NA	NA
Fat	Liver	23119	Arm fat percentage (right)	Physical Measures	Impedance	LINEAR	-0.0359	-0.0416	-0.0303	6.37e-36	38144	NA	NA
Fat	Liver	12683	End systolic pressure during PWA	Physical Measures	Heart MRI	LINEAR	0.0769	0.0648	0.089	2.13e-35	33603	NA	NA
Fat	Liver	3062	FVC	Physical Measures	Spirometry	LINEAR	-0.0485	-0.0562	-0.0409	2.18e-35	35675	NA	NA
Fat	Liver	30860	Total protein	Biological samples	Renal	LINEAR	0.0786	0.0661	0.0912	1.2e-34	32955	NA	NA
Fat	Liver	20257	FVC Z-score	Physical Measures	Spirometry	LINEAR	0.0797	0.067	0.0924	1.34e-34	31740	NA	NA
Fat	Liver	23123	Arm fat percentage (left)	Physical Measures	Impedance	LINEAR	-0.0346	-0.0401	-0.0291	1.76e-34	38140	NA	NA
[truncated: 649 more rows]

## Sheet: File 1e LDSC intercept
volume	organ	intercept	std_err
Volume	VAT	1.0158	0.0096
Volume	ASAT	1.0288	0.0086
Volume	Lungs	1.0296	0.0092
Volume	Spleen	1.0342	0.0097
Volume	Kidney	1.0313	0.0098
Volume	Pancreas	0.9931	0.0094
Volume	Liver	1.0261	0.0088
Fat	Pancreas	1.0102	0.0095
Fat	Liver	1.0185	0.0085
Iron	Pancreas	0.9888	0.0079
Iron	Liver	1.0036	0.0084

## Sheet: File 1f Genetic correlation
trait_1	trait_2	rg	se	z	p
Liver Vol adjusted	Pancreas Vol adjusted	0.0887	0.0819	1.08	0.279
Liver Vol adjusted	Kidney Vol adjusted	0.26	0.0635	4.09	4.29e-05
Liver Vol adjusted	Spleen Vol adjusted	0.223	0.0677	3.3	0.000978
Liver Vol adjusted	Lung Vol adjusted	0.129	0.0725	1.78	0.0753
Liver Vol adjusted	ASAT Vol adjusted	-0.165	0.0726	-2.27	0.0233
Liver Vol adjusted	VAT Vol adjusted	-0.0135	0.0711	-0.189	0.85
Liver Vol adjusted	Liver Fat adjusted	0.317	0.0982	3.23	0.00123
Liver Vol adjusted	Pancreas Fat adjusted	-0.0726	0.0954	-0.76	0.447
Liver Vol adjusted	Liver Iron adjusted	-0.0042	0.0828	-0.0502	0.96
Liver Vol adjusted	Pancreas Iron adjusted	-0.13	0.116	-1.11	0.266
Liver Vol unadjusted	Liver Vol adjusted	0.664	0.0409	16.2	3.19e-59
Pancreas Vol adjusted	Kidney Vol adjusted	0.137	0.0756	1.81	0.0705
Pancreas Vol adjusted	Spleen Vol adjusted	-0.0179	0.0741	-0.241	0.809
Pancreas Vol adjusted	Lung Vol adjusted	-0.196	0.0883	-2.22	0.0263
Pancreas Vol adjusted	ASAT Vol adjusted	0.0748	0.0814	0.919	0.358
Pancreas Vol adjusted	VAT Vol adjusted	-0.0451	0.0832	-0.542	0.588
Pancreas Vol adjusted	Liver Fat adjusted	-0.0887	0.098	-0.905	0.366
Pancreas Vol adjusted	Pancreas Fat adjusted	-0.558	0.0906	-6.17	6.95e-10
Pancreas Vol adjusted	Liver Iron adjusted	-0.0959	0.157	-0.612	0.54
Pancreas Vol adjusted	Pancreas Iron adjusted	-0.476	0.133	-3.58	0.000341
Pancreas Vol unadjusted	Liver Vol unadjusted	0.17	0.0646	2.64	0.00828
Pancreas Vol unadjusted	Pancreas Vol adjusted	0.98	0.00365	269	0
Kidney Vol adjusted	Spleen Vol adjusted	0.0619	0.0641	0.966	0.334
Kidney Vol adjusted	Lung Vol adjusted	0.184	0.103	1.78	0.0753
Kidney Vol adjusted	ASAT Vol adjusted	-0.31	0.0604	-5.14	2.76e-07
Kidney Vol adjusted	VAT Vol adjusted	-0.142	0.0822	-1.72	0.0847
Kidney Vol adjusted	Liver Fat adjusted	-0.0865	0.0944	-0.916	0.36
Kidney Vol adjusted	Pancreas Fat adjusted	-0.189	0.0739	-2.56	0.0104
Kidney Vol adjusted	Liver Iron adjusted	-0.0127	0.0564	-0.225	0.822
Kidney Vol adjusted	Pancreas Iron adjusted	-0.0874	0.0971	-0.901	0.368
Kidney Vol unadjusted	Liver Vol unadjusted	0.578	0.0458	12.6	1.99e-36
Kidney Vol unadjusted	Pancreas Vol unadjusted	0.214	0.0685	3.12	0.0018
Kidney Vol unadjusted	Kidney Vol adjusted	0.823	0.0188	43.7	0
Spleen Vol adjusted	Lung Vol adjusted	0.0372	0.0726	0.512	0.608
Spleen Vol adjusted	ASAT Vol adjusted	-0.138	0.0627	-2.2	0.0279
Spleen Vol adjusted	VAT Vol adjusted	0.0044	0.0846	0.0516	0.959
Spleen Vol adjusted	Liver Fat adjusted	0.112	0.0775	1.45	0.148
Spleen Vol adjusted	Pancreas Fat adjusted	-0.205	0.0976	-2.1	0.0355
Spleen Vol adjusted	Liver Iron adjusted	-0.0433	0.0846	-0.512	0.609
Spleen Vol adjusted	Pancreas Iron adjusted	-0.154	0.104	-1.49	0.137
Spleen Vol unadjusted	Liver Vol unadjusted	0.474	0.0584	8.11	5.13e-16
Spleen Vol unadjusted	Pancreas Vol unadjusted	0.0762	0.0765	0.997	0.319
Spleen Vol unadjusted	Kidney Vol unadjusted	0.293	0.0654	4.47	7.64e-06
Spleen Vol unadjusted	Spleen Vol adjusted	0.89	0.0207	43.1	0
Lung Vol adjusted	ASAT Vol adjusted	-0.509	0.0614	-8.28	1.25e-16
Lung Vol adjusted	VAT Vol adjusted	-0.207	0.097	-2.13	0.0329
Lung Vol adjusted	Liver Fat adjusted	-0.166	0.0998	-1.66	0.0966
Lung Vol adjusted	Pancreas Fat adjusted	-0.0674	0.0965	-0.699	0.485
Lung Vol adjusted	Liver Iron adjusted	0.11	0.0877	1.25	0.21
Lung Vol adjusted	Pancreas Iron adjusted	0.064	0.119	0.539	0.59
Lung Vol unadjusted	Liver Vol unadjusted	0.0352	0.0565	0.624	0.532
Lung Vol unadjusted	Pancreas Vol unadjusted	-0.0477	0.0751	-0.635	0.525
Lung Vol unadjusted	Kidney Vol unadjusted	0.146	0.0621	2.35	0.0189
Lung Vol unadjusted	Spleen Vol unadjusted	0.0701	0.0627	1.12	0.264
Lung Vol unadjusted	Lung Vol adjusted	0.775	0.0248	31.2	2.92e-214
ASAT Vol adjusted	VAT Vol adjusted	0.308	0.0727	4.24	2.26e-05
ASAT Vol adjusted	Liver Fat adjusted	0.271	0.0899	3.02	0.00257
ASAT Vol adjusted	Pancreas Fat adjusted	0.0554	0.086	0.644	0.519
ASAT Vol adjusted	Liver Iron adjusted	-0.0414	0.061	-0.679	0.497
ASAT Vol adjusted	Pancreas Iron adjusted	0.149	0.107	1.39	0.165
ASAT Vol unadjusted	Liver Vol unadjusted	0.628	0.0457	13.8	4.26e-43
ASAT Vol unadjusted	Pancreas Vol unadjusted	0.126	0.0703	1.79	0.0739
ASAT Vol unadjusted	Kidney Vol unadjusted	0.342	0.0534	6.42	1.36e-10
ASAT Vol unadjusted	Spleen Vol unadjusted	0.28	0.0697	4.01	6.09e-05
ASAT Vol unadjusted	Lung Vol unadjusted	-0.406	0.0587	-6.92	4.48e-12
ASAT Vol unadjusted	ASAT Vol adjusted	0.345	0.0621	5.55	2.91e-08
VAT Vol adjusted	Liver Fat adjusted	0.483	0.0947	5.1	3.38e-07
VAT Vol adjusted	Pancreas Fat adjusted	0.438	0.0874	5.02	5.2e-07
VAT Vol adjusted	Liver Iron adjusted	0.0721	0.0653	1.1	0.269
VAT Vol adjusted	Pancreas Iron adjusted	-0.0478	0.11	-0.435	0.664
VAT Vol unadjusted	Liver Vol unadjusted	0.584	0.0452	12.9	3.68e-38
VAT Vol unadjusted	Pancreas Vol unadjusted	0.0692	0.0711	0.973	0.33
VAT Vol unadjusted	Kidney Vol unadjusted	0.327	0.062	5.27	1.35e-07
VAT Vol unadjusted	Spleen Vol unadjusted	0.301	0.0512	5.87	4.29e-09
VAT Vol unadjusted	Lung Vol unadjusted	-0.278	0.0601	-4.62	3.77e-06
VAT Vol unadjusted	ASAT Vol unadjusted	0.782	0.0314	24.9	4.6e-137
VAT Vol unadjusted	VAT Vol adjusted	0.587	0.0421	13.9	3.61e-44
Liver Fat adjusted	Pancreas Fat adjusted	0.146	0.113	1.29	0.198
Liver Fat adjusted	Liver Iron adjusted	0.119	0.123	0.964	0.335
Liver Fat adjusted	Pancreas Iron adjusted	0.17	0.139	1.23	0.22
Liver Fat unadjusted	Liver Vol unadjusted	0.505	0.056	9.02	1.82e-19
Liver Fat unadjusted	Pancreas Vol unadjusted	-0.0539	0.0801	-0.672	0.501
Liver Fat unadjusted	Kidney Vol unadjusted	0.158	0.0697	2.26	0.0237
Liver Fat unadjusted	Spleen Vol unadjusted	0.261	0.0605	4.31	1.62e-05
Liver Fat unadjusted	Lung Vol unadjusted	-0.34	0.066	-5.16	2.51e-07
Liver Fat unadjusted	ASAT Vol unadjusted	0.574	0.0684	8.39	4.66e-17
Liver Fat unadjusted	VAT Vol unadjusted	0.67	0.0689	9.72	2.49e-22
Liver Fat unadjusted	Liver Fat adjusted	0.832	0.0414	20.1	4.79e-90
Pancreas Fat adjusted	Liver Iron adjusted	0.0474	0.0817	0.58	0.562
Pancreas Fat adjusted	Pancreas Iron adjusted	0.52	0.12	4.35	1.35e-05
Pancreas Fat unadjusted	Liver Vol unadjusted	0.225	0.0824	2.73	0.00639
Pancreas Fat unadjusted	Pancreas Vol unadjusted	-0.45	0.0949	-4.75	2.07e-06
Pancreas Fat unadjusted	Kidney Vol unadjusted	0.0164	0.0806	0.204	0.838
Pancreas Fat unadjusted	Spleen Vol unadjusted	-0.0418	0.0798	-0.524	0.6
Pancreas Fat unadjusted	Lung Vol unadjusted	-0.246	0.0799	-3.09	0.00203
Pancreas Fat unadjusted	ASAT Vol unadjusted	0.378	0.0777	4.86	1.15e-06
Pancreas Fat unadjusted	VAT Vol unadjusted	0.569	0.0696	8.18	2.79e-16
Pancreas Fat unadjusted	Liver Fat unadjusted	0.336	0.0964	3.49	0.000484
Pancreas Fat unadjusted	Pancreas Fat adjusted	0.874	0.0268	32.6	5.28e-233
Liver Iron adjusted	Pancreas Iron adjusted	-0.0805	0.105	-0.768	0.443
Liver Iron unadjusted	Liver Vol unadjusted	0.0025	0.0495	0.0499	0.96
Liver Iron unadjusted	Pancreas Vol unadjusted	-0.0857	0.149	-0.576	0.564
Liver Iron unadjusted	Kidney Vol unadjusted	-0.0307	0.0479	-0.641	0.522
Liver Iron unadjusted	Spleen Vol unadjusted	-0.0497	0.0741	-0.671	0.502
Liver Iron unadjusted	Lung Vol unadjusted	0.0814	0.0575	1.42	0.157
Liver Iron unadjusted	ASAT Vol unadjusted	-0.04	0.0654	-0.611	0.541
Liver Iron unadjusted	VAT Vol unadjusted	0.039	0.0813	0.48	0.631
Liver Iron unadjusted	Liver Fat unadjusted	0.106	0.149	0.712	0.477
Liver Iron unadjusted	Pancreas Fat unadjusted	0.0525	0.101	0.518	0.605
Liver Iron unadjusted	Liver Iron adjusted	0.998	0.0059	170	0
Pancreas Iron unadjusted	Liver Vol unadjusted	-0.22	0.093	-2.37	0.0178
Pancreas Iron unadjusted	Pancreas Vol unadjusted	-0.498	0.123	-4.05	5.17e-05
Pancreas Iron unadjusted	Kidney Vol unadjusted	-0.197	0.0891	-2.21	0.027
Pancreas Iron unadjusted	Spleen Vol unadjusted	-0.217	0.0994	-2.19	0.0288
Pancreas Iron unadjusted	Lung Vol unadjusted	0.0194	0.105	0.185	0.853
Pancreas Iron unadjusted	ASAT Vol unadjusted	-0.0893	0.108	-0.829	0.407
Pancreas Iron unadjusted	VAT Vol unadjusted	-0.177	0.109	-1.63	0.104
Pancreas Iron unadjusted	Liver Fat unadjusted	0.119	0.132	0.897	0.37
Pancreas Iron unadjusted	Pancreas Fat unadjusted	0.375	0.125	2.99	0.00276
Pancreas Iron unadjusted	Liver Iron unadjusted	-0.0576	0.103	-0.559	0.576
Pancreas Iron unadjusted	Pancreas Iron adjusted	0.99	0.0051	194	0

## Sheet: File 1g Genetic correlation wit
Trait	Organ	field_id	description	category	rg	se	z	p
Volume	Liver	21002	Weight	Physical Measures	0.6892	0.0361	19.0761	3.9857e-81
Volume	Liver	23098	Weight	Physical Measures	0.6907	0.0364	18.9749	2.748e-80
Volume	Liver	48	Waist circumference	Physical Measures	0.6587	0.036	18.3092	6.986e-75
Volume	Liver	23125	Arm fat-free mass (left)	Physical Measures	0.6826	0.0381	17.9346	6.3355e-72
Volume	Liver	23126	Arm predicted mass (left)	Physical Measures	0.683	0.0382	17.868	2.092e-71
Volume	Liver	23105	Basal metabolic rate	Physical Measures	0.6686	0.038	17.6113	2.0182e-69
Volume	Liver	23112	Leg fat mass (right)	Physical Measures	0.6169	0.0351	17.5938	2.7499e-69
Volume	Liver	23116	Leg fat mass (left)	Physical Measures	0.621	0.0354	17.5607	4.9223e-69
Volume	Liver	23100	Whole body fat mass	Physical Measures	0.6077	0.0349	17.4049	7.5701e-68
Volume	Liver	23120	Arm fat mass (right)	Physical Measures	0.6088	0.0354	17.2176	1.9586e-66
Volume	Liver	23124	Arm fat mass (left)	Physical Measures	0.6073	0.0353	17.2162	2.0063e-66
Volume	Liver	23122	Arm predicted mass (right)	Physical Measures	0.6652	0.0389	17.1173	1.1026e-65
Volume	Liver	23121	Arm fat-free mass (right)	Physical Measures	0.6666	0.039	17.0968	1.5682e-65
Volume	Liver	23128	Trunk fat mass	Physical Measures	0.5983	0.0351	17.0667	2.6271e-65
Volume	Liver	23118	Leg predicted mass (left)	Physical Measures	0.6375	0.0379	16.8269	1.5499e-63
Volume	Liver	23117	Leg fat-free mass (left)	Physical Measures	0.6363	0.038	16.7584	4.9204e-63
Volume	Liver	23102	Whole body water mass	Physical Measures	0.641	0.0383	16.7226	8.9756e-63
Volume	Liver	23101	Whole body fat-free mass	Physical Measures	0.6402	0.0384	16.6906	1.534e-62
Volume	Liver	49	Hip circumference	Physical Measures	0.6059	0.0367	16.5099	3.1136e-61
Volume	Liver	23130	Trunk predicted mass	Physical Measures	0.6243	0.0383	16.3039	9.2656e-60
Volume	Liver	23129	Trunk fat-free mass	Physical Measures	0.6224	0.0383	16.2646	1.7591e-59
Volume	Liver	23113	Leg fat-free mass (right)	Physical Measures	0.6218	0.0383	16.2425	2.5238e-59
Volume	Liver	23114	Leg predicted mass (right)	Physical Measures	0.6214	0.0384	16.1925	5.6979e-59
Volume	Liver	23104	Body mass index (BMI)	Physical Measures	0.5472	0.0359	15.2457	1.7582e-52
Volume	Liver	21001	Body mass index (BMI)	Physical Measures	0.5453	0.0358	15.2372	2.0031e-52
Volume	Liver	23111	Leg fat percentage (right)	Physical Measures	0.4746	0.0348	13.6335	2.532e-42
Volume	Liver	23115	Leg fat percentage (left)	Physical Measures	0.4805	0.0353	13.6112	3.4369e-42
Volume	Liver	23099	Body fat percentage	Physical Measures	0.4668	0.0344	13.5548	7.4259e-42
Volume	Liver	23127	Trunk fat percentage	Physical Measures	0.4652	0.0346	13.4446	3.312e-41
Volume	Liver	23119	Arm fat percentage (right)	Physical Measures	0.4569	0.0355	12.8572	7.8391e-38
Volume	Liver	23123	Arm fat percentage (left)	Physical Measures	0.4542	0.0358	12.6893	6.7764e-37
Volume	Liver	3143	Ankle spacing width	Physical Measures	0.4659	0.0375	12.4331	1.7279e-35
Volume	Liver	23110	Impedance of arm (left)	Physical Measures	-0.4368	0.0364	-11.9972	3.6764e-33
Volume	Liver	4100	Ankle spacing width (left)	Physical Measures	0.4767	0.0401	11.8864	1.3934e-32
Volume	Liver	23109	Impedance of arm (right)	Physical Measures	-0.4254	0.0361	-11.7691	5.6299e-32
Volume	Liver	23106	Impedance of whole body	Physical Measures	-0.4393	0.0379	-11.5979	4.2255e-31
Volume	Liver	4119	Ankle spacing width (right)	Physical Measures	0.4462	0.0406	10.9765	4.9583e-28
Volume	Liver	23107	Impedance of leg (right)	Physical Measures	-0.3769	0.0383	-9.8476	7.0198e-23
Volume	Liver	23108	Impedance of leg (left)	Physical Measures	-0.3789	0.039	-9.7156	2.5869e-22
Volume	Liver	1697	Comparative height size at age 10	Lifestyle and History	0.3746	0.041	9.1398	6.2567e-20
Volume	Liver	50	Standing height	Physical Measures	0.3298	0.0372	8.8686	7.4095e-19
Volume	Liver	20015	Sitting height	Physical Measures	0.3324	0.0378	8.7995	1.3742e-18
Volume	Liver	2178	Overall health rating	Medical history	0.325	0.0371	8.7491	2.1512e-18
Volume	Liver	30850	Testosterone (nmol/L)	Biological samples	-0.3992	0.0532	-7.5023	6.2718e-14
Volume	Liver	20153	Forced expiratory volume in 1-second (FEV1), predicted	Physical Measures	0.3082	0.0438	7.0372	1.9612e-12
Volume	Liver	2316	Wheeze or whistling in the chest in last year	Medical history	0.3267	0.0467	7.001	2.5415e-12
Volume	Liver	30530	Sodium in urine	Biological samples	0.2927	0.0427	6.8573	7.0193e-12
Volume	Liver	6150	Vascular/heart problems diagnosed by doctor: None of the above	Medical history	-0.2414	0.0359	-6.7167	1.8592e-11
Volume	Liver	6150	Vascular/heart problems diagnosed by doctor: High blood pressure	Medical history	0.2472	0.0371	6.6719	2.5254e-11
Volume	Liver	100010	Portion size	Online follow-up	0.6139	0.0924	6.6419	3.096e-11
Volume	Liver	20116	Smoking status: Never	Lifestyle and History	-0.2365	0.0374	-6.326	2.5153e-10
Volume	Liver	6154	Medication for pain relief, constipation, heartburn: None of the above	Medical history	-0.2782	0.044	-6.3245	2.5408e-10
Volume	Liver	2139	Age first had sexual intercourse	Lifestyle and History	-0.2262	0.0361	-6.2687	3.6419e-10
Volume	Liver	20022	Birth weight	Lifestyle and History	0.2499	0.0414	6.0434	1.5091e-09
Volume	Liver	1239	Current tobacco smoking	Lifestyle and History	0.2714	0.0457	5.9401	2.8485e-09
Volume	Liver	6153	NA	Medical history	0.258	0.0436	5.9215	3.1899e-09
Volume	Liver	4548	Health satisfaction	Medical history	0.3132	0.0534	5.8672	4.4322e-09
Volume	Liver	30280	Immature reticulocyte fraction	Biological samples	0.247	0.0421	5.8607	4.6081e-09
Volume	Liver	2080	Frequency of tiredness / lethargy in last 2 weeks	Medical history	0.2578	0.0443	5.8172	5.984e-09
Volume	Liver	135	Number of self-reported non-cancer illnesses	Medical history	0.2997	0.0518	5.7905	7.0182e-09
Volume	Liver	1687	Comparative body size at age 10	Lifestyle and History	0.2219	0.0387	5.728	1.0164e-08
Volume	Liver	30510	Creatinine (enzymatic) in urine	Biological samples	0.248	0.0434	5.7183	1.0762e-08
Volume	Liver	6177	NA	Medical history	-0.2569	0.045	-5.7134	1.1071e-08
Volume	Liver	924	Usual walking pace	Lifestyle and History	-0.2144	0.0377	-5.6836	1.319e-08
Volume	Liver	30750	Glycated haemoglobin (mmol/mol)	Biological samples	0.1999	0.0352	5.6771	1.3699e-08
Volume	Liver	1050	Time spend outdoors in summer	Lifestyle and History	0.2219	0.0394	5.628	1.8232e-08
Volume	Liver	137	Number of treatments/medications taken	Medical history	0.2966	0.0541	5.4875	4.0771e-08
Volume	Liver	6149	Mouth/teeth dental problems: Dentures	Medical history	0.2193	0.0406	5.4065	6.4256e-08
Volume	Liver	1210	Snoring	Medical history	-0.2184	0.0411	-5.313	1.0781e-07
Volume	Liver	20459	General happiness with own health	Online follow-up	0.2931	0.0559	5.2419	1.589e-07
Volume	Liver	22506	Tobacco smoking: Never smoked	Online follow-up	-0.3034	0.058	-5.2345	1.6546e-07
Volume	Liver	1970	Nervous feelings	Medical history	-0.2114	0.0405	-5.2185	1.8042e-07
Volume	Liver	30120	Lymphocyte count	Biological samples	0.1643	0.0315	5.2093	1.8955e-07
Volume	Liver	6177	NA	Medical history	0.2295	0.0443	5.1761	2.2655e-07
Volume	Liver	1100	Drive faster than motorway speed limit	Lifestyle and History	0.1988	0.0384	5.1703	2.3373e-07
Volume	Liver	30620	Alanine aminotransferase (U/L)	Biological samples	0.2256	0.0436	5.1685	2.3603e-07
Volume	Liver	1458	Cereal intake	Lifestyle and History	-0.2388	0.0465	-5.1394	2.7563e-07
Volume	Liver	46	Hand grip strength (left)	Physical Measures	0.1963	0.039	5.0289	4.9339e-07
Volume	Liver	30890	Vitamin D (nmol/L)	Biological samples	-0.1851	0.0373	-4.9583	7.1113e-07
Volume	Liver	47	Hand grip strength (right)	Physical Measures	0.189	0.0388	4.8728	1.1e-06
Volume	Liver	1249	Past tobacco smoking	Lifestyle and History	-0.1862	0.0387	-4.8104	1.5064e-06
Volume	Liver	1190	Nap during day	Medical history	0.1765	0.0368	4.7999	1.5877e-06
Volume	Liver	20160	Ever smoked	Lifestyle and History	0.178	0.0371	4.7955	1.6228e-06
Volume	Liver	6153	NA	Medical history	-0.2496	0.0535	-4.6674	3.05e-06
Volume	Liver	20441	Ever had prolonged loss of interest in normal activities	Online follow-up	0.2388	0.0515	4.6329	3.6057e-06
Volume	Liver	400	Time to complete round	Physical Measures	-0.1694	0.0366	-4.6308	3.6429e-06
Volume	Liver	2385	NA	Lifestyle and History	-0.2525	0.0545	-4.6304	3.6489e-06
Volume	Liver	22506	Tobacco smoking: Ex-smoker	Online follow-up	0.2906	0.0628	4.6271	3.7077e-06
Volume	Liver	30000	White blood cell (leukocyte) count	Biological samples	0.1541	0.0335	4.6022	4.1806e-06
Volume	Liver	2090	Seen doctor (GP) for nerves, anxiety, tension or depression	Medical history	0.1955	0.0426	4.5894	4.4443e-06
Volume	Liver	20536	Weight change during worst episode of depression: Stayed about the same or was on a diet	Online follow-up	-0.3209	0.0704	-4.5605	5.1036e-06
Volume	Liver	30740	Glucose (mmol/L)	Biological samples	0.2422	0.0532	4.5572	5.185e-06
Volume	Liver	20519	Recent feelings of tiredness or low energy	Online follow-up	0.2507	0.0559	4.4858	7.2655e-06
Volume	Liver	5132	3mm strong meridian (right)	NA	-0.1615	0.0368	-4.3861	1.1539e-05
Volume	Liver	845	Age completed full time education	Lifestyle and History	-0.1699	0.0387	-4.3843	1.1634e-05
Volume	Liver	2887	Number of cigarettes previously smoked daily	Lifestyle and History	0.2517	0.0581	4.3302	1.4895e-05
Volume	Liver	1070	Time spent watching television (TV)	Lifestyle and History	0.1698	0.0394	4.3143	1.6008e-05
Volume	Pancreas	50	Standing height	Physical Measures	0.1797	0.035	5.129	2.9126e-07
Volume	Pancreas	23129	Trunk fat-free mass	Physical Measures	0.1876	0.0378	4.958	7.1217e-07
Volume	Pancreas	23130	Trunk predicted mass	Physical Measures	0.1879	0.038	4.9468	7.5442e-07
Volume	Pancreas	20015	Sitting height	Physical Measures	0.1769	0.0359	4.9217	8.579e-07
Volume	Pancreas	23122	Arm predicted mass (right)	Physical Measures	0.1876	0.0386	4.8566	1.1941e-06
Volume	Pancreas	23101	Whole body fat-free mass	Physical Measures	0.1821	0.0378	4.8185	1.4465e-06
Volume	Pancreas	23121	Arm fat-free mass (right)	Physical Measures	0.1846	0.0385	4.7982	1.6011e-06
Volume	Pancreas	23102	Whole body water mass	Physical Measures	0.1818	0.0379	4.7947	1.6295e-06
Volume	Pancreas	23126	Arm predicted mass (left)	Physical Measures	0.1786	0.0384	4.6468	3.3708e-06
Volume	Pancreas	23105	Basal metabolic rate	Physical Measures	0.1717	0.0373	4.6047	4.1306e-06
Volume	Pancreas	23125	Arm fat-free mass (left)	Physical Measures	0.1745	0.0385	4.5317	5.8523e-06
Volume	Pancreas	23113	Leg fat-free mass (right)	Physical Measures	0.1655	0.0379	4.3625	1.2857e-05
Volume	Pancreas	23114	Leg predicted mass (right)	Physical Measures	0.1652	0.038	4.3539	1.3372e-05
Volume	Pancreas	23118	Leg predicted mass (left)	Physical Measures	0.1608	0.037	4.3496	1.3638e-05
Volume	Kidney	21002	Weight	Physical Measures	0.562	0.0272	20.631	1.445e-94
Volume	Kidney	23105	Basal metabolic rate	Physical Measures	0.5875	0.0286	20.5524	7.3188e-94
Volume	Kidney	23098	Weight	Physical Measures	0.5629	0.0275	20.4508	5.9067e-93
Volume	Kidney	23117	Leg fat-free mass (left)	Physical Measures	0.5653	0.0283	19.9578	1.2829e-88
Volume	Kidney	23118	Leg predicted mass (left)	Physical Measures	0.5678	0.0285	19.9346	2.0402e-88
Volume	Kidney	23122	Arm predicted mass (right)	Physical Measures	0.5849	0.0294	19.8621	8.6627e-88
Volume	Kidney	23125	Arm fat-free mass (left)	Physical Measures	0.5903	0.0297	19.8452	1.2122e-87
Volume	Kidney	23126	Arm predicted mass (left)	Physical Measures	0.5913	0.0298	19.8291	1.6698e-87
Volume	Kidney	23101	Whole body fat-free mass	Physical Measures	0.5775	0.0291	19.8164	2.1474e-87
Volume	Kidney	23102	Whole body water mass	Physical Measures	0.5776	0.0292	19.782	4.2585e-87
Volume	Kidney	23121	Arm fat-free mass (right)	Physical Measures	0.5827	0.0295	19.7309	1.1708e-86
Volume	Kidney	23113	Leg fat-free mass (right)	Physical Measures	0.5574	0.0289	19.2817	7.6573e-83
Volume	Kidney	23114	Leg predicted mass (right)	Physical Measures	0.5569	0.029	19.204	3.4261e-82
Volume	Kidney	23130	Trunk predicted mass	Physical Measures	0.5709	0.0298	19.1428	1.1105e-81
Volume	Kidney	23129	Trunk fat-free mass	Physical Measures	0.5687	0.0298	19.0718	4.3342e-81
Volume	Kidney	49	Hip circumference	Physical Measures	0.492	0.0282	17.4436	3.8475e-68
Volume	Kidney	48	Waist circumference	Physical Measures	0.4692	0.028	16.727	8.3387e-63
Volume	Kidney	23128	Trunk fat mass	Physical Measures	0.4577	0.0282	16.2351	2.8474e-59
Volume	Kidney	23100	Whole body fat mass	Physical Measures	0.4602	0.0285	16.1584	9.9104e-59
Volume	Kidney	23112	Leg fat mass (right)	Physical Measures	0.456	0.0289	15.7905	3.6183e-56
Volume	Kidney	23116	Leg fat mass (left)	Physical Measures	0.4558	0.0291	15.6815	2.0248e-55
Volume	Kidney	23120	Arm fat mass (right)	Physical Measures	0.4595	0.0293	15.6762	2.2011e-55
Volume	Kidney	23124	Arm fat mass (left)	Physical Measures	0.4596	0.0294	15.608	6.4239e-55
Volume	Kidney	3143	Ankle spacing width	Physical Measures	0.416	0.0315	13.1909	9.8935e-40
Volume	Kidney	1697	Comparative height size at age 10	Lifestyle and History	0.4039	0.0331	12.1928	3.3959e-34
Volume	Kidney	21001	Body mass index (BMI)	Physical Measures	0.3842	0.0316	12.1471	5.9408e-34
Volume	Kidney	23104	Body mass index (BMI)	Physical Measures	0.3841	0.0319	12.0421	2.1357e-33
Volume	Kidney	20015	Sitting height	Physical Measures	0.4009	0.0336	11.9157	9.8089e-33
Volume	Kidney	4100	Ankle spacing width (left)	Physical Measures	0.4135	0.038	10.8921	1.2565e-27
Volume	Kidney	50	Standing height	Physical Measures	0.3667	0.0339	10.8121	3.0179e-27
Volume	Kidney	23106	Impedance of whole body	Physical Measures	-0.352	0.0327	-10.7631	5.1427e-27
Volume	Kidney	23127	Trunk fat percentage	Physical Measures	0.3257	0.0311	10.4879	9.8142e-26
Volume	Kidney	4119	Ankle spacing width (right)	Physical Measures	0.3981	0.0381	10.4449	1.5463e-25
Volume	Kidney	23110	Impedance of arm (left)	Physical Measures	-0.3266	0.0317	-10.2998	7.0635e-25
Volume	Kidney	23109	Impedance of arm (right)	Physical Measures	-0.3231	0.0322	-10.031	1.1133e-23
Volume	Kidney	23099	Body fat percentage	Physical Measures	0.3125	0.0319	9.7894	1.25e-22
Volume	Kidney	30700	Creatinine (umol/L)	Biological samples	-0.3954	0.0409	-9.6726	3.942e-22
Volume	Kidney	23108	Impedance of leg (left)	Physical Measures	-0.3253	0.0344	-9.4645	2.9495e-21
Volume	Kidney	23119	Arm fat percentage (right)	Physical Measures	0.3081	0.0329	9.3585	8.0885e-21
Volume	Kidney	23107	Impedance of leg (right)	Physical Measures	-0.3182	0.0343	-9.2718	1.8295e-20
Volume	Kidney	23123	Arm fat percentage (left)	Physical Measures	0.3074	0.0333	9.2312	2.6766e-20
Volume	Kidney	23111	Leg fat percentage (right)	Physical Measures	0.2985	0.0329	9.0823	1.0635e-19
Volume	Kidney	23115	Leg fat percentage (left)	Physical Measures	0.2977	0.0334	8.9241	4.4938e-19
Volume	Kidney	20153	Forced expiratory volume in 1-second (FEV1), predicted	Physical Measures	0.3308	0.0426	7.7607	8.4458e-15
Volume	Kidney	2178	Overall health rating	Medical history	0.2799	0.0375	7.47	8.0214e-14
Volume	Kidney	47	Hand grip strength (right)	Physical Measures	0.2222	0.0356	6.236	4.4883e-10
Volume	Kidney	20116	Smoking status: Never	Lifestyle and History	-0.2251	0.0367	-6.1276	8.9232e-10
Volume	Kidney	46	Hand grip strength (left)	Physical Measures	0.2136	0.0354	6.0297	1.6425e-09
Volume	Kidney	100010	Portion size	Online follow-up	0.5451	0.0904	6.0296	1.6432e-09
Volume	Kidney	2316	Wheeze or whistling in the chest in last year	Medical history	0.2494	0.0419	5.9588	2.5405e-09
Volume	Kidney	20022	Birth weight	Lifestyle and History	0.2688	0.0477	5.634	1.7608e-08
Volume	Kidney	137	Number of treatments/medications taken	Medical history	0.2824	0.0507	5.5734	2.4981e-08
Volume	Kidney	6150	Vascular/heart problems diagnosed by doctor: None of the above	Medical history	-0.2236	0.0411	-5.4359	5.4527e-08
Volume	Kidney	6150	Vascular/heart problems diagnosed by doctor: High blood pressure	Medical history	0.225	0.0422	5.3266	1.0004e-07
Volume	Kidney	20160	Ever smoked	Lifestyle and History	0.193	0.0363	5.3113	1.0884e-07
Volume	Kidney	1249	Past tobacco smoking	Lifestyle and History	-0.1923	0.0369	-5.2138	1.8504e-07
Volume	Kidney	6154	Medication for pain relief, constipation, heartburn: None of the above	Medical history	-0.2035	0.0393	-5.1811	2.2054e-07
Volume	Kidney	135	Number of self-reported non-cancer illnesses	Medical history	0.2447	0.0474	5.1619	2.4445e-07
Volume	Kidney	2139	Age first had sexual intercourse	Lifestyle and History	-0.1935	0.0389	-4.9756	6.5038e-07
Volume	Kidney	2744	NA	Lifestyle and History	0.2239	0.0453	4.9436	7.6692e-07
Volume	Kidney	1239	Current tobacco smoking	Lifestyle and History	0.2283	0.0464	4.9181	8.7381e-07
Volume	Kidney	30740	Glucose (mmol/L)	Biological samples	0.2274	0.0463	4.9099	9.1116e-07
Volume	Kidney	30850	Testosterone (nmol/L)	Biological samples	-0.1734	0.0367	-4.7199	2.3593e-06
Volume	Kidney	4548	Health satisfaction	Medical history	0.2529	0.0541	4.6748	2.943e-06
Volume	Kidney	6177	NA	Medical history	0.2143	0.0471	4.5484	5.4063e-06
Volume	Kidney	2080	Frequency of tiredness / lethargy in last 2 weeks	Medical history	0.1901	0.0424	4.4851	7.2891e-06
Volume	Kidney	2149	Lifetime number of sexual partners	Lifestyle and History	0.1825	0.0412	4.4316	9.3522e-06
Volume	Kidney	2090	Seen doctor (GP) for nerves, anxiety, tension or depression	Medical history	0.2054	0.0464	4.4269	9.5599e-06
Volume	Spleen	21002	Weight	Physical Measures	0.4033	0.0525	7.6863	1.5144e-14
Volume	Spleen	23098	Weight	Physical Measures	0.4015	0.0523	7.6715	1.6993e-14
Volume	Spleen	23128	Trunk fat mass	Physical Measures	0.3393	0.0442	7.6676	1.7522e-14
Volume	Spleen	48	Waist circumference	Physical Measures	0.359	0.0476	7.5397	4.71e-14
Volume	Spleen	4100	Ankle spacing width (left)	Physical Measures	0.3181	0.0424	7.5104	5.8951e-14
Volume	Spleen	23117	Leg fat-free mass (left)	Physical Measures	0.3948	0.053	7.4458	9.6367e-14
Volume	Spleen	23118	Leg predicted mass (left)	Physical Measures	0.3962	0.0532	7.4432	9.8307e-14
Volume	Spleen	23100	Whole body fat mass	Physical Measures	0.3385	0.0456	7.4205	1.167e-13
Volume	Spleen	23124	Arm fat mass (left)	Physical Measures	0.339	0.0459	7.3912	1.4546e-13
Volume	Spleen	4119	Ankle spacing width (right)	Physical Measures	0.3058	0.0414	7.3901	1.4673e-13
Volume	Spleen	23113	Leg fat-free mass (right)	Physical Measures	0.383	0.0521	7.3479	2.0132e-13
Volume	Spleen	23114	Leg predicted mass (right)	Physical Measures	0.3828	0.0521	7.347	2.0269e-13
Volume	Spleen	23120	Arm fat mass (right)	Physical Measures	0.3396	0.0462	7.3431	2.0868e-13
Volume	Spleen	23105	Basal metabolic rate	Physical Measures	0.4039	0.0554	7.2939	3.0103e-13
Volume	Spleen	23126	Arm predicted mass (left)	Physical Measures	0.4063	0.0566	7.1824	6.8484e-13
Volume	Spleen	23101	Whole body fat-free mass	Physical Measures	0.3916	0.0549	7.1313	9.9431e-13
Volume	Spleen	23121	Arm fat-free mass (right)	Physical Measures	0.3935	0.0552	7.1271	1.0249e-12
Volume	Spleen	23116	Leg fat mass (left)	Physical Measures	0.3296	0.0463	7.1201	1.0789e-12
Volume	Spleen	23102	Whole body water mass	Physical Measures	0.3914	0.055	7.1148	1.1205e-12
Volume	Spleen	23112	Leg fat mass (right)	Physical Measures	0.3315	0.0467	7.0937	1.3061e-12
Volume	Spleen	23122	Arm predicted mass (right)	Physical Measures	0.3942	0.0556	7.0906	1.3357e-12
Volume	Spleen	23125	Arm fat-free mass (left)	Physical Measures	0.4057	0.0576	7.0489	1.8039e-12
Volume	Spleen	23129	Trunk fat-free mass	Physical Measures	0.3817	0.0553	6.8975	5.2928e-12
Volume	Spleen	23130	Trunk predicted mass	Physical Measures	0.3813	0.0553	6.8935	5.4435e-12
Volume	Spleen	23127	Trunk fat percentage	Physical Measures	0.2522	0.0371	6.8002	1.0446e-11
Volume	Spleen	49	Hip circumference	Physical Measures	0.337	0.0512	6.5856	4.5294e-11
Volume	Spleen	23104	Body mass index (BMI)	Physical Measures	0.2897	0.0444	6.5304	6.5602e-11
Volume	Spleen	21001	Body mass index (BMI)	Physical Measures	0.29	0.0445	6.5116	7.436e-11
Volume	Spleen	3143	Ankle spacing width	Physical Measures	0.3064	0.0473	6.4739	9.5492e-11
Volume	Spleen	23099	Body fat percentage	Physical Measures	0.2426	0.0378	6.4156	1.4027e-10
Volume	Spleen	23119	Arm fat percentage (right)	Physical Measures	0.247	0.0386	6.3965	1.5899e-10
Volume	Spleen	20015	Sitting height	Physical Measures	0.2312	0.0362	6.3939	1.6173e-10
Volume	Spleen	23123	Arm fat percentage (left)	Physical Measures	0.2422	0.0383	6.3226	2.5727e-10
Volume	Spleen	50	Standing height	Physical Measures	0.2347	0.0399	5.8827	4.0364e-09
Volume	Spleen	23108	Impedance of leg (left)	Physical Measures	-0.2463	0.0429	-5.7386	9.545e-09
Volume	Spleen	23111	Leg fat percentage (right)	Physical Measures	0.2275	0.0401	5.6699	1.4291e-08
Volume	Spleen	23115	Leg fat percentage (left)	Physical Measures	0.2216	0.0397	5.5809	2.3923e-08
Volume	Spleen	1697	Comparative height size at age 10	Lifestyle and History	0.2669	0.0479	5.5694	2.5557e-08
Volume	Spleen	30750	Glycated haemoglobin (mmol/mol)	Biological samples	-0.2386	0.0436	-5.4707	4.4836e-08
Volume	Spleen	23106	Impedance of whole body	Physical Measures	-0.2502	0.0459	-5.448	5.0941e-08
Volume	Spleen	23107	Impedance of leg (right)	Physical Measures	-0.2273	0.0419	-5.4278	5.7049e-08
Volume	Spleen	30010	Red blood cell (erythrocyte) count	Biological samples	0.2185	0.0406	5.3757	7.6286e-08
Volume	Spleen	20153	Forced expiratory volume in 1-second (FEV1), predicted	Physical Measures	0.2306	0.0453	5.0959	3.4707e-07
Volume	Spleen	30060	Mean corpuscular haemoglobin concentration	Biological samples	0.2644	0.0525	5.0365	4.741e-07
Volume	Spleen	23109	Impedance of arm (right)	Physical Measures	-0.2184	0.0441	-4.9507	7.3932e-07
Volume	Spleen	23110	Impedance of arm (left)	Physical Measures	-0.2288	0.0465	-4.9207	8.6225e-07
Volume	Spleen	2178	Overall health rating	Medical history	0.2023	0.0433	4.6731	2.967e-06
Volume	Spleen	30620	Alanine aminotransferase (U/L)	Biological samples	0.215	0.0472	4.5537	5.2709e-06
Volume	Spleen	30690	Cholesterol (mmol/L)	Biological samples	-0.2766	0.0615	-4.4955	6.9399e-06
Volume	Lungs	20015	Sitting height	Physical Measures	0.6581	0.0363	18.117	2.3407e-73
Volume	Lungs	20151	Forced vital capacity (FVC), Best measure	Physical Measures	0.7042	0.0395	17.846	3.1055e-71
Volume	Lungs	3062	Forced vital capacity (FVC)	Physical Measures	0.6854	0.0403	17.0251	5.3475e-65
Volume	Lungs	50	Standing height	Physical Measures	0.6369	0.0381	16.7301	7.9138e-63
Volume	Lungs	1697	Comparative height size at age 10	Lifestyle and History	0.5729	0.0374	15.3307	4.7675e-53
Volume	Lungs	20153	Forced expiratory volume in 1-second (FEV1), predicted	Physical Measures	0.6447	0.0424	15.1984	3.6245e-52
Volume	Lungs	23111	Leg fat percentage (right)	Physical Measures	-0.4075	0.0316	-12.9018	4.3992e-38
Volume	Lungs	23115	Leg fat percentage (left)	Physical Measures	-0.4056	0.0319	-12.71	5.2049e-37
Volume	Lungs	46	Hand grip strength (left)	Physical Measures	0.4152	0.038	10.9282	8.4554e-28
Volume	Lungs	20150	Forced expiratory volume in 1-second (FEV1), Best measure	Physical Measures	0.4673	0.043	10.8602	1.7842e-27
Volume	Lungs	3063	Forced expiratory volume in 1-second (FEV1)	Physical Measures	0.4689	0.0432	10.8556	1.876e-27
Volume	Lungs	23130	Trunk predicted mass	Physical Measures	0.4015	0.0373	10.7766	4.4375e-27
Volume	Lungs	23129	Trunk fat-free mass	Physical Measures	0.4013	0.0373	10.7668	4.9368e-27
Volume	Lungs	23123	Arm fat percentage (left)	Physical Measures	-0.3605	0.0344	-10.4927	9.3318e-26
Volume	Lungs	23119	Arm fat percentage (right)	Physical Measures	-0.3568	0.0341	-10.4571	1.3594e-25
Volume	Lungs	47	Hand grip strength (right)	Physical Measures	0.4023	0.0411	9.7813	1.3541e-22
Volume	Lungs	23099	Body fat percentage	Physical Measures	-0.3165	0.0324	-9.7651	1.5896e-22
Volume	Lungs	21001	Body mass index (BMI)	Physical Measures	-0.3209	0.0345	-9.2986	1.4231e-20
Volume	Lungs	23104	Body mass index (BMI)	Physical Measures	-0.3231	0.0348	-9.2728	1.8139e-20
Volume	Lungs	23101	Whole body fat-free mass	Physical Measures	0.3451	0.0374	9.2273	2.7766e-20
Volume	Lungs	23102	Whole body water mass	Physical Measures	0.3435	0.0376	9.1457	5.9226e-20
Volume	Lungs	1070	Time spent watching television (TV)	Lifestyle and History	-0.3221	0.0385	-8.3678	5.868e-17
Volume	Lungs	23121	Arm fat-free mass (right)	Physical Measures	0.3004	0.0371	8.0928	5.833e-16
Volume	Lungs	23122	Arm predicted mass (right)	Physical Measures	0.2963	0.0373	7.9419	1.9905e-15
Volume	Lungs	23125	Arm fat-free mass (left)	Physical Measures	0.288	0.0375	7.6775	1.6218e-14
Volume	Lungs	23105	Basal metabolic rate	Physical Measures	0.2855	0.0377	7.5721	3.6727e-14
Volume	Lungs	23114	Leg predicted mass (right)	Physical Measures	0.286	0.0379	7.5461	4.4862e-14
Volume	Lungs	23113	Leg fat-free mass (right)	Physical Measures	0.2862	0.038	7.5309	5.0385e-14
Volume	Lungs	23126	Arm predicted mass (left)	Physical Measures	0.2811	0.0374	7.5244	5.295e-14
Volume	Lungs	23127	Trunk fat percentage	Physical Measures	-0.2462	0.0335	-7.3388	2.1551e-13
Volume	Lungs	6138	Qualifications: College or University degree	Lifestyle and History	0.2367	0.0337	7.0218	2.1909e-12
Volume	Lungs	924	Usual walking pace	Lifestyle and History	0.2885	0.0413	6.9851	2.8463e-12
Volume	Lungs	23118	Leg predicted mass (left)	Physical Measures	0.2603	0.0383	6.7945	1.0871e-11
Volume	Lungs	23117	Leg fat-free mass (left)	Physical Measures	0.2591	0.0384	6.7498	1.4801e-11
Volume	Lungs	6154	Medication for pain relief, constipation, heartburn: None of the above	Medical history	0.2615	0.0396	6.6066	3.9334e-11
Volume	Lungs	1319	Dried fruit intake	Lifestyle and History	0.2585	0.0404	6.3981	1.5733e-10
Volume	Lungs	20022	Birth weight	Lifestyle and History	0.2786	0.0436	6.3964	1.5908e-10
Volume	Lungs	23112	Leg fat mass (right)	Physical Measures	-0.2115	0.0335	-6.3141	2.7177e-10
Volume	Lungs	6138	Qualifications: A levels/AS levels or equivalent	Lifestyle and History	0.2305	0.0366	6.2919	3.1355e-10
Volume	Lungs	23116	Leg fat mass (left)	Physical Measures	-0.2071	0.0334	-6.1929	5.9052e-10
Volume	Lungs	48	Waist circumference	Physical Measures	-0.1928	0.0321	-6.0028	1.9394e-09
Volume	Lungs	6138	Qualifications: None of the above	Lifestyle and History	-0.2092	0.0352	-5.9357	2.9265e-09
Volume	Lungs	30530	Sodium in urine	Biological samples	-0.249	0.0432	-5.765	8.1677e-09
Volume	Lungs	6032	Maximum workload during fitness test	Physical Measures	0.469	0.0849	5.5234	3.325e-08
Volume	Lungs	23124	Arm fat mass (left)	Physical Measures	-0.1834	0.0352	-5.2116	1.8719e-07
Volume	Lungs	23120	Arm fat mass (right)	Physical Measures	-0.1825	0.0353	-5.1737	2.2953e-07
Volume	Lungs	2178	Overall health rating	Medical history	-0.1992	0.0392	-5.0782	3.8098e-07
Volume	Lungs	1458	Cereal intake	Lifestyle and History	0.2232	0.0446	5.0045	5.5994e-07
Volume	Lungs	2744	NA	Lifestyle and History	0.2239	0.0452	4.9571	7.1536e-07
Volume	Lungs	1568	Average weekly red wine intake	Lifestyle and History	0.235	0.0479	4.9045	9.3673e-07
Volume	Lungs	845	Age completed full time education	Lifestyle and History	0.186	0.0389	4.783	1.7266e-06
Volume	Lungs	2764	Age at last live birth	Lifestyle and History	0.286	0.0608	4.7025	2.5694e-06
Volume	Lungs	2754	Age at first live birth	Lifestyle and History	0.2228	0.0474	4.697	2.6403e-06
Volume	Lungs	30280	Immature reticulocyte fraction	Biological samples	-0.1659	0.0358	-4.6308	3.6421e-06
Volume	Lungs	1210	Snoring	Medical history	0.1833	0.0415	4.4135	1.0171e-05
Volume	Lungs	30000	White blood cell (leukocyte) count	Biological samples	-0.1534	0.0351	-4.3703	1.2407e-05
Volume	Lungs	5983	ECG, heart rate	Physical Measures	-0.3354	0.0772	-4.3479	1.3742e-05
Volume	Lungs	1508	Coffee type: Ground coffee (include espresso, filter etc)	Lifestyle and History	0.1969	0.0456	4.3197	1.5622e-05
Volume	ASAT	23100	Whole body fat mass	Physical Measures	0.9441	0.0371	25.4816	3.1516e-143
Volume	ASAT	23128	Trunk fat mass	Physical Measures	0.9341	0.0368	25.3693	5.4997e-142
Volume	ASAT	23112	Leg fat mass (right)	Physical Measures	0.9498	0.0375	25.3504	8.8974e-142
Volume	ASAT	23099	Body fat percentage	Physical Measures	0.9338	0.0369	25.3273	1.5998e-141
Volume	ASAT	23116	Leg fat mass (left)	Physical Measures	0.9452	0.0374	25.2853	4.6394e-141
Volume	ASAT	23120	Arm fat mass (right)	Physical Measures	0.9298	0.0369	25.2156	2.701e-140
Volume	ASAT	23124	Arm fat mass (left)	Physical Measures	0.9301	0.037	25.1136	3.5352e-139
Volume	ASAT	23127	Trunk fat percentage	Physical Measures	0.9194	0.0367	25.0795	8.3146e-139
Volume	ASAT	23123	Arm fat percentage (left)	Physical Measures	0.9105	0.0366	24.9024	7.0084e-137
Volume	ASAT	48	Waist circumference	Physical Measures	0.9143	0.0367	24.8822	1.1596e-136
Volume	ASAT	23119	Arm fat percentage (right)	Physical Measures	0.9088	0.037	24.5799	2.071e-133
Volume	ASAT	23111	Leg fat percentage (right)	Physical Measures	0.9127	0.0374	24.4267	8.9022e-132
Volume	ASAT	23115	Leg fat percentage (left)	Physical Measures	0.9119	0.0374	24.3697	3.5886e-131
Volume	ASAT	49	Hip circumference	Physical Measures	0.877	0.0363	24.1335	1.1118e-128
Volume	ASAT	21001	Body mass index (BMI)	Physical Measures	0.872	0.0373	23.3771	7.316e-121
Volume	ASAT	23104	Body mass index (BMI)	Physical Measures	0.8731	0.0374	23.3245	2.5011e-120
Volume	ASAT	21002	Weight	Physical Measures	0.8338	0.0362	23.0654	1.0299e-117
Volume	ASAT	23098	Weight	Physical Measures	0.8331	0.0364	22.9084	3.8292e-116
Volume	ASAT	23118	Leg predicted mass (left)	Physical Measures	0.6157	0.0359	17.1636	4.9739e-66
Volume	ASAT	23117	Leg fat-free mass (left)	Physical Measures	0.6155	0.036	17.0936	1.6559e-65
Volume	ASAT	23105	Basal metabolic rate	Physical Measures	0.605	0.036	16.795	2.6563e-63
Volume	ASAT	23126	Arm predicted mass (left)	Physical Measures	0.583	0.0364	15.9964	1.3536e-57
Volume	ASAT	23125	Arm fat-free mass (left)	Physical Measures	0.5782	0.0365	15.8445	1.5332e-56
Volume	ASAT	23114	Leg predicted mass (right)	Physical Measures	0.5682	0.0361	15.7214	1.0785e-55
Volume	ASAT	23113	Leg fat-free mass (right)	Physical Measures	0.5682	0.0362	15.7029	1.4455e-55
Volume	ASAT	23121	Arm fat-free mass (right)	Physical Measures	0.5406	0.0357	15.1393	8.9224e-52
Volume	ASAT	23122	Arm predicted mass (right)	Physical Measures	0.5444	0.0361	15.0974	1.6853e-51
Volume	ASAT	924	Usual walking pace	Lifestyle and History	-0.5739	0.0401	-14.2998	2.1946e-46
Volume	ASAT	23102	Whole body water mass	Physical Measures	0.5087	0.036	14.1163	3.0137e-45
Volume	ASAT	23101	Whole body fat-free mass	Physical Measures	0.5073	0.036	14.0943	4.1172e-45
Volume	ASAT	2178	Overall health rating	Medical history	0.5577	0.0413	13.5114	1.3396e-41
Volume	ASAT	3143	Ankle spacing width	Physical Measures	0.4959	0.037	13.3896	6.9538e-41
Volume	ASAT	23130	Trunk predicted mass	Physical Measures	0.4173	0.0356	11.7199	1.0075e-31
Volume	ASAT	23129	Trunk fat-free mass	Physical Measures	0.4167	0.0356	11.7099	1.1342e-31
Volume	ASAT	4100	Ankle spacing width (left)	Physical Measures	0.4945	0.0442	11.1825	4.969e-29
Volume	ASAT	6154	Medication for pain relief, constipation, heartburn: None of the above	Medical history	-0.4322	0.0394	-10.9794	4.8027e-28
Volume	ASAT	4119	Ankle spacing width (right)	Physical Measures	0.4693	0.0434	10.8119	3.0237e-27
Volume	ASAT	6150	Vascular/heart problems diagnosed by doctor: None of the above	Medical history	-0.4107	0.038	-10.8047	3.2719e-27
Volume	ASAT	1070	Time spent watching television (TV)	Lifestyle and History	0.4336	0.0416	10.412	2.1848e-25
Volume	ASAT	6150	Vascular/heart problems diagnosed by doctor: High blood pressure	Medical history	0.389	0.0374	10.3927	2.6778e-25
Volume	ASAT	2316	Wheeze or whistling in the chest in last year	Medical history	0.4385	0.0455	9.6336	5.7657e-22
Volume	ASAT	6138	Qualifications: College or University degree	Lifestyle and History	-0.3175	0.0348	-9.1234	7.2782e-20
Volume	ASAT	1687	Comparative body size at age 10	Lifestyle and History	0.3792	0.0417	9.088	1.0088e-19
Volume	ASAT	137	Number of treatments/medications taken	Medical history	0.5052	0.0574	8.7973	1.4019e-18
Volume	ASAT	30510	Creatinine (enzymatic) in urine	Biological samples	0.3577	0.0409	8.7393	2.3463e-18
Volume	ASAT	4079	Diastolic blood pressure, automated reading	Physical Measures	0.3094	0.0354	8.7386	2.3605e-18
Volume	ASAT	135	Number of self-reported non-cancer illnesses	Medical history	0.4817	0.0551	8.7336	2.4662e-18
Volume	ASAT	4548	Health satisfaction	Medical history	0.4661	0.0534	8.7209	2.761e-18
Volume	ASAT	23108	Impedance of leg (left)	Physical Measures	-0.3561	0.0419	-8.5056	1.8069e-17
Volume	ASAT	2754	Age at first live birth	Lifestyle and History	-0.341	0.0403	-8.4567	2.7504e-17
Volume	ASAT	30280	Immature reticulocyte fraction	Biological samples	0.3387	0.0401	8.4374	3.2442e-17
Volume	ASAT	6177	NA	Medical history	0.3905	0.0465	8.4024	4.3758e-17
Volume	ASAT	30530	Sodium in urine	Biological samples	0.3758	0.0447	8.4017	4.4003e-17
Volume	ASAT	23106	Impedance of whole body	Physical Measures	-0.3599	0.0429	-8.3985	4.5215e-17
Volume	ASAT	2080	Frequency of tiredness / lethargy in last 2 weeks	Medical history	0.3758	0.0452	8.3065	9.8547e-17
Volume	ASAT	6177	NA	Medical history	-0.4099	0.0495	-8.2754	1.2801e-16
Volume	ASAT	23107	Impedance of leg (right)	Physical Measures	-0.3419	0.0414	-8.2558	1.5088e-16
Volume	ASAT	20536	Weight change during worst episode of depression: Stayed about the same or was on a diet	Online follow-up	-0.6012	0.0743	-8.0934	5.8042e-16
Volume	ASAT	6153	NA	Medical history	0.3575	0.0448	7.9861	1.3923e-15
Volume	ASAT	6138	Qualifications: A levels/AS levels or equivalent	Lifestyle and History	-0.324	0.041	-7.8992	2.8078e-15
Volume	ASAT	2139	Age first had sexual intercourse	Lifestyle and History	-0.2686	0.0347	-7.7434	9.6768e-15
Volume	ASAT	23109	Impedance of arm (right)	Physical Measures	-0.3199	0.0415	-7.7092	1.2664e-14
Volume	ASAT	23110	Impedance of arm (left)	Physical Measures	-0.3277	0.0427	-7.6709	1.7077e-14
Volume	ASAT	20459	General happiness with own health	Online follow-up	0.4518	0.0594	7.6081	2.7818e-14
Volume	ASAT	6138	Qualifications: None of the above	Lifestyle and History	0.2679	0.0367	7.2972	2.9387e-13
Volume	ASAT	1210	Snoring	Medical history	-0.3319	0.0457	-7.2687	3.6309e-13
Volume	ASAT	2764	Age at last live birth	Lifestyle and History	-0.3549	0.0491	-7.2287	4.8773e-13
Volume	ASAT	30620	Alanine aminotransferase (U/L)	Biological samples	0.318	0.0442	7.1903	6.4654e-13
Volume	ASAT	2237	Plays computer games	Lifestyle and History	0.2796	0.04	6.9816	2.9187e-12
Volume	ASAT	845	Age completed full time education	Lifestyle and History	-0.2903	0.042	-6.9148	4.6857e-12
Volume	ASAT	6153	NA	Medical history	-0.3424	0.0502	-6.8176	9.2576e-12
Volume	ASAT	20151	Forced vital capacity (FVC), Best measure	Physical Measures	-0.2467	0.0364	-6.7804	1.1987e-11
Volume	ASAT	1920	Mood swings	Medical history	0.2768	0.0414	6.6914	2.2103e-11
Volume	ASAT	3062	Forced vital capacity (FVC)	Physical Measures	-0.2414	0.0366	-6.5902	4.3924e-11
Volume	ASAT	1458	Cereal intake	Lifestyle and History	-0.3071	0.0481	-6.384	1.7251e-10
Volume	ASAT	1960	Fed-up feelings	Medical history	0.2514	0.0399	6.2994	2.9873e-10
Volume	ASAT	1618	Alcohol usually taken with meals	Lifestyle and History	-0.2581	0.0411	-6.2824	3.3345e-10
Volume	ASAT	400	Time to complete round	Physical Measures	-0.2176	0.0347	-6.2785	3.4176e-10
Volume	ASAT	20519	Recent feelings of tiredness or low energy	Online follow-up	0.3711	0.0602	6.165	7.0484e-10
Volume	ASAT	6149	Mouth/teeth dental problems: Dentures	Medical history	0.2966	0.0483	6.1443	8.0333e-10
Volume	ASAT	1508	Coffee type: Ground coffee (include espresso, filter etc)	Lifestyle and History	-0.2547	0.0415	-6.1428	8.1073e-10
Volume	ASAT	6177	NA	Medical history	0.348	0.0573	6.076	1.2323e-09
Volume	ASAT	1239	Current tobacco smoking	Lifestyle and History	0.2981	0.0497	6.0023	1.9453e-09
Volume	ASAT	30770	IGF-1 (nmol/L)	Biological samples	-0.1907	0.032	-5.9597	2.5273e-09
Volume	ASAT	1050	Time spend outdoors in summer	Lifestyle and History	0.2504	0.0422	5.9281	3.0644e-09
Volume	ASAT	1319	Dried fruit intake	Lifestyle and History	-0.2456	0.0428	-5.7313	9.9676e-09
Volume	ASAT	22501	Year ended full time education	Online follow-up	-0.3024	0.0528	-5.7274	1.0197e-08
Volume	ASAT	2887	Number of cigarettes previously smoked daily	Lifestyle and History	0.3512	0.0625	5.6208	1.9006e-08
Volume	ASAT	816	Job involves heavy manual or physical work	Lifestyle and History	0.272	0.0492	5.522	3.3508e-08
Volume	ASAT	1930	Miserableness	Medical history	0.2342	0.043	5.4457	5.1606e-08
Volume	ASAT	4080	Systolic blood pressure, automated reading	Physical Measures	0.1938	0.0361	5.3629	8.1887e-08
Volume	ASAT	30750	Glycated haemoglobin (mmol/mol)	Biological samples	0.2152	0.0406	5.3067	1.1162e-07
Volume	ASAT	20441	Ever had prolonged loss of interest in normal activities	Online follow-up	0.3339	0.0632	5.2806	1.2877e-07
Volume	ASAT	2090	Seen doctor (GP) for nerves, anxiety, tension or depression	Medical history	0.2215	0.0422	5.2528	1.4977e-07
Volume	ASAT	20116	Smoking status: Never	Lifestyle and History	-0.1969	0.0377	-5.2214	1.7757e-07
Volume	ASAT	30740	Glucose (mmol/L)	Biological samples	0.243	0.0468	5.1934	2.0648e-07
Volume	ASAT	1970	Nervous feelings	Medical history	-0.2215	0.0429	-5.1622	2.44e-07
Volume	ASAT	30000	White blood cell (leukocyte) count	Biological samples	0.1962	0.0383	5.1233	3.0029e-07
Volume	ASAT	102	Pulse rate, automated reading	Physical Measures	0.1862	0.0374	4.9838	6.234e-07
Volume	ASAT	806	Job involves mainly walking or standing	Lifestyle and History	0.2462	0.0502	4.9031	9.4334e-07
Volume	ASAT	20150	Forced expiratory volume in 1-second (FEV1), Best measure	Physical Measures	-0.1765	0.0372	-4.7501	2.0333e-06
Volume	ASAT	4990	FI6 : conditional arithmetic	Physical Measures	-0.2635	0.0559	-4.7145	2.4234e-06
Volume	ASAT	3536	Age started hormone-replacement therapy (HRT)	Lifestyle and History	-0.3579	0.076	-4.7081	2.5003e-06
Volume	ASAT	3063	Forced expiratory volume in 1-second (FEV1)	Physical Measures	-0.1719	0.0368	-4.6762	2.9231e-06
Volume	ASAT	30850	Testosterone (nmol/L)	Biological samples	-0.2123	0.0454	-4.6713	2.993e-06
Volume	ASAT	1448	Bread type: White	Lifestyle and History	0.2273	0.0491	4.6288	3.6776e-06
Volume	ASAT	1568	Average weekly red wine intake	Lifestyle and History	-0.2136	0.0464	-4.6062	4.1018e-06
Volume	ASAT	1757	Facial ageing	Lifestyle and History	0.1957	0.0427	4.5849	4.5427e-06
Volume	ASAT	2714	NA	Lifestyle and History	-0.1706	0.0375	-4.5479	5.4171e-06
Volume	ASAT	30140	Neutrophill count	Biological samples	0.1614	0.0358	4.5064	6.5939e-06
Volume	ASAT	1190	Nap during day	Medical history	0.1904	0.0425	4.4832	7.3532e-06
Volume	ASAT	1518	Hot drink temperature	Lifestyle and History	0.1815	0.0408	4.4506	8.5618e-06
Volume	ASAT	20154	Forced expiratory volume in 1-second (FEV1), predicted percentage	Physical Measures	-0.2156	0.0486	-4.4318	9.3447e-06
Volume	ASAT	4581	Financial situation satisfaction	Medical history	0.2538	0.0583	4.3512	1.3538e-05
Volume	ASAT	1697	Comparative height size at age 10	Lifestyle and History	0.1476	0.0342	4.3177	1.5767e-05
Volume	VAT	48	Waist circumference	Physical Measures	0.7473	0.0336	22.2357	1.5516e-109
Volume	VAT	23128	Trunk fat mass	Physical Measures	0.6917	0.0347	19.9491	1.525e-88
Volume	VAT	23100	Whole body fat mass	Physical Measures	0.7016	0.0353	19.9009	4.0004e-88
Volume	VAT	23112	Leg fat mass (right)	Physical Measures	0.7125	0.036	19.7931	3.4141e-87
Volume	VAT	23116	Leg fat mass (left)	Physical Measures	0.7111	0.0362	19.654	5.3391e-86
Volume	VAT	23099	Body fat percentage	Physical Measures	0.704	0.0365	19.2978	5.6083e-83
Volume	VAT	23124	Arm fat mass (left)	Physical Measures	0.6869	0.0357	19.2348	1.8941e-82
Volume	VAT	23127	Trunk fat percentage	Physical Measures	0.6901	0.0359	19.2044	3.4015e-82
Volume	VAT	23120	Arm fat mass (right)	Physical Measures	0.6876	0.0358	19.1856	4.886e-82
Volume	VAT	23111	Leg fat percentage (right)	Physical Measures	0.7116	0.0373	19.0956	2.7487e-81
Volume	VAT	23115	Leg fat percentage (left)	Physical Measures	0.7116	0.0377	18.889	1.4054e-79
Volume	VAT	23098	Weight	Physical Measures	0.6061	0.0339	17.8819	1.6313e-71
Volume	VAT	23119	Arm fat percentage (right)	Physical Measures	0.6672	0.0376	17.7675	1.2622e-70
Volume	VAT	21002	Weight	Physical Measures	0.6035	0.034	17.7479	1.7905e-70
Volume	VAT	23123	Arm fat percentage (left)	Physical Measures	0.6627	0.0377	17.5864	3.1295e-69
Volume	VAT	23104	Body mass index (BMI)	Physical Measures	0.6541	0.0378	17.2934	5.2789e-67
Volume	VAT	21001	Body mass index (BMI)	Physical Measures	0.6515	0.0377	17.2888	5.7089e-67
Volume	VAT	49	Hip circumference	Physical Measures	0.5567	0.0362	15.3617	2.9571e-53
Volume	VAT	23105	Basal metabolic rate	Physical Measures	0.4302	0.0331	12.9925	1.3497e-38
Volume	VAT	23126	Arm predicted mass (left)	Physical Measures	0.438	0.0338	12.9413	2.6302e-38
Volume	VAT	23125	Arm fat-free mass (left)	Physical Measures	0.4321	0.0335	12.8869	5.336e-38
Volume	VAT	2178	Overall health rating	Medical history	0.537	0.0422	12.738	3.637e-37
Volume	VAT	23118	Leg predicted mass (left)	Physical Measures	0.4202	0.0337	12.4769	9.9786e-36
Volume	VAT	23117	Leg fat-free mass (left)	Physical Measures	0.4201	0.0337	12.461	1.2184e-35
Volume	VAT	23122	Arm predicted mass (right)	Physical Measures	0.4084	0.0333	12.2676	1.3521e-34
Volume	VAT	23121	Arm fat-free mass (right)	Physical Measures	0.3985	0.033	12.0872	1.2342e-33
Volume	VAT	924	Usual walking pace	Lifestyle and History	-0.4966	0.0418	-11.8721	1.6526e-32
Volume	VAT	1070	Time spent watching television (TV)	Lifestyle and History	0.4706	0.0409	11.5135	1.1284e-30
Volume	VAT	23114	Leg predicted mass (right)	Physical Measures	0.3839	0.0339	11.3293	9.3953e-30
Volume	VAT	23113	Leg fat-free mass (right)	Physical Measures	0.3834	0.034	11.2901	1.4694e-29
Volume	VAT	30530	Sodium in urine	Biological samples	0.4584	0.0423	10.8356	2.3336e-27
Volume	VAT	23101	Whole body fat-free mass	Physical Measures	0.3562	0.033	10.7974	3.542e-27
Volume	VAT	23102	Whole body water mass	Physical Measures	0.3563	0.0332	10.7466	6.1503e-27
Volume	VAT	6138	Qualifications: College or University degree	Lifestyle and History	-0.3786	0.0359	-10.5439	5.4203e-26
Volume	VAT	30510	Creatinine (enzymatic) in urine	Biological samples	0.4422	0.0427	10.3474	4.2995e-25
Volume	VAT	6154	Medication for pain relief, constipation, heartburn: None of the above	Medical history	-0.4298	0.0445	-9.6622	4.3659e-22
Volume	VAT	6138	Qualifications: None of the above	Lifestyle and History	0.3598	0.0383	9.4052	5.1941e-21
Volume	VAT	6138	Qualifications: A levels/AS levels or equivalent	Lifestyle and History	-0.3883	0.0414	-9.3888	6.0663e-21
Volume	VAT	6150	Vascular/heart problems diagnosed by doctor: None of the above	Medical history	-0.369	0.0394	-9.3718	7.1276e-21
Volume	VAT	3143	Ankle spacing width	Physical Measures	0.3547	0.0383	9.2627	1.9931e-20
Volume	VAT	2316	Wheeze or whistling in the chest in last year	Medical history	0.4434	0.0482	9.1974	3.6677e-20
Volume	VAT	1210	Snoring	Medical history	-0.3687	0.0409	-9.0216	1.8541e-19
Volume	VAT	23129	Trunk fat-free mass	Physical Measures	0.2953	0.033	8.9388	3.9325e-19
Volume	VAT	23130	Trunk predicted mass	Physical Measures	0.2952	0.0331	8.929	4.2992e-19
Volume	VAT	2139	Age first had sexual intercourse	Lifestyle and History	-0.3543	0.0405	-8.7423	2.2849e-18
Volume	VAT	6150	Vascular/heart problems diagnosed by doctor: High blood pressure	Medical history	0.3384	0.0389	8.6941	3.4953e-18
Volume	VAT	845	Age completed full time education	Lifestyle and History	-0.3735	0.0431	-8.6646	4.5297e-18
Volume	VAT	30280	Immature reticulocyte fraction	Biological samples	0.3626	0.042	8.6347	5.889e-18
Volume	VAT	4100	Ankle spacing width (left)	Physical Measures	0.353	0.0412	8.5725	1.0122e-17
Volume	VAT	2080	Frequency of tiredness / lethargy in last 2 weeks	Medical history	0.3766	0.0447	8.4191	3.7927e-17
Volume	VAT	4119	Ankle spacing width (right)	Physical Measures	0.3299	0.0398	8.2807	1.2247e-16
Volume	VAT	2754	Age at first live birth	Lifestyle and History	-0.3812	0.0461	-8.2667	1.377e-16
Volume	VAT	135	Number of self-reported non-cancer illnesses	Medical history	0.4329	0.0542	7.99	1.3492e-15
Volume	VAT	137	Number of treatments/medications taken	Medical history	0.4308	0.0541	7.9589	1.7356e-15
Volume	VAT	6177	NA	Medical history	-0.3794	0.0481	-7.8876	3.0799e-15
Volume	VAT	1319	Dried fruit intake	Lifestyle and History	-0.3402	0.0446	-7.627	2.4034e-14
Volume	VAT	1618	Alcohol usually taken with meals	Lifestyle and History	-0.3327	0.0441	-7.5454	4.5092e-14
Volume	VAT	4548	Health satisfaction	Medical history	0.4646	0.0618	7.5201	5.4733e-14
Volume	VAT	23110	Impedance of arm (left)	Physical Measures	-0.2816	0.0377	-7.4638	8.4051e-14
Volume	VAT	816	Job involves heavy manual or physical work	Lifestyle and History	0.3533	0.0479	7.3779	1.6079e-13
Volume	VAT	30620	Alanine aminotransferase (U/L)	Biological samples	0.36	0.0489	7.3662	1.7551e-13
Volume	VAT	30000	White blood cell (leukocyte) count	Biological samples	0.2785	0.0383	7.2761	3.4367e-13
Volume	VAT	1458	Cereal intake	Lifestyle and History	-0.3538	0.0487	-7.2576	3.9407e-13
Volume	VAT	23109	Impedance of arm (right)	Physical Measures	-0.2669	0.0373	-7.1614	7.9848e-13
Volume	VAT	6153	NA	Medical history	-0.3823	0.0539	-7.0911	1.33e-12
Volume	VAT	2764	Age at last live birth	Lifestyle and History	-0.3755	0.0539	-6.9668	3.2422e-12
Volume	VAT	6177	NA	Medical history	0.3915	0.0567	6.9062	4.9797e-12
Volume	VAT	1960	Fed-up feelings	Medical history	0.3039	0.0441	6.884	5.8208e-12
Volume	VAT	23106	Impedance of whole body	Physical Measures	-0.2585	0.0379	-6.8193	9.1513e-12
Volume	VAT	2090	Seen doctor (GP) for nerves, anxiety, tension or depression	Medical history	0.2863	0.0421	6.795	1.0831e-11
Volume	VAT	1448	Bread type: White	Lifestyle and History	0.3519	0.0518	6.793	1.0979e-11
Volume	VAT	806	Job involves mainly walking or standing	Lifestyle and History	0.3524	0.0527	6.6806	2.379e-11
Volume	VAT	1050	Time spend outdoors in summer	Lifestyle and History	0.3018	0.0454	6.6464	3.0044e-11
Volume	VAT	6153	NA	Medical history	0.3258	0.0496	6.5753	4.8555e-11
Volume	VAT	1239	Current tobacco smoking	Lifestyle and History	0.3156	0.048	6.57	5.0312e-11
Volume	VAT	6177	NA	Medical history	0.3031	0.0467	6.4871	8.7496e-11
Volume	VAT	4079	Diastolic blood pressure, automated reading	Physical Measures	0.2652	0.0409	6.4834	8.9664e-11
Volume	VAT	22501	Year ended full time education	Online follow-up	-0.3314	0.0512	-6.4772	9.3425e-11
Volume	VAT	20459	General happiness with own health	Online follow-up	0.3958	0.0616	6.4239	1.3286e-10
Volume	VAT	1920	Mood swings	Medical history	0.2702	0.0425	6.3543	2.0931e-10
Volume	VAT	30140	Neutrophill count	Biological samples	0.2462	0.0391	6.3001	2.9737e-10
Volume	VAT	20536	Weight change during worst episode of depression: Stayed about the same or was on a diet	Online follow-up	-0.5071	0.0812	-6.2412	4.3414e-10
Volume	VAT	30120	Lymphocyte count	Biological samples	0.2264	0.0363	6.2337	4.5544e-10
Volume	VAT	20441	Ever had prolonged loss of interest in normal activities	Online follow-up	0.3355	0.0573	5.8497	4.9249e-09
Volume	VAT	20151	Forced vital capacity (FVC), Best measure	Physical Measures	-0.218	0.0373	-5.8491	4.9411e-09
Volume	VAT	20519	Recent feelings of tiredness or low energy	Online follow-up	0.3712	0.0636	5.8325	5.4606e-09
Volume	VAT	1190	Nap during day	Medical history	0.2305	0.0399	5.7749	7.6977e-09
Volume	VAT	1568	Average weekly red wine intake	Lifestyle and History	-0.289	0.0501	-5.7725	7.8124e-09
Volume	VAT	102	Pulse rate, automated reading	Physical Measures	0.2198	0.0382	5.7533	8.7518e-09
Volume	VAT	6149	Mouth/teeth dental problems: Dentures	Medical history	0.2815	0.0501	5.6202	1.9072e-08
Volume	VAT	4990	FI6 : conditional arithmetic	Physical Measures	-0.3686	0.066	-5.5882	2.2941e-08
Volume	VAT	1508	Coffee type: Ground coffee (include espresso, filter etc)	Lifestyle and History	-0.2599	0.0476	-5.4632	4.6775e-08
Volume	VAT	23108	Impedance of leg (left)	Physical Measures	-0.2089	0.0387	-5.401	6.626e-08
Volume	VAT	2237	Plays computer games	Lifestyle and History	0.2506	0.0469	5.3395	9.3183e-08
Volume	VAT	23107	Impedance of leg (right)	Physical Measures	-0.203	0.0382	-5.3205	1.0346e-07
Volume	VAT	20116	Smoking status: Never	Lifestyle and History	-0.2234	0.042	-5.3181	1.0487e-07
Volume	VAT	30750	Glycated haemoglobin (mmol/mol)	Biological samples	0.2083	0.0395	5.2675	1.3832e-07
Volume	VAT	3062	Forced vital capacity (FVC)	Physical Measures	-0.1988	0.0378	-5.266	1.3941e-07
Volume	VAT	30740	Glucose (mmol/L)	Biological samples	0.2512	0.0491	5.1143	3.1491e-07
Volume	VAT	20016	Fluid intelligence score	Physical Measures	-0.2348	0.0466	-5.0433	4.5763e-07
Volume	VAT	22506	Tobacco smoking: Never smoked	Online follow-up	-0.3154	0.0643	-4.9024	9.4679e-07
Volume	VAT	30850	Testosterone (nmol/L)	Biological samples	-0.1995	0.0437	-4.5689	4.904e-06
Volume	VAT	1200	Sleeplessness / insomnia	Medical history	0.2193	0.0482	4.5478	5.4206e-06
Volume	VAT	4080	Systolic blood pressure, automated reading	Physical Measures	0.1617	0.0356	4.5385	5.6647e-06
Volume	VAT	22506	Tobacco smoking: Ex-smoker	Online follow-up	0.3079	0.0684	4.5051	6.6356e-06
Volume	VAT	2867	Age started smoking in former smokers	Lifestyle and History	-0.3268	0.0728	-4.4895	7.1388e-06
Volume	VAT	1518	Hot drink temperature	Lifestyle and History	0.1967	0.0439	4.485	7.2925e-06
Volume	VAT	30890	Vitamin D (nmol/L)	Biological samples	-0.2042	0.0457	-4.4673	7.9231e-06
Volume	VAT	5012	FI8 : chained arithmetic	Physical Measures	-0.2575	0.058	-4.4428	8.8803e-06
Volume	VAT	400	Time to complete round	Physical Measures	-0.1622	0.0369	-4.3919	1.1238e-05
Volume	VAT	1930	Miserableness	Medical history	0.2033	0.0464	4.384	1.1649e-05
Volume	VAT	4968	FI4 : positional arithmetic	Physical Measures	-0.2753	0.0629	-4.3785	1.1952e-05
Volume	VAT	2887	Number of cigarettes previously smoked daily	Lifestyle and History	0.304	0.0701	4.3349	1.4581e-05
Fat	Liver	23115	Leg fat percentage (left)	Physical Measures	0.5252	0.0502	10.4571	1.3601e-25
Fat	Liver	23111	Leg fat percentage (right)	Physical Measures	0.5182	0.0497	10.416	2.096e-25
Fat	Liver	30620	Alanine aminotransferase (U/L)	Biological samples	0.5003	0.0506	9.8932	4.454e-23
Fat	Liver	48	Waist circumference	Physical Measures	0.5103	0.0543	9.3908	5.9536e-21
Fat	Liver	23116	Leg fat mass (left)	Physical Measures	0.469	0.0504	9.3091	1.2895e-20
Fat	Liver	23112	Leg fat mass (right)	Physical Measures	0.4667	0.0503	9.2808	1.6824e-20
Fat	Liver	23099	Body fat percentage	Physical Measures	0.4767	0.0515	9.2573	2.0958e-20
Fat	Liver	21001	Body mass index (BMI)	Physical Measures	0.4506	0.0513	8.7757	1.6978e-18
Fat	Liver	23104	Body mass index (BMI)	Physical Measures	0.4556	0.0521	8.747	2.1907e-18
Fat	Liver	23100	Whole body fat mass	Physical Measures	0.4361	0.0504	8.6597	4.7304e-18
Fat	Liver	2178	Overall health rating	Medical history	0.3809	0.0442	8.6262	6.3422e-18
Fat	Liver	23127	Trunk fat percentage	Physical Measures	0.4495	0.0524	8.5724	1.0136e-17
Fat	Liver	1070	Time spent watching television (TV)	Lifestyle and History	0.3914	0.0457	8.5621	1.1088e-17
Fat	Liver	23119	Arm fat percentage (right)	Physical Measures	0.4412	0.0519	8.4966	1.952e-17
Fat	Liver	23123	Arm fat percentage (left)	Physical Measures	0.4434	0.0522	8.49	2.0668e-17
Fat	Liver	23124	Arm fat mass (left)	Physical Measures	0.4298	0.051	8.4238	3.6444e-17
Fat	Liver	23120	Arm fat mass (right)	Physical Measures	0.4305	0.0515	8.3547	6.5574e-17
Fat	Liver	23128	Trunk fat mass	Physical Measures	0.418	0.0504	8.2933	1.1013e-16
Fat	Liver	924	Usual walking pace	Lifestyle and History	-0.3786	0.0458	-8.2648	1.3993e-16
Fat	Liver	20151	Forced vital capacity (FVC), Best measure	Physical Measures	-0.2974	0.0389	-7.6357	2.2461e-14
Fat	Liver	1448	Bread type: White	Lifestyle and History	0.3915	0.0526	7.445	9.6971e-14
Fat	Liver	23098	Weight	Physical Measures	0.3322	0.0459	7.2354	4.6419e-13
Fat	Liver	21002	Weight	Physical Measures	0.3282	0.0454	7.2229	5.0874e-13
Fat	Liver	3062	Forced vital capacity (FVC)	Physical Measures	-0.2815	0.0391	-7.2059	5.7658e-13
Fat	Liver	6138	Qualifications: A levels/AS levels or equivalent	Lifestyle and History	-0.316	0.0441	-7.1585	8.1546e-13
Fat	Liver	6138	Qualifications: College or University degree	Lifestyle and History	-0.3072	0.0432	-7.1138	1.1291e-12
Fat	Liver	845	Age completed full time education	Lifestyle and History	-0.3056	0.0439	-6.9674	3.2293e-12
Fat	Liver	6138	Qualifications: None of the above	Lifestyle and History	0.2861	0.0412	6.9404	3.9096e-12
Fat	Liver	30530	Sodium in urine	Biological samples	0.4053	0.059	6.8642	6.6863e-12
Fat	Liver	30000	White blood cell (leukocyte) count	Biological samples	0.2862	0.042	6.8139	9.4968e-12
Fat	Liver	49	Hip circumference	Physical Measures	0.2898	0.0432	6.7143	1.8893e-11
Fat	Liver	2139	Age first had sexual intercourse	Lifestyle and History	-0.2757	0.0428	-6.4487	1.1282e-10
Fat	Liver	6154	Medication for pain relief, constipation, heartburn: None of the above	Medical history	-0.3526	0.055	-6.4142	1.4159e-10
Fat	Liver	20150	Forced expiratory volume in 1-second (FEV1), Best measure	Physical Measures	-0.2477	0.0394	-6.2892	3.1915e-10
Fat	Liver	2754	Age at first live birth	Lifestyle and History	-0.3041	0.0485	-6.2752	3.4909e-10
Fat	Liver	30750	Glycated haemoglobin (mmol/mol)	Biological samples	0.2344	0.0376	6.2406	4.3589e-10
Fat	Liver	1050	Time spend outdoors in summer	Lifestyle and History	0.2952	0.0485	6.0826	1.1828e-09
Fat	Liver	6150	Vascular/heart problems diagnosed by doctor: None of the above	Medical history	-0.2774	0.0464	-5.973	2.3298e-09
Fat	Liver	2080	Frequency of tiredness / lethargy in last 2 weeks	Medical history	0.3018	0.0506	5.9666	2.4232e-09
Fat	Liver	2316	Wheeze or whistling in the chest in last year	Medical history	0.3327	0.0565	5.8879	3.9124e-09
Fat	Liver	1319	Dried fruit intake	Lifestyle and History	-0.2962	0.0503	-5.8877	3.917e-09
Fat	Liver	1458	Cereal intake	Lifestyle and History	-0.328	0.0557	-5.8852	3.9751e-09
Fat	Liver	806	Job involves mainly walking or standing	Lifestyle and History	0.331	0.0568	5.8304	5.5286e-09
Fat	Liver	30510	Creatinine (enzymatic) in urine	Biological samples	0.3021	0.0521	5.7982	6.7016e-09
Fat	Liver	3063	Forced expiratory volume in 1-second (FEV1)	Physical Measures	-0.2234	0.0387	-5.7655	8.1394e-09
Fat	Liver	135	Number of self-reported non-cancer illnesses	Medical history	0.4204	0.073	5.7555	8.6363e-09
Fat	Liver	137	Number of treatments/medications taken	Medical history	0.3699	0.0654	5.655	1.5585e-08
Fat	Liver	30120	Lymphocyte count	Biological samples	0.312	0.0556	5.6149	1.9664e-08
Fat	Liver	816	Job involves heavy manual or physical work	Lifestyle and History	0.3221	0.0574	5.613	1.9884e-08
Fat	Liver	6150	Vascular/heart problems diagnosed by doctor: High blood pressure	Medical history	0.2538	0.0454	5.5928	2.235e-08
Fat	Liver	22501	Year ended full time education	Online follow-up	-0.3495	0.0634	-5.5126	3.536e-08
Fat	Liver	30280	Immature reticulocyte fraction	Biological samples	0.3198	0.0583	5.4821	4.2031e-08
Fat	Liver	30140	Neutrophill count	Biological samples	0.2042	0.038	5.3739	7.7058e-08
Fat	Liver	23126	Arm predicted mass (left)	Physical Measures	0.2071	0.0392	5.2846	1.2596e-07
Fat	Liver	23110	Impedance of arm (left)	Physical Measures	-0.2285	0.0438	-5.2152	1.8361e-07
Fat	Liver	23109	Impedance of arm (right)	Physical Measures	-0.2247	0.0431	-5.2082	1.9071e-07
Fat	Liver	23125	Arm fat-free mass (left)	Physical Measures	0.2033	0.0393	5.1742	2.2891e-07
Fat	Liver	4548	Health satisfaction	Medical history	0.3383	0.0657	5.1475	2.64e-07
Fat	Liver	1239	Current tobacco smoking	Lifestyle and History	0.309	0.0601	5.1412	2.7293e-07
Fat	Liver	1210	Snoring	Medical history	-0.264	0.0514	-5.1346	2.8282e-07
Fat	Liver	6177	NA	Medical history	-0.3485	0.0692	-5.0385	4.6915e-07
Fat	Liver	30680	Calcium (mmol/L)	Biological samples	0.2325	0.0469	4.9604	7.0339e-07
Fat	Liver	23122	Arm predicted mass (right)	Physical Measures	0.1912	0.0389	4.9159	8.8388e-07
Fat	Liver	6149	Mouth/teeth dental problems: Dentures	Medical history	0.2821	0.0576	4.897	9.7329e-07
Fat	Liver	102	Pulse rate, automated reading	Physical Measures	0.2132	0.0441	4.8398	1.3e-06
Fat	Liver	23121	Arm fat-free mass (right)	Physical Measures	0.1872	0.0387	4.8314	1.3555e-06
Fat	Liver	2764	Age at last live birth	Lifestyle and History	-0.2683	0.0561	-4.7802	1.7516e-06
Fat	Liver	1960	Fed-up feelings	Medical history	0.2182	0.0462	4.7225	2.3295e-06
Fat	Liver	1190	Nap during day	Medical history	0.2274	0.0484	4.696	2.6531e-06
Fat	Liver	6153	NA	Medical history	-0.2995	0.0641	-4.6739	2.9557e-06
Fat	Liver	20519	Recent feelings of tiredness or low energy	Online follow-up	0.3328	0.0716	4.6483	3.3474e-06
Fat	Liver	4990	FI6 : conditional arithmetic	Physical Measures	-0.3057	0.066	-4.6336	3.5933e-06
Fat	Liver	1920	Mood swings	Medical history	0.2241	0.0486	4.6081	4.0641e-06
Fat	Liver	23105	Basal metabolic rate	Physical Measures	0.1835	0.0398	4.6065	4.0954e-06
Fat	Liver	1508	Coffee type: Ground coffee (include espresso, filter etc)	Lifestyle and History	-0.2482	0.0542	-4.5775	4.7051e-06
Fat	Liver	20016	Fluid intelligence score	Physical Measures	-0.2158	0.0477	-4.5231	6.0931e-06
Fat	Liver	6177	NA	Medical history	0.2339	0.052	4.4968	6.8987e-06
Fat	Liver	20459	General happiness with own health	Online follow-up	0.3566	0.0797	4.4749	7.6464e-06
Fat	Liver	30850	Testosterone (nmol/L)	Biological samples	-0.2755	0.0627	-4.3904	1.1316e-05
Fat	Liver	6153	NA	Medical history	0.2284	0.0526	4.3426	1.408e-05
Fat	Liver	4080	Systolic blood pressure, automated reading	Physical Measures	0.1843	0.0426	4.323	1.5394e-05
Fat	Pancreas	23099	Body fat percentage	Physical Measures	0.5293	0.0507	10.4335	1.7435e-25
Fat	Pancreas	23127	Trunk fat percentage	Physical Measures	0.5214	0.0507	10.2739	9.2388e-25
Fat	Pancreas	23119	Arm fat percentage (right)	Physical Measures	0.5109	0.0499	10.2417	1.2891e-24
Fat	Pancreas	23115	Leg fat percentage (left)	Physical Measures	0.5258	0.0517	10.1648	2.8463e-24
Fat	Pancreas	23123	Arm fat percentage (left)	Physical Measures	0.5082	0.05	10.1603	2.983e-24
Fat	Pancreas	23111	Leg fat percentage (right)	Physical Measures	0.5342	0.0527	10.1344	3.8888e-24
Fat	Pancreas	48	Waist circumference	Physical Measures	0.5337	0.0536	9.9651	2.1656e-23
Fat	Pancreas	23100	Whole body fat mass	Physical Measures	0.5023	0.0505	9.9527	2.4537e-23
Fat	Pancreas	23116	Leg fat mass (left)	Physical Measures	0.5086	0.0513	9.917	3.513e-23
Fat	Pancreas	23112	Leg fat mass (right)	Physical Measures	0.5142	0.052	9.891	4.5557e-23
Fat	Pancreas	23120	Arm fat mass (right)	Physical Measures	0.4948	0.0502	9.8645	5.9357e-23
Fat	Pancreas	23128	Trunk fat mass	Physical Measures	0.5004	0.0508	9.844	7.2795e-23
Fat	Pancreas	23124	Arm fat mass (left)	Physical Measures	0.4966	0.0505	9.8265	8.6601e-23
Fat	Pancreas	23104	Body mass index (BMI)	Physical Measures	0.4847	0.0523	9.2737	1.7975e-20
Fat	Pancreas	21001	Body mass index (BMI)	Physical Measures	0.486	0.0526	9.2483	2.2799e-20
Fat	Pancreas	23098	Weight	Physical Measures	0.4126	0.0499	8.2729	1.3073e-16
Fat	Pancreas	21002	Weight	Physical Measures	0.4127	0.0499	8.2716	1.3219e-16
Fat	Pancreas	49	Hip circumference	Physical Measures	0.3841	0.048	8.0051	1.1935e-15
Fat	Pancreas	1070	Time spent watching television (TV)	Lifestyle and History	0.376	0.0557	6.7462	1.518e-11
Fat	Pancreas	924	Usual walking pace	Lifestyle and History	-0.3977	0.0599	-6.6357	3.2306e-11
Fat	Pancreas	3143	Ankle spacing width	Physical Measures	0.3254	0.0514	6.3297	2.4569e-10
Fat	Pancreas	2178	Overall health rating	Medical history	0.3751	0.0598	6.2743	3.5115e-10
Fat	Pancreas	6138	Qualifications: College or University degree	Lifestyle and History	-0.2886	0.0462	-6.2432	4.2879e-10
Fat	Pancreas	23117	Leg fat-free mass (left)	Physical Measures	0.2762	0.0483	5.7219	1.0533e-08
Fat	Pancreas	23118	Leg predicted mass (left)	Physical Measures	0.2774	0.0485	5.7178	1.0792e-08
Fat	Pancreas	23105	Basal metabolic rate	Physical Measures	0.2662	0.0484	5.4992	3.8157e-08
Fat	Pancreas	30530	Sodium in urine	Biological samples	0.2938	0.0536	5.4849	4.1371e-08
Fat	Pancreas	137	Number of treatments/medications taken	Medical history	0.4179	0.0776	5.3827	7.3373e-08
Fat	Pancreas	4100	Ankle spacing width (left)	Physical Measures	0.3024	0.0568	5.3208	1.0332e-07
Fat	Pancreas	1618	Alcohol usually taken with meals	Lifestyle and History	-0.3026	0.0571	-5.3036	1.1353e-07
Fat	Pancreas	23125	Arm fat-free mass (left)	Physical Measures	0.2615	0.0497	5.2589	1.4493e-07
Fat	Pancreas	6138	Qualifications: A levels/AS levels or equivalent	Lifestyle and History	-0.2877	0.0549	-5.2396	1.609e-07
Fat	Pancreas	6150	Vascular/heart problems diagnosed by doctor: None of the above	Medical history	-0.3059	0.0585	-5.229	1.7043e-07
Fat	Pancreas	6154	Medication for pain relief, constipation, heartburn: None of the above	Medical history	-0.3337	0.0642	-5.1993	2.0005e-07
Fat	Pancreas	23126	Arm predicted mass (left)	Physical Measures	0.2593	0.0501	5.1773	2.2512e-07
Fat	Pancreas	23114	Leg predicted mass (right)	Physical Measures	0.2434	0.048	5.0724	3.9279e-07
Fat	Pancreas	23113	Leg fat-free mass (right)	Physical Measures	0.2434	0.0481	5.0622	4.1452e-07
Fat	Pancreas	1210	Snoring	Medical history	-0.3157	0.0625	-5.0527	4.3568e-07
Fat	Pancreas	4119	Ankle spacing width (right)	Physical Measures	0.2893	0.0576	5.0219	5.1175e-07
Fat	Pancreas	30280	Immature reticulocyte fraction	Biological samples	0.2863	0.0573	4.9983	5.7833e-07
Fat	Pancreas	6138	Qualifications: None of the above	Lifestyle and History	0.245	0.0494	4.9581	7.1188e-07
Fat	Pancreas	23121	Arm fat-free mass (right)	Physical Measures	0.2436	0.0501	4.8596	1.176e-06
Fat	Pancreas	6150	Vascular/heart problems diagnosed by doctor: High blood pressure	Medical history	0.2747	0.0566	4.8527	1.2178e-06
Fat	Pancreas	23122	Arm predicted mass (right)	Physical Measures	0.2398	0.0496	4.8341	1.3375e-06
Fat	Pancreas	1458	Cereal intake	Lifestyle and History	-0.2969	0.0619	-4.7975	1.6068e-06
Fat	Pancreas	20151	Forced vital capacity (FVC), Best measure	Physical Measures	-0.2175	0.0457	-4.763	1.9073e-06
Fat	Pancreas	1319	Dried fruit intake	Lifestyle and History	-0.3191	0.0672	-4.7485	2.0496e-06
Fat	Pancreas	22501	Year ended full time education	Online follow-up	-0.302	0.0646	-4.6727	2.9721e-06
Fat	Pancreas	3062	Forced vital capacity (FVC)	Physical Measures	-0.2141	0.046	-4.6542	3.253e-06
Fat	Pancreas	6177	NA	Medical history	-0.3295	0.073	-4.5144	6.3484e-06
Fat	Pancreas	6153	NA	Medical history	0.3222	0.0722	4.4631	8.0801e-06
Fat	Pancreas	23101	Whole body fat-free mass	Physical Measures	0.2101	0.0477	4.4013	1.0759e-05
Fat	Pancreas	23102	Whole body water mass	Physical Measures	0.2095	0.0478	4.3813	1.18e-05
Fat	Pancreas	2754	Age at first live birth	Lifestyle and History	-0.2569	0.0595	-4.3161	1.5883e-05
Iron	Liver	30070	Red blood cell (erythrocyte) distribution width	Biological samples	-0.33464	0.0438	-7.6428	2.1251e-14

## Sheet: File 1h Lead SNPs
trait	organ	var_id	var_index	rs_id	var_conditional	pv	pp	beta	closest_gene	distance
Volume	Liver	1:26987646:A:G:b37	1:26987646:A:G:b37	rs193084249	NA	6.5E-10	0.608	0.143	ARID1A	32081
Volume	Liver	2:27730940:T:C:b37	2:27730940:T:C:b37	rs1260326	NA	5.4E-19	0.965	-0.0636	GCKR	11234
Volume	Liver	3:172294500:G:A:b37	3:172294500:G:A:b37	rs79287178	NA	8.0E-13	0.986	0.151	TNFSF10	53235
Volume	Liver	6:52623490:G:C:b37	6:52623490:G:C:b37	rs1009064	NA	1.3E-8	0.0381	-0.0414	GSTA2	4783
Volume	Liver	6:127066487:G:GA:b37	6:127066487:G:GA:b37	rs753444559	NA	9.5E-13	0.0214	-0.0501	RSPO3	373329
Volume	Liver	8:9184231:G:A:b37	8:9184231:G:A:b37	rs4240624	NA	1.3E-31	0.278	-0.143	PPP1R3B	175147
Volume	Liver	10:65104500:A:G:b37	10:65104500:A:G:b37	rs7896518	NA	4.1E-13	0.0303	-0.0517	REEP3	176661
Volume	Liver	10:93507964:G:T:b37	10:93507964:G:T:b37	rs10881959	NA	6.8E-11	0.053	0.046	TNKS2	50219
Volume	Liver	15:43735763:C:T:b37	15:43637567:A:AAAG:b37	rs2256764	15:43278726:G:A:b37,15:43580645:C:T:b37,15:44027885:T:C:b37	8.329999999999999E-34	0.321	-0.144	TP53BP1	67163
Volume	Liver	15:44027885:T:C:b37	15:44027885:T:C:b37	rs139974673	NA	4.9E-21	0.848	0.214	PDIA3	10723
Volume	Liver	16:53812783:TTTTG:T:b37	16:53812783:TTTTG:T:b37	NA	NA	2.7E-9	0.0272	0.0432
Volume	Liver	19:19456917:C:T:b37	19:19456917:C:T:b37	rs58489806	NA	3.0E-11	0.178	0.0827	MAU2	25279
Volume	Pancreas	1:33915751:T:C:b37	1:33915751:T:C:b37	rs2336240	NA	2.5E-8	0.106	0.044	PHC2	19098
Volume	Pancreas	1:213825272:G:C:b37	1:213825272:G:C:b37	rs11120180	NA	1.3E-8	0.375	0.0541	PROX1	331252
Volume	Pancreas	2:239798829:AG:A:b37	2:239798829:AG:A:b37	NA	NA	1.6E-8	0.178	0.0596	TWIST2	42156
Volume	Pancreas	6:109133485:C:G:b37	6:109133485:C:G:b37	rs36153289	NA	2.2E-8	0.0612	-0.0422	ARMC2	36134
Volume	Pancreas	6:127443092:T:C:b37	6:127443092:T:C:b37	rs9482770	NA	3.3E-14	0.215	0.0571	RSPO3	3276
Volume	Pancreas	8:129558351:C:A:b37	8:129558351:C:A:b37	rs7819154	NA	6.0E-15	0.324	-0.0654
Volume	Pancreas	9:136138765:GCGCCCACCACTA:G:b37	9:136138765:GCGCCCACCACTA:G:b37	NA	NA	7.5E-12	0.268	-0.0664	ABO	12662
Volume	Pancreas	10:49335932:T:C:b37	10:49335932:T:C:b37	rs2163150	NA	1.7E-16	0.62	-0.0732
Volume	Pancreas	10:90023033:T:C:b37	10:90023033:T:C:b37	rs10509540	NA	2.2E-9	0.577	-0.05	RNLS	321254
Volume	Pancreas	14:101306841:TC:T:b37	14:101306841:TC:T:b37	NA	NA	1.2E-12	0.283	-0.0537	RTL1	63218
Volume	Pancreas	16:75234872:C:A:b37	16:75234872:C:A:b37	rs72802342	NA	7.8E-15	0.458	0.111	CTRB2	6187
Volume	Pancreas	16:88975910:G:C:b37	16:88975910:G:C:b37	rs7405380	NA	2.1E-9	0.127	-0.0464	PABPN1L	42842
Volume	Pancreas	18:864347:G:GA:b37	18:864347:G:GA:b37	rs150747780	NA	3.8E-9	0.0822	0.0699	ADCYAP1	40525
Volume	Pancreas	18:1421021:G:C:b37	18:1421021:G:C:b37	rs1226053	NA	1.4E-8	0.716	0.043
Volume	Pancreas	18:56876386:A:T:b37	18:56876386:A:T:b37	rs922048	NA	2.6E-9	0.64	0.0453	GRP	11004
Volume	Pancreas	19:49268194:G:A:b37	19:49268194:G:A:b37	rs653395	NA	1.1E-8	0.188	0.0453	FGF21	9378
Volume	Pancreas	22:46364161:G:A:b37	22:46364161:G:A:b37	rs9330813	NA	9.7E-10	0.201	-0.0491	WNT7B	8881
Volume	Kidney	2:15733023:TA:T:b37	2:15733023:TA:T:b37	NA	NA	1.2E-15	0.42	0.0527	DDX1	1721
Volume	Kidney	2:176974104:G:T:b37	2:176974104:G:T:b37	rs863678	NA	4.2E-8	0.979	-0.0368	HOXD10	586
Volume	Kidney	4:145434688:T:C:b37	4:145434688:T:C:b37	rs1032296	NA	1.4E-9	0.203	0.0388	HHIP	132620
Volume	Kidney	6:43805362:T:A:b37	6:43805362:T:A:b37	rs744103	NA	2.2E-11	0.247	-0.0455	VEGFA	67441
Volume	Kidney	6:126873423:G:T:b37	6:126873423:G:T:b37	rs9388498	NA	1.2E-14	0.385	0.0639	CENPW	212103
Volume	Kidney	8:23784587:C:T:b37	8:23784587:C:T:b37	rs13267474	NA	1.4E-12	0.254	-0.0462	STC1	72268
Volume	Kidney	9:16044530:AT:A:b37	9:16044530:AT:A:b37	rs201684319	NA	7.6E-11	0.948	-0.0422	C9orf92	366458
Volume	Kidney	9:98256083:C:CAA:b37	9:98256083:C:CAA:b37	rs539286190	NA	5.3E-9	0.0587	0.0635	PTCH1	23256
Volume	Kidney	9:134601458:T:C:b37	9:134601458:T:C:b37	rs56005989	NA	1.5E-8	0.234	0.0403	RAPGEF1	14003
Volume	Kidney	16:20392332:G:A:b37	16:20392332:G:A:b37	rs77924615	NA	3.1E-11	0.889	0.0534	PDILT	23727
Volume	Kidney	16:53810686:T:C:b37	16:53810686:T:C:b37	rs7193144	NA	1.6E-9	0.0281	0.0392	RPGRIP1L	72836
Volume	Kidney	17:59456589:C:T:b37	17:59456589:C:T:b37	rs9895661	NA	3.1E-11	0.823	0.0561	TBX2	20615
Volume	Spleen	1:158612548:T:A:b37	1:158612548:T:A:b37	rs857721	NA	6.1E-12	0.141	-0.0536	OR10Z1	37490
Volume	Spleen	1:204283359:A:G:b37	1:204283359:A:G:b37	rs12034941	NA	2.6E-9	0.0457	0.0472	PLEKHA6	63434
Volume	Spleen	1:234864214:C:T:b37	1:234864214:C:T:b37	rs641154	NA	4.2E-8	0.218	0.0379	IRF2BP2	118942
Volume	Spleen	1:247719769:G:A:b37	1:247719769:G:A:b37	rs56043070	NA	3.1E-9	0.683	0.0791	OR2C3	20027
Volume	Spleen	2:202126615:A:G:b37	2:202126615:A:G:b37	rs1861270	NA	2.5E-9	0.0949	-0.0475	CASP8	28449
Volume	Spleen	2:227291731:C:G:b37	2:227291731:C:G:b37	rs11676298	NA	6.2E-13	0.239	-0.0631	IRS1	372744
Volume	Spleen	3:12268244:A:G:b37	3:12268244:A:G:b37	rs12491937	NA	2.5E-20	0.158	0.0648	PPARG	60624
Volume	Spleen	3:47087269:AT:A:b37	3:47087269:AT:A:b37	NA	NA	1.7E-8	0.294	0.0499	CCDC12	63769
Volume	Spleen	3:123110581:C:G:b37	3:123110581:C:G:b37	rs55968914	NA	5.2E-9	0.169	0.0487	ADCY5	58024
Volume	Spleen	3:159838910:GA:G:b37	3:159838910:GA:G:b37	NA	NA	3.0E-8	0.0558	0.0523	C3orf80	104373
Volume	Spleen	4:110834110:A:G:b37	4:110834110:A:G:b37	rs4444903	NA	4.3E-14	0.081	0.0533	EGF	70
Volume	Spleen	5:1280128:T:C:b37	5:1280128:T:C:b37	rs7734992	NA	4.9E-8	0.838	0.0389	TERT	15056
Volume	Spleen	6:33537546:A:G:b37	6:33537546:A:G:b37	rs169738	NA	3.8E-8	0.112	0.0387	BAK1	10524
Volume	Spleen	6:34215919:C:T:b37	6:34215919:C:T:b37	rs1150779	NA	5.7E-12	0.117	-0.0891	SMIM29	966
Volume	Spleen	6:130422142:A:G:b37	6:130422142:A:G:b37	rs12206651	NA	1.6E-9	0.202	0.0494	L3MBTL3	87298
Volume	Spleen	6:135022910:GC:G:b37	6:135022910:GC:G:b37	NA	6:135418632:TTAC:T:b37	9.93E-11	0.163	-0.056	ALDH8A1	248343
Volume	Spleen	6:135418632:TTAC:T:b37	6:135418632:TTAC:T:b37	rs778641135	NA	1.5E-11	0.413	0.0534	HBS1L	5562
Volume	Spleen	9:21986847:T:A:b37	9:21986847:T:A:b37	rs3731211	9:22142756:T:C:b37	2.02E-15	0.362	-0.0616	CDKN2A	8453
Volume	Spleen	9:22142756:T:C:b37	9:22142756:T:C:b37	rs12376511	NA	9.199999999999999E-23	0.284	0.0922	CDKN2B	133452
Volume	Spleen	9:91392686:TTC:T:b37	9:91392686:TTC:T:b37	NA	NA	3.2E-23	0.431	0.155	S1PR3	213092
Volume	Spleen	10:50313886:G:GTA:b37	10:50313886:G:GTA:b37	rs34327380	NA	7.2E-10	0.246	0.0582	VSTM4	9681
Volume	Spleen	11:100463238:C:G:b37	11:100463238:C:G:b37	rs11224309	NA	1.9E-15	0.0838	0.0927	ARHGAP42	94781
Volume	Spleen	12:6509886:A:G:b37	12:6509886:A:G:b37	rs111893804	NA	1.1E-12	0.415	0.0521	SCNN1A	22990
Volume	Spleen	12:51194827:G:A:b37	12:51194827:G:A:b37	rs4768862	NA	9.4E-10	0.0482	-0.045	ATF1	37334
Volume	Spleen	12:111932800:C:T:b37	12:111932800:C:T:b37	rs7137828	NA	3.4999999999999996E-83	0.433	-0.133	SH2B3	89048
Volume	Spleen	12:112105502:C:CAAAA:b37	12:112105502:C:CAAAA:b37	rs565349424	12:111932800:C:T:b37,12:112108905:C:CA:b37,12:112591686:G:A:b37	9.7E-28	0.999	0.0775
Volume	Spleen	12:112301729:C:T:b37	12:112108905:C:CA:b37	rs142324638	12:111932800:C:T:b37,12:112105502:C:CAAAA:b37,12:112591686:G:A:b37	1.4999999999999996E-140	0.999	0.608	MAPKAPK5	21697
Volume	Spleen	12:112610714:G:A:b37	12:112591686:G:A:b37	rs11066188	12:112105502:C:CAAAA:b37,12:112108905:C:CA:b37,12:113027639:C:T:b37	1.23E-59	0.925	0.115	TRAFD1	47372
Volume	Spleen	12:112684221:A:T:b37	12:113135531:A:G:b37	rs7953257	12:113027639:C:T:b37	1.72E-58	0.907	-0.116	TRAFD1	120879
Volume	Spleen	12:113039943:C:T:b37	12:113027639:C:T:b37	rs233716	12:112591686:G:A:b37,12:113135531:A:G:b37	7.75E-15	0.354	0.0555	RPH3A	31759
Volume	Spleen	13:41535409:T:A:b37	13:41535409:T:A:b37	rs61963226	NA	8.6E-9	0.751	0.0503	ELF1	100167
Volume	Spleen	13:108960380:TGCTG:T:b37	13:108960380:TGCTG:T:b37	NA	NA	6.9E-14	0.85	0.203	TNFSF13B	56792
Volume	Spleen	14:93511785:A:T:b37	14:93511785:A:T:b37	rs28688110	NA	9.2E-11	0.124	-0.0719	ITPK1	70880
Volume	Spleen	15:30134414:G:A:b37	15:30134414:G:A:b37	rs785455	NA	3.4E-8	0.759	0.0446	TJP1	126654
Volume	Spleen	15:39297872:G:A:b37	15:39297872:G:A:b37	rs12899025	NA	2.1E-8	0.111	-0.0394	C15orf53	377666
Volume	Spleen	17:1958536:G:A:b37	17:1958536:G:A:b37	rs4455005	NA	8.3E-10	0.541	0.0446	HIC1	1088
Volume	Spleen	17:4901982:C:T:b37	17:4901982:C:T:b37	rs11658587	NA	7.2E-9	0.431	0.104	KIF1C	737
Volume	Spleen	19:17252974:T:C:b37	19:17252974:T:C:b37	rs61166126	NA	1.3E-12	0.34	-0.0553	MYO9B	66383
Volume	Spleen	20:39278391:T:C:b37	20:39278391:T:C:b37	rs34753522	NA	1.4E-10	0.269	-0.0478	MAFB	39485
Volume	Spleen	22:30225127:T:C:b37	22:30225127:T:C:b37	rs111907377	NA	2.4E-8	0.031	-0.0533	ASCC2	9166
Volume	Lungs	2:56128526:G:A:b37	2:56128526:G:A:b37	rs3791663	NA	1.4E-8	0.159	-0.0466	EFEMP1	22748
Volume	Lungs	3:185548663:G:A:b37	3:185548663:G:A:b37	rs2194411	NA	3.8E-9	0.957	0.0601	IGF2BP2	5819
Volume	Lungs	4:17903654:C:T:b37	4:17903654:C:T:b37	rs4144829	NA	1.0E-9	0.0951	-0.0466	NCAPG	91052
Volume	Lungs	6:142653898:A:G:b37	6:142653898:A:G:b37	rs9389985	NA	2.3E-11	0.0456	-0.0495	ADGRG6	30907
Volume	Lungs	9:98264942:A:C:b37	9:98264942:A:C:b37	rs28427480	NA	1.0E-8	0.0546	0.066	PTCH1	14397
Volume	Lungs	10:21998159:CTT:C:b37	10:21998159:CTT:C:b37	NA	NA	6.1E-10	0.0681	0.045	SKIDA1	182862
Volume	Lungs	10:125002717:T:C:b37	10:125002717:T:C:b37	rs7075615	NA	3.9E-9	0.185	0.0519	BUB3	88799
Volume	ASAT	16:53800954:T:C:b37	16:53800954:T:C:b37	rs1421085	NA	1.8000000000000003E-21	0.0622	0.0698	RPGRIP1L	63104
Volume	ASAT	19:18338709:G:A:b37	19:18338709:G:A:b37	rs62120394	NA	1.7E-8	0.101	0.045	PDE4C	20301
Volume	VAT	3:49799046:CA:C:b37	3:49799046:CA:C:b37	NA	NA	2.1E-8	0.332	0.0389	IP6K1	24929
Volume	VAT	5:55802127:TCAAGGATTCCTTGACTTAAG:T:b37	5:55802127:TCAAGGATTCCTTGACTTAAG:T:b37	NA	NA	4.1E-11	0.214	-0.0551	C5orf67	99932
Volume	VAT	8:25464670:G:T:b37	8:25464670:G:T:b37	rs73221948	NA	2.5E-11	0.983	-0.0502	CDCA2	147955
Volume	VAT	16:53803574:T:A:b37	16:53803574:T:A:b37	rs1558902	NA	3.0E-8	0.0303	0.0374	RPGRIP1L	65724
Volume	VAT	19:18383506:T:C:b37	19:18383506:T:C:b37	rs11666808	NA	3.5E-8	0.0761	-0.0377	IQCN	1813
Volume	VAT	19:33785832:CA:C:b37	19:33785832:CA:C:b37	NA	NA	1.1E-10	0.278	-0.0599	CEBPA	7608
Fat	Liver	1:220970028:A:G:b37	1:220970028:A:G:b37	rs2642438	NA	9.6E-11	0.687	0.0545	MARC1	9773
Fat	Liver	2:27753878:A:C:b37	2:27753878:A:C:b37	rs4665985	NA	1.5E-8	0.234	0.0495	C2orf16	6375
Fat	Liver	4:100472229:GATTTATAGTTCAGAGA:G:b37	4:100472229:GATTTATAGTTCAGAGA:G:b37	NA	NA	1.9E-9	0.0155	-0.0532	MTTP	12689
Fat	Liver	8:126506694:G:A:b37	8:126506694:G:A:b37	rs112875651	NA	9.3E-11	0.685	-0.0514	TRIB1	64094
Fat	Liver	9:132566666:G:A:b37	9:132566666:G:A:b37	rs7029757	NA	4.8E-9	0.996	-0.0766	TOR1B	1230
Fat	Liver	10:113950257:T:TA:b37	10:113950257:T:TA:b37	rs11446981	NA	3.6E-13	0.418	-0.0637	GPAM	24878
Fat	Liver	19:18207397:A:C:b37	19:18207397:A:C:b37	rs55714539	NA	2.4E-8	0.743	0.0455	MAST3	1206
Fat	Liver	19:19379549:C:T:b37	19:19379549:C:T:b37	rs58542926	NA	2.4999999999999996E-116	0.952	0.333	TM6SF2	4651
Fat	Liver	19:19396616:C:T:b37	19:19396616:C:T:b37	rs188247550	19:19379549:C:T:b37,19:19580964:G:T:b37	1.32E-26	0.698	0.357	TM6SF2	12416
Fat	Liver	19:19580964:G:T:b37	19:19580964:G:T:b37	rs113070129	19:19379549:C:T:b37,19:19396616:C:T:b37	1.22E-8	0.965	0.0791	TSSK6	45530
Fat	Liver	19:45411941:T:C:b37	19:45411941:T:C:b37	rs429358	NA	9.999999999999999E-31	0.989	-0.123	APOE	2893
Fat	Liver	22:44324727:C:G:b37	22:44324727:C:G:b37	rs738409	NA	1.4999999999999995E-133	0.563	0.229	PNPLA3	5108
Fat	Pancreas	1:51397564:AAT:A:b37	1:51397564:AAT:A:b37	rs775103516	NA	3.4E-13	0.115	-0.0657	FAF1	28375
Fat	Pancreas	2:208834477:C:T:b37	2:208834477:C:T:b37	rs11679492	NA	1.3E-8	0.127	0.0492	PLEKHM3	55774
Fat	Pancreas	8:129569999:G:A:b37	8:129569999:G:A:b37	rs4733612	NA	8.8E-12	0.546	-0.0656
Fat	Pancreas	9:136138765:GCGCCCACCACTA:G:b37	9:136138765:GCGCCCACCACTA:G:b37	NA	NA	2.7E-13	0.232	0.0806	ABO	12662
Fat	Pancreas	10:49313245:C:T:b37	10:49313245:C:T:b37	rs2270911	NA	1.8E-8	0.94	0.062	FAM25C	105411
Fat	Pancreas	12:4122179:AAAG:A:b37	12:4122179:AAAG:A:b37	rs751370420	NA	2.4E-11	0.196	-0.0582	PARP11	139565
Fat	Pancreas	16:88975910:G:C:b37	16:88975910:G:C:b37	rs7405380	NA	6.1E-13	0.131	0.0634	PABPN1L	42842
Fat	Pancreas	19:33884104:G:A:b37	19:33884104:G:A:b37	rs118005033	19:33806276:A:G:b37,19:33894846:C:T:b37	1.7E-8	0.362	0.08	CEBPG	19513
Fat	Pancreas	19:33894846:C:T:b37	19:33894846:C:T:b37	rs10422861	NA	2.1E-22	0.372	0.0877	CEBPG	30255
Fat	Pancreas	20:48830772:A:T:b37	20:48830772:A:T:b37	rs13040225	NA	2.0E-11	0.0999	0.0578	CEBPB	23501
Iron	Liver	2:190407500:G:A:b37	2:190407500:G:A:b37	rs115380467	2:190442446:T:C:b37,2:190518610:C:T:b37	3.17E-12	0.478	0.181	SLC40A1	40984
Iron	Liver	2:190518610:C:T:b37	2:190518610:C:T:b37	rs7577758	NA	3.6E-11	0.207	0.0606	ASNSD1	7501
Iron	Liver	6:25453057:A:G:b37	6:24978511:C:G:b37	rs74662487	6:25075717:G:C:b37,6:25409314:T:C:b37	8.349999999999999E-75	0.572	0.215	CARMIL1	173751
Iron	Liver	6:25526319:C:T:b37	6:25075717:G:C:b37	rs149359690	6:24978511:C:G:b37,6:25409314:T:C:b37	9.869999999999998E-174	0.543	0.364	SCGN	126110
Iron	Liver	6:25673273:A:G:b37	6:25673273:A:G:b37	rs72838866	6:25409314:T:C:b37,6:25616453:A:G:b37,6:25627819:GA:G:b37,6:25633096:CAA:C:b37,6:25676397:G:A:b37,6:26092170:G:T:b37,6:26099279:T:G:b37,6:26123502:T:C:b37,6:26157403:A:C:b37	6.149999999999999E-97	1.0	-0.237	SCGN	20844
Iron	Liver	6:25688078:AT:A:b37	6:25633096:CAA:C:b37	NA	6:25409314:T:C:b37,6:25616453:A:G:b37,6:25627819:GA:G:b37,6:25673273:A:G:b37,6:25676397:G:A:b37,6:26092170:G:T:b37,6:26099279:T:G:b37,6:26123502:T:C:b37	0.0	0.988	1.32	SCGN	35649
Iron	Liver	6:25701973:T:TG:b37	6:25676397:G:A:b37	rs540167506	6:25409314:T:C:b37,6:25616453:A:G:b37,6:25627819:GA:G:b37,6:25633096:CAA:C:b37,6:25673273:A:G:b37,6:26092170:G:T:b37,6:26099279:T:G:b37,6:26123502:T:C:b37,6:26157403:A:C:b37	0.0	0.994	1.36	HIST1H2AA	24782
Iron	Liver	6:25897618:G:T:b37	6:25409314:T:C:b37	rs72830103	6:24978511:C:G:b37,6:25075717:G:C:b37,6:25616453:A:G:b37,6:25627819:GA:G:b37,6:25633096:CAA:C:b37,6:25673273:A:G:b37,6:25676397:G:A:b37	7.89E-31	0.631	0.149	SLC17A3	15104
Iron	Liver	6:26010459:A:G:b37	6:26099279:T:G:b37	rs114157910	6:25616453:A:G:b37,6:25627819:GA:G:b37,6:25633096:CAA:C:b37,6:25673273:A:G:b37,6:25676397:G:A:b37,6:26092170:G:T:b37,6:26123502:T:C:b37,6:26157403:A:C:b37,6:26409729:G:A:b37,6:26594542:CAA:C:b37	0.0	0.971	1.27	HIST1H1A	7501
Iron	Liver	6:26059135:A:T:b37	6:26157403:A:C:b37	rs73736527	6:25673273:A:G:b37,6:25676397:G:A:b37,6:26092170:G:T:b37,6:26099279:T:G:b37,6:26123502:T:C:b37,6:26409729:G:A:b37,6:26594542:CAA:C:b37	1.95E-39	1.0	0.303	HIST1H1C	2479
Iron	Liver	6:26072992:C:T:b37	6:26123502:T:C:b37	rs144861591	6:25627819:GA:G:b37,6:25633096:CAA:C:b37,6:25673273:A:G:b37,6:25676397:G:A:b37,6:26092170:G:T:b37,6:26099279:T:G:b37,6:26157403:A:C:b37,6:26409729:G:A:b37,6:26594542:CAA:C:b37	4.349999999999999E-136	0.998	0.372	HFE	14517
Iron	Liver	6:26095736:T:TA:b37	6:26092170:G:T:b37	rs11465177	6:25616453:A:G:b37,6:25627819:GA:G:b37,6:25633096:CAA:C:b37,6:25673273:A:G:b37,6:25676397:G:A:b37,6:26099279:T:G:b37,6:26123502:T:C:b37,6:26157403:A:C:b37,6:26409729:G:A:b37	0.0	0.995	0.303	HFE	8227
Iron	Liver	6:26104632:T:G:b37	6:26594542:CAA:C:b37	rs198851	6:26099279:T:G:b37,6:26123502:T:C:b37,6:26157403:A:C:b37,6:26409729:G:A:b37,6:26668278:A:G:b37,6:26877794:A:G:b37,6:26925572:A:G:b37,6:27001055:C:G:b37	2.8999999999999993E-73	0.638	-0.194	HIST1H4C	528
Iron	Liver	6:26354464:G:A:b37	6:26668278:A:G:b37	rs36085954	6:26409729:G:A:b37,6:26594542:CAA:C:b37,6:26877794:A:G:b37,6:26925572:A:G:b37,6:27001055:C:G:b37	8.279999999999998E-95	1.0	0.224	BTN3A2	10923
Iron	Liver	6:26377991:C:G:b37	6:26877794:A:G:b37	rs34637389	6:26409729:G:A:b37,6:26594542:CAA:C:b37,6:26668278:A:G:b37,6:26925572:A:G:b37,6:27001055:C:G:b37,6:27244231:C:CT:b37	2.3899999999999997E-66	1.0	0.191	BTN2A2	5333
Iron	Liver	6:26500563:G:T:b37	6:26925572:A:G:b37	rs13194984	6:26594542:CAA:C:b37,6:26668278:A:G:b37,6:26877794:A:G:b37,6:27001055:C:G:b37,6:27244231:C:CT:b37	1.28E-38	0.929	0.143	BTN1A1	886
Iron	Liver	6:27001055:C:G:b37	6:27001055:C:G:b37	rs13191659	NA	2.4999999999999995E-135	0.999	0.34	HIST1H2BJ	99474
Iron	Liver	6:27122444:A:G:b37	6:27519947:G:A:b37	rs71559014	6:27244231:C:CT:b37,6:27509360:CT:C:b37,6:27515776:G:A:b37,6:27885356:T:G:b37,6:27929732:T:G:b37,6:27955287:G:T:b37	4.939999999999998E-112	0.566	0.315	HIST1H2AH	7536
Iron	Liver	6:27141207:CTTTTTTTTTTTTTTTTT:C:b37	6:27515776:G:A:b37	NA	6:27244231:C:CT:b37,6:27509360:CT:C:b37,6:27519947:G:A:b37,6:27885356:T:G:b37,6:27929732:T:G:b37,6:27955287:G:T:b37	3.959999999999999E-63	1.0	-0.193
Iron	Liver	6:27336489:T:C:b37	6:27244231:C:CT:b37	rs6914864	6:26877794:A:G:b37,6:26925572:A:G:b37,6:27001055:C:G:b37,6:27509360:CT:C:b37,6:27515776:G:A:b37,6:27519947:G:A:b37	1.6E-29	0.5	0.0904	ZNF391	5905
Iron	Liver	6:27497148:A:T:b37	6:27955287:G:T:b37	rs6908155	6:27509360:CT:C:b37,6:27515776:G:A:b37,6:27519947:G:A:b37,6:27885356:T:G:b37,6:27929732:T:G:b37,6:28036251:G:A:b37,6:28383898:C:T:b37,6:28386598:TA:T:b37,6:28431924:C:A:b37	4.209999999999999E-108	1.0	-0.207	ZNF184	56251
Iron	Liver	6:27586230:T:C:b37	6:28036251:G:A:b37	rs13217599	6:27885356:T:G:b37,6:27929732:T:G:b37,6:27955287:G:T:b37,6:28383898:C:T:b37,6:28386598:TA:T:b37,6:28431924:C:A:b37	6.15E-100	0.957	0.292	ZNF184	145333
Iron	Liver	6:27885356:T:G:b37	6:27885356:T:G:b37	rs731132	6:27509360:CT:C:b37,6:27515776:G:A:b37,6:27519947:G:A:b37,6:27929732:T:G:b37,6:27955287:G:T:b37,6:28036251:G:A:b37,6:28383898:C:T:b37	1.48E-20	0.999	-0.0736	OR2B2	5182
Iron	Liver	6:28421380:CT:C:b37	6:28431924:C:A:b37	NA	6:27955287:G:T:b37,6:28036251:G:A:b37,6:28383898:C:T:b37,6:28386598:TA:T:b37	3.68E-22	0.365	0.118	ZSCAN23	10101
Iron	Liver	6:28626101:C:G:b37	6:28383898:C:T:b37	rs114179634	6:27885356:T:G:b37,6:27929732:T:G:b37,6:27955287:G:T:b37,6:28036251:G:A:b37,6:28386598:TA:T:b37,6:28431924:C:A:b37	9.939999999999999E-90	0.631	0.29	ZBED9	42112
Iron	Liver	6:28884150:G:A:b37	6:28386598:TA:T:b37	rs3131099	6:27929732:T:G:b37,6:27955287:G:T:b37,6:28036251:G:A:b37,6:28383898:C:T:b37,6:28431924:C:A:b37	9.12E-18	0.66	-0.0654	TRIM27	7615
Iron	Liver	22:37462936:A:G:b37	22:37462936:A:G:b37	rs855791	NA	8.299999999999999E-31	0.992	0.0901	KCTD17	15160
Iron	Pancreas	8:129547378:G:A:b37	8:129547378:G:A:b37	rs12676584	NA	3.2E-8	0.234	-0.0521

[truncated: 4 more sheets: File 1i Colocalization with com, Sheet1, File 1j Colocalization with gen, File 1k Lambda GC from pruned S]
